# Supplementary material for: Genomic analyses provide insights into peach local adaptation and responses to climate change
Source: Genome Res. 2021 Apr;31(4):592–606. doi: 10.1101/gr.261032.120 (PMC8015852; doi:10.1101/gr.261032.120)
Supplement: Supplemental Material [file supp_gr.261032.120_Supplemental_Tables.xlsx]

## Sheet: Table S1
Table S1 Geographic distribution and sequencing summary of 263 peach accessions.
ID	Accessions name	Botanical varieties	Types	Origin	Lontitude (E)	Latitude (N)	Mapping rate(%)	insert size (bp)	depth	coverage	total reads	total bases	read length	Used for SNP verification or not
popu1_sample1	Anlong Bai Tao	Prunus persica L.	Landrace	Guizhou, PRC	105.38	25.14	97.79	282	6.22	95.7	11795876	1474484500	125	YES
popu1_sample2	Bai He Tao	Prunus persica L.	Landrace	Guizhou, PRC	106.71	26.63	97.86	293	4.73	94.8	8906788	1113348500	125	YES
popu1_sample3	Bai Li Hu	Prunus persica L.	Landrace	Yunnan, PRC	103.5	23.35	98.46	289	7.39	97	13726734	1715841750	125	YES
popu1_sample4	Bai Nian He	Prunus persica L.	Landrace	Yunnan, PRC	103.5	23.35	97.88	292	4.88	94.6	9180388	1147548500	125	YES
popu1_sample5	Jushan Tong Tao	Prunus persica L.	Landrace	Guizhou, PRC	104.86	25	97.79	285	4.6	94.4	8705960	1088245000	125	YES
popu1_sample6	Guizhou Shui Mi	Prunus persica L.	Landrace	Guizhou, PRC	106.71	26.63	98	291	6.99	96.2	13132182	1641522750	125	YES
popu1_sample7	Pingyong Tao	Prunus persica L.	Landrace	Guizhou, PRC	107.98	26.58	98.17	293	5.55	95.4	10495052	1311881500	125	YES
popu1_sample8	Qiu Bai Tao	Prunus persica L.	Landrace	Yunnan, PRC	102.87	24.87	97.6	283	4.58	94.1	8668778	1083597250	125	YES
popu1_sample9	Er Zao Tao	Prunus persica L.	Landrace	Yunnan, PRC	102.87	24.87	98.32	281	5.51	95.3	10372426	1296553250	125	YES
popu1_sample10	Wangmo Xiao Mi Tao	Prunus persica L.	Landrace	Guizhou, PRC	106.17	25.23	96.71	294	6.37	96.6	12159998	1519999750	125	YES
popu1_sample11	Wuda Tao	Prunus persica L.	Landrace	Guizhou, PRC	106.71	26.63	98.16	289	5.58	95.4	10535894	1316986750	125	YES
popu1_sample12	Jiuyang Qing Tao	Prunus persica L.	Landrace	Guizhou, PRC	108.69	26.65	98.13	294	5.33	94.5	10027898	1253487250	125	YES
popu1_sample13	Xingyi Bai Hua Tao	Prunus persica L.	Landrace	Guizhou, PRC	104.86	25	98.29	297	6.95	96.9	13028750	1628593750	125	YES
popu1_sample14	Xingyi Wu Yue Tao	Prunus persica L.	Landrace	Guizhou, PRC	104.86	25	97.69	298	7.23	97.2	13711286	1713910750	125	YES
popu1_sample15	Qing Tao	Prunus persica L.	Landrace	Guizhou, PRC	105.38	25.14	94.04	471	2.41	85.4	13992526	685633774	49	YES
popu1_sample16	Kuanxi Tao	Prunus persica L.	Landrace	Yunnan, PRC	102.4	24.26	98.4	303	5.82	95.7	10902178	1362772250	125
popu1_sample17	Da Jin Dan	Prunus persica L.	Landrace	Yunnan, PRC	102.87	24.87	97.18	304	5.02	95	9627558	1203444750	125
popu1_sample18	Bai Nian Hu	Prunus persica L.	Landrace	Yunnan, PRC	103.5	23.35	97.74	312	5.18	95	9821596	1227699500	125
popu1_sample19	Fei Jing Tao	Prunus persica L.	Landrace	Yunnan, PRC	102.55	24.37	98.12	284	5.97	96.1	11148888	1393611000	125
popu1_sample20	Huang Yan	Prunus persica L.	Landrace	Yunnan, PRC	102.58	24.61	98.72	282	5.55	95.2	10289276	1286159500	125
popu1_sample22	Qing Si	Prunus persica L.	Landrace	Yunnan, PRC	102.71	26.63	91.45	470	3.44	88.7	18001600	882078400	49
popu1_sample23	Huo Lian Jin Dan	Prunus persica L.	Landrace	Yunnan, PRC	102.87	24.87	94.58	484	5.71	96.3	33681910	1650413590	49
popu1_sample24	Huang Nian Hu	Prunus persica L.	Landrace	Yunnan, PRC	103.5	23.35	98.22	291	5.14	94.7	9668036	1208504500	125
popu1_sample25	Xiao Jin Dan	Prunus persica L.	Landrace	Yunnan, PRC	102.87	24.87	96.17	536	9.31	96	18078544	2259818000	125
popu2_sample1	Xinjiang Huang Rou	Prunus persica L.	Landrace	Xinjiang, PRC	75.94	39.52	96.3	475	3.12	90.2	17169172	841289428	49
popu2_sample2	Zao Shu Huang Gan	Prunus persica L.	Landrace	Gansu, PRC	108.11	35.57	94.26	478	5.26	95.9	32033698	1569651202	49
popu2_sample3	Xiamiao 1	Prunus persica L.	Landrace	Shaanxi, PRC	109.24	34.88	94.31	473	2.51	86.2	14290934	700255766	49
popu2_sample4	Long 1-2-4	Prunus persica L.	Landrace	Gansu, PRC	108.11	35.57	96.16	467	2.21	83.6	12446620	609884380	49
popu2_sample5	Long 2-4-6	Prunus persica L.	Landrace	Gansu, PRC	108.11	35.57	97.89	306	6.01	96.2	11388394	1423549250	125
popu2_sample6	Long 1-2-6	Prunus persica L.	Landrace	Gansu, PRC	108.11	35.57	98.34	304	6.09	95.8	11438482	1429810250	125
popu2_sample7	Long 1-2-3	Prunus persica L.	Landrace	Gansu, PRC	108.11	35.57	97.79	302	6.64	96	12559016	1569877000	125
popu2_sample8	Da Li He Huang Rou	Prunus persica L.	Landrace	Xinjiang, PRC	79.94	37.12	97.21	287	5.15	94	9809950	1226243750	125
popu2_sample9	Yexiang Huang Rou Tao	Prunus persica L.	Landrace	Xinjiang, PRC	77.22	36.99	96.91	288	5.1	93.7	9788282	1223535250	125
popu2_sample10	Jiangcun 4	Prunus persica L.	Landrace	Gansu, PRC	108.11	35.57	98.72	287	7.13	96	13214908	1651863500	125
popu2_sample11	Lin Huang 1	Prunus persica L.	Landrace	Gansu, PRC	100.19	39.35	97.35	281	4.49	94.4	8585118	1073139750	125
popu2_sample12	Mo Yu 8	Prunus persica L.	Landrace	Xinjiang, PRC	79.94	37.12	96.77	286	5.35	94.6	10292810	1286601250	125
popu2_sample13	Nan Shan 1	Prunus persica L.	Landrace	Gansu, PRC	108.11	35.57	97.9	286	7.14	96.3	13391032	1673879000	125
popu2_sample14	Tie 4-1	Prunus persica L.	Landrace	Xinjiang, PRC	77.22	36.99	97.06	292	5.16	93.8	9880650	1235081250	125	YES
popu2_sample15	Tugou 1	Prunus persica L.	Landrace	Gansu, PRC	108.11	35.57	98.21	281	6.61	95.5	12443314	1555414250	125	YES
popu2_sample16	Tu-2	Prunus persica L.	Landrace	Xinjiang, PRC	77.22	36.99	97.89	307	5.3	95	9980962	1247620250	125	YES
popu2_sample17	Xijiao 2	Prunus persica L.	Landrace	Shaanxi, PRC	109.24	34.88	98.16	275	6.97	96	13052068	1631508500	125	YES
popu2_sample18	Yili Xian Huang Rou	Prunus persica L.	Landrace	Xinjiang, PRC	81.29	43.92	97.98	281	7.09	95.8	13491332	1686416500	125	YES
popu2_sample19	Kashi Huang Rou Li Guang	Prunus persica L.	Landrace	Xinjiang, PRC	75.94	39.52	94.72	478	5.74	97.2	36480876	1787562924	49	YES
popu2_sample21	Huang Li Guang	Prunus persica L.	Landrace	Xinjiang, PRC	77.22	36.99	97.72	265	6.82	96.8	12913698	1614212250	125	YES
popu2_sample22	Suan Li Guang	Prunus persica L.	Landrace	Xinjiang, PRC	75.94	39.52	98.35	298	7.4	96.2	13842224	1730278000	125	YES
popu2_sample23	Tian Li Guang	Prunus persica L.	Landrace	Xinjiang, PRC	75.94	39.52	98.45	281	6.6	95.8	12313236	1539154500	125	YES
popu2_sample24	Hong Li Guang	Prunus persica L.	Landrace	Xinjiang, PRC	77.22	36.99	92.57	475	3.69	90.4	19029386	932439914	49	YES
popu2_sample25	Jinta You Pan Tao	Prunus persica L.	Landrace	Gansu, PRC	99.19	40.38	94.33	470	2.95	89	16666122	816639978	49	YES
popu2_sample26	Xijiao 3	Prunus persica L.	Landrace	Shaanxi, PRC	109.24	34.88	98.78	307	7.52	96.9	13926428	1740803500	125	YES
popu2_sample27	Dunhuang Dong Tao	Prunus persica L.	Landrace	Gansu, PRC	94.16	40.39	97.03	310	6.8	95.7	12992526	1624065750	125	YES
popu2_sample28	Gaotai 1	Prunus persica L.	Landrace	Gansu, PRC	99.6	40.1	98.15	302	5.52	95.7	10417952	1302244000	125	YES
popu2_sample29	Bai Sha	Prunus persica L.	Landrace	Shaanxi, PRC	108.19	34.32	98.54	300	5.65	96.1	10509516	1313689500	125	YES
popu2_sample30	Kashi 2	Prunus ferganensis Kost. et Riab	Landrace	Xinjiang, PRC	75.94	39.52	97.68	280	6.84	95.4	13010394	1626299250	125	YES
popu2_sample31	Kashi 3	Prunus ferganensis Kost. et Riab	Landrace	Xinjiang, PRC	75.94	39.52	97.66	276	5.69	94.1	10880762	1360095250	125	YES
popu2_sample32	Kashi 4	Prunus ferganensis Kost. et Riab	Landrace	Xinjiang, PRC	75.94	39.52	97.89	274	7.52	95.8	14219520	1777440000	125	YES
popu2_sample33	Lin Bai 10	Prunus persica L.	Landrace	Gansu, PRC	100.19	39.16	94.79	287	5.58	95.4	11690800	1461350000	125	YES
popu2_sample34	Lin Bai 3	Prunus persica L.	Landrace	Gansu, PRC	100.19	39.16	97.82	300	6.56	95.4	12387462	1548432750	125	YES
popu2_sample35	Linze Zi Tao	Prunus persica L.	Landrace	Gansu, PRC	100.19	39.34	97.47	274	5.63	96.3	10641350	1330168750	125	YES
popu2_sample36	Mi Yang Shan	Prunus persica L.	Landrace	Xinjiang, PRC	79.94	37.12	98.13	297	5.55	94.5	10477852	1309731500	125	YES
popu2_sample37	Qi Tao	Prunus persica L.	Landrace	Gansu, PRC	105.74	34.58	95.55	293	4.22	91.9	8362414	1045301750	125	YES
popu2_sample38	Zhang Bai 2	Prunus persica L.	Landrace	Gansu, PRC	100.46	38.94	97.66	304	5.6	95.2	10661734	1332716750	125	YES
popu2_sample39	Zhang Bai 5	Prunus persica L.	Landrace	Gansu, PRC	100.46	38.94	97.38	311	5.84	95.4	11170772	1396346500	125	YES
popu2_sample40	Zhang Bai Gan	Prunus persica L.	Landrace	Gansu, PRC	100.46	38.94	94.64	311	6.22	96.8	12265278	1533159750	125	YES
popu2_sample41	Bi Nan I	Prunus persica L.	Landrace	Xinjiang, PRC	75.82	39.2671	90.15	471	3.12	89.9	16771954	821825746	49	YES
popu2_sample42	Bai Gen Gansu Tao 1	Prunus kansuensis Rehd.	Wild	Gansu, PRC	108.11	35.57	93.07	470	2.75	82	15738570	771189930	49	YES
popu2_sample43	Hong Gen Gansu Tao 1	Prunus kansuensis Rehd.	Wild	Gansu, PRC	108.11	35.57	92.62	470	5.07	90.2	31596448	1548225952	49	YES
popu2_sample44	Shan Gan Shan Tao	Prunus potaninii Batal.	Wild	Gansu, PRC	104.93	33.39	91.96	472	5.02	89.6	31292598	1533337302	49	YES
popu2_sample45	Li He Tian Ren	Prunus persica L.	Landrace	Xinjiang, PRC	75.94	39.52	96.82	470	8.27	96.3	22058660	1985279400	90	YES
popu2_sample46	Xinjiang Pan Tao	Prunus ferganensis Kost. et Riab	Landrace	Xinjiang, PRC	79.9014	36.5725	95.46	461	2.23	82.5	12647536	619729264	49	YES
popu2_sample47	Tian Ren Tao	Prunus ferganensis Kost. et Riab	Landrace	Xinjiang, PRC	77.22	36.99	94.48	472	5.12	95.3	30162614	1477968086	49	YES
popu2_sample48	Kashi 1	Prunus ferganensis Kost. et Riab	Landrace	Xinjiang, PRC	75.94	39.52	94.76	475	2.57	86.2	15037244	736824956	49	YES
popu2_sample49	Rou Pan Tao	Prunus persica L.	Landrace	Gansu, PRC	99.19	40.38	96.43	472	2.51	86	13890840	680651160	49
popu2_sample50	Longsheng Pan Tao	Prunus persica L.	Landrace	Gansu, PRC	98.9134	39.9894	97.75	291	4.75	95.6	9010960	1126370000	125
popu2_sample51	Longsheng Da Wan Tao	Prunus persica L.	Landrace	Gansu, PRC	98.9134	39.9894	97.25	290	4.87	93.8	9293118	1161639750	125
popu2_sample52	Dujiadun Wan Ge Da Tao	Prunus persica L.	Landrace	Gansu, PRC	94.624	40.1069	97.11	301	4.44	93.3	8551620	1068952500	125
popu2_sample53	Tayuan Nian He Tao	Prunus persica L.	Landrace	Gansu, PRC	98.9192	39.969	97.46	295	4.31	93.4	8221748	1027718500	125
popu2_sample54	Dingjiaba Qing Pi Tao	Prunus persica L.	Landrace	Gansu, PRC	98.3975	39.7803	97.41	281	4.97	94.5	9517578	1189697250	125
popu2_sample55	Dingjiaba Hong Li Guang Tao	Prunus persica L.	Landrace	Gansu, PRC	98.3975	39.7803	97.56	318	4.54	93.8	8716166	1089520750	125
popu2_sample56	Yueya Wan Ge Da Tao	Prunus persica L.	Landrace	Gansu, PRC	94.6614	40.094	98.3	286	5.2	94.9	9926496	1240812000	125
popu2_sample57	Yueya Hong Li Guang	Prunus persica L.	Landrace	Gansu, PRC	94.6614	40.094	98.56	284	6.44	96.5	12289702	1536212750	125
popu2_sample58	Damiao Qing Pi Tao	Prunus persica L.	Landrace	Gansu, PRC	95.5767	40.0887	97.62	313	4.74	94.6	9116130	1139516250	125
popu2_sample59	Hongguang Wan Li Guang Tao	Prunus persica L.	Landrace	Gansu, PRC	98.9134	39.9894	96.99	299	4.56	94.2	8791074	1098884250	125
popu2_sample60	Huangguang Da Li Guang Tao	Prunus persica L.	Landrace	Gansu, PRC	98.9134	39.9895	97.27	299	4.56	94.1	8763972	1095496500	125
popu2_sample61	Longsheng Xin Jiang Tao	Prunus persica L.	Landrace	Gansu, PRC	98.9134	39.9894	97.89	293	4.65	93.3	8784980	1098122500	125
popu2_sample62	Xidong Xiao Li Guang Tao	Prunus persica L.	Landrace	Gansu, PRC	98.4063	39.6769	98.04	280	4.96	94.7	9471012	1183876500	125
popu2_sample63	Qinjiawan Zao Tao	Prunus persica L.	Landrace	Gansu, PRC	94.5668	40.0798	98.14	314	4.14	92.7	7785646	973205750	125
popu2_sample64	Yueya Da Ye Hong Li Guang	Prunus persica L.	Landrace	Gansu, PRC	94.6614	40.094	97.26	314	4.2	94.3	8007958	1000994750	125
popu2_sample65	Langanxiang 1	Prunus persica L.	Landrace	Xinjiang, PRC	75.7966	39.4645	96.77	278	7.62	96.3	14712390	1839048750	125
popu2_sample66	Langanxiang 2	Prunus persica L.	Landrace	Xinjiang, PRC	79.7967	39.4647	97.65	282	4.84	94.6	9252356	1156544500	125
popu2_sample67	Langanxiang 3	Prunus persica L.	Landrace	Xinjiang, PRC	75.7967	39.4645	97.05	281	4.21	92.5	8131164	1016395500	125
popu2_sample68	Zepu 4	Prunus persica L.	Landrace	Xinjiang, PRC	77.2888	38.2154	96.93	281	4.83	94.9	9359642	1169955250	125
popu2_sample69	Zepu 6	Prunus persica L.	Landrace	Xinjiang, PRC	77.1397	38.1323	98.14	283	4.5	93.6	8545182	1068147750	125
popu2_sample70	Zepu 8	Prunus persica L.	Landrace	Xinjiang, PRC	78.1382	38.1325	97.31	300	5.19	95.5	9988396	1248549500	125
popu2_sample71	Tupulukexiang 1	Prunus persica L.	Landrace	Xinjiang, PRC	80.2446	41.0797	96.8	284	4.93	95.1	9562242	1195280250	125
popu2_sample72	Tupulukexiang 3	Prunus persica L.	Landrace	Xinjiang, PRC	80.2449	41.0798	97.87	295	4.84	94	9189288	1148661000	125
popu2_sample73	Ping Ding Qiu Tao	Prunus persica L.	Landrace	Gansu, PRC	105.621	34.5188	97.45	275	5.8	96.4	11043378	1380422250	125	YES
popu2_sample74	Qingling Dong Tao	Prunus persica L.	Landrace	Shaanxi, PRC	107.83	34.15	97.26	296	7.24	96.9	13665698	1708212250	125	YES
popu2_sample75	Tai Bai	Prunus persica L.	Landrace	Shaanxi, PRC	108.072	34.2611	98.96	275	7.34	97.4	13579080	1697385000	125	YES
popu2_sample76	Jinta Hong Guang	Prunus persica L.	Landrace	Gansu, PRC	99.19	40.38	96.34	546	8.13	96	15706136	1963267000	125	YES
popu2_sample77	Jiangcun 1	Prunus persica L.	Landrace	Gansu, PRC	108.11	35.57	97.27	517	9.33	95.4	17864908	2233113500	125	YES
popu2_sample78	Xizhuang 1	Prunus persica L.	Landrace	Gansu, PRC	107.51	35.13	95.95	500	9.89	96.9	19220384	2402548000	125	YES
popu3_sample1	Qingzhou Hong Pi Mi Tao	Prunus persica L.	Landrace	Shandong, PRC	118.47	36.68	98.29	287	6.45	95.1	12075866	1509483250	125	YES
popu3_sample2	Taiyuan Shui Mi	Prunus persica L.	Landrace	Shanxi, PRC	112.52	37.82	96.68	517	8.81	96.9	16921052	2115131500	125	YES
popu3_sample3	Shenzhou Bai Mi	Prunus persica L.	Landrace	Hebei, PRC	115.6	37.84	95.12	291	6.01	95.8	11882994	1485374250	125	YES
popu3_sample4	Shenzhou Li He Shui Mi	Prunus persica L.	Landrace	Hebei, PRC	115.59	37.96	96.21	293	7.29	97.5	14208952	1776119000	125	YES
popu3_sample5	Er Jie Bai	Prunus persica L.	Landrace	Henan, PRC	113.86	34.03	97.67	307	4.92	95.6	9301518	1162689750	125	YES
popu3_sample6	Feicheng Bai Li 17	Prunus persica L.	Landrace	Shandong, PRC	116.74	36.11	97.63	304	5.31	94.7	10028868	1253608500	125	YES
popu3_sample7	Han Lu Mi	Prunus persica L.	Landrace	Shandong, PRC	120.58	36.2	98.14	289	7.42	96.1	13928602	1741075250	125	YES
popu3_sample8	Hong Tao	Prunus persica L.	Landrace	Beijing, PRC	116.22	40.22	97.35	302	6.74	96.4	12838450	1604806250	125	YES
popu3_sample9	Ji Zui Bai	Prunus persica L.	Landrace	Henan, PRC	114.56	33.52	98.17	301	5.89	96	10955660	1369457500	125	YES
popu3_sample10	Licheng Tao	Prunus persica L.	Landrace	Shandong, PRC	117.36	34.8	97.81	297	6.35	95.9	12025556	1503194500	125	YES
popu3_sample11	Liu Yue Bai	Prunus persica L.	Landrace	Hebei, PRC	114.52	38.05	92.61	287	5.43	94.6	11306724	1413340500	125	YES
popu3_sample12	Liu Yue Kong	Prunus persica L.	Landrace	Henan, PRC	114.48	33.79	97.66	284	7.03	97.1	13278634	1659829250	125	YES
popu3_sample13	Xiao Bai Tao	Prunus persica L.	Landrace	Henan, PRC	114.65	33.62	96.11	295	7.13	96.9	13891286	1736410750	125	YES
popu3_sample14	Yangquan Rou Tao	Prunus persica L.	Landrace	Shanxi, PRC	113.57	37.87	97.77	316	5.01	94.5	9463618	1182952250	125	YES
popu3_sample15	Yexian Dong Tao	Prunus persica L.	Landrace	Henan, PRC	113.35	33.55	98.04	302	6.12	96.1	11523654	1440456750	125	YES
popu3_sample16	Wu Yue Bai	Prunus persica L.	Landrace	Henan, PRC	114.47	33.79	97.21	292	5.8	97.5	11103980	1387997500	125	YES
popu3_sample17	Da Xue Tao	Prunus persica L.	Landrace	Hebei, PRC	115.28	38.97	93.41	477	3.71	88.9	19041362	933026738	49	YES
popu3_sample18	Da Hong Tao	Prunus persica L.	Landrace	Shanxi, PRC	111.1	34.99	98.71	306	5.94	96.1	11108046	1388505750	125	YES
popu3_sample19	Hong Ya Zui	Prunus persica L.	Landrace	Hebei, PRC	119.09	39.64	90.16	476	4.03	90.3	21949838	1075542062	49	YES
popu3_sample20	Ge Gu	Prunus persica L.	Landrace	Hebei, PRC	119.09	39.64	89.15	467	2.97	85	16020352	784997248	49	YES
popu3_sample21	Feicheng Hong Li 6	Prunus persica L.	Landrace	Shandong, PRC	116.74	36.11	91.6	492	2.49	82.3	12970864	635572336	49	YES
popu3_sample22	Shandong Si Yue Ban	Prunus persica L.	Landrace	Shandong, PRC	116.68	36.72	90.33	475	3.09	85.5	16689298	817775602	49	YES
popu3_sample23	Qingzhou Bai Pi Mi Tao	Prunus persica L.	Landrace	Shandong, PRC	118.47	36.68	95.28	472	5.3	95.7	31247402	1531122698	49	YES
popu3_sample24	Feicheng Bai Li 10	Prunus persica L.	Landrace	Shandong, PRC	116.4	39.93	94.5	473	5.37	96	32600538	1597426362	49	YES
popu3_sample25	Shi Wo Shui Mi	Prunus persica L.	Landrace	Beijing, PRC	116.4	39.93	95.02	485	2.46	84.8	14470174	709038526	49	YES
popu3_sample26	Wu yue Xian	Prunus persica L.	Landrace	Beijing, PRC	116.4	39.93	94.02	469	2.4	84.4	13703672	671479928	49	YES
popu3_sample27	Shenzhou Shui Mi	Prunus persica L.	Landrace	Hebei, PRC	115.59	37.96	93.92	484	2.47	84.8	14292576	700336224	49	YES
popu3_sample29	Bai Hua Shan Tao	Prunus davidiana (Carr.) Franch.	Wild	Henan, PRC	112.667	35.1333	92.2	467	3.11	83	17963430	880208070	49	YES
popu3_sample30	Zhou Xing Shan Tao	Prunus davidiana (Carr.) Franch.	Wild	Henan, PRC	112.665	35.1333	92.26	455	3.22	83.9	18498908	906446492	49	YES
popu3_sample31	Bai Hua Shan Bi Tao	Prunus davidiana (Carr.) Franch.	Wild	Henan, PRC	116.217	39.95	92.52	477	2.19	81.6	13217988	647681412	49
popu3_sample32	Ju Hua Tao	Prunus persica L.	Landrace	Henan, PRC	113.7	35.7333	93.71	476	2.49	84.1	14405794	705883906	49
popu3_sample33	Sa Hong Tao	Prunus persica L.	Landrace	Henan, PRC	113.7	35.7333	93.41	469	2.76	86.3	16034182	785674918	49
popu3_sample34	Hong Shou Xing	Prunus persica L.	Landrace	Henan, PRC	113.7	35.7333	93.83	478	2.59	85.4	15097204	739762996	49
popu3_sample35	Hong Hua Bi Tao	Prunus persica L.	Landrace	Henan, PRC	113.7	35.7333	95.32	485	4.79	93.8	23885966	1170412334	49
popu3_sample36	Hong Ye Tao	Prunus persica L.	Landrace	Henan, PRC	113.7	35.7333	93.99	484	2.99	87.2	15013816	735676984	49
popu3_sample37	Wu Bao Tao	Prunus persica L.	Landrace	Henan, PRC	113.7	35.7333	97.84	293	5.07	94.4	9583826	1197978250	125
popu3_sample39	Fen Shou Xing	Prunus persica L.	Landrace	Henan, PRC	113.7	35.7333	92.79	476	2.57	85.1	14943628	732237772	49
popu3_sample40	Hong Chui Zhi	Prunus persica L.	Landrace	Henan, PRC	113.7	35.7333	94.16	482	2.21	80.7	12710354	622807346	49
popu3_sample41	Zhu Fen Chui Zhi	Prunus persica L.	Landrace	Henan, PRC	113.7	35.7333	93.45	475	2.49	83.4	14300638	700731262	49
popu3_sample42	Yuan Yang Chui Zhi	Prunus persica L.	Landrace	Henan, PRC	113.7	35.7333	93	481	2.47	82.9	14492542	710134558	49
popu3_sample43	Zhong Hua Shou Tao	Prunus persica L.	Landrace	Shandong, PRC	120.71	37.19	96.33	483	7.9	95.6	21218036	1909623240	90
popu3_sample44	Wu Yue Xian Biao Gan	Prunus persica L.	Landrace	Beijing, PRC	115.94	39.7	94.73	475	2.54	86.1	14458146	708449154	49	YES
popu3_sample45	Yi Xian Hong	Prunus persica L.	Landrace	Hebei, PRC	119.09	39.64	98.3	296	6.6	96	12280328	1535041000	125	YES
popu3_sample46	Suan Tao	Prunus persica L.	Landrace	Shandong, PRC	116.71	36.17	95.41	479	3.26	90.4	17852864	874790336	49	YES
popu3_sample47	Da Guo Hei Tao	Prunus persica L.	Landrace	Shandong, PRC	117.36	34.8	96.66	479	6.8	95.1	18055584	1625002560	90	YES
popu3_sample48	Tianjin Shui Mi	Prunus persica L.	Landrace	Tianjin, PRC	117.21	39.14	94.18	481	2.86	87.7	16627466	814745834	49	YES
popu3_sample49	Yuan Chun Bai	Prunus persica L.	Landrace	Hebei, PRC	119.6	39.95	97.04	311	5.65	95.7	10826478	1353309750	125	YES
popu3_sample50	Gucheng Da Hong Pao	Prunus persica L.	Landrace	Henan, PRC	114.65	33.62	98.42	293	6.5	96.8	12136828	1517103500	125	YES
popu4_sample1	Diao Zhi Bai	Prunus persica L.	Landrace	Anhui, PRC	117.28	31.87	94.56	480	3.86	90.7	19405256	950857544	49	YES
popu4_sample2	Ping Bei Zi	Prunus persica L.	Landrace	Jiangsu, PRC	118.78	32.06	89.82	477	3.56	88.7	19178928	939767472	49	YES
popu4_sample3	Zao Shanghai Shui Mi	Prunus persica L.	Landrace	Shanghai, PRC	121.49	31.25	90.78	478	5.21	97	33998944	1665948256	49	YES
popu4_sample4	Ying Zui	Prunus persica L.	Landrace	Anhui, PRC	115.79	33.87	94.9	477	2.45	85	13878100	680026900	49	YES
popu4_sample5	Chinese Cling	Prunus persica L.	Landrace	Shanghai, PRC	121.49	31.25	93.96	485	2.49	84.2	14886642	729445458	49	YES
popu4_sample6	Huo Zhu	Prunus persica L.	Landrace	Jiangsu, PRC	118.78	32.06	97.62	289	7.44	96.8	14025604	1753200500	125	YES
popu4_sample7	Hu Jing Mi Lu	Prunus persica L.	Landrace	Jiangsu, PRC	120.31	31.57	94.75	292	5.68	95.1	11319732	1414966500	125	YES
popu4_sample8	Bai Hua	Prunus persica L.	Landrace	Jiangsu, PRC	120.31	31.57	95.34	471	2.31	82.4	13338412	653582188	49	YES
popu4_sample10	Changling Zao Yu Lu	Prunus persica L.	Landrace	Zhejiang, PRC	121.38	29.62	93.65	262	5.02	93.7	10365690	1295711250	125	YES
popu4_sample11	Da Tian Tao	Prunus persica L.	Landrace	Jiangsu, PRC	118.78	32.06	98.17	303	5.51	96	10330284	1291285500	125	YES
popu4_sample12	Shui Bai Tao	Prunus persica L.	Landrace	Jiangsu, PRC	118.78	32.06	91.31	297	5.55	94.6	11375626	1421953250	125	YES
popu4_sample13	Wenzhou Shui Mi	Prunus persica L.	Landrace	Zhejiang, PRC	120.69	28	97.62	296	6.81	96.3	12877672	1609709000	125	YES
popu4_sample14	Wujiang Bai	Prunus persica L.	Landrace	Jiangsu, PRC	120.64	31.01	94.28	296	5.17	94.4	10332850	1291606250	125	YES
popu4_sample15	Xiao Hong Hua	Prunus persica L.	Landrace	Jiangsu, PRC	120.31	31.57	94.91	280	5.12	93.8	10258812	1282351500	125	YES
popu4_sample16	Yang Tao	Prunus persica L.	Landrace	Shanghai, PRC	121.49	31.25	93.54	291	6.43	95.9	13093628	1636703500	125	YES
popu4_sample17	Shang Shan Da Yu Lu	Prunus persica L.	Landrace	Zhejiang, PRC	121.38	29.62	90.16	268	4.74	92.7	10365746	1295718250	125	YES
popu4_sample18	Longhua Shui Mi	Prunus persica L.	Landrace	Shanghai, PRC	121.49	31.25	98.35	272	5.98	95.4	11195630	1399453750	125	YES
popu4_sample19	Lulin Shui Mi	Prunus persica L.	Landrace	Jiangsu, PRC	119.79	31.36	98.35	295	5.38	95.3	10036826	1254603250	125
popu4_sample20	Su Hong	Prunus persica L.	Landrace	Jiangsu, PRC	118.78	32.06	98.36	313	6.27	96.4	11728844	1466105500	125
popu4_sample21	San Hua Hong Pan Tao	Prunus persica L.	Landrace	Shanghai, PRC	121.49	31.25	94.09	470	5.52	95.7	34874332	1708842268	49
popu4_sample22	Jiaqing Pan Tao	Prunus persica L.	Landrace	Zhejiang, PRC	120.22	30.26	97.19	275	6.38	95.7	12204692	1525586500	125
popu4_sample23	Li He Pan Tao	Prunus persica L.	Landrace	Zhejiang, PRC	120.22	30.26	97.3	268	5.58	96	11062308	1382788500	125
popu4_sample24	Bai Mang Pan Tao	Prunus persica L.	Landrace	Shanghai, PRC	121.45	31.17	97.41	270	5.85	94.7	11280114	1410014250	125	YES
popu4_sample25	Chang Sheng Pan Tao	Prunus persica L.	Landrace	Shanghai, PRC	121.49	31.25	97.35	296	5.96	94.8	11506140	1438267500	125	YES
popu4_sample26	Fenghua Pan Tao	Prunus persica L.	Landrace	Zhejiang, PRC	121.38	29.62	97.37	297	6.05	94.7	11719486	1464935750	125	YES
popu4_sample27	Wan Pan Tao	Prunus persica L.	Landrace	Jiangsu, PRC	121.16	31.57	97.37	284	6.33	94.9	12312986	1539123250	125	YES
popu4_sample28	Yu Lu	Prunus persica L.	Landrace	Zhejiang, PRC	121.38	29.62	96.25	590	9.52	95.8	18455788	2306973500	125	YES
popu4_sample29	Yu Lu Pan Tao	Prunus persica L.	Landrace	Zhejiang, PRC	121.38	29.62	94.71	286	5.2	93.6	10473606	1309200750	125	YES
popu4_sample30	Huang Jin Pan Tao	Prunus persica L.	Landrace	Shanghai, PRC	121.49	31.25	96.58	495	5.86	96	15603590	1404323100	90	YES
popu4_sample31	Jian Zui Hong Rou	Prunus persica L.	Landrace	Henan, PRC	115.71	32.14	97.94	275	5.31	96.3	9915538	1239442250	125	YES
popu4_sample32	Jingmen Tao	Prunus persica L.	Landrace	Hubei, PRC	112.22	31.04	98.48	297	4.01	93.2	7490046	936255750	125	YES
popu4_sample33	Wuhan Da Hong Pao	Prunus persica L.	Landrace	Hubei, PRC	114.32	30.58	98.32	284	5.17	95.8	9703370	1212921250	125	YES
popu4_sample34	Wei Jian Hong Rou	Prunus persica L.	Landrace	Henan, PRC	115.71	32.14	95.7	295	5.8	95.3	11348680	1418585000	125	YES
popu4_sample35	Hei Bu Dai	Prunus persica L.	Landrace	Henan, PRC	114.44	34.1	87.58	478	3.59	85.3	20557138	1007299762	49	YES
popu4_sample36	Da Hong Pao	Prunus persica L.	Landrace	Hubei, PRC	114.32	30.58	95.06	476	2.26	83.2	13049080	639404920	49	YES
popu4_sample37	Wu Hei Ji Rou Tao	Prunus persica L.	Landrace	Anhui, PRC	116.51	31.76	93.36	458	2.53	84.9	14631090	716923410	49	YES
popu4_sample38	Wuhan 2	Prunus persica L.	Landrace	Hubei, PRC	113.68	30	97.8	304	4.64	94.5	8769228	1096153500	125	YES
popu4_sample39	Wanzhou Suan Tao	Prunus persica L.	Landrace	Chongqing, PRC	108.41	30.71	97.73	287	9.71	97.6	18518768	2314846000	125	YES
popu5_sample1	Hunchun Tao Shi Sheng	Prunus persica L.	Landrace	Jilin, PRC	130.7	43.07	98.37	281	4.71	93.8	8864218	1108027250	125	YES
popu5_sample2	Xiang Tao	Prunus persica L.	Landrace	Liaoning, PRC	121.61	38.91	98.34	297	6.39	95.4	11960412	1495051500	125	YES
popu5_sample3	Hunchun Tao Shi Sheng	Prunus persica L.	Landrace	Jilin, PRC	130.7	43.07	94.87	475	5.72	95.3	33467472	1639906128	49	YES
popu5_sample4	Hong Hua Shan Tao	Prunus davidiana (Carr.) Franch.	Wild	Liaoning, PRC	123.43	41.81	90.79	478	4.61	87.6	29638844	1452303356	49	YES
popu5_sample5	Jilin 8701	Prunus persica L.	Landrace	Jilin, PRC	125.31	43.87	97.91	280	6.49	95.4	12385144	1548143000	125	YES
popu5_sample6	Jilin 8801	Prunus persica L.	Landrace	Jilin, PRC	124.6	43.322	98.02	289	5.95	95.2	11334188	1416773500	125	YES
popu5_sample7	Jilin 8601	Prunus persica L.	Landrace	Jilin, PRC	125.97	43.27	97.89	305	7.55	95.8	14266678	1783334750	125
popu5_sample8	Jilin 8501	Prunus persica L.	Landrace	Jilin, PRC	125.66	43.52	98.5	304	7.58	96.8	14237644	1779705500	125
popu5_sample9	Shenyang 1	Prunus persica L.	Landrace	Liaoning, PRC	123.47	41.63	96.71	306	4.5	92.9	8754456	1094307000	125
popu5_sample10	Shenyang 2	Prunus persica L.	Landrace	Liaoning, PRC	123.47	41.63	96.3	284	5.81	95.1	11506550	1438318750	125
popu5_sample11	Shenyang 3	Prunus persica L.	Landrace	Liaoning, PRC	123.47	41.63	96.88	289	6.04	96.9	11702182	1462772750	125
popu5_sample12	Shenyang 4	Prunus persica L.	Landrace	Liaoning, PRC	123.47	41.63	96.67	287	6.34	95.5	12369146	1546143250	125
popu5_sample13	Shenyang 5	Prunus persica L.	Landrace	Liaoning, PRC	123.47	41.63	97.36	289	5.08	95.9	9768226	1221028250	125
popu5_sample14	Yi Hong Shui Mi	Prunus persica L.	Landrace	Liaoning, PRC	123.47	41.63	96.94	287	5.45	96	10544274	1318034250	125
popu5_sample15	Shenyang Wu Yue Xian	Prunus persica L.	Landrace	Liaoning, PRC	123.47	41.63	97.1	300	4.78	95.8	9288358	1161044750	125
popu5_sample16	Jilin 8903	Prunus persica L.	Landrace	Jilin, PRC	125.91	42.18	94.05	467	2.48	85.3	14421058	706631842	49
popu5_sample17	Zao Huang Jin	Prunus persica L.	Landrace	Liaoning, PRC	121.61	38.91	97.96	293	6.16	96.3	11583590	1447948750	125
popu6_sample1	Rikaze Guang He Tao	Prunus mira Koehne	Wild	Tibet, PRC	88.96	29.27	89.11	472	3.09	80.6	18588588	910840812	49
popu6_sample2	Aba Guang He Tao	Prunus mira Koehne	Wild	Tibet, PRC	102.22	31.91	88.84	480	4.82	87.3	32436772	1589401828	49
popu6_sample3	Julong 11	Prunus mira Koehne	Wild	Tibet, PRC	98.68	29.06	96.11	294	4.51	82.9	9093136	1136642000	125
popu6_sample4	Julong 12	Prunus mira Koehne	Wild	Tibet, PRC	98.68	29.06	93.58	300	4.66	83	9562026	1195253250	125
popu6_sample5	Julong 13	Prunus mira Koehne	Wild	Tibet, PRC	98.68	29.06	95.53	312	5.17	84.2	10310808	1288851000	125
popu6_sample6	Julong 15	Prunus mira Koehne	Wild	Tibet, PRC	98.68	29.06	95.99	297	4.69	83.1	9355092	1169386500	125
popu6_sample7	Julong 16	Prunus mira Koehne	Wild	Tibet, PRC	98.68	29.06	95.42	297	4.94	83.9	9903298	1237912250	125
popu6_sample8	Yan Tian Jin Qu Zao Hua Tao	Prunus mira Koehne	Wild	Tibet, PRC	98.53	29.04	93.73	286	5.13	94.8	10425278	1303159750	125
popu6_sample9	Lawu 1	Prunus mira Koehne	Wild	Tibet, PRC	98.43	29.72	97.08	289	4.29	81.9	8376764	1047095500	125
popu6_sample10	Lawu 2	Prunus mira Koehne	Wild	Tibet, PRC	98.43	29.72	95.67	288	5.15	84.2	10297158	1287144750	125
popu6_sample11	Lawu 3	Prunus mira Koehne	Wild	Tibet, PRC	98.43	29.72	96.27	296	4.95	83.9	9838004	1229750500	125
popu6_sample12	Lawu 4	Prunus mira Koehne	Wild	Tibet, PRC	98.43	29.71	91.73	278	4.42	79.7	9924830	1240603750	125
popu6_sample13	Lawu 3-1	Prunus mira Koehne	Wild	Tibet, PRC	98.43	29.72	95.58	290	5.67	85.2	11355890	1419486250	125
popu6_sample14	Basu 1	Prunus mira Koehne	Wild	Tibet, PRC	96.6	29.98	92.99	282	5.29	84.3	10855706	1356963250	125
popu6_sample15	2010-138	Prunus mira Koehne	Wild	Tibet, PRC	95.39	30.2	96.03	284	5.37	84.3	10699238	1337404750	125
popu6_sample16	2010-138b	Prunus mira Koehne	Wild	Tibet, PRC	95.39	30.2	94.9	304	6.19	85.9	14081602	1760200250	125
popu6_sample17	Yuxu 1	Prunus mira Koehne	Wild	Tibet, PRC	95.39	30.2	92.48	276	4.71	81.3	10431950	1303993750	125
popu6_sample18	Yuxu 2	Prunus mira Koehne	Wild	Tibet, PRC	95.38	30.2	90.87	278	4.24	80.9	9311180	1163897500	125
popu6_sample19	Yuxu 3	Prunus mira Koehne	Wild	Tibet, PRC	95.35	30.26	89.96	271	5.34	84.6	11365888	1420736000	125
popu6_sample20	Yuxu 4	Prunus mira Koehne	Wild	Tibet, PRC	95.34	30.26	95.93	277	5.23	84.1	10530740	1316342500	125
popu6_sample21	Runa 1	Prunus mira Koehne	Wild	Tibet, PRC	95.6	30	94.11	284	4.93	84.9	9987802	1248475250	125
popu6_sample22	Tongmai 1	Prunus mira Koehne	Wild	Tibet, PRC	95.18	30	95.77	281	5.03	94.3	10177094	1272136750	125
popu6_sample23	Tongmai 2	Prunus mira Koehne	Wild	Tibet, PRC	95.18	30	95.62	286	4.9	91.3	9961762	1245220250	125
popu6_sample24	Paizhen 1	Prunus mira Koehne	Wild	Tibet, PRC	94.86	29.91	96.04	284	5.71	85.8	11541082	1442635250	125
popu6_sample25	Paizhen 2	Prunus mira Koehne	Wild	Tibet, PRC	94.86	29.9	96.69	277	5.29	84.9	10482262	1310282750	125
popu6_sample26	Paizhen 3	Prunus mira Koehne	Wild	Tibet, PRC	94.52	29.32	96.8	280	5.92	85.1	11714718	1464339750	125
popu6_sample27	Paizhen 4	Prunus mira Koehne	Wild	Tibet, PRC	94.52	29.32	96.09	273	5.69	85.9	11384498	1423062250	125
popu6_sample28	Daze 1	Prunus mira Koehne	Wild	Tibet, PRC	94.27	29.32	95.36	293	3.69	80.6	7403934	925491750	125
popu6_sample29	Daze 2	Prunus mira Koehne	Wild	Tibet, PRC	94.45	29.5	95.05	302	5.94	85.2	12335448	1541931000	125
popu6_sample30	Lanong 1	Prunus mira Koehne	Wild	Tibet, PRC	91.77	29.24	95.58	298	4.2	82	8436334	1054541750	125
popu6_sample31	Lanong 2	Prunus mira Koehne	Wild	Tibet, PRC	94.36	29.64	95.08	301	4.14	81.9	8292666	1036583250	125
popu6_sample32	Lanong 3	Prunus mira Koehne	Wild	Tibet, PRC	94.36	29.64	94.55	274	5.66	84.6	11612148	1451518500	125
popu6_sample33	Pabangka 1	Prunus mira Koehne	Wild	Tibet, PRC	91.124	29.72	94.33	293	4.44	83.2	9019648	1127456000	125
popu6_sample34	Pabangka 2	Prunus mira Koehne	Wild	Tibet, PRC	91.126	29.72	96.21	286	5.44	90.4	10867832	1358479000	125
popu6_sample35	Shannan Tibet	Prunus mira Koehne	Wild	Tibet, PRC	91.1	29.63	95.1	284	4.05	80.5	8392466	1049058250	125
popu6_sample36	2010 Tibet 15	Prunus mira Koehne	Wild	Tibet, PRC	94.401	29.623	96.99	277	4.29	82.5	8589280	1073660000	125
popu6_sample37	2010 Tibet 17	Prunus mira Koehne	Wild	Tibet, PRC	94.403	29.622	97.29	285	5	83.9	9740696	1217587000	125
popu6_sample38	2010 Tibet 26	Prunus mira Koehne	Wild	Tibet, PRC	94.548	29.472	96.95	297	4.43	83.5	8736090	1092011250	125
popu6_sample39	2010 Tibet 28	Prunus mira Koehne	Wild	Tibet, PRC	94.196	30.063	96.71	300	4.23	90	8250068	1031258500	125
popu6_sample40	2010 Tibet 29	Prunus mira Koehne	Wild	Tibet, PRC	94.197	30.063	97.35	293	4.56	93.4	8715176	1089397000	125
popu6_sample41	2010 Tibet 32	Prunus mira Koehne	Wild	Tibet, PRC	95.609	29.9	95.97	302	4.44	82.6	8868326	1108540750	125
popu6_sample42	2010 Tibet 54	Prunus mira Koehne	Wild	Tibet, PRC	89.7	29.33	96.01	295	4.28	81.9	8511858	1063982250	125
popu6_sample43	2010 Tibet 55	Prunus mira Koehne	Wild	Tibet, PRC	88.67	29.33	96.07	303	4.23	82.1	8419678	1052459750	125
popu6_sample44	2010 Tibet 57	Prunus mira Koehne	Wild	Tibet, PRC	88.67	29.37	95.21	292	4.43	81.7	9066218	1133277250	125
popu6_sample45	Hong Rou Guang He Tao	Prunus mira Koehne	Wild	Tibet, PRC	94.4	29.62	91.8	461	3.03	81.7	17641580	864437420	49
popu6_sample46	Qing Mao Zi Bai Hua	Prunus persica L.	Landrace	Sichuan, PRC	104.3	30.6	98.55	294	7.11	97.1	13276060	1659507500	125
popu7_sample1	Shi Tao	Prunus persica L.	Landrace	Guangxi, PRC	105.83	23.25	97.98	285	6.42	95.4	12124032	1515504000	125
popu7_sample2	Ying Ge Tao	Prunus persica L.	Landrace	Taiwan, PRC	121.5	25.01	93.95	478	2.78	88.8	15537532	761339068	49
popu7_sample3	Xian Tao	Prunus persica L.	Landrace	Guangxi, PRC	105.83	23.25	88.54	472	3.27	87.4	18061026	884990274	49
popu7_sample4	Nanshan Tian Tao	Prunus persica L.	Landrace	Guangdong, PRC	114.03	22.55	94.08	474	4.62	93.9	26890270	1317623230	49
popu7_sample5	Huang La Tao	Prunus persica L.	Landrace	Guangxi, PRC	107.02	24.56	98.13	304	6.25	94.9	11777224	1472153000	125
popu7_sample7	Nan Fang Zao Shu Tao	Prunus persica L.	Landrace	Guangdong, PRC	113.269	23.166	97.83	278	6.17	97.9	11657604	1457200500	125
popu7_sample8	Nan Fang Hong Hua Zao	Prunus persica L.	Landrace	Guangdong, PRC	113.25	23.25	94.53	294	6.62	95.3	13450120	1681265000	125
popu7_sample9	Gua Tao	Prunus persica L.	Landrace	Guangxi, PRC	105.83	23.25	97.92	303	6.06	95.3	11503374	1437921750	125
popu7_sample10	Lianhuashan 1	Prunus persica L.	Landrace	Guangdong, PRC	114.054	22.5576	94.96	485	7.73	87.7	15602674	1950334250	125
popu7_sample11	Lianhuashan 2	Prunus persica L.	Landrace	Guangdong, PRC	114.054	22.5575	96.89	534	10.49	95.4	20225058	2528132250	125
popu7_sample12	Lianhuashan 3	Prunus persica L.	Landrace	Guangdong, PRC	114.053	22.5571	95.97	497	8.88	89.9	17529946	2191243250	125
popu7_sample13	Lianhuashan 4	Prunus persica L.	Landrace	Guangdong, PRC	114.053	22.5572	95.96	531	8.14	94.5	15971876	1996484500	125
popu7_sample14	Wutongshan 1	Prunus persica L.	Landrace	Guangdong, PRC	114.203	22.5876	95.58	486	8.2	88.7	16198364	2024795500	125

## Sheet: Table S2
Table S2 The 18 SNP loci selected for validation by Sequenom MassARRAY
Chromosome	Position	Missing data	Consistent	Inconsistent	Accuracy (%)
Pp01	13090027	2	120	8	93.84
Pp01	36645183	14	105	11	90.52
Pp01	36645183	18	112	0	100
Pp02	17911562	10	117	3	97.5
Pp02	21512032	5	119	6	95.2
Pp02	24627681	4	118	8	93.65
Pp04	2040124	6	238	10	91.94
Pp04	10096595	4	124	2	98.41
Pp04	14047723	4	125	1	99.2
Pp05	541076	9	109	12	90.08
Pp05	17571575	1	126	3	97.6
Pp06	3024748	14	108	8	93.1
Pp06	24128826	7	112	11	91.81
Pp06	26924482	6	115	9	92.74
Pp07	8973642	4	126	0	100
Pp07	19262453	6	117	7	94.35
Pp06	29888797	6	124	0	100
Pp08	14171211	15	115	0	100
Average	N.A.	7.5	123.9	5.5	95.55

## Sheet: Table S3
Table S3 Environmental characteristic summary of the seven peach ecotypes.
Group	Environmental summary	Adaptive traita,b
YG group	Low latitude and high altitude (1,000-2,000 m), high annual precipitation ( > 1,500 mm), and acidic soil (Karst Landform, pH 4.5-5.5)	Early blooming, low chilling requirement (500-600 hours), resistance to acidic soil, small branch angle
NW group	Aridity (annual precipitation < 150 mm), extremely high temperature in summer (> 40 ℃) and extremely low temperature in winter (< -30℃), high diurnal temperature (> 15 ℃), long sunshine duration (2,700-3,500 h), and strong solar radiation	Yellow flesh, high sugar content, high drought resistance, high cold resistance, straight stone grain (Prunus ferganensis), leaf veins were straight out to the edge of leaf (Prunus ferganensis), lots of necatrine landraces
NP group	Moderate temperature and precipitation, high winter chill	Bigger fruit size, high chilling requirement (900~1200 hours)
YT group	High temperature (annual temperature 18 ℃), high precipitation (>1400 mm) and air humidity (average 70.3%)	High resistance to pathogens, open branch angle
NE group	High latitude and extremely low temperature (< -30 ℃)	High resistance to cold temperature, small fruit, late blooming
TB group	High altitude (> 4,500 m), hypoxic, extremely low temperature in winter and strong ultraviolet radiation (UV-B)	Smooth fruit stone, dark branch, red-colored annual shoot, epigeal germination, high resistance to UV-B and hypoxia.
ST group	Low latitude (< 23° N）, subtropical climate, and extremely low winter chill (annual minimum temperature > 8 ℃)	Low chilling requirement (< 400 hours), early blooming, late defoliation
aWang L, Zhu GR, Fang WC. 2012. Genetic diversity of Chinese peach landraces and elite landrace cultivars. Peach genetic resource in China. 201-212. China Agriculture Press, Beijing, China.
bWang Z, Zhuang E. 2001. Geographical distribution and cultivation regions of peach in China. Fruit trees of China, peach volume. 49-51. China Forestry Press, Beijing, China.

## Sheet: Table S4
Table S4 Selective sweeps in the seven peach groups.
Group	Chromosome	Start (bp)	End (bp)	Length (bp)
YG	Pp01	1190000	1192000	2000
YG	Pp01	1390000	1399999	9999
YG	Pp01	2066001	2099000	32999
YG	Pp01	2463001	2467000	3999
YG	Pp01	5500001	5509999	9998
YG	Pp01	10406001	10409000	2999
YG	Pp01	13990001	13999999	9998
YG	Pp01	15897001	15898000	999
YG	Pp01	16482001	16489999	7998
YG	Pp01	16500000	16509999	9999
YG	Pp01	17106001	17115000	8999
YG	Pp01	17315001	17319000	3999
YG	Pp01	17457001	17461000	3999
YG	Pp01	17491001	17497000	5999
YG	Pp01	17800000	17819999	19999
YG	Pp01	18008001	18013000	4999
YG	Pp01	19104001	19127000	22999
YG	Pp01	19140000	19149000	9000
YG	Pp01	20002001	20005000	2999
YG	Pp01	20070000	20079999	9999
YG	Pp01	28090000	28099999	9999
YG	Pp01	30189001	30193000	3999
YG	Pp01	34922001	34924000	1999
YG	Pp01	35199001	35199999	998
YG	Pp01	38305001	38306000	999
YG	Pp01	44363001	44376000	12999
YG	Pp01	44720000	44729999	9999
YG	Pp01	45070000	45076000	6000
YG	Pp01	47468001	47480000	11999
YG	Pp02	4100000	4104000	4000
YG	Pp02	4260000	4269999	9999
YG	Pp02	4880000	4902000	22000
YG	Pp02	5495001	5511000	15999
YG	Pp02	5560000	5579999	19999
YG	Pp02	6530000	6539999	9999
YG	Pp02	7337001	7339000	1999
YG	Pp02	7350000	7359999	9999
YG	Pp02	7370000	7379999	9999
YG	Pp02	7390000	7399999	9999
YG	Pp02	7405001	7406000	999
YG	Pp02	7413001	7428000	14999
YG	Pp02	7549001	7559000	9999
YG	Pp02	7617001	7621000	3999
YG	Pp02	8035001	8051000	15999
YG	Pp02	8730000	8733000	3000
YG	Pp02	8760000	8769999	9999
YG	Pp02	8820000	8849999	29999
YG	Pp02	8900000	8909999	9999
YG	Pp02	12600000	12609999	9999
YG	Pp02	12862001	12873000	10999
YG	Pp02	14366001	14372000	5999
YG	Pp02	14384001	14391000	6999
YG	Pp02	14468001	14486000	17999
YG	Pp02	14504001	14508000	3999
YG	Pp02	14520000	14529999	9999
YG	Pp02	14533001	14535000	1999
YG	Pp02	14690000	14698000	8000
YG	Pp02	14720000	14730000	10000
YG	Pp02	14734001	14739999	5998
YG	Pp02	14752001	14753000	999
YG	Pp02	14760000	14779999	19999
YG	Pp02	14830001	14840000	9999
YG	Pp02	16220000	16229999	9999
YG	Pp02	16298001	16303000	4999
YG	Pp02	17330000	17333000	3000
YG	Pp02	17480000	17483000	3000
YG	Pp02	17491001	17501000	9999
YG	Pp02	19315001	19319999	4998
YG	Pp02	21337001	21346000	8999
YG	Pp02	21420000	21439999	19999
YG	Pp02	22319001	22330000	10999
YG	Pp02	22377001	22399000	21999
YG	Pp02	22592001	22598000	5999
YG	Pp02	22619001	22620000	999
YG	Pp02	22644001	22653000	8999
YG	Pp02	22807001	22809000	1999
YG	Pp02	23510000	23519999	9999
YG	Pp02	23550000	23556000	6000
YG	Pp02	23558001	23559999	1998
YG	Pp02	24340000	24349999	9999
YG	Pp02	24485001	24495000	9999
YG	Pp02	24698001	24705000	6999
YG	Pp02	24830000	24838000	8000
YG	Pp02	24899001	24899999	998
YG	Pp02	25130000	25139999	9999
YG	Pp02	25580001	25596000	15999
YG	Pp02	25598001	25609999	11998
YG	Pp02	25637001	25639999	2998
YG	Pp02	25750000	25757000	7000
YG	Pp02	26840000	26845000	5000
YG	Pp02	26880000	26899000	19000
YG	Pp02	26985001	26989999	4998
YG	Pp02	27037001	27039999	2998
YG	Pp02	28223001	28229999	6998
YG	Pp02	28991001	28996000	4999
YG	Pp03	910000	917000	7000
YG	Pp03	5070000	5071000	1000
YG	Pp03	5083001	5089999	6998
YG	Pp03	6470001	6479000	8999
YG	Pp03	6503001	6509000	5999
YG	Pp03	6594001	6600000	5999
YG	Pp03	6633001	6642000	8999
YG	Pp03	6728001	6741000	12999
YG	Pp03	6748001	6761000	12999
YG	Pp03	6845001	6849999	4998
YG	Pp03	6857001	6872000	14999
YG	Pp03	6887001	6898000	10999
YG	Pp03	10160000	10169999	9999
YG	Pp03	10172001	10175000	2999
YG	Pp03	12767001	12781000	13999
YG	Pp03	12820000	12822000	2000
YG	Pp03	12918001	12919999	1998
YG	Pp03	12929001	12943000	13999
YG	Pp03	13280000	13289999	9999
YG	Pp03	13387001	13399000	11999
YG	Pp03	13507001	13519000	11999
YG	Pp03	13565001	13573000	7999
YG	Pp03	13574001	13583000	8999
YG	Pp03	15529001	15529999	998
YG	Pp03	15531001	15549999	18998
YG	Pp03	18530000	18533000	3000
YG	Pp03	19860000	19867000	7000
YG	Pp03	20039001	20039999	998
YG	Pp03	20670000	20673000	3000
YG	Pp03	20674001	20679999	5998
YG	Pp03	22408001	22417000	8999
YG	Pp03	24090000	24119999	29999
YG	Pp03	24149001	24154000	4999
YG	Pp03	26590000	26594000	4000
YG	Pp03	26920000	26926000	6000
YG	Pp04	138001	148000	9999
YG	Pp04	151001	153000	1999
YG	Pp04	1617001	1625000	7999
YG	Pp04	2183001	2193000	9999
YG	Pp04	2336001	2345000	8999
YG	Pp04	2376001	2385000	8999
YG	Pp04	2388001	2389000	999
YG	Pp04	2396001	2415000	18999
YG	Pp04	2428001	2443000	14999
YG	Pp04	2461001	2470000	8999
YG	Pp04	2878001	2907000	28999
YG	Pp04	2908001	2909999	1998
YG	Pp04	2910001	2919000	8999
YG	Pp04	2919001	2933000	13999
YG	Pp04	3016001	3019999	3998
YG	Pp04	3804001	3818000	13999
YG	Pp04	4340000	4344000	4000
YG	Pp04	4656001	4659999	3998
YG	Pp04	16954001	16959999	5998
YG	Pp04	16970000	16971000	1000
YG	Pp04	16976001	16979999	3998
YG	Pp04	17000000	17005000	5000
YG	Pp04	20777001	20779999	2998
YG	Pp04	24516001	24519999	3998
YG	Pp04	24930000	24934000	4000
YG	Pp05	4030001	4039999	9998
YG	Pp05	4195001	4199999	4998
YG	Pp05	4890000	4899999	9999
YG	Pp05	5340000	5347000	7000
YG	Pp05	11269001	11269999	998
YG	Pp05	14100000	14106000	6000
YG	Pp05	14970000	14982000	12000
YG	Pp05	16798001	16816000	17999
YG	Pp05	16834001	16845000	10999
YG	Pp05	17360000	17369999	9999
YG	Pp05	17890000	17899999	9999
YG	Pp06	1710000	1719999	9999
YG	Pp06	10170000	10179000	9000
YG	Pp06	17900000	17911000	11000
YG	Pp06	18130000	18149999	19999
YG	Pp06	18779001	18789000	9999
YG	Pp06	19800000	19809999	9999
YG	Pp06	20130000	20139000	9000
YG	Pp06	20489001	20489999	998
YG	Pp06	21080000	21091000	11000
YG	Pp06	21096001	21099999	3998
YG	Pp07	5646001	5655000	8999
YG	Pp07	5860001	5870000	9999
YG	Pp07	6204001	6218000	13999
YG	Pp07	6348001	6350000	1999
YG	Pp07	6655001	6665000	9999
YG	Pp07	6702001	6709999	7998
YG	Pp07	6782001	6789999	7998
YG	Pp07	6993001	6999999	6998
YG	Pp07	9364001	9379999	15998
YG	Pp08	3910000	3919999	9999
YG	Pp08	4730000	4739999	9999
YG	Pp08	17860000	17869999	9999
YG	Pp08	21410000	21419999	9999
NW	Pp01	200001	217000	16999
NW	Pp01	225001	240000	14999
NW	Pp01	276001	286000	9999
NW	Pp01	555001	565000	9999
NW	Pp01	1328001	1330000	1999
NW	Pp01	1875001	1880000	4999
NW	Pp01	2240001	2245000	4999
NW	Pp01	2396001	2410000	13999
NW	Pp01	2418001	2419000	999
NW	Pp01	3044001	3054000	9999
NW	Pp01	3589001	3599000	9999
NW	Pp01	3940000	3949999	9999
NW	Pp01	5073001	5083000	9999
NW	Pp01	5773001	5784000	10999
NW	Pp01	5789001	5798000	8999
NW	Pp01	5798001	5807000	8999
NW	Pp01	5856001	5864000	7999
NW	Pp01	5865001	5867000	1999
NW	Pp01	5873001	5875000	1999
NW	Pp01	5959001	5984000	24999
NW	Pp01	6293001	6305000	11999
NW	Pp01	6529001	6538000	8999
NW	Pp01	6538001	6547000	8999
NW	Pp01	6630001	6637000	6999
NW	Pp01	6640000	6643000	3000
NW	Pp01	6649001	6649999	998
NW	Pp01	7264001	7276000	11999
NW	Pp01	7690001	7701000	10999
NW	Pp01	7730001	7742000	11999
NW	Pp01	7815001	7817000	1999
NW	Pp01	8566001	8577000	10999
NW	Pp01	8597001	8611000	13999
NW	Pp01	8722001	8735000	12999
NW	Pp01	8736001	8756000	19999
NW	Pp01	9850001	9868000	17999
NW	Pp01	10821001	10832000	10999
NW	Pp01	11289001	11300000	10999
NW	Pp01	13584001	13585000	999
NW	Pp01	14182001	14189999	7998
NW	Pp01	17140000	17144000	4000
NW	Pp01	18753001	18763000	9999
NW	Pp01	19037001	19039999	2998
NW	Pp01	19943001	19953000	9999
NW	Pp01	20174001	20186000	11999
NW	Pp01	20384001	20394000	9999
NW	Pp01	20599001	20607000	7999
NW	Pp01	20630001	20635000	4999
NW	Pp01	20874001	20884000	9999
NW	Pp01	20963001	20976000	12999
NW	Pp01	21042001	21045000	2999
NW	Pp01	21092001	21106000	13999
NW	Pp01	21107001	21112000	4999
NW	Pp01	21114001	21124000	9999
NW	Pp01	21147001	21166000	18999
NW	Pp01	21384001	21393000	8999
NW	Pp01	21820000	21829999	9999
NW	Pp01	22030001	22042000	11999
NW	Pp01	22044001	22059000	14999
NW	Pp01	22152001	22165000	12999
NW	Pp01	22176001	22186000	9999
NW	Pp01	22195001	22210000	14999
NW	Pp01	23012001	23017000	4999
NW	Pp01	23753001	23762000	8999
NW	Pp01	24542001	24552000	9999
NW	Pp01	28653001	28665000	11999
NW	Pp01	29098001	29099999	1998
NW	Pp01	29112001	29119999	7998
NW	Pp01	29141001	29155000	13999
NW	Pp01	29670001	29681000	10999
NW	Pp01	29696001	29706000	9999
NW	Pp01	30176001	30185000	8999
NW	Pp01	33892001	33899999	7998
NW	Pp01	34021001	34022000	999
NW	Pp01	34716001	34729000	12999
NW	Pp01	34965001	34971000	5999
NW	Pp01	35049001	35086000	36999
NW	Pp01	35087001	35095000	7999
NW	Pp01	35104001	35115000	10999
NW	Pp01	35121001	35128000	6999
NW	Pp01	35146001	35155000	8999
NW	Pp01	35213001	35224000	10999
NW	Pp01	35252001	35253000	999
NW	Pp01	35300000	35308000	8000
NW	Pp01	35427001	35437000	9999
NW	Pp01	35797001	35810000	12999
NW	Pp01	36742001	36754000	11999
NW	Pp01	36820001	36822000	1999
NW	Pp01	36826001	36830000	3999
NW	Pp01	37092001	37094000	1999
NW	Pp01	37837001	37844000	6999
NW	Pp01	39105001	39109999	4998
NW	Pp01	40295001	40296000	999
NW	Pp01	40501001	40511000	9999
NW	Pp01	40606001	40622000	15999
NW	Pp01	41857001	41869000	11999
NW	Pp01	42865001	42876000	10999
NW	Pp01	44417001	44428000	10999
NW	Pp01	44662001	44673000	10999
NW	Pp01	44738001	44746000	7999
NW	Pp01	44960000	44961000	1000
NW	Pp02	1989001	1999000	9999
NW	Pp02	2320000	2321000	1000
NW	Pp02	2352001	2360000	7999
NW	Pp02	7338001	7339999	1998
NW	Pp02	7406001	7409000	2999
NW	Pp02	7416001	7420000	3999
NW	Pp02	11598001	11609000	10999
NW	Pp02	14505001	14530000	24999
NW	Pp02	14970000	14972000	2000
NW	Pp02	15650001	15664000	13999
NW	Pp02	16405001	16412000	6999
NW	Pp02	16422001	16424000	1999
NW	Pp02	16464001	16473000	8999
NW	Pp02	16760000	16766000	6000
NW	Pp02	16947001	16949999	2998
NW	Pp02	18776001	18788000	11999
NW	Pp02	19076001	19091000	14999
NW	Pp02	20320000	20322000	2000
NW	Pp02	20830000	20836000	6000
NW	Pp02	21076001	21086000	9999
NW	Pp02	21360000	21369999	9999
NW	Pp02	21393001	21394000	999
NW	Pp02	21400000	21404000	4000
NW	Pp02	22781001	22799000	17999
NW	Pp02	22868001	22874000	5999
NW	Pp02	22941001	22954000	12999
NW	Pp02	23141001	23145000	3999
NW	Pp02	23145001	23166000	20999
NW	Pp02	23265001	23279000	13999
NW	Pp02	23546001	23555000	8999
NW	Pp02	23562001	23567000	4999
NW	Pp02	23740001	23748000	7999
NW	Pp02	24384001	24387000	2999
NW	Pp02	24472001	24497000	24999
NW	Pp02	24501001	24515000	13999
NW	Pp02	24707001	24713000	5999
NW	Pp02	24717001	24727000	9999
NW	Pp02	24730001	24732000	1999
NW	Pp02	24737001	24748000	10999
NW	Pp02	24752001	24759000	6999
NW	Pp02	27258001	27268000	9999
NW	Pp02	28082001	28090000	7999
NW	Pp02	28266001	28267000	999
NW	Pp02	28272001	28282000	9999
NW	Pp02	28324001	28344000	19999
NW	Pp02	28474001	28483000	8999
NW	Pp02	28797001	28799999	2998
NW	Pp02	28944001	28956000	11999
NW	Pp02	28959001	28978000	18999
NW	Pp02	29210000	29214000	4000
NW	Pp03	223001	229000	5999
NW	Pp03	286001	294000	7999
NW	Pp03	296001	298000	1999
NW	Pp03	303001	314000	10999
NW	Pp03	853001	863000	9999
NW	Pp03	866001	872000	5999
NW	Pp03	873001	876000	2999
NW	Pp03	1156001	1160000	3999
NW	Pp03	1773001	1778000	4999
NW	Pp03	1907001	1910000	2999
NW	Pp03	1917001	1925000	7999
NW	Pp03	2385001	2394000	8999
NW	Pp03	2523001	2533000	9999
NW	Pp03	3832001	3839000	6999
NW	Pp03	5438001	5453000	14999
NW	Pp03	8365001	8375000	9999
NW	Pp03	14619001	14626000	6999
NW	Pp03	16388001	16389999	1998
NW	Pp03	18162001	18169000	6999
NW	Pp03	21718001	21726000	7999
NW	Pp03	21964001	21969999	5998
NW	Pp03	21988001	21998000	9999
NW	Pp03	22618001	22629000	10999
NW	Pp03	26590000	26594000	4000
NW	Pp03	26660000	26661000	1000
NW	Pp04	4340000	4344000	4000
NW	Pp04	4656001	4659999	3998
NW	Pp04	5172001	5179999	7998
NW	Pp04	5764001	5774000	9999
NW	Pp04	6520000	6529999	9999
NW	Pp04	8240001	8269000	28999
NW	Pp04	8327001	8332000	4999
NW	Pp04	8332001	8348000	15999
NW	Pp04	8349001	8371000	21999
NW	Pp04	11141001	11149000	7999
NW	Pp04	11197001	11222000	24999
NW	Pp04	11527001	11544000	16999
NW	Pp04	11964001	11993000	28999
NW	Pp04	11996001	12002000	5999
NW	Pp04	13506001	13517000	10999
NW	Pp04	13518001	13535000	16999
NW	Pp04	13994001	14005000	10999
NW	Pp04	14127001	14150000	22999
NW	Pp04	14543001	14554000	10999
NW	Pp04	17134001	17143000	8999
NW	Pp04	17295001	17311000	15999
NW	Pp04	17326001	17337000	10999
NW	Pp04	18063001	18075000	11999
NW	Pp04	18569001	18573000	3999
NW	Pp04	18973001	18985000	11999
NW	Pp04	20548001	20561000	12999
NW	Pp04	20755001	20765000	9999
NW	Pp04	20798001	20821000	22999
NW	Pp04	20824001	20845000	20999
NW	Pp04	20978001	20989000	10999
NW	Pp04	21065001	21105000	39999
NW	Pp04	21110001	21142000	31999
NW	Pp04	21174001	21184000	9999
NW	Pp04	21204001	21213000	8999
NW	Pp04	21278001	21279999	1998
NW	Pp04	22117001	22125000	7999
NW	Pp04	23389001	23399000	9999
NW	Pp04	23479001	23488000	8999
NW	Pp04	23528001	23542000	13999
NW	Pp04	23571001	23582000	10999
NW	Pp04	24142001	24154000	11999
NW	Pp05	1460000	1462000	2000
NW	Pp05	1879001	1892000	12999
NW	Pp05	2000000	2001000	1000
NW	Pp05	2044001	2049999	5998
NW	Pp05	3210000	3214000	4000
NW	Pp05	3374001	3377000	2999
NW	Pp05	4210000	4216000	6000
NW	Pp05	4220001	4229999	9998
NW	Pp05	4260000	4261000	1000
NW	Pp05	6283001	6295000	11999
NW	Pp05	6320001	6330000	9999
NW	Pp05	6814001	6817000	2999
NW	Pp05	7708001	7718000	9999
NW	Pp05	8053001	8068000	14999
NW	Pp05	8704001	8723000	18999
NW	Pp05	8878001	8889000	10999
NW	Pp05	9090000	9092000	2000
NW	Pp05	9120000	9122000	2000
NW	Pp05	9659001	9671000	11999
NW	Pp05	9919001	9925000	5999
NW	Pp05	10191001	10201000	9999
NW	Pp05	10317001	10324000	6999
NW	Pp05	10660001	10667000	6999
NW	Pp05	10948001	10958000	9999
NW	Pp05	10965001	10972000	6999
NW	Pp05	10997001	11004000	6999
NW	Pp05	11087001	11099000	11999
NW	Pp05	11158001	11159999	1998
NW	Pp05	11179001	11189000	9999
NW	Pp05	11250000	11259000	9000
NW	Pp05	11760001	11763000	2999
NW	Pp05	11782001	11792000	9999
NW	Pp05	12525001	12536000	10999
NW	Pp05	12560001	12579000	18999
NW	Pp05	12680001	12699000	18999
NW	Pp05	13698001	13699999	1998
NW	Pp05	15405001	15415000	9999
NW	Pp05	16540000	16545000	5000
NW	Pp05	17030000	17031000	1000
NW	Pp05	17184001	17196000	11999
NW	Pp05	17587001	17602000	14999
NW	Pp05	17729001	17742000	12999
NW	Pp05	17747001	17756000	8999
NW	Pp05	18088001	18103000	14999
NW	Pp05	18281001	18289000	7999
NW	Pp06	1245001	1251000	5999
NW	Pp06	1262001	1269000	6999
NW	Pp06	1733001	1744000	10999
NW	Pp06	1904001	1914000	9999
NW	Pp06	1936001	1963000	26999
NW	Pp06	4670000	4674000	4000
NW	Pp06	5119001	5131000	11999
NW	Pp06	5478001	5479999	1998
NW	Pp06	7230000	7233000	3000
NW	Pp06	8090000	8096000	6000
NW	Pp06	8107001	8119000	11999
NW	Pp06	8179001	8181000	1999
NW	Pp06	8208001	8221000	12999
NW	Pp06	8222001	8235000	12999
NW	Pp06	8490001	8499000	8999
NW	Pp06	8511001	8520000	8999
NW	Pp06	8534001	8535000	999
NW	Pp06	8543001	8544000	999
NW	Pp06	8660001	8670000	9999
NW	Pp06	8785001	8803000	17999
NW	Pp06	9455001	9461000	5999
NW	Pp06	13190000	13198000	8000
NW	Pp06	13451001	13464000	12999
NW	Pp06	16148001	16159000	10999
NW	Pp06	17296001	17299999	3998
NW	Pp06	17310000	17312000	2000
NW	Pp06	17614001	17616000	1999
NW	Pp06	20305001	20309999	4998
NW	Pp06	20627001	20637000	9999
NW	Pp06	20946001	20951000	4999
NW	Pp06	22817001	22819000	1999
NW	Pp06	22911001	22926000	14999
NW	Pp06	23043001	23062000	18999
NW	Pp06	24351001	24366000	14999
NW	Pp06	24394001	24405000	10999
NW	Pp06	24629001	24636000	6999
NW	Pp06	24661001	24667000	5999
NW	Pp06	25151001	25161000	9999
NW	Pp06	25189001	25201000	11999
NW	Pp06	25233001	25250000	16999
NW	Pp06	25330000	25331000	1000
NW	Pp06	25733001	25742000	8999
NW	Pp06	26236001	26241000	4999
NW	Pp06	28654001	28659000	4999
NW	Pp06	28693001	28702000	8999
NW	Pp06	28859001	28859999	998
NW	Pp06	29150000	29152000	2000
NW	Pp06	30556001	30567000	10999
NW	Pp07	400000	417000	17000
NW	Pp07	865001	875000	9999
NW	Pp07	888001	902000	13999
NW	Pp07	914001	934000	19999
NW	Pp07	1144001	1152000	7999
NW	Pp07	1171001	1201000	29999
NW	Pp07	1834001	1867000	32999
NW	Pp07	2237001	2239999	2998
NW	Pp07	3510000	3513000	3000
NW	Pp07	3576001	3597000	20999
NW	Pp07	4060000	4061000	1000
NW	Pp07	5430000	5438000	8000
NW	Pp07	5695001	5699999	4998
NW	Pp07	6044001	6054000	9999
NW	Pp07	6086001	6096000	9999
NW	Pp07	6142001	6152000	9999
NW	Pp07	6590000	6601000	11000
NW	Pp07	6640000	6642000	2000
NW	Pp07	8286001	8288000	1999
NW	Pp07	8733001	8736000	2999
NW	Pp07	8913001	8923000	9999
NW	Pp07	11623001	11633000	9999
NW	Pp07	12605001	12616000	10999
NW	Pp07	12650001	12660000	9999
NW	Pp07	13121001	13136000	14999
NW	Pp07	14380001	14387000	6999
NW	Pp07	14725001	14738000	12999
NW	Pp07	16005001	16013000	7999
NW	Pp07	16031001	16036000	4999
NW	Pp07	16822001	16826000	3999
NW	Pp07	16960001	16961000	999
NW	Pp07	16970001	16974000	3999
NW	Pp07	17059001	17059999	998
NW	Pp07	17300000	17309000	9000
NW	Pp07	17381001	17400000	18999
NW	Pp07	17407001	17422000	14999
NW	Pp07	17449001	17484000	34999
NW	Pp07	17559001	17569000	9999
NW	Pp07	18320000	18323000	3000
NW	Pp07	18929001	18950000	20999
NW	Pp07	20793001	20805000	11999
NW	Pp07	21078001	21088000	9999
NW	Pp08	1101001	1112000	10999
NW	Pp08	1113001	1123000	9999
NW	Pp08	1133001	1149000	15999
NW	Pp08	1154001	1164000	9999
NW	Pp08	1538001	1546000	7999
NW	Pp08	4421001	4429999	8998
NW	Pp08	5190000	5195000	5000
NW	Pp08	5273001	5274000	999
NW	Pp08	6150001	6164000	13999
NW	Pp08	6262001	6269999	7998
NW	Pp08	6368001	6369999	1998
NW	Pp08	8711001	8719000	7999
NW	Pp08	10875001	10879999	4998
NW	Pp08	12307001	12313000	5999
NW	Pp08	12336001	12341000	4999
NW	Pp08	12883001	12888000	4999
NW	Pp08	12891001	12900000	8999
NW	Pp08	13000000	13019999	19999
NW	Pp08	14121001	14128000	6999
NW	Pp08	14510000	14514000	4000
NW	Pp08	16453001	16483000	29999
NW	Pp08	16711001	16719000	7999
NW	Pp08	19570001	19572000	1999
NW	Pp08	20415001	20430000	14999
NW	Pp08	20431001	20445000	13999
NW	Pp08	20546001	20548000	1999
NW	Pp08	20561001	20573000	11999
NW	Pp08	20857001	20860000	2999
NW	Pp08	20895001	20904000	8999
NW	Pp08	21330001	21337000	6999
NW	Pp08	21441001	21452000	10999
NW	Pp08	21474001	21484000	9999
NW	Pp08	22285001	22289999	4998
NW	Pp08	22305001	22307000	1999
NW	Pp08	22307001	22318000	10999
NW	Pp08	22493001	22502000	8999
NP	Pp01	81001	90000	8999
NP	Pp01	96001	105000	8999
NP	Pp01	112001	128000	15999
NP	Pp01	175001	178000	2999
NP	Pp01	188001	203000	14999
NP	Pp01	1220000	1229999	9999
NP	Pp01	3947001	3949999	2998
NP	Pp01	5810001	5815000	4999
NP	Pp01	6454001	6462000	7999
NP	Pp01	6478001	6490000	11999
NP	Pp01	6570000	6572000	2000
NP	Pp01	6584001	6599999	15998
NP	Pp01	6627001	6635000	7999
NP	Pp01	8987001	8989000	1999
NP	Pp01	8989001	8998000	8999
NP	Pp01	9799001	9807000	7999
NP	Pp01	9850001	9860000	9999
NP	Pp01	10230000	10239000	9000
NP	Pp01	12880000	12899000	19000
NP	Pp01	12945001	12955000	9999
NP	Pp01	13644001	13654000	9999
NP	Pp01	13936001	13952000	15999
NP	Pp01	13969001	13979000	9999
NP	Pp01	13981001	13999999	18998
NP	Pp01	15635001	15643000	7999
NP	Pp01	16703001	16709999	6998
NP	Pp01	17140000	17145000	5000
NP	Pp01	17346001	17347000	999
NP	Pp01	17349001	17357000	7999
NP	Pp01	17457001	17462000	4999
NP	Pp01	17516001	17521000	4999
NP	Pp01	18753001	18754000	999
NP	Pp01	18762001	18764000	1999
NP	Pp01	19204001	19214000	9999
NP	Pp01	19939001	19949000	9999
NP	Pp01	19995001	20005000	9999
NP	Pp01	20390000	20399999	9999
NP	Pp01	21825001	21838000	12999
NP	Pp01	22820000	22829999	9999
NP	Pp01	22953001	22970000	16999
NP	Pp01	23060000	23069999	9999
NP	Pp01	23230000	23239999	9999
NP	Pp01	23290000	23294000	4000
NP	Pp01	24523001	24532000	8999
NP	Pp01	27993001	28018000	24999
NP	Pp01	28246001	28249999	3998
NP	Pp01	29323001	29349000	25999
NP	Pp01	29381001	29389000	7999
NP	Pp01	29394001	29405000	10999
NP	Pp01	29410001	29418000	7999
NP	Pp01	30570000	30576000	6000
NP	Pp01	31552001	31562000	9999
NP	Pp01	32950000	32954000	4000
NP	Pp01	35004001	35005000	999
NP	Pp01	35126001	35132000	5999
NP	Pp01	35198001	35203000	4999
NP	Pp01	35430000	35434000	4000
NP	Pp01	35925001	35926000	999
NP	Pp01	35956001	35957000	999
NP	Pp01	35958001	35966000	7999
NP	Pp01	36640000	36643000	3000
NP	Pp01	37360000	37361000	1000
NP	Pp01	37987001	37989999	2998
NP	Pp01	38532001	38551000	18999
NP	Pp01	38585001	38596000	10999
NP	Pp01	38891001	38914000	22999
NP	Pp01	39091001	39098000	6999
NP	Pp01	39100001	39102000	1999
NP	Pp01	39103001	39112000	8999
NP	Pp01	39825001	39829999	4998
NP	Pp01	40960000	40962000	2000
NP	Pp01	41718001	41719999	1998
NP	Pp01	41929001	41929999	998
NP	Pp01	42790000	42792000	2000
NP	Pp01	44342001	44353000	10999
NP	Pp01	44902001	44915000	12999
NP	Pp01	44948001	44949999	1998
NP	Pp01	44960000	44961000	1000
NP	Pp01	44999001	45002000	2999
NP	Pp01	45071001	45081000	9999
NP	Pp01	45149001	45153000	3999
NP	Pp01	45246001	45253000	6999
NP	Pp01	45414001	45419999	5998
NP	Pp01	47469001	47469999	998
NP	Pp01	47742001	47745000	2999
NP	Pp02	803001	829000	25999
NP	Pp02	831001	832000	999
NP	Pp02	845001	849000	3999
NP	Pp02	858001	859000	999
NP	Pp02	870001	879000	8999
NP	Pp02	886001	916000	29999
NP	Pp02	2660001	2724000	63999
NP	Pp02	2725001	2739000	13999
NP	Pp02	2741001	2769000	27999
NP	Pp02	3154001	3181000	26999
NP	Pp02	3215001	3231000	15999
NP	Pp02	3357001	3367000	9999
NP	Pp02	3394001	3404000	9999
NP	Pp02	3800000	3816000	16000
NP	Pp02	3842001	3849999	7998
NP	Pp02	3860000	3869999	9999
NP	Pp02	4410000	4414000	4000
NP	Pp02	9380000	9389999	9999
NP	Pp02	10040000	10049999	9999
NP	Pp02	10702001	10749999	47998
NP	Pp02	10820000	10829999	9999
NP	Pp02	14505001	14521000	15999
NP	Pp02	15654001	15664000	9999
NP	Pp02	17330000	17336000	6000
NP	Pp02	20443001	20467000	23999
NP	Pp02	20731001	20749000	17999
NP	Pp02	24620000	24621000	1000
NP	Pp03	1550000	1559000	9000
NP	Pp03	9480001	9489000	8999
NP	Pp03	9969001	9969999	998
NP	Pp03	11580000	11589000	9000
NP	Pp03	11880001	11889999	9998
NP	Pp03	11900000	11939999	39999
NP	Pp03	12843001	12849999	6998
NP	Pp03	12860000	12869999	9999
NP	Pp03	12923001	12930000	6999
NP	Pp03	13270000	13279999	9999
NP	Pp03	13290000	13299999	9999
NP	Pp03	13401001	13419999	18998
NP	Pp03	13493001	13509999	16998
NP	Pp03	13520000	13529999	9999
NP	Pp03	13550000	13599999	49999
NP	Pp03	13650000	13654000	4000
NP	Pp03	14203001	14214000	10999
NP	Pp03	14818001	14829999	11998
NP	Pp03	14890000	14898000	8000
NP	Pp03	15080001	15089999	9998
NP	Pp03	17390000	17399999	9999
NP	Pp03	17480001	17496000	15999
NP	Pp03	19370000	19384000	14000
NP	Pp03	19710001	19723000	12999
NP	Pp03	19859001	19867000	7999
NP	Pp03	19877001	19882000	4999
NP	Pp03	22832001	22836000	3999
NP	Pp03	23217001	23224000	6999
NP	Pp03	23351001	23353000	1999
NP	Pp03	23388001	23393000	4999
NP	Pp03	23563001	23570000	6999
NP	Pp03	23594001	23602000	7999
NP	Pp03	23619001	23621000	1999
NP	Pp03	24140001	24145000	4999
NP	Pp03	24300000	24319999	19999
NP	Pp03	24370000	24379999	9999
NP	Pp03	25956001	25961000	4999
NP	Pp03	26551001	26553000	1999
NP	Pp03	26561001	26562000	999
NP	Pp03	26645001	26652000	6999
NP	Pp03	26728001	26736000	7999
NP	Pp03	26741001	26748000	6999
NP	Pp03	26886001	26908000	21999
NP	Pp04	2517001	2518000	999
NP	Pp04	2839001	2840000	999
NP	Pp04	2928001	2941000	12999
NP	Pp04	3016001	3019999	3998
NP	Pp04	3116001	3128000	11999
NP	Pp04	3245001	3263000	17999
NP	Pp04	3560000	3561000	1000
NP	Pp04	6710000	6717000	7000
NP	Pp04	6876001	6879999	3998
NP	Pp04	12869001	12869999	998
NP	Pp04	13030000	13034000	4000
NP	Pp04	14251001	14259999	8998
NP	Pp04	16318001	16339999	21998
NP	Pp04	19590000	19593000	3000
NP	Pp04	19764001	19775000	10999
NP	Pp04	20325001	20329999	4998
NP	Pp04	20353001	20365000	11999
NP	Pp04	20374001	20384000	9999
NP	Pp04	20726001	20729999	3998
NP	Pp04	20798001	20803000	4999
NP	Pp04	20813001	20823000	9999
NP	Pp04	20828001	20837000	8999
NP	Pp04	20961001	20969999	8998
NP	Pp04	20990000	20992000	2000
NP	Pp04	21022001	21035000	12999
NP	Pp04	21084001	21104000	19999
NP	Pp04	21113001	21128000	14999
NP	Pp04	21147001	21156000	8999
NP	Pp04	21663001	21669999	6998
NP	Pp04	21935001	21945000	9999
NP	Pp04	22066001	22077000	10999
NP	Pp04	22791001	22799999	8998
NP	Pp04	23080000	23085000	5000
NP	Pp04	23089001	23109999	20998
NP	Pp04	23140000	23187000	47000
NP	Pp04	23193001	23229999	36998
NP	Pp04	23240000	23279000	39000
NP	Pp04	23288001	23289999	1998
NP	Pp04	23300000	23342000	42000
NP	Pp04	23370000	23379000	9000
NP	Pp04	23400000	23404000	4000
NP	Pp04	23419001	23433000	13999
NP	Pp04	23433001	23461000	27999
NP	Pp04	23461001	23469999	8998
NP	Pp04	23480001	23490000	9999
NP	Pp04	23580000	23587000	7000
NP	Pp04	24222001	24232000	9999
NP	Pp04	25516001	25519999	3998
NP	Pp05	620000	623000	3000
NP	Pp05	644001	659000	14999
NP	Pp05	706001	710000	3999
NP	Pp05	815001	830000	14999
NP	Pp05	1171001	1181000	9999
NP	Pp05	1256001	1258000	1999
NP	Pp05	1264001	1270000	5999
NP	Pp05	1286001	1293000	6999
NP	Pp05	1303001	1317000	13999
NP	Pp05	1330000	1339999	9999
NP	Pp05	1393001	1401000	7999
NP	Pp05	1457001	1468000	10999
NP	Pp05	1840000	1849999	9999
NP	Pp05	1880000	1889999	9999
NP	Pp05	1940000	1949999	9999
NP	Pp05	2703001	2714000	10999
NP	Pp05	3293001	3301000	7999
NP	Pp05	5600000	5607000	7000
NP	Pp05	6182001	6189999	7998
NP	Pp05	6281001	6291000	9999
NP	Pp05	8526001	8536000	9999
NP	Pp05	13599001	13602000	2999
NP	Pp05	13602001	13616000	13999
NP	Pp05	14243001	14250000	6999
NP	Pp05	14340000	14343000	3000
NP	Pp05	15380000	15389999	9999
NP	Pp06	2316001	2327000	10999
NP	Pp06	4399001	4410000	10999
NP	Pp06	5310000	5319999	9999
NP	Pp06	5360001	5369000	8999
NP	Pp06	5587001	5597000	9999
NP	Pp06	5603001	5614000	10999
NP	Pp06	6068001	6071000	2999
NP	Pp06	10220001	10229999	9998
NP	Pp06	14990000	15009999	19999
NP	Pp06	17859001	17859999	998
NP	Pp06	24050000	24059999	9999
NP	Pp06	24620001	24626000	5999
NP	Pp06	24628001	24634000	5999
NP	Pp06	24691001	24694000	2999
NP	Pp06	24698001	24702000	3999
NP	Pp06	24708001	24716000	7999
NP	Pp06	25040001	25054000	13999
NP	Pp06	25310000	25311000	1000
NP	Pp06	25453001	25461000	7999
NP	Pp06	28840000	28846000	6000
NP	Pp06	28859001	28859999	998
NP	Pp06	29200000	29206000	6000
NP	Pp07	401001	417000	15999
NP	Pp07	5662001	5676000	13999
NP	Pp07	5678001	5698000	19999
NP	Pp07	5790001	5800000	9999
NP	Pp07	8383001	8387000	3999
NP	Pp07	8565001	8574000	8999
NP	Pp07	8861001	8864000	2999
NP	Pp07	9820000	9824000	4000
NP	Pp07	9833001	9851000	17999
NP	Pp07	9852001	9862000	9999
NP	Pp07	10051001	10056000	4999
NP	Pp07	10655001	10659999	4998
NP	Pp07	14428001	14429999	1998
NP	Pp07	16134001	16138000	3999
NP	Pp07	16153001	16155000	1999
NP	Pp07	16180001	16193000	12999
NP	Pp07	16195001	16219000	23999
NP	Pp07	16248001	16257000	8999
NP	Pp07	16262001	16272000	9999
NP	Pp07	16273001	16286000	12999
NP	Pp07	16287001	16298000	10999
NP	Pp07	16300001	16311000	10999
NP	Pp07	16331001	16335000	3999
NP	Pp07	16343001	16344000	999
NP	Pp07	16535001	16551000	15999
NP	Pp07	16557001	16559000	1999
NP	Pp07	16610001	16613000	2999
NP	Pp07	16648001	16656000	7999
NP	Pp07	17004001	17009000	4999
NP	Pp07	17055001	17063000	7999
NP	Pp07	17898001	17902000	3999
NP	Pp07	18692001	18702000	9999
NP	Pp07	18733001	18739000	5999
NP	Pp07	18815001	18818000	2999
NP	Pp07	19273001	19280000	6999
NP	Pp07	20670000	20678000	8000
NP	Pp08	1060000	1089999	29999
NP	Pp08	1108001	1109999	1998
NP	Pp08	3903001	3919000	15999
NP	Pp08	4990000	4999999	9999
NP	Pp08	5790000	5793000	3000
NP	Pp08	6149001	6149999	998
NP	Pp08	6262001	6272000	9999
NP	Pp08	15239001	15247000	7999
NP	Pp08	15414001	15427000	12999
NP	Pp08	15429001	15437000	7999
NP	Pp08	19840000	19849999	9999
NP	Pp08	20678001	20679999	1998
NP	Pp08	22162001	22173000	10999
NP	Pp08	22285001	22289999	4998
YT	Pp01	1219001	1229000	9999
YT	Pp01	1280001	1290000	9999
YT	Pp01	2990000	2992000	2000
YT	Pp01	7090000	7093000	3000
YT	Pp01	7598001	7602000	3999
YT	Pp01	10827001	10829999	2998
YT	Pp01	11410000	11414000	4000
YT	Pp01	12170000	12178000	8000
YT	Pp01	12179001	12191000	11999
YT	Pp01	13499001	13513000	13999
YT	Pp01	13608001	13624000	15999
YT	Pp01	13720000	13721000	1000
YT	Pp01	17349001	17352000	2999
YT	Pp01	17601001	17629999	28998
YT	Pp01	18667001	18669999	2998
YT	Pp01	19038001	19039999	1998
YT	Pp01	20070000	20079999	9999
YT	Pp01	20129001	20129999	998
YT	Pp01	32027001	32031000	3999
YT	Pp02	301001	304000	2999
YT	Pp02	3050001	3058000	7999
YT	Pp02	4810000	4824000	14000
YT	Pp02	5213001	5222000	8999
YT	Pp02	6163001	6169999	6998
YT	Pp02	6841001	6851000	9999
YT	Pp02	7550000	7560000	10000
YT	Pp02	7852001	7855000	2999
YT	Pp02	8561001	8569999	8998
YT	Pp02	11212001	11222000	9999
YT	Pp02	11223001	11226000	2999
YT	Pp02	12380000	12389999	9999
YT	Pp02	12513001	12529000	15999
YT	Pp02	12732001	12740000	7999
YT	Pp02	13102001	13109999	7998
YT	Pp02	13561001	13569999	8998
YT	Pp02	13580000	13592000	12000
YT	Pp02	13943001	13966000	22999
YT	Pp02	14956001	14970000	13999
YT	Pp02	15347001	15356000	8999
YT	Pp02	15517001	15525000	7999
YT	Pp02	15970000	15976000	6000
YT	Pp02	16101001	16109999	8998
YT	Pp02	17020000	17030000	10000
YT	Pp02	18305001	18307000	1999
YT	Pp02	18775001	18778000	2999
YT	Pp02	18850001	18860000	9999
YT	Pp02	19710000	19717000	7000
YT	Pp02	20718001	20719999	1998
YT	Pp02	20817001	20819999	2998
YT	Pp03	817001	829999	12998
YT	Pp03	1643001	1657000	13999
YT	Pp03	6521001	6539000	17999
YT	Pp03	6876001	6882000	5999
YT	Pp03	6883001	6893000	9999
YT	Pp03	7343001	7357000	13999
YT	Pp03	7358001	7366000	7999
YT	Pp03	7383001	7396000	12999
YT	Pp03	7403001	7405000	1999
YT	Pp03	7564001	7569999	5998
YT	Pp03	8010001	8025000	14999
YT	Pp03	8028001	8029999	1998
YT	Pp03	9555001	9564000	8999
YT	Pp03	9570001	9571000	999
YT	Pp03	9806001	9809999	3998
YT	Pp03	9820000	9829999	9999
YT	Pp03	9840000	9846000	6000
YT	Pp03	10002001	10006000	3999
YT	Pp03	10150000	10151000	1000
YT	Pp03	12166001	12176000	9999
YT	Pp03	12190000	12199999	9999
YT	Pp03	12440001	12454000	13999
YT	Pp03	14943001	14952000	8999
YT	Pp03	15750000	15756000	6000
YT	Pp03	21722001	21734000	11999
YT	Pp03	21736001	21746000	9999
YT	Pp03	21965001	21969999	4998
YT	Pp03	22577001	22578000	999
YT	Pp03	22583001	22587000	3999
YT	Pp03	23424001	23432000	7999
YT	Pp04	2816001	2819000	2999
YT	Pp04	4540000	4549999	9999
YT	Pp04	8080000	8086000	6000
YT	Pp04	8160000	8161000	1000
YT	Pp04	8540000	8543000	3000
YT	Pp04	9850001	9859000	8999
YT	Pp04	9890000	9899999	9999
YT	Pp04	9948001	9967000	18999
YT	Pp04	10090000	10099999	9999
YT	Pp04	11200000	11201000	1000
YT	Pp04	11995001	11999999	4998
YT	Pp04	12081001	12091000	9999
YT	Pp04	12124001	12135000	10999
YT	Pp04	12276001	12283000	6999
YT	Pp04	12890000	12899000	9000
YT	Pp04	13138001	13139000	999
YT	Pp04	13160000	13167000	7000
YT	Pp04	13179001	13179999	998
YT	Pp04	13600000	13609999	9999
YT	Pp04	13818001	13823000	4999
YT	Pp04	14145001	14152000	6999
YT	Pp04	14316001	14329999	13998
YT	Pp04	14330001	14333000	2999
YT	Pp04	14350000	14352000	2000
YT	Pp04	14353001	14359999	6998
YT	Pp04	14492001	14499000	6999
YT	Pp04	14536001	14537000	999
YT	Pp04	14586001	14604000	17999
YT	Pp04	14701001	14705000	3999
YT	Pp04	14714001	14718000	3999
YT	Pp04	15049001	15050000	999
YT	Pp04	15051001	15059000	7999
YT	Pp04	15168001	15173000	4999
YT	Pp04	15716001	15721000	4999
YT	Pp04	16119001	16127000	7999
YT	Pp04	16149001	16157000	7999
YT	Pp04	16291001	16299000	7999
YT	Pp04	16428001	16432000	3999
YT	Pp04	17334001	17345000	10999
YT	Pp04	17804001	17809999	5998
YT	Pp04	18452001	18457000	4999
YT	Pp04	20380000	20389999	9999
YT	Pp04	20470000	20479999	9999
YT	Pp04	21037001	21042000	4999
YT	Pp04	21836001	21839999	3998
YT	Pp04	22500000	22509999	9999
YT	Pp04	23490001	23492000	1999
YT	Pp04	24131001	24141000	9999
YT	Pp04	24141001	24149000	7999
YT	Pp04	24296001	24305000	8999
YT	Pp05	347001	355000	7999
YT	Pp05	1415001	1419999	4998
YT	Pp05	2070000	2076000	6000
YT	Pp05	2299001	2306000	6999
YT	Pp05	2488001	2500000	11999
YT	Pp05	2515001	2527000	11999
YT	Pp05	2549001	2555000	5999
YT	Pp05	2575001	2581000	5999
YT	Pp05	2597001	2601000	3999
YT	Pp05	2731001	2741000	9999
YT	Pp05	2855001	2864000	8999
YT	Pp05	4062001	4067000	4999
YT	Pp05	4146001	4150000	3999
YT	Pp05	4546001	4549999	3998
YT	Pp05	5534001	5542000	7999
YT	Pp05	7845001	7849999	4998
YT	Pp05	7863001	7869999	6998
YT	Pp05	8350000	8358000	8000
YT	Pp05	8400001	8408000	7999
YT	Pp05	8512001	8524000	11999
YT	Pp05	8530001	8546000	15999
YT	Pp05	8583001	8598000	14999
YT	Pp05	8606001	8617000	10999
YT	Pp05	8750000	8753000	3000
YT	Pp05	10058001	10059999	1998
YT	Pp05	10150001	10156000	5999
YT	Pp05	10367001	10376000	8999
YT	Pp05	10850000	10859000	9000
YT	Pp05	10896001	10899999	3998
YT	Pp05	14880000	14886000	6000
YT	Pp05	17280000	17286000	6000
YT	Pp05	17340000	17349000	9000
YT	Pp06	1940001	1957000	16999
YT	Pp06	3990000	3991000	1000
YT	Pp06	5623001	5639000	15999
YT	Pp06	5640001	5642000	1999
YT	Pp06	7210000	7211000	1000
YT	Pp06	7870000	7887000	17000
YT	Pp06	7900000	7902000	2000
YT	Pp06	10956001	10969000	12999
YT	Pp06	11058001	11065000	6999
YT	Pp06	11071001	11077000	5999
YT	Pp06	11103001	11111000	7999
YT	Pp06	11118001	11128000	9999
YT	Pp06	11132001	11144000	11999
YT	Pp06	11274001	11289000	14999
YT	Pp06	12113001	12123000	9999
YT	Pp06	12472001	12479999	7998
YT	Pp06	12554001	12564000	9999
YT	Pp06	25890000	25898000	8000
YT	Pp07	404001	409999	5998
YT	Pp07	1611001	1625000	13999
YT	Pp07	1761001	1780000	18999
YT	Pp07	1818001	1838000	19999
YT	Pp07	1845001	1858000	12999
YT	Pp07	1888001	1897000	8999
YT	Pp07	1999001	2008000	8999
YT	Pp07	2103001	2130000	26999
YT	Pp07	2236001	2242000	5999
YT	Pp07	2252001	2258000	5999
YT	Pp07	3634001	3644000	9999
YT	Pp07	3677001	3678000	999
YT	Pp07	3912001	3922000	9999
YT	Pp07	3941001	3951000	9999
YT	Pp07	4293001	4312000	18999
YT	Pp07	4414001	4423000	8999
YT	Pp07	6155001	6161000	5999
YT	Pp07	6640000	6641000	1000
YT	Pp07	6909001	6923000	13999
YT	Pp07	6927001	6928000	999
YT	Pp07	6931001	6937000	5999
YT	Pp07	7126001	7135000	8999
YT	Pp07	7512001	7539999	27998
YT	Pp07	8607001	8616000	8999
YT	Pp07	8717001	8728000	10999
YT	Pp07	8729001	8733000	3999
YT	Pp07	8765001	8792000	26999
YT	Pp07	8799001	8806000	6999
YT	Pp07	8852001	8861000	8999
YT	Pp07	9442001	9451000	8999
YT	Pp07	10051001	10054000	2999
YT	Pp07	10377001	10389999	12998
YT	Pp07	11530000	11533000	3000
YT	Pp07	21078001	21079999	1998
YT	Pp07	21156001	21159999	3998
YT	Pp07	21210000	21214000	4000
YT	Pp07	21408001	21409999	1998
YT	Pp07	21931001	21939000	7999
YT	Pp08	526001	529999	3998
YT	Pp08	597001	599999	2998
YT	Pp08	5684001	5690000	5999
YT	Pp08	6253001	6259999	6998
YT	Pp08	6318001	6319999	1998
YT	Pp08	8828001	8829999	1998
YT	Pp08	10470000	10479999	9999
YT	Pp08	12171001	12178000	6999
YT	Pp08	14501001	14523000	21999
YT	Pp08	15592001	15607000	14999
YT	Pp08	16408001	16409999	1998
YT	Pp08	16575001	16579999	4998
YT	Pp08	17920000	17923000	3000
YT	Pp08	18157001	18159999	2998
YT	Pp08	18588001	18589999	1998
YT	Pp08	19146001	19149999	3998
YT	Pp08	20120001	20127000	6999
YT	Pp08	20259001	20261000	1999
NE	Pp01	686001	689999	3998
NE	Pp01	723001	729999	6998
NE	Pp01	1220001	1229999	9998
NE	Pp01	2028001	2037000	8999
NE	Pp01	3818001	3824000	5999
NE	Pp01	3861001	3872000	10999
NE	Pp01	4120000	4129999	9999
NE	Pp01	4235001	4239999	4998
NE	Pp01	4323001	4330000	6999
NE	Pp01	6630000	6634000	4000
NE	Pp01	8608001	8625000	16999
NE	Pp01	9228001	9229999	1998
NE	Pp01	9238001	9240000	1999
NE	Pp01	9849001	9849999	998
NE	Pp01	11070000	11073000	3000
NE	Pp01	11076001	11079999	3998
NE	Pp01	12339001	12352000	12999
NE	Pp01	12732001	12742000	9999
NE	Pp01	15170001	15171000	999
NE	Pp01	15253001	15259999	6998
NE	Pp01	15890000	15891000	1000
NE	Pp01	15897001	15899999	2998
NE	Pp01	16620001	16623000	2999
NE	Pp01	17457001	17458000	999
NE	Pp01	17480000	17488000	8000
NE	Pp01	17536001	17547000	10999
NE	Pp01	17554001	17555000	999
NE	Pp01	18770000	18787000	17000
NE	Pp01	19470000	19474000	4000
NE	Pp01	20174001	20175000	999
NE	Pp01	21740000	21749999	9999
NE	Pp01	21790000	21799999	9999
NE	Pp01	31034001	31035000	999
NE	Pp01	31087001	31092000	4999
NE	Pp01	37335001	37339999	4998
NE	Pp01	37360000	37361000	1000
NE	Pp01	37499001	37516000	16999
NE	Pp01	37560001	37577000	16999
NE	Pp01	37583001	37594000	10999
NE	Pp01	37629001	37636000	6999
NE	Pp01	37642001	37672000	29999
NE	Pp01	37717001	37731000	13999
NE	Pp01	37768001	37783000	14999
NE	Pp01	37784001	37790000	5999
NE	Pp01	37824001	37842000	17999
NE	Pp01	44361001	44380000	18999
NE	Pp01	44739001	44746000	6999
NE	Pp01	44923001	44934000	10999
NE	Pp01	44978001	44980000	1999
NE	Pp01	45006001	45020000	13999
NE	Pp02	3845001	3849999	4998
NE	Pp02	7049001	7049999	998
NE	Pp02	8573001	8582000	8999
NE	Pp02	10532001	10539999	7998
NE	Pp02	13650000	13657000	7000
NE	Pp02	16163001	16171000	7999
NE	Pp02	17300001	17303000	2999
NE	Pp02	17333001	17346000	12999
NE	Pp02	17349001	17375000	25999
NE	Pp02	19872001	19882000	9999
NE	Pp02	19904001	19911000	6999
NE	Pp02	24743001	24757000	13999
NE	Pp02	24758001	24759000	999
NE	Pp02	25518001	25519999	1998
NE	Pp02	30050000	30069999	19999
NE	Pp03	912001	928000	15999
NE	Pp03	1404001	1414000	9999
NE	Pp03	4740000	4743000	3000
NE	Pp03	4830000	4836000	6000
NE	Pp03	6010000	6016000	6000
NE	Pp03	7142001	7160000	17999
NE	Pp03	7230001	7234000	3999
NE	Pp03	7584001	7599999	15998
NE	Pp03	7611001	7621000	9999
NE	Pp03	7640000	7649000	9000
NE	Pp03	7695001	7699999	4998
NE	Pp03	7700001	7705000	4999
NE	Pp03	7889001	7900000	10999
NE	Pp03	8243001	8249000	5999
NE	Pp03	8305001	8321000	15999
NE	Pp03	8687001	8690000	2999
NE	Pp03	8720000	8721000	1000
NE	Pp03	11953001	11962000	8999
NE	Pp03	13510001	13519000	8999
NE	Pp03	13543001	13552000	8999
NE	Pp03	14269001	14285000	15999
NE	Pp03	14286001	14288000	1999
NE	Pp03	14322001	14326000	3999
NE	Pp03	14452001	14463000	10999
NE	Pp03	14904001	14909999	5998
NE	Pp03	15205001	15208000	2999
NE	Pp03	15650000	15659999	9999
NE	Pp03	15810000	15816000	6000
NE	Pp03	16953001	16954000	999
NE	Pp03	17075001	17079000	3999
NE	Pp03	17097001	17099999	2998
NE	Pp03	17210000	17215000	5000
NE	Pp03	17217001	17219999	2998
NE	Pp03	17221001	17232000	10999
NE	Pp03	17250001	17259999	9998
NE	Pp03	17290000	17309999	19999
NE	Pp03	17794001	17809999	15998
NE	Pp03	21300000	21303000	3000
NE	Pp03	22000000	22005000	5000
NE	Pp03	22278001	22279999	1998
NE	Pp03	22362001	22381000	18999
NE	Pp03	22995001	23003000	7999
NE	Pp03	23006001	23012000	5999
NE	Pp03	23834001	23846000	11999
NE	Pp04	365001	367000	1999
NE	Pp04	3935001	3937000	1999
NE	Pp04	4908001	4909999	1998
NE	Pp04	5199001	5214000	14999
NE	Pp04	5240001	5247000	6999
NE	Pp04	5334001	5337000	2999
NE	Pp04	5362001	5368000	5999
NE	Pp04	5967001	5973000	5999
NE	Pp04	5985001	6002000	16999
NE	Pp04	6006001	6017000	10999
NE	Pp04	6960000	6963000	3000
NE	Pp04	7054001	7060000	5999
NE	Pp04	7182001	7194000	11999
NE	Pp04	7313001	7346000	32999
NE	Pp04	7364001	7377000	12999
NE	Pp04	7381001	7382000	999
NE	Pp04	7391001	7397000	5999
NE	Pp04	7412001	7422000	9999
NE	Pp04	8820001	8822000	1999
NE	Pp04	10854001	10866000	11999
NE	Pp04	10899001	10909000	9999
NE	Pp04	10946001	10977000	30999
NE	Pp04	11555001	11556000	999
NE	Pp04	12702001	12709999	7998
NE	Pp04	12803001	12804000	999
NE	Pp04	12820001	12823000	2999
NE	Pp04	13060001	13063000	2999
NE	Pp04	13643001	13650000	6999
NE	Pp04	14093001	14112000	18999
NE	Pp04	14113001	14122000	8999
NE	Pp04	14956001	14985000	28999
NE	Pp04	14996001	15007000	10999
NE	Pp04	15015001	15026000	10999
NE	Pp04	15052001	15071000	18999
NE	Pp04	15129001	15141000	11999
NE	Pp04	15161001	15172000	10999
NE	Pp04	15182001	15184000	1999
NE	Pp04	15549001	15552000	2999
NE	Pp04	15717001	15738000	20999
NE	Pp04	15753001	15762000	8999
NE	Pp04	15783001	15788000	4999
NE	Pp04	15821001	15832000	10999
NE	Pp04	16140001	16151000	10999
NE	Pp04	16183001	16201000	17999
NE	Pp04	16220001	16232000	11999
NE	Pp04	16233001	16235000	1999
NE	Pp04	17471001	17475000	3999
NE	Pp04	17492001	17495000	2999
NE	Pp04	19210000	19212000	2000
NE	Pp04	19226001	19229999	3998
NE	Pp04	19493001	19509000	15999
NE	Pp04	19567001	19586000	18999
NE	Pp04	19601001	19611000	9999
NE	Pp04	19624001	19635000	10999
NE	Pp04	20229001	20240000	10999
NE	Pp04	20334001	20344000	9999
NE	Pp04	20353001	20367000	13999
NE	Pp04	20900000	20909999	9999
NE	Pp04	20981001	20993000	11999
NE	Pp04	21106001	21119000	12999
NE	Pp04	21208001	21226000	17999
NE	Pp04	21344001	21350000	5999
NE	Pp04	21466001	21473000	6999
NE	Pp04	21694001	21698000	3999
NE	Pp04	22160001	22163000	2999
NE	Pp04	22505001	22509000	3999
NE	Pp04	23067001	23084000	16999
NE	Pp04	23229001	23245000	15999
NE	Pp04	23283001	23285000	1999
NE	Pp04	23290001	23294000	3999
NE	Pp05	4636001	4643000	6999
NE	Pp05	6176001	6184000	7999
NE	Pp05	8594001	8600000	5999
NE	Pp05	8601001	8609000	7999
NE	Pp05	8647001	8661000	13999
NE	Pp05	11021001	11026000	4999
NE	Pp05	11149001	11161000	11999
NE	Pp05	13508001	13509999	1998
NE	Pp05	13995001	13996000	999
NE	Pp05	16245001	16249999	4998
NE	Pp06	1388001	1390000	1999
NE	Pp06	1392001	1426000	33999
NE	Pp06	1728001	1751000	22999
NE	Pp06	2150000	2151000	1000
NE	Pp06	2153001	2159999	6998
NE	Pp06	2170000	2173000	3000
NE	Pp06	2685001	2689000	3999
NE	Pp06	2700001	2710000	9999
NE	Pp06	2720001	2733000	12999
NE	Pp06	2957001	2967000	9999
NE	Pp06	3316001	3319999	3998
NE	Pp06	5822001	5830000	7999
NE	Pp06	7880000	7888000	8000
NE	Pp06	8518001	8520000	1999
NE	Pp06	9216001	9226000	9999
NE	Pp06	9246001	9267000	20999
NE	Pp06	9356001	9362000	5999
NE	Pp06	9422001	9429999	7998
NE	Pp06	9793001	9794000	999
NE	Pp06	9814001	9815000	999
NE	Pp06	10064001	10069000	4999
NE	Pp06	10508001	10517000	8999
NE	Pp06	11520000	11529999	9999
NE	Pp06	11996001	12003000	6999
NE	Pp06	12016001	12034000	17999
NE	Pp06	12050001	12052000	1999
NE	Pp06	12079001	12097000	17999
NE	Pp06	12311001	12312000	999
NE	Pp06	13750000	13759999	9999
NE	Pp06	13790000	13795000	5000
NE	Pp06	14128001	14130000	1999
NE	Pp06	18740000	18746000	6000
NE	Pp06	20019001	20019999	998
NE	Pp06	20915001	20919999	4998
NE	Pp06	22451001	22470000	18999
NE	Pp06	22470001	22472000	1999
NE	Pp06	23610000	23611000	1000
NE	Pp06	24889001	24890000	999
NE	Pp06	26579001	26579999	998
NE	Pp06	26616001	26619000	2999
NE	Pp06	26811001	26822000	10999
NE	Pp06	26891001	26903000	11999
NE	Pp06	27124001	27136000	11999
NE	Pp06	27330000	27337000	7000
NE	Pp07	718001	732000	13999
NE	Pp07	734001	738000	3999
NE	Pp07	871001	883000	11999
NE	Pp07	1179001	1181000	1999
NE	Pp07	1466001	1474000	7999
NE	Pp07	2229001	2241000	11999
NE	Pp07	4010000	4015000	5000
NE	Pp07	9073001	9078000	4999
NE	Pp07	9834001	9839999	5998
NE	Pp07	9860000	9865000	5000
NE	Pp07	10105001	10117000	11999
NE	Pp07	11013001	11029999	16998
NE	Pp07	14320001	14329999	9998
NE	Pp07	14600000	14603000	3000
NE	Pp07	14970000	14972000	2000
NE	Pp07	15521001	15529000	7999
NE	Pp07	15530000	15534000	4000
NE	Pp07	15575001	15589999	14998
NE	Pp07	15610000	15614000	4000
NE	Pp07	15693001	15702000	8999
NE	Pp07	15760001	15769999	9998
NE	Pp07	16880000	16887000	7000
NE	Pp07	18190001	18191000	999
NE	Pp07	18210000	18218000	8000
NE	Pp07	18360000	18369999	9999
NE	Pp07	18694001	18697000	2999
NE	Pp07	18700000	18711000	11000
NE	Pp07	20110001	20112000	1999
NE	Pp08	215001	219999	4998
NE	Pp08	1104001	1110000	5999
NE	Pp08	1388001	1389999	1998
NE	Pp08	2940001	2950000	9999
NE	Pp08	4801001	4811000	9999
NE	Pp08	5587001	5614000	26999
NE	Pp08	6369001	6382000	12999
NE	Pp08	8791001	8794000	2999
NE	Pp08	10879001	10891000	11999
NE	Pp08	11201001	11202000	999
NE	Pp08	11210001	11211000	999
NE	Pp08	13120000	13137000	17000
NE	Pp08	13206001	13212000	5999
NE	Pp08	13751001	13759999	8998
NE	Pp08	13790000	13801000	11000
NE	Pp08	14887001	14889999	2998
NE	Pp08	20850000	20856000	6000
NE	Pp08	21240000	21245000	5000
NE	Pp08	21570001	21579000	8999
TB	Pp01	350715	355000	4285
TB	Pp01	360001	360734	733
TB	Pp01	470943	475962	5019
TB	Pp01	5290111	5295130	5019
TB	Pp01	5811102	5816121	5019
TB	Pp01	5991445	5996464	5019
TB	Pp01	7564437	7569456	5019
TB	Pp01	7584206	7615000	30794
TB	Pp01	7990001	8055000	64999
TB	Pp01	8426076	8431095	5019
TB	Pp01	8456133	8461153	5020
TB	Pp01	8971157	8975000	3843
TB	Pp01	9020001	9075000	54999
TB	Pp01	23194168	23199188	5020
TB	Pp01	23410001	23414588	4587
TB	Pp01	28043394	28048412	5018
TB	Pp01	33870001	33885000	14999
TB	Pp01	36000001	36015000	14999
TB	Pp01	36100001	36195000	94999
TB	Pp01	36339172	36344192	5020
TB	Pp01	38000001	38045000	44999
TB	Pp01	38170001	38175000	4999
TB	Pp02	1330001	1415000	84999
TB	Pp02	1835965	1875000	39035
TB	Pp02	14600001	14690242	90241
TB	Pp02	18071468	18072020	552
TB	Pp02	18237524	18242556	5032
TB	Pp02	18277652	18292712	15060
TB	Pp02	19431276	19436308	5032
TB	Pp02	19762316	19767348	5032
TB	Pp02	20143516	20148548	5032
TB	Pp02	20866716	20965000	98284
TB	Pp02	23213164	23218196	5032
TB	Pp02	25881552	25886584	5032
TB	Pp02	29011392	29016424	5032
TB	Pp03	40228	55299	15071
TB	Pp03	70290	195000	124710
TB	Pp03	331259	336295	5036
TB	Pp03	1003642	1008678	5036
TB	Pp03	1214389	1219424	5035
TB	Pp03	1645918	1650954	5036
TB	Pp03	1696096	1701132	5036
TB	Pp03	2258088	2263123	5035
TB	Pp03	2328337	2333372	5035
TB	Pp03	2358443	2360000	1557
TB	Pp03	2880293	2885328	5035
TB	Pp03	2920435	2925470	5035
TB	Pp03	2960577	2965613	5036
TB	Pp03	7275870	7280906	5036
TB	Pp03	7326048	7331083	5035
TB	Pp03	7837862	7842897	5035
TB	Pp03	7930001	7996100	66099
TB	Pp03	8064861	8125000	60139
TB	Pp03	8259355	8267005	7650
TB	Pp03	8469375	8470102	727
TB	Pp03	8680849	8685885	5036
TB	Pp03	9834939	9839975	5036
TB	Pp03	9895153	9900188	5035
TB	Pp03	10095864	10100899	5035
TB	Pp03	10125971	10131006	5035
TB	Pp03	10186184	10191219	5035
TB	Pp03	10206255	10211291	5036
TB	Pp03	10899698	10903745	4047
TB	Pp03	10958922	10963958	5036
TB	Pp03	11030001	11045000	14999
TB	Pp03	11940001	11995000	54999
TB	Pp03	12320001	12325000	4999
TB	Pp03	12850001	12945000	94999
TB	Pp03	12996142	13001178	5036
TB	Pp03	13136640	13141675	5035
TB	Pp03	13176782	13181818	5036
TB	Pp03	13200001	13295000	94999
TB	Pp03	13427671	13432707	5036
TB	Pp03	13528027	13533062	5035
TB	Pp03	14110090	14115125	5035
TB	Pp03	14140196	14145232	5036
TB	Pp03	14371014	14376050	5036
TB	Pp03	14411157	14416192	5035
TB	Pp03	14451299	14456334	5035
TB	Pp03	14471370	14486441	15071
TB	Pp03	14702188	14717259	15071
TB	Pp03	14752366	14757401	5035
TB	Pp03	17060678	17075000	14322
TB	Pp03	17361612	17366648	5036
TB	Pp03	17590001	17592430	2429
TB	Pp03	17622538	17627572	5034
TB	Pp03	20041108	20046144	5036
TB	Pp03	20081250	20086286	5036
TB	Pp03	20161534	20166570	5036
TB	Pp03	20283834	20286998	3164
TB	Pp03	20312068	20317104	5036
TB	Pp03	20382318	20387352	5034
TB	Pp03	20412424	20417460	5036
TB	Pp03	20472638	20477674	5036
TB	Pp03	20502744	20507780	5036
TB	Pp03	20653278	20658314	5036
TB	Pp03	20957872	20969416	11544
TB	Pp03	21034630	21039664	5034
TB	Pp03	21100001	21195000	94999
TB	Pp03	21405944	21410980	5036
TB	Pp03	21426016	21431052	5036
TB	Pp03	21526372	21531408	5036
TB	Pp03	21546442	21551478	5036
TB	Pp03	21610001	21695796	85795
TB	Pp03	22830996	22846066	15070
TB	Pp03	22971494	22976528	5034
TB	Pp03	22991564	22996600	5036
TB	Pp03	23061814	23066848	5034
TB	Pp03	23090001	23235000	144999
TB	Pp03	23302666	23307702	5036
TB	Pp03	23332774	23347844	15070
TB	Pp03	23382952	23387986	5034
TB	Pp03	23447592	23448200	608
TB	Pp03	23463236	23468272	5036
TB	Pp03	23523450	23528484	5034
TB	Pp03	23543520	23548556	5036
TB	Pp03	23623804	23628840	5036
TB	Pp03	23784374	23789410	5036
TB	Pp03	23804444	23809480	5036
TB	Pp03	23824516	23829552	5036
TB	Pp03	23864658	23869694	5036
TB	Pp03	24346366	24351400	5034
TB	Pp03	24386508	24391544	5036
TB	Pp03	24406578	24411614	5036
TB	Pp03	24446722	24451756	5034
TB	Pp03	24486864	24491898	5034
TB	Pp03	24500001	24595000	94999
TB	Pp03	24637396	24642432	5036
TB	Pp03	24667504	24672538	5034
TB	Pp03	24687574	24702646	15072
TB	Pp03	24727716	24731516	3800
TB	Pp03	24928428	24933464	5036
TB	Pp03	24968570	24973606	5036
TB	Pp03	25299744	25304780	5036
TB	Pp03	25319816	25324850	5034
TB	Pp03	25410136	25415170	5034
TB	Pp03	25440242	25445278	5036
TB	Pp03	25550634	25555668	5034
TB	Pp03	25630918	25635954	5036
TB	Pp03	25650988	25656024	5036
TB	Pp03	25671060	25676096	5036
TB	Pp03	25701166	25706202	5036
TB	Pp03	25791486	25796522	5036
TB	Pp03	25841664	25846700	5036
TB	Pp03	25871772	25876806	5034
TB	Pp03	25901878	25920496	18618
TB	Pp03	26674616	26689688	15072
TB	Pp03	26714758	26782486	67728
TB	Pp03	26805078	26810114	5036
TB	Pp04	301285	325000	23715
TB	Pp04	450001	497562	47561
TB	Pp04	632735	657839	25104
TB	Pp04	713012	718047	5035
TB	Pp04	733082	738116	5034
TB	Pp04	943809	948844	5035
TB	Pp04	993983	999017	5034
TB	Pp04	1120001	1165000	44999
TB	Pp04	1335161	1340195	5034
TB	Pp04	1485334	1505000	19666
TB	Pp04	1907135	1912170	5035
TB	Pp04	2238279	2243313	5034
TB	Pp04	2338625	2343660	5035
TB	Pp04	2360001	2455000	94999
TB	Pp04	2479110	2484145	5035
TB	Pp04	2610211	2685000	74789
TB	Pp04	2800219	2805254	5035
TB	Pp04	2880001	2945739	65738
TB	Pp04	3935605	4001302	65697
TB	Pp04	4425832	4430866	5034
TB	Pp04	8324456	8329309	4853
TB	Pp04	10540001	10635000	94999
TB	Pp04	11360001	11385000	24999
TB	Pp04	12854935	12880039	25104
TB	Pp04	12975351	12980386	5035
TB	Pp04	16176403	16181438	5035
TB	Pp04	16990001	17096074	106073
TB	Pp04	18705136	18710168	5032
TB	Pp04	18845620	18850652	5032
TB	Pp04	19000000	19005000	5000
TB	Pp04	19307212	19312248	5036
TB	Pp04	19969500	19984568	15068
TB	Pp04	19999604	20004640	5036
TB	Pp04	20079880	20084916	5036
TB	Pp04	20190260	20195296	5036
TB	Pp04	21474696	21479732	5036
TB	Pp04	21825908	21830944	5036
TB	Pp05	211421	216473	5052
TB	Pp05	850001	875000	24999
TB	Pp05	3186901	3191953	5052
TB	Pp05	4190001	4301000	110999
TB	Pp05	4380001	4405000	24999
TB	Pp05	4674641	4679694	5053
TB	Pp05	4855583	4860635	5052
TB	Pp05	5290001	5295000	4999
TB	Pp05	6970001	7085000	114999
TB	Pp05	7110001	7145000	34999
TB	Pp05	7370001	7385000	14999
TB	Pp05	7530001	7595000	64999
TB	Pp05	7961743	7966795	5052
TB	Pp05	8735770	8740822	5052
TB	Pp05	9479640	9484692	5052
TB	Pp05	10220001	10223000	2999
TB	Pp05	11110001	11205000	94999
TB	Pp05	11490001	11522909	32908
TB	Pp05	11680001	11734366	54365
TB	Pp05	11930001	11945000	14999
TB	Pp05	12290001	12365000	74999
TB	Pp05	13108791	13113572	4781
TB	Pp05	13310001	13341776	31775
TB	Pp05	13548494	13549000	506
TB	Pp05	13912703	13917756	5053
TB	Pp05	14022902	14085000	62098
TB	Pp05	14690001	14785000	94999
TB	Pp05	15470809	15475862	5053
TB	Pp05	17250001	17395000	144999
TB	Pp06	16409489	16414519	5030
TB	Pp06	21484788	21489818	5030
TB	Pp06	21665332	21670362	5030
TB	Pp06	21695424	21746234	50810
TB	Pp06	22100001	22121724	21723
TB	Pp06	22136754	22171874	35120
TB	Pp06	22186904	22201966	15062
TB	Pp06	22216996	22220000	3004
TB	Pp06	22826694	22838870	12176
TB	Pp06	22889022	22904082	15060
TB	Pp06	22919112	22924142	5030
TB	Pp06	22939172	22964262	25090
TB	Pp06	22979294	23014414	35120
TB	Pp06	23039474	23094656	55182
TB	Pp06	23109686	23114716	5030
TB	Pp06	23220018	23220318	300
TB	Pp06	23610001	23616228	6227
TB	Pp06	23641288	23646318	5030
TB	Pp06	23661350	23676410	15060
TB	Pp06	23691440	23756652	65212
TB	Pp06	23771682	23785000	13318
TB	Pp06	23841894	23927166	85272
TB	Pp06	23952226	23965000	12774
TB	Pp06	24240802	24278224	37422
TB	Pp06	24293254	24318344	25090
TB	Pp06	24333374	24378526	45152
TB	Pp06	24403586	24408616	5030
TB	Pp06	24433678	24434404	726
TB	Pp06	24624252	24679434	55182
TB	Pp06	24694464	24715000	20536
TB	Pp06	24880001	24960280	80279
TB	Pp06	24975310	25010430	35120
TB	Pp06	25330001	25401610	71609
TB	Pp06	25416640	25425000	8360
TB	Pp06	25516942	25521972	5030
TB	Pp06	25537004	25552064	15060
TB	Pp06	25567094	25615000	47906
TB	Pp06	25660001	25702518	42517
TB	Pp06	25737608	25765000	27392
TB	Pp06	26028484	26033998	5514
TB	Pp06	26209028	26224090	15062
TB	Pp06	26300001	26324392	24391
TB	Pp06	26349452	26395000	45548
TB	Pp06	26490001	26585000	94999
TB	Pp06	27181962	27186992	5030
TB	Pp06	27202022	27217082	15060
TB	Pp06	27252174	27257204	5030
TB	Pp06	27272234	27277264	5030
TB	Pp06	27292294	27317386	25092
TB	Pp06	27342446	27347476	5030
TB	Pp06	27372536	27407658	35122
TB	Pp06	28024502	28025000	498
TB	Pp06	28987404	28992434	5030
TB	Pp06	29018908	29035000	16092
TB	Pp06	29378584	29383614	5030
TB	Pp06	29408674	29413704	5030
TB	Pp06	29448794	29453826	5032
TB	Pp06	29498946	29503976	5030
TB	Pp06	29689520	29694550	5030
TB	Pp06	29719612	29724642	5030
TB	Pp06	29749702	29754732	5030
TB	Pp06	29990428	29995458	5030
TB	Pp06	30191032	30196062	5030
TB	Pp06	30420001	30495424	75423
TB	Pp07	990001	994932	4931
TB	Pp07	2049545	2054589	5044
TB	Pp07	3716840	3721884	5044
TB	Pp07	4098509	4103553	5044
TB	Pp07	4379740	4384784	5044
TB	Pp07	4450001	4545000	94999
TB	Pp07	8240001	8342096	102095
TB	Pp07	9120001	9235000	114999
TB	Pp07	11611377	11616421	5044
TB	Pp07	11651553	11656597	5044
TB	Pp07	12870001	12878378	8377
TB	Pp07	13110001	13205000	94999
TB	Pp07	14303153	14308197	5044
TB	Pp07	14650001	14685000	34999
TB	Pp07	14790001	14885000	94999
TB	Pp07	15126756	15131800	5044
TB	Pp07	15290001	15385000	94999
TB	Pp07	16800001	16895000	94999
TB	Pp07	17180001	17275000	94999
TB	Pp07	17794478	17798444	3966
TB	Pp07	17808488	17813532	5044
TB	Pp07	17838620	17863752	25132
TB	Pp07	17878796	17883840	5044
TB	Pp07	17949104	17954148	5044
TB	Pp07	18220290	18225334	5044
TB	Pp07	19867496	19872540	5044
TB	Pp07	20220001	20325000	104999
TB	Pp07	20570001	20685000	114999
TB	Pp07	20841758	20845000	3242
TB	Pp08	2650001	2655000	4999
TB	Pp08	3343976	3349018	5042
TB	Pp08	3400001	3425000	24999
TB	Pp08	4716945	4724732	7787
TB	Pp08	6720001	6735000	14999
TB	Pp08	6989115	6994157	5042
TB	Pp08	7621743	7626785	5042
TB	Pp08	7700001	7715000	14999
TB	Pp08	8364829	8365084	255
TB	Pp08	9198291	9203333	5042
TB	Pp08	11126298	11133757	7459
TB	Pp08	14110001	14205000	94999
TB	Pp08	14269352	14274394	5042
TB	Pp08	14379811	14381284	1473
TB	Pp08	20100001	20103084	3083
TB	Pp08	20122040	20213206	91166
TB	Pp08	20274292	20279332	5040
TB	Pp08	20886836	20891876	5040
TB	Pp08	20937044	20942084	5040
TB	Pp08	21087668	21092712	5044
TB	Pp08	21127836	21132880	5044
TB	Pp08	21160340	21185000	24660
TB	Pp08	21340001	21355000	14999
TB	Pp08	21419044	21424088	5044
TB	Pp08	21609060	21645000	35940
TB	Pp08	21660048	21665088	5040
TB	Pp08	21710256	21715000	4744
TB	Pp08	22109292	22145000	35708
TB	Pp08	22212340	22217384	5044
TB	Pp08	22370001	22375204	5203
TB	Pp08	22523632	22528676	5044
ST	Pp01	115001	122000	6999
ST	Pp01	130001	133000	2999
ST	Pp01	2087001	2088000	999
ST	Pp01	2150000	2158000	8000
ST	Pp01	3521001	3531000	9999
ST	Pp01	5328001	5329999	1998
ST	Pp01	5550000	5558000	8000
ST	Pp01	5626001	5629999	3998
ST	Pp01	5915001	5918000	2999
ST	Pp01	5920000	5925000	5000
ST	Pp01	5931001	5939999	8998
ST	Pp01	9863001	9873000	9999
ST	Pp01	10490000	10492000	2000
ST	Pp01	10568001	10569999	1998
ST	Pp01	14084001	14101000	16999
ST	Pp01	14609001	14618000	8999
ST	Pp01	15633001	15637000	3999
ST	Pp01	16466001	16473000	6999
ST	Pp01	16539001	16539999	998
ST	Pp01	16547001	16550000	2999
ST	Pp01	17101001	17109999	8998
ST	Pp01	17457001	17458000	999
ST	Pp01	21660000	21669999	9999
ST	Pp01	21900000	21909999	9999
ST	Pp01	21934001	21939999	5998
ST	Pp01	21950000	21959999	9999
ST	Pp01	22530000	22535000	5000
ST	Pp01	23060001	23069999	9998
ST	Pp01	23160000	23161000	1000
ST	Pp01	23165001	23169999	4998
ST	Pp01	23180000	23189999	9999
ST	Pp01	23283001	23287000	3999
ST	Pp01	25490000	25499000	9000
ST	Pp01	26246001	26249999	3998
ST	Pp01	26460000	26464000	4000
ST	Pp01	30171001	30179999	8998
ST	Pp01	30450000	30459999	9999
ST	Pp01	31137001	31161000	23999
ST	Pp01	31162001	31189999	27998
ST	Pp01	31449001	31449999	998
ST	Pp01	33899001	33906000	6999
ST	Pp01	35126001	35129999	3998
ST	Pp01	37940000	37943000	3000
ST	Pp01	40656001	40659000	2999
ST	Pp01	40680000	40683000	3000
ST	Pp01	42991001	42994000	2999
ST	Pp01	44146001	44153000	6999
ST	Pp01	44450000	44459999	9999
ST	Pp01	44470000	44472000	2000
ST	Pp01	44476001	44488000	11999
ST	Pp01	44496001	44499999	3998
ST	Pp01	44510000	44512000	2000
ST	Pp01	44560000	44569999	9999
ST	Pp01	44635001	44639999	4998
ST	Pp01	44717001	44729999	12998
ST	Pp01	47745001	47752000	6999
ST	Pp02	2543001	2549999	6998
ST	Pp02	3398001	3399999	1998
ST	Pp02	4260000	4269999	9999
ST	Pp02	4280000	4297000	17000
ST	Pp02	4482001	4484000	1999
ST	Pp02	5130001	5139000	8999
ST	Pp02	5487001	5489999	2998
ST	Pp02	6630000	6640000	10000
ST	Pp02	7404001	7412000	7999
ST	Pp02	7590000	7591000	1000
ST	Pp02	8530000	8554000	24000
ST	Pp02	8566001	8582000	15999
ST	Pp02	8724001	8737000	12999
ST	Pp02	8760001	8768000	7999
ST	Pp02	8769001	8770000	999
ST	Pp02	8774001	8779000	4999
ST	Pp02	8822001	8851000	28999
ST	Pp02	8900000	8909999	9999
ST	Pp02	9039001	9049000	9999
ST	Pp02	10125001	10131000	5999
ST	Pp02	11597001	11609000	11999
ST	Pp02	11624001	11636000	11999
ST	Pp02	11717001	11736000	18999
ST	Pp02	11745001	11761000	15999
ST	Pp02	11781001	11804000	22999
ST	Pp02	12042001	12055000	12999
ST	Pp02	12638001	12648000	9999
ST	Pp02	12661001	12678000	16999
ST	Pp02	12687001	12705000	17999
ST	Pp02	12830000	12839999	9999
ST	Pp02	12857001	12867000	9999
ST	Pp02	12880000	12889999	9999
ST	Pp02	13820001	13825000	4999
ST	Pp02	14248001	14251000	2999
ST	Pp02	14363001	14369000	5999
ST	Pp02	14370001	14375000	4999
ST	Pp02	15384001	15387000	2999
ST	Pp02	15589001	15589999	998
ST	Pp02	15660000	15669999	9999
ST	Pp02	16128001	16129999	1998
ST	Pp02	16220000	16229999	9999
ST	Pp02	16400001	16403000	2999
ST	Pp02	16420000	16429000	9000
ST	Pp02	16713001	16716000	2999
ST	Pp02	16960001	16970000	9999
ST	Pp02	17019001	17022000	2999
ST	Pp02	18330000	18337000	7000
ST	Pp02	18524001	18529999	5998
ST	Pp02	18560000	18569999	9999
ST	Pp02	18680001	18686000	5999
ST	Pp02	18694001	18697000	2999
ST	Pp02	18698001	18705000	6999
ST	Pp02	18710000	18717000	7000
ST	Pp02	18771001	18784000	12999
ST	Pp02	18786001	18788000	1999
ST	Pp02	18805001	18815000	9999
ST	Pp02	18840000	18844000	4000
ST	Pp02	18880000	18884000	4000
ST	Pp02	19160000	19179999	19999
ST	Pp02	19902001	19912000	9999
ST	Pp02	19917001	19921000	3999
ST	Pp02	19925001	19936000	10999
ST	Pp02	19950001	19959000	8999
ST	Pp02	20409001	20409999	998
ST	Pp02	21422001	21448000	25999
ST	Pp02	21650001	21659999	9998
ST	Pp02	22970001	22980000	9999
ST	Pp02	23036001	23040000	3999
ST	Pp02	23578001	23588000	9999
ST	Pp02	24250000	24256000	6000
ST	Pp02	24289001	24289999	998
ST	Pp02	24330000	24338000	8000
ST	Pp02	24344001	24349999	5998
ST	Pp02	24430000	24436000	6000
ST	Pp02	24756001	24759999	3998
ST	Pp02	25150000	25154000	4000
ST	Pp02	26606001	26609999	3998
ST	Pp02	26640000	26647000	7000
ST	Pp02	27692001	27694000	1999
ST	Pp02	29007001	29017000	9999
ST	Pp02	29083001	29089999	6998
ST	Pp02	29210000	29214000	4000
ST	Pp03	3283001	3293000	9999
ST	Pp03	4670000	4675000	5000
ST	Pp03	4677001	4689999	12998
ST	Pp03	4826001	4836000	9999
ST	Pp03	5410000	5414000	4000
ST	Pp03	5438001	5439999	1998
ST	Pp03	5820000	5829999	9999
ST	Pp03	6115001	6125000	9999
ST	Pp03	7210000	7212000	2000
ST	Pp03	7400000	7402000	2000
ST	Pp03	7620000	7621000	1000
ST	Pp03	7700001	7708000	7999
ST	Pp03	7880000	7881000	1000
ST	Pp03	8090000	8097000	7000
ST	Pp03	8330000	8335000	5000
ST	Pp03	8360000	8362000	2000
ST	Pp03	8410000	8419999	9999
ST	Pp03	9010000	9016000	6000
ST	Pp03	9080000	9083000	3000
ST	Pp03	9130001	9135000	4999
ST	Pp03	9144001	9151000	6999
ST	Pp03	9170000	9176000	6000
ST	Pp03	9270000	9271000	1000
ST	Pp03	10850000	10859999	9999
ST	Pp03	10949001	10959999	10998
ST	Pp03	10962001	10968000	5999
ST	Pp03	10984001	10989999	5998
ST	Pp03	12160000	12161000	1000
ST	Pp03	12163001	12169999	6998
ST	Pp03	12233001	12247000	13999
ST	Pp03	12260000	12267000	7000
ST	Pp03	12775001	12782000	6999
ST	Pp03	12790000	12791000	1000
ST	Pp03	14465001	14477000	11999
ST	Pp03	14510001	14521000	10999
ST	Pp03	16336001	16339999	3998
ST	Pp03	16360000	16365000	5000
ST	Pp03	16595001	16599999	4998
ST	Pp03	16655001	16659999	4998
ST	Pp03	16795001	16799999	4998
ST	Pp03	17744001	17759000	14999
ST	Pp03	17800000	17809999	9999
ST	Pp03	17921001	17929999	8998
ST	Pp03	19952001	19959999	7998
ST	Pp03	20196001	20206000	9999
ST	Pp03	21735001	21739999	4998
ST	Pp03	21930001	21939999	9998
ST	Pp03	23264001	23285000	20999
ST	Pp03	24280001	24283000	2999
ST	Pp03	24302001	24308000	5999
ST	Pp03	24603001	24609000	5999
ST	Pp03	24707001	24725000	17999
ST	Pp03	25420000	25421000	1000
ST	Pp03	25511001	25529000	17999
ST	Pp03	25783001	25789999	6998
ST	Pp03	25858001	25859999	1998
ST	Pp03	26358001	26359999	1998
ST	Pp03	26625001	26629999	4998
ST	Pp04	2007001	2009999	2998
ST	Pp04	2280000	2283000	3000
ST	Pp04	2344001	2349999	5998
ST	Pp04	3350000	3364000	14000
ST	Pp04	4908001	4913000	4999
ST	Pp04	5460000	5467000	7000
ST	Pp04	5471001	5486000	14999
ST	Pp04	5529001	5529999	998
ST	Pp04	5806001	5832000	25999
ST	Pp04	6010000	6017000	7000
ST	Pp04	6564001	6569999	5998
ST	Pp04	6660001	6666000	5999
ST	Pp04	6677001	6686000	8999
ST	Pp04	7223001	7246000	22999
ST	Pp04	7888001	7893000	4999
ST	Pp04	8238001	8239999	1998
ST	Pp04	9521001	9529999	8998
ST	Pp04	10060000	10064000	4000
ST	Pp04	10220001	10228000	7999
ST	Pp04	11920000	11929999	9999
ST	Pp04	12134001	12139999	5998
ST	Pp04	12160000	12169999	9999
ST	Pp04	12250000	12259999	9999
ST	Pp04	12280000	12289999	9999
ST	Pp04	12370000	12379999	9999
ST	Pp04	12470000	12475000	5000
ST	Pp04	13523001	13529999	6998
ST	Pp04	13638001	13650000	11999
ST	Pp04	13854001	13856000	1999
ST	Pp04	13912001	13915000	2999
ST	Pp04	13985001	13989999	4998
ST	Pp04	14145001	14149999	4998
ST	Pp04	15092001	15102000	9999
ST	Pp04	15718001	15719999	1998
ST	Pp04	15730000	15733000	3000
ST	Pp04	17304001	17312000	7999
ST	Pp04	17329001	17337000	7999
ST	Pp04	17342001	17345000	2999
ST	Pp04	17349001	17352000	2999
ST	Pp04	17606001	17609000	2999
ST	Pp04	18446001	18452000	5999
ST	Pp04	18720000	18729999	9999
ST	Pp04	18740000	18759999	19999
ST	Pp04	18800000	18809999	9999
ST	Pp04	19020001	19032000	11999
ST	Pp04	19157001	19159999	2998
ST	Pp04	19229001	19229999	998
ST	Pp04	20556001	20562000	5999
ST	Pp04	20610000	20619999	9999
ST	Pp04	20770000	20773000	3000
ST	Pp04	20776001	20779999	3998
ST	Pp04	20795001	20800000	4999
ST	Pp04	21180000	21189999	9999
ST	Pp04	22500000	22509999	9999
ST	Pp05	1378001	1379999	1998
ST	Pp05	2760000	2761000	1000
ST	Pp05	3714001	3725000	10999
ST	Pp05	4555001	4559999	4998
ST	Pp05	6274001	6283000	8999
ST	Pp05	6407001	6412000	4999
ST	Pp05	6940000	6949999	9999
ST	Pp05	6960000	6989999	29999
ST	Pp05	7000000	7019999	19999
ST	Pp05	7640000	7649999	9999
ST	Pp05	7950000	7955000	5000
ST	Pp05	7999001	8001000	1999
ST	Pp05	8530000	8536000	6000
ST	Pp05	8870000	8876000	6000
ST	Pp05	9020001	9029999	9998
ST	Pp05	9300000	9309999	9999
ST	Pp05	10440000	10449000	9000
[truncated: 111 more rows]

## Sheet: Table S5
Table S5 Biological enrichment of genes under selection.
Group	Term	Database	Term ID	Hit number	Total number	Adjusted P value
Overall	Metabolic pathways	KEGG PATHWAY	ath01100	388	2246	4.41e-16
Overall	Biosynthesis of secondary metabolites	KEGG PATHWAY	ath01110	227	1107	5.8e-16
Overall	Cyanoamino acid metabolism	KEGG PATHWAY	ath00460	33	69	1.64e-09
Overall	Phenylpropanoid biosynthesis	KEGG PATHWAY	ath00940	50	166	2.96e-08
Overall	Starch and sucrose metabolism	KEGG PATHWAY	ath00500	45	165	1.27e-06
Overall	Plant-pathogen interaction	KEGG PATHWAY	ath04626	44	170	4.98e-06
Overall	Sesquiterpenoid and triterpenoid biosynthesis	KEGG PATHWAY	ath00909	14	23	1.33e-05
Overall	Zeatin biosynthesis	KEGG PATHWAY	ath00908	15	32	5.64e-05
Overall	Diterpenoid biosynthesis	KEGG PATHWAY	ath00904	11	22	0.000338498
Overall	Fatty acid biosynthesis	KEGG PATHWAY	ath00061	14	43	0.00139308
Overall	Mismatch repair	KEGG PATHWAY	ath03430	13	39	0.00169276
Overall	DNA replication	KEGG PATHWAY	ath03030	15	50	0.00176883
Overall	alpha-Linolenic acid metabolism	KEGG PATHWAY	ath00592	13	44	0.00340503
Overall	Pyruvate metabolism	KEGG PATHWAY	ath00620	19	86	0.00627269
Overall	Fatty acid metabolism	KEGG PATHWAY	ath01212	16	69	0.00737263
Overall	MAPK signaling pathway - plant	KEGG PATHWAY	ath04016	25	134	0.0104545
Overall	Base excision repair	KEGG PATHWAY	ath03410	11	43	0.0118965
Overall	Pentose and glucuronate interconversions	KEGG PATHWAY	ath00040	19	96	0.0131567
Overall	Biotin metabolism	KEGG PATHWAY	ath00780	6	16	0.0132776
Overall	Stilbenoid, diarylheptanoid and gingerol biosynthesis	KEGG PATHWAY	ath00945	4	7	0.0136731
Overall	Biosynthesis of amino acids	KEGG PATHWAY	ath01230	40	251	0.0143015
Overall	RNA polymerase	KEGG PATHWAY	ath03020	11	45	0.0145042
Overall	Flavonoid biosynthesis	KEGG PATHWAY	ath00941	7	22	0.0149689
Overall	Ubiquitin mediated proteolysis	KEGG PATHWAY	ath04120	25	143	0.0169309
Overall	Glycerolipid metabolism	KEGG PATHWAY	ath00561	13	60	0.0176067
Overall	Peroxisome	KEGG PATHWAY	ath04146	17	87	0.0176852
Overall	Carotenoid biosynthesis	KEGG PATHWAY	ath00906	8	29	0.0176852
Overall	Endocytosis	KEGG PATHWAY	ath04144	25	144	0.017686
Overall	Riboflavin metabolism	KEGG PATHWAY	ath00740	6	18	0.017926
Overall	Glycolysis / Gluconeogenesis	KEGG PATHWAY	ath00010	21	116	0.0184071
Overall	Nucleotide excision repair	KEGG PATHWAY	ath03420	14	69	0.0209006
Overall	Spliceosome	KEGG PATHWAY	ath03040	30	192	0.0274884
Overall	Autophagy - other	KEGG PATHWAY	ath04136	9	40	0.0284626
Overall	Tryptophan metabolism	KEGG PATHWAY	ath00380	12	60	0.0284626
Overall	Rubisco shunt	BioCyc	PWY-5723	7	28	0.02987
Overall	tRNA charging	BioCyc	TRNA-CHARGING-PWY	9	41	0.030181
Overall	flavin biosynthesis I (bacteria and plants)	BioCyc	RIBOSYN2-PWY	4	11	0.030181
Overall	methyl indole-3-acetate interconversion	BioCyc	PWY0A-6303	4	11	0.030181
Overall	RNA degradation	KEGG PATHWAY	ath03018	19	113	0.0325407
Overall	superpathway of phenylalanine, tyrosine and tryptophan biosynthesis	BioCyc	COMPLETE-ARO-ARA-PWY	7	29	0.0325548
Overall	Arachidonic acid metabolism	KEGG PATHWAY	ath00590	5	17	0.0325548
Overall	valine degradation I	BioCyc	VALDEG-PWY	5	17	0.0325548
Overall	Parkinson disease	PANTHER	P00049	13	70	0.0337261
Overall	Wnt signaling pathway	PANTHER	P00057	11	56	0.0337868
Overall	Circadian rhythm - plant	KEGG PATHWAY	ath04712	8	36	0.0343159
Overall	glycolysis IV (plant cytosol)	BioCyc	PWY-1042	8	36	0.0343159
Overall	fatty acid activation	BioCyc	PWY-5143	4	12	0.0352783
Overall	palmitate biosynthesis II (bacteria and plants)	BioCyc	PWY-5971	4	12	0.0352783
Overall	linoleate biosynthesis I (plants)	BioCyc	PWY-5995	4	12	0.0352783
Overall	phosphatidate metabolism, as a signaling molecule	BioCyc	PWY-7039	6	24	0.0362836
Overall	cytokinin-O-glucosides biosynthesis	BioCyc	PWY-2902	5	18	0.0363447
Overall	indole-3-acetate biosynthesis II	BioCyc	PWY-581	5	18	0.0363447
Overall	Carbon metabolism	KEGG PATHWAY	ath01200	39	273	0.0366368
Overall	superpathway of cytosolic glycolysis (plants), pyruvate dehydrogenase and TCA cycle	BioCyc	PWY-5464	13	73	0.0399601
Overall	simple coumarins biosynthesis	BioCyc	PWY-5868	6	25	0.0400813
Overall	De novo pyrimidine ribonucleotides biosythesis	PANTHER	P02740	4	13	0.0400813
Overall	Tryptophan biosynthesis	PANTHER	P02783	4	13	0.0400813
Overall	@@tryptophan biosynthesis	BioCyc	TRPSYN-PWY	4	17	0.0591456
Overall	pyruvate fermentation to ethanol II	BioCyc	PWY-5486	4	13	0.0400813
Overall	superpathway of carotenoid biosynthesis	BioCyc	CAROTENOID-PWY	4	13	0.0400813
Overall	acetaldehyde biosynthesis I	BioCyc	PWY-6333	4	13	0.0400813
Overall	camalexin biosynthesis	BioCyc	CAMALEXIN-SYN	7	32	0.0416275
Overall	UDP-glucose biosynthesis	BioCyc	PWY-7343	3	8	0.0423164
Overall	stachyose degradation	BioCyc	PWY-6527	3	8	0.0423164
Overall	Glycerophospholipid metabolism	KEGG PATHWAY	ath00564	16	97	0.0423351
Overall	ABC transporters	KEGG PATHWAY	ath02010	6	26	0.0431024
Overall	jasmonic acid biosynthesis	BioCyc	PWY-735	4	14	0.0449566
Overall	Arginine and proline metabolism	KEGG PATHWAY	ath00330	10	54	0.0449908
Overall	Ribosome	KEGG PATHWAY	ath03010	49	364	0.0451472
Overall	gluconeogenesis III	BioCyc	PWY66-399	6	27	0.0471655
Overall	sucrose biosynthesis I (from photosynthesis)	BioCyc	SUCSYN-PWY	6	27	0.0471655
Overall	Amino sugar and nucleotide sugar metabolism	KEGG PATHWAY	ath00520	20	131	0.0485164
Overall	Protein processing in endoplasmic reticulum	KEGG PATHWAY	ath04141	30	211	0.0488942
Overall	RNA transport	KEGG PATHWAY	ath03013	25	171	0.0490632
Overall	Insulin/IGF pathway-mitogen activated protein kinase kinase/MAP kinase cascade	PANTHER	P00032	5	21	0.0490632
Overall	superpathway of fatty acid biosynthesis II (plant)	BioCyc	PWY-5156	5	21	0.0490632
Overall	Histamine H1 receptor mediated signaling pathway	PANTHER	P04385	3	9	0.0491126
Overall	Flavin biosynthesis	PANTHER	P02741	3	9	0.0491126
Overall	Linoleic acid metabolism	KEGG PATHWAY	ath00591	3	9	0.0491126
Overall	cis-vaccenate biosynthesis	BioCyc	PWY-5973	3	9	0.0491126
Overall	octanoyl-ACP biosynthesis (mitochondria, yeast)	BioCyc	PWY-7388	3	9	0.0491126
Overall	superpathway of isoleucine and valine biosynthesis	BioCyc	ILE-VAL-PWY	3	9	0.0491126
Overall	cellular anatomical entity	Gene Ontology	GO:0110165	2898	20476	8.58e-119
Overall	cellular process	Gene Ontology	GO:0009987	1872	11150	9.42e-100
Overall	binding	Gene Ontology	GO:0005488	1657	9385	1.14e-98
Overall	metabolic process	Gene Ontology	GO:0008152	1732	10224	4.37e-91
Overall	catalytic activity	Gene Ontology	GO:0003824	1403	7779	3.59e-83
Overall	organic substance metabolic process	Gene Ontology	GO:0071704	1529	8962	2.64e-77
Overall	ion binding	Gene Ontology	GO:0043167	976	4826	3.51e-73
Overall	primary metabolic process	Gene Ontology	GO:0044238	1426	8358	6.66e-70
Overall	cellular metabolic process	Gene Ontology	GO:0044237	1475	8765	1.19e-69
Overall	intracellular	Gene Ontology	GO:0005622	2412	17437	3.4e-61
Overall	cell periphery	Gene Ontology	GO:0071944	778	3773	7.06e-59
Overall	response to stimulus	Gene Ontology	GO:0050896	1006	5510	5.9e-56
Overall	heterocyclic compound binding	Gene Ontology	GO:1901363	1005	5527	3.69e-55
Overall	organic cyclic compound binding	Gene Ontology	GO:0097159	1007	5548	5.41e-55
Overall	membrane	Gene Ontology	GO:0016020	1144	6756	2.57e-50
Overall	carbohydrate derivative binding	Gene Ontology	GO:0097367	484	2006	3.51e-50
Overall	small molecule binding	Gene Ontology	GO:0036094	540	2389	5.03e-49
Overall	adenyl nucleotide binding	Gene Ontology	GO:0030554	438	1751	1.5e-48
Overall	ribonucleotide binding	Gene Ontology	GO:0032553	473	1977	3.75e-48
Overall	adenyl ribonucleotide binding	Gene Ontology	GO:0032559	436	1748	4.27e-48
Overall	purine nucleotide binding	Gene Ontology	GO:0017076	470	1960	4.27e-48
Overall	intracellular organelle	Gene Ontology	GO:0043229	2203	16019	5.39e-48
Overall	nucleotide binding	Gene Ontology	GO:0000166	508	2209	7.86e-48
Overall	nucleoside phosphate binding	Gene Ontology	GO:1901265	508	2209	7.86e-48
Overall	organelle	Gene Ontology	GO:0043226	2213	16128	1.02e-47
Overall	purine ribonucleotide binding	Gene Ontology	GO:0032555	468	1957	1.09e-47
Overall	membrane-bounded organelle	Gene Ontology	GO:0043227	2190	15953	7.13e-47
Overall	anion binding	Gene Ontology	GO:0043168	535	2407	7.13e-47
Overall	intracellular membrane-bounded organelle	Gene Ontology	GO:0043231	2169	15757	7.13e-47
Overall	nitrogen compound metabolic process	Gene Ontology	GO:0006807	1190	7262	1.24e-46
Overall	macromolecule metabolic process	Gene Ontology	GO:0043170	1121	6748	1.2e-45
Overall	cytoplasm	Gene Ontology	GO:0005737	1753	12053	1.95e-45
Overall	plasma membrane	Gene Ontology	GO:0005886	652	3279	7.51e-44
Overall	ATP binding	Gene Ontology	GO:0005524	402	1685	2e-40
Overall	purine ribonucleoside triphosphate binding	Gene Ontology	GO:0035639	431	1887	1.4e-39
Overall	drug binding	Gene Ontology	GO:0008144	420	1818	1.63e-39
Overall	response to stress	Gene Ontology	GO:0006950	609	3196	7.7e-36
Overall	biological regulation	Gene Ontology	GO:0065007	930	5631	3.18e-35
Overall	protein binding	Gene Ontology	GO:0005515	729	4103	6.26e-35
Overall	cellular macromolecule metabolic process	Gene Ontology	GO:0044260	916	5542	1.05e-34
Overall	transferase activity	Gene Ontology	GO:0016740	618	3353	8.18e-33
Overall	ADP binding	Gene Ontology	GO:0043531	78	99	3.23e-31
Overall	organonitrogen compound metabolic process	Gene Ontology	GO:1901564	755	4514	6e-29
Overall	regulation of biological process	Gene Ontology	GO:0050789	803	4901	1.46e-28
Overall	intrinsic component of membrane	Gene Ontology	GO:0031224	730	4358	5.04e-28
Overall	metal ion binding	Gene Ontology	GO:0046872	522	2828	2.17e-27
Overall	cation binding	Gene Ontology	GO:0043169	524	2844	2.38e-27
Overall	cellular response to stimulus	Gene Ontology	GO:0051716	505	2738	2.28e-26
Overall	integral component of membrane	Gene Ontology	GO:0016021	694	4151	2.89e-26
Overall	hydrolase activity	Gene Ontology	GO:0016787	502	2747	1.99e-25
Overall	transferase activity, transferring phosphorus-containing groups	Gene Ontology	GO:0016772	302	1375	5.49e-25
Overall	protein metabolic process	Gene Ontology	GO:0019538	604	3538	2.05e-24
Overall	regulation of cellular process	Gene Ontology	GO:0050794	711	4368	3.72e-24
Overall	catalytic activity, acting on a protein	Gene Ontology	GO:0140096	418	2209	2.1e-23
Overall	macromolecule modification	Gene Ontology	GO:0043412	484	2697	5.13e-23
Overall	phosphotransferase activity, alcohol group as acceptor	Gene Ontology	GO:0016773	242	1047	1.94e-22
Overall	protein phosphorylation	Gene Ontology	GO:0006468	226	949	2.44e-22
Overall	protein kinase activity	Gene Ontology	GO:0004672	220	916	3.88e-22
Overall	defense response	Gene Ontology	GO:0006952	289	1361	4.9e-22
Overall	cell communication	Gene Ontology	GO:0007154	370	1917	6.59e-22
Overall	plastid	Gene Ontology	GO:0009536	718	4526	8.22e-22
Overall	cellular protein metabolic process	Gene Ontology	GO:0044267	546	3214	1.71e-21
Overall	organic cyclic compound metabolic process	Gene Ontology	GO:1901360	644	3969	2.36e-21
Overall	biosynthetic process	Gene Ontology	GO:0009058	687	4309	3.02e-21
Overall	response to external stimulus	Gene Ontology	GO:0009605	326	1632	3.02e-21
Overall	multi-organism process	Gene Ontology	GO:0051704	338	1720	4.63e-21
Overall	phosphorylation	Gene Ontology	GO:0016310	276	1301	5e-21
Overall	organic substance biosynthetic process	Gene Ontology	GO:1901576	668	4182	8.87e-21
Overall	cellular biosynthetic process	Gene Ontology	GO:0044249	659	4123	1.58e-20
Overall	kinase activity	Gene Ontology	GO:0016301	256	1185	2.14e-20
Overall	protein modification process	Gene Ontology	GO:0036211	424	2362	4.11e-20
Overall	cellular protein modification process	Gene Ontology	GO:0006464	424	2362	4.11e-20
Overall	phosphate-containing compound metabolic process	Gene Ontology	GO:0006796	354	1864	5.27e-20
Overall	phosphorus metabolic process	Gene Ontology	GO:0006793	359	1901	5.92e-20
Overall	cell wall	Gene Ontology	GO:0005618	165	628	6.79e-20
Overall	external encapsulating structure	Gene Ontology	GO:0030312	165	629	7.66e-20
Overall	protein serine/threonine kinase activity	Gene Ontology	GO:0004674	185	750	9.14e-20
Overall	extracellular region	Gene Ontology	GO:0005576	491	2906	7.57e-19
Overall	chloroplast	Gene Ontology	GO:0009507	654	4164	8.06e-19
Overall	cellular aromatic compound metabolic process	Gene Ontology	GO:0006725	618	3882	8.06e-19
Overall	developmental process	Gene Ontology	GO:0032502	504	3027	2.71e-18
Overall	response to abiotic stimulus	Gene Ontology	GO:0009628	362	1981	3.68e-18
Overall	signal transduction	Gene Ontology	GO:0007165	319	1678	4.41e-18
Overall	response to other organism	Gene Ontology	GO:0051707	255	1247	9.64e-18
Overall	response to external biotic stimulus	Gene Ontology	GO:0043207	255	1247	9.64e-18
Overall	regulation of biological quality	Gene Ontology	GO:0065008	226	1056	1.15e-17
Overall	anatomical structure development	Gene Ontology	GO:0048856	481	2882	1.33e-17
Overall	response to biotic stimulus	Gene Ontology	GO:0009607	256	1259	1.47e-17
Overall	multicellular organismal process	Gene Ontology	GO:0032501	468	2789	1.76e-17
Overall	signaling	Gene Ontology	GO:0023052	320	1713	3.19e-17
Overall	endomembrane system	Gene Ontology	GO:0012505	369	2065	3.19e-17
Overall	response to chemical	Gene Ontology	GO:0042221	457	2743	1.4e-16
Overall	catabolic process	Gene Ontology	GO:0009056	297	1587	4.53e-16
Overall	lipid metabolic process	Gene Ontology	GO:0006629	195	895	5.63e-16
Overall	heterocycle metabolic process	Gene Ontology	GO:0046483	583	3744	5.63e-16
Overall	cellular nitrogen compound metabolic process	Gene Ontology	GO:0034641	649	4283	1.12e-15
Overall	transition metal ion binding	Gene Ontology	GO:0046914	202	955	2.09e-15
Overall	response to endogenous stimulus	Gene Ontology	GO:0009719	276	1475	6.04e-15
Overall	cytosol	Gene Ontology	GO:0005829	462	2853	6.35e-15
Overall	cellular component organization or biogenesis	Gene Ontology	GO:0071840	453	2787	7.35e-15
Overall	cellular lipid metabolic process	Gene Ontology	GO:0044255	152	651	1.18e-14
Overall	response to oxygen-containing compound	Gene Ontology	GO:1901700	278	1504	1.68e-14
Overall	nucleobase-containing compound metabolic process	Gene Ontology	GO:0006139	538	3464	1.68e-14
Overall	terpenoid metabolic process	Gene Ontology	GO:0006721	62	158	7.71e-14
Overall	response to organic substance	Gene Ontology	GO:0010033	310	1760	8.86e-14
Overall	response to hormone	Gene Ontology	GO:0009725	268	1461	1.16e-13
Overall	defense response to other organism	Gene Ontology	GO:0098542	205	1025	1.49e-13
Overall	nucleic acid metabolic process	Gene Ontology	GO:0090304	491	3145	1.63e-13
Overall	innate immune response	Gene Ontology	GO:0045087	98	352	2.17e-13
Overall	organic substance catabolic process	Gene Ontology	GO:1901575	255	1381	2.68e-13
Overall	immune system process	Gene Ontology	GO:0002376	104	391	4.08e-13
Overall	small molecule metabolic process	Gene Ontology	GO:0044281	270	1496	4.48e-13
Overall	immune response	Gene Ontology	GO:0006955	98	358	4.97e-13
Overall	RNA metabolic process	Gene Ontology	GO:0016070	439	2776	8.61e-13
Overall	nucleus	Gene Ontology	GO:0005634	1145	8632	1.18e-12
Overall	oxoacid metabolic process	Gene Ontology	GO:0043436	202	1032	1.28e-12
Overall	organic acid metabolic process	Gene Ontology	GO:0006082	203	1039	1.28e-12
Overall	post-embryonic development	Gene Ontology	GO:0009791	268	1503	1.74e-12
Overall	multicellular organism development	Gene Ontology	GO:0007275	408	2554	1.95e-12
Overall	terpenoid biosynthetic process	Gene Ontology	GO:0016114	54	136	2.34e-12
Overall	symplast	Gene Ontology	GO:0055044	173	847	3.31e-12
Overall	isoprenoid metabolic process	Gene Ontology	GO:0006720	66	197	3.73e-12
Overall	organic cyclic compound biosynthetic process	Gene Ontology	GO:1901362	397	2483	3.73e-12
Overall	response to acid chemical	Gene Ontology	GO:0001101	218	1161	4.59e-12
Overall	cell junction	Gene Ontology	GO:0030054	172	846	5.14e-12
Overall	plasmodesma	Gene Ontology	GO:0009506	172	846	5.14e-12
Overall	cell-cell junction	Gene Ontology	GO:0005911	172	846	5.14e-12
Overall	oxidation-reduction process	Gene Ontology	GO:0055114	265	1501	5.7e-12
Overall	transport	Gene Ontology	GO:0006810	362	2226	6.21e-12
Overall	reproductive process	Gene Ontology	GO:0022414	290	1686	6.27e-12
Overall	localization	Gene Ontology	GO:0051179	388	2434	9.54e-12
Overall	reproduction	Gene Ontology	GO:0000003	290	1695	1.05e-11
Overall	establishment of localization	Gene Ontology	GO:0051234	364	2255	1.22e-11
Overall	lipid biosynthetic process	Gene Ontology	GO:0008610	115	488	1.52e-11
Overall	regulation of hormone levels	Gene Ontology	GO:0010817	90	342	2.65e-11
Overall	nucleic acid binding	Gene Ontology	GO:0003676	475	3147	3.94e-11
Overall	carboxylic acid metabolic process	Gene Ontology	GO:0019752	177	906	4.02e-11
Overall	sesquiterpenoid metabolic process	Gene Ontology	GO:0006714	29	43	4.81e-11
Overall	isoprenoid biosynthetic process	Gene Ontology	GO:0008299	58	173	7.94e-11
Overall	oxidoreductase activity	Gene Ontology	GO:0016491	228	1276	8.2e-11
Overall	cellular component organization	Gene Ontology	GO:0016043	392	2514	9.15e-11
Overall	gene expression	Gene Ontology	GO:0010467	478	3199	1.21e-10
Overall	aromatic compound biosynthetic process	Gene Ontology	GO:0019438	375	2395	1.66e-10
Overall	vacuole	Gene Ontology	GO:0005773	187	1003	2.98e-10
Overall	regulation of response to stimulus	Gene Ontology	GO:0048583	132	631	4.21e-10
Overall	cellular nitrogen compound biosynthetic process	Gene Ontology	GO:0044271	436	2899	4.83e-10
Overall	sesquiterpenoid biosynthetic process	Gene Ontology	GO:0016106	25	35	5.08e-10
Overall	regulation of metabolic process	Gene Ontology	GO:0019222	453	3039	5.77e-10
Overall	system development	Gene Ontology	GO:0048731	293	1804	1.07e-09
Overall	plant-type hypersensitive response	Gene Ontology	GO:0009626	35	76	1.11e-09
Overall	response to lipid	Gene Ontology	GO:0033993	146	737	1.13e-09
Overall	multi-multicellular organism process	Gene Ontology	GO:0044706	71	262	1.4e-09
Overall	pollination	Gene Ontology	GO:0009856	71	262	1.4e-09
Overall	host programmed cell death induced by symbiont	Gene Ontology	GO:0034050	35	77	1.42e-09
Overall	ligand-gated channel activity	Gene Ontology	GO:0022834	22	28	1.77e-09
Overall	ligand-gated ion channel activity	Gene Ontology	GO:0015276	22	28	1.77e-09
Overall	cellular catabolic process	Gene Ontology	GO:0044248	218	1255	1.86e-09
Overall	response to oomycetes	Gene Ontology	GO:0002239	37	87	1.9e-09
Overall	Golgi apparatus	Gene Ontology	GO:0005794	192	1068	2.01e-09
Overall	response to alcohol	Gene Ontology	GO:0097305	116	544	2.02e-09
Overall	multi-organism cellular process	Gene Ontology	GO:0044764	39	97	2.32e-09
Overall	developmental process involved in reproduction	Gene Ontology	GO:0003006	238	1410	2.79e-09
Overall	monocarboxylic acid metabolic process	Gene Ontology	GO:0032787	104	471	3.13e-09
Overall	hormone metabolic process	Gene Ontology	GO:0042445	68	254	4.69e-09
Overall	response to abscisic acid	Gene Ontology	GO:0009737	114	542	5.46e-09
Overall	macromolecule biosynthetic process	Gene Ontology	GO:0009059	435	2958	6.11e-09
Overall	gated channel activity	Gene Ontology	GO:0022836	33	75	7.99e-09
Overall	heterocycle biosynthetic process	Gene Ontology	GO:0018130	353	2316	8.87e-09
Overall	chemical homeostasis	Gene Ontology	GO:0048878	87	375	1.01e-08
Overall	cellular macromolecule biosynthetic process	Gene Ontology	GO:0034645	424	2885	1.07e-08
Overall	response to salt stress	Gene Ontology	GO:0009651	98	446	1.14e-08
Overall	magnesium ion binding	Gene Ontology	GO:0000287	38	100	1.27e-08
Overall	anatomical structure morphogenesis	Gene Ontology	GO:0009653	158	858	1.64e-08
Overall	ion transmembrane transporter activity	Gene Ontology	GO:0015075	131	672	1.93e-08
Overall	protein-containing complex	Gene Ontology	GO:0032991	346	2287	2.56e-08
Overall	catalytic activity, acting on RNA	Gene Ontology	GO:0140098	83	359	2.58e-08
Overall	regulation of cellular metabolic process	Gene Ontology	GO:0031323	413	2823	2.78e-08
Overall	hormone biosynthetic process	Gene Ontology	GO:0042446	53	182	2.79e-08
Overall	homeostatic process	Gene Ontology	GO:0042592	111	543	3.19e-08
Overall	regulation of primary metabolic process	Gene Ontology	GO:0080090	399	2719	3.74e-08
Overall	zinc ion binding	Gene Ontology	GO:0008270	101	480	4.24e-08
Overall	cellular response to chemical stimulus	Gene Ontology	GO:0070887	231	1412	4.7e-08
Overall	RNA processing	Gene Ontology	GO:0006396	127	658	5.2e-08
Overall	ion transmembrane transport	Gene Ontology	GO:0034220	136	721	5.38e-08
Overall	response to bacterium	Gene Ontology	GO:0009617	95	445	6.19e-08
Overall	inorganic molecular entity transmembrane transporter activity	Gene Ontology	GO:0015318	124	640	6.27e-08
Overall	organelle membrane	Gene Ontology	GO:0031090	294	1902	6.27e-08
Overall	hydrolase activity, hydrolyzing O-glycosyl compounds	Gene Ontology	GO:0004553	75	319	7.05e-08
Overall	cellular component biogenesis	Gene Ontology	GO:0044085	188	1100	7.28e-08
Overall	transporter activity	Gene Ontology	GO:0005215	188	1100	7.28e-08
Overall	response to wounding	Gene Ontology	GO:0009611	52	184	8.2e-08
Overall	inorganic ion homeostasis	Gene Ontology	GO:0098771	64	254	8.68e-08
Overall	transmembrane transport	Gene Ontology	GO:0055085	198	1178	9e-08
Overall	cellular response to stress	Gene Ontology	GO:0033554	172	987	9.18e-08
Overall	reproductive structure development	Gene Ontology	GO:0048608	201	1202	9.77e-08
Overall	reproductive system development	Gene Ontology	GO:0061458	201	1203	1.03e-07
Overall	response to osmotic stress	Gene Ontology	GO:0006970	105	518	1.06e-07
Overall	cell death	Gene Ontology	GO:0008219	50	175	1.1e-07
Overall	nucleotidyltransferase activity	Gene Ontology	GO:0016779	46	154	1.28e-07
Overall	cation homeostasis	Gene Ontology	GO:0055080	61	240	1.35e-07
Overall	transmembrane transporter activity	Gene Ontology	GO:0022857	181	1061	1.43e-07
Overall	ion homeostasis	Gene Ontology	GO:0050801	68	285	1.85e-07
Overall	nucleobase-containing compound biosynthetic process	Gene Ontology	GO:0034654	318	2119	1.94e-07
Overall	negative regulation of biological process	Gene Ontology	GO:0048519	170	986	1.98e-07
Overall	response to radiation	Gene Ontology	GO:0009314	129	692	2.03e-07
Overall	hydrolase activity, acting on glycosyl bonds	Gene Ontology	GO:0016798	79	355	2.03e-07
Overall	signaling receptor activity	Gene Ontology	GO:0038023	57	220	2.09e-07
Overall	hydrolase activity, acting on acid anhydrides	Gene Ontology	GO:0016817	133	721	2.13e-07
Overall	regulation of macromolecule metabolic process	Gene Ontology	GO:0060255	408	2845	2.23e-07
Overall	carbon-oxygen lyase activity	Gene Ontology	GO:0016835	40	126	2.44e-07
Overall	pyrophosphatase activity	Gene Ontology	GO:0016462	131	709	2.44e-07
Overall	peptidase activity, acting on L-amino acid peptides	Gene Ontology	GO:0070011	91	436	2.63e-07
Overall	apoplast	Gene Ontology	GO:0048046	88	417	2.81e-07
Overall	endopeptidase activity	Gene Ontology	GO:0004175	70	302	2.92e-07
Overall	scopolin beta-glucosidase activity	Gene Ontology	GO:0102483	21	38	2.95e-07
Overall	response to light stimulus	Gene Ontology	GO:0009416	125	670	2.99e-07
Overall	carbohydrate metabolic process	Gene Ontology	GO:0005975	162	936	3.09e-07
Overall	secondary metabolic process	Gene Ontology	GO:0019748	77	347	3.11e-07
Overall	molecular transducer activity	Gene Ontology	GO:0060089	62	254	3.3e-07
Overall	cellular response to oxygen-containing compound	Gene Ontology	GO:1901701	119	630	3.38e-07
Overall	hydrolase activity, acting on acid anhydrides, in phosphorus-containing anhydrides	Gene Ontology	GO:0016818	131	715	3.52e-07
Overall	terpene synthase activity	Gene Ontology	GO:0010333	17	24	3.67e-07
Overall	ion transport	Gene Ontology	GO:0006811	157	905	4.18e-07
Overall	programmed cell death	Gene Ontology	GO:0012501	43	146	4.37e-07
Overall	carbon-oxygen lyase activity, acting on phosphates	Gene Ontology	GO:0016838	18	28	4.44e-07
Overall	cellular response to endogenous stimulus	Gene Ontology	GO:0071495	153	879	5e-07
Overall	cell growth	Gene Ontology	GO:0016049	84	398	5.13e-07
Overall	non-membrane-bounded organelle	Gene Ontology	GO:0043228	226	1428	5.41e-07
Overall	intracellular non-membrane-bounded organelle	Gene Ontology	GO:0043232	226	1428	5.41e-07
Overall	nuclear lumen	Gene Ontology	GO:0031981	152	875	5.99e-07
Overall	cellular ketone metabolic process	Gene Ontology	GO:0042180	37	116	6.16e-07
Overall	nucleoside-triphosphatase activity	Gene Ontology	GO:0017111	123	668	6.49e-07
Overall	growth	Gene Ontology	GO:0040007	115	612	6.57e-07
Overall	regulation of biosynthetic process	Gene Ontology	GO:0009889	345	2372	7.11e-07
Overall	regulation of defense response	Gene Ontology	GO:0031347	57	233	9.34e-07
Overall	positive regulation of biological process	Gene Ontology	GO:0048518	188	1151	9.52e-07
Overall	hydrolase activity, acting on ester bonds	Gene Ontology	GO:0016788	157	922	1.07e-06
Overall	small molecule biosynthetic process	Gene Ontology	GO:0044283	119	648	1.12e-06
Overall	peptidase activity	Gene Ontology	GO:0008233	94	475	1.17e-06
Overall	response to fungus	Gene Ontology	GO:0009620	107	565	1.21e-06
Overall	cellular component morphogenesis	Gene Ontology	GO:0032989	85	415	1.21e-06
Overall	intracellular organelle lumen	Gene Ontology	GO:0070013	176	1066	1.21e-06
Overall	organelle lumen	Gene Ontology	GO:0043233	176	1066	1.21e-06
Overall	membrane-enclosed lumen	Gene Ontology	GO:0031974	176	1066	1.21e-06
Overall	organonitrogen compound catabolic process	Gene Ontology	GO:1901565	134	757	1.22e-06
Overall	oxidoreductase activity, acting on the CH-CH group of donors, NAD or NADP as acceptor	Gene Ontology	GO:0016628	18	31	1.25e-06
Overall	pollen-pistil interaction	Gene Ontology	GO:0009875	24	56	1.26e-06
Overall	iron ion binding	Gene Ontology	GO:0005506	59	249	1.37e-06
Overall	rRNA processing	Gene Ontology	GO:0006364	48	183	1.38e-06
Overall	recognition of pollen	Gene Ontology	GO:0048544	23	52	1.39e-06
Overall	negative regulation of response to stimulus	Gene Ontology	GO:0048585	50	195	1.42e-06
Overall	DNA binding	Gene Ontology	GO:0003677	301	2041	1.45e-06
Overall	cellular response to organic substance	Gene Ontology	GO:0071310	163	974	1.53e-06
Overall	regulation of response to stress	Gene Ontology	GO:0080134	72	333	1.59e-06
Overall	plant organ development	Gene Ontology	GO:0099402	156	923	1.6e-06
Overall	regulation of nitrogen compound metabolic process	Gene Ontology	GO:0051171	377	2660	1.77e-06
Overall	extrinsic component of plasma membrane	Gene Ontology	GO:0019897	13	15	2.09e-06
Overall	cation transmembrane transport	Gene Ontology	GO:0098655	87	436	2.15e-06
Overall	response to UV-B	Gene Ontology	GO:0010224	25	63	2.17e-06
Overall	fruit development	Gene Ontology	GO:0010154	123	688	2.2e-06
Overall	rRNA metabolic process	Gene Ontology	GO:0016072	48	187	2.23e-06
Overall	cell recognition	Gene Ontology	GO:0008037	23	54	2.24e-06
Overall	cation transport	Gene Ontology	GO:0006812	104	555	2.45e-06
Overall	oxidoreductase activity, acting on paired donors, with incorporation or reduction of molecular oxygen	Gene Ontology	GO:0016705	68	312	2.45e-06
Overall	DNA biosynthetic process	Gene Ontology	GO:0071897	24	59	2.47e-06
Overall	transferase activity, transferring acyl groups other than amino-acyl groups	Gene Ontology	GO:0016747	67	306	2.54e-06
Overall	active transmembrane transporter activity	Gene Ontology	GO:0022804	97	508	2.74e-06
Overall	cell morphogenesis	Gene Ontology	GO:0000902	78	379	2.76e-06
Overall	ubiquitin protein ligase binding	Gene Ontology	GO:0031625	23	55	2.8e-06
Overall	cation transmembrane transporter activity	Gene Ontology	GO:0008324	82	406	2.8e-06
Overall	seed development	Gene Ontology	GO:0048316	118	658	3.09e-06
Overall	ribonuclease activity	Gene Ontology	GO:0004540	35	117	3.81e-06
Overall	ubiquitin-like protein ligase binding	Gene Ontology	GO:0044389	24	61	3.86e-06
Overall	ion channel activity	Gene Ontology	GO:0005216	37	129	4.42e-06
Overall	cellular response to hormone stimulus	Gene Ontology	GO:0032870	145	863	4.91e-06
Overall	terpene metabolic process	Gene Ontology	GO:0042214	20	44	5.01e-06
Overall	defense response, incompatible interaction	Gene Ontology	GO:0009814	45	176	5.01e-06
Overall	lyase activity	Gene Ontology	GO:0016829	71	340	5.12e-06
Overall	carboxylic acid biosynthetic process	Gene Ontology	GO:0046394	94	497	5.41e-06
Overall	organic acid biosynthetic process	Gene Ontology	GO:0016053	94	497	5.41e-06
Overall	transmembrane signaling receptor activity	Gene Ontology	GO:0004888	44	171	5.56e-06
Overall	RNA phosphodiester bond hydrolysis	Gene Ontology	GO:0090501	38	137	6.12e-06
Overall	lignin metabolic process	Gene Ontology	GO:0009808	26	73	6.21e-06
Overall	phenylpropanoid biosynthetic process	Gene Ontology	GO:0009699	30	94	6.89e-06
Overall	nucleolus	Gene Ontology	GO:0005730	83	425	7.16e-06
Overall	defense response to bacterium	Gene Ontology	GO:0042742	76	378	7.45e-06
Overall	cyclase activity	Gene Ontology	GO:0009975	18	37	7.48e-06
Overall	cellular divalent inorganic cation homeostasis	Gene Ontology	GO:0072503	22	55	8.02e-06
Overall	regulation of signal transduction	Gene Ontology	GO:0009966	61	281	8.92e-06
Overall	regulation of cellular biosynthetic process	Gene Ontology	GO:0031326	332	2349	9.66e-06
Overall	response to organic cyclic compound	Gene Ontology	GO:0014070	68	328	9.86e-06
Overall	cell wall organization or biogenesis	Gene Ontology	GO:0071554	111	627	9.86e-06
Overall	enzyme binding	Gene Ontology	GO:0019899	81	416	1.01e-05
Overall	regulation of cell communication	Gene Ontology	GO:0010646	62	289	1.01e-05
Overall	hormone-mediated signaling pathway	Gene Ontology	GO:0009755	132	783	1.13e-05
Overall	lignin biosynthetic process	Gene Ontology	GO:0009809	21	52	1.15e-05
Overall	proteolysis	Gene Ontology	GO:0006508	143	867	1.26e-05
Overall	phenylpropanoid metabolic process	Gene Ontology	GO:0009698	36	131	1.26e-05
Overall	beta-glucosidase activity	Gene Ontology	GO:0008422	24	67	1.31e-05
Overall	shoot system development	Gene Ontology	GO:0048367	139	838	1.31e-05
Overall	metal ion homeostasis	Gene Ontology	GO:0055065	48	203	1.34e-05
Overall	regulation of signaling	Gene Ontology	GO:0023051	61	286	1.37e-05
Overall	macromolecule catabolic process	Gene Ontology	GO:0009057	138	832	1.4e-05
Overall	RNA-directed DNA polymerase activity	Gene Ontology	GO:0003964	16	31	1.4e-05
Overall	inorganic cation transmembrane transporter activity	Gene Ontology	GO:0022890	74	373	1.41e-05
Overall	cellular developmental process	Gene Ontology	GO:0048869	142	863	1.47e-05
Overall	cellular metal ion homeostasis	Gene Ontology	GO:0006875	35	127	1.56e-05
Overall	regulation of cellular component organization	Gene Ontology	GO:0051128	66	321	1.62e-05
Overall	defense response to fungus	Gene Ontology	GO:0050832	92	500	1.64e-05
Overall	regulation of gene expression	Gene Ontology	GO:0010468	342	2450	1.66e-05
Overall	cellular response to acid chemical	Gene Ontology	GO:0071229	90	488	1.89e-05
Overall	inorganic ion transmembrane transport	Gene Ontology	GO:0098660	83	440	2.03e-05
Overall	active ion transmembrane transporter activity	Gene Ontology	GO:0022853	56	258	2.03e-05
Overall	RNA-dependent DNA biosynthetic process	Gene Ontology	GO:0006278	18	41	2.09e-05
Overall	secondary active transmembrane transporter activity	Gene Ontology	GO:0015291	67	331	2.1e-05
Overall	endoribonuclease activity, producing 5'-phosphomonoesters	Gene Ontology	GO:0016891	21	55	2.16e-05
Overall	inorganic cation transmembrane transport	Gene Ontology	GO:0098662	74	379	2.19e-05
Overall	response to temperature stimulus	Gene Ontology	GO:0009266	100	562	2.23e-05
Overall	regulation of flavonoid biosynthetic process	Gene Ontology	GO:0009962	14	25	2.54e-05
Overall	organic hydroxy compound metabolic process	Gene Ontology	GO:1901615	62	300	2.54e-05
Overall	glucosidase activity	Gene Ontology	GO:0015926	26	81	2.54e-05
Overall	endoribonuclease activity	Gene Ontology	GO:0004521	25	76	2.63e-05
Overall	extrinsic component of membrane	Gene Ontology	GO:0019898	21	56	2.64e-05
Overall	divalent inorganic cation homeostasis	Gene Ontology	GO:0072507	23	66	2.7e-05
Overall	positive regulation of cellular process	Gene Ontology	GO:0048522	147	914	2.7e-05
Overall	oxidoreductase activity, acting on paired donors, with incorporation or reduction of molecular oxygen, NAD(P)H as one donor, and incorporation of one atom of oxygen	Gene Ontology	GO:0016709	42	173	2.7e-05
Overall	positive regulation of metabolic process	Gene Ontology	GO:0009893	130	786	2.7e-05
Overall	tissue development	Gene Ontology	GO:0009888	102	581	2.88e-05
Overall	catalytic activity, acting on DNA	Gene Ontology	GO:0140097	40	162	3.07e-05
Overall	DNA metabolic process	Gene Ontology	GO:0006259	81	433	3.19e-05
Overall	endoplasmic reticulum	Gene Ontology	GO:0005783	129	782	3.21e-05
Overall	organic substance transport	Gene Ontology	GO:0071702	180	1175	3.7e-05
Overall	polysaccharide binding	Gene Ontology	GO:0030247	17	39	3.75e-05
Overall	endonuclease activity, active with either ribo- or deoxyribonucleic acids and producing 5'-phosphomonoesters	Gene Ontology	GO:0016893	21	58	3.93e-05
Overall	oxidoreductase activity, acting on the CH-CH group of donors	Gene Ontology	GO:0016627	22	63	3.94e-05
Overall	diterpenoid biosynthetic process	Gene Ontology	GO:0016102	16	35	4.13e-05
Overall	cellular calcium ion homeostasis	Gene Ontology	GO:0006874	18	44	4.15e-05
Overall	DNA polymerase activity	Gene Ontology	GO:0034061	18	44	4.15e-05
Overall	RNA polymerase V complex	Gene Ontology	GO:0000419	12	19	4.23e-05
Overall	response to cold	Gene Ontology	GO:0009409	73	382	4.37e-05
Overall	acylglycerol metabolic process	Gene Ontology	GO:0006639	14	27	4.59e-05
Overall	neutral lipid metabolic process	Gene Ontology	GO:0006638	14	27	4.59e-05
Overall	ncRNA metabolic process	Gene Ontology	GO:0034660	66	335	4.7e-05
Overall	defense response to bacterium, incompatible interaction	Gene Ontology	GO:0009816	17	40	4.7e-05
Overall	unidimensional cell growth	Gene Ontology	GO:0009826	59	288	4.75e-05
Overall	regulation of cellular macromolecule biosynthetic process	Gene Ontology	GO:2000112	315	2267	4.84e-05
Overall	cellular response to lipid	Gene Ontology	GO:0071396	74	391	4.99e-05
Overall	regulation of nucleobase-containing compound metabolic process	Gene Ontology	GO:0019219	296	2113	5.06e-05
Overall	RNA biosynthetic process	Gene Ontology	GO:0032774	266	1869	5.06e-05
Overall	lipid catabolic process	Gene Ontology	GO:0016042	49	224	5.41e-05
Overall	nucleic acid-templated transcription	Gene Ontology	GO:0097659	264	1855	5.41e-05
Overall	negative regulation of signal transduction	Gene Ontology	GO:0009968	28	97	5.52e-05
Overall	divalent metal ion transport	Gene Ontology	GO:0070838	31	114	5.55e-05
Overall	regulation of macromolecule biosynthetic process	Gene Ontology	GO:0010556	317	2289	5.6e-05
Overall	negative regulation of cellular process	Gene Ontology	GO:0048523	112	667	5.61e-05
Overall	ncRNA processing	Gene Ontology	GO:0034470	57	277	5.64e-05
Overall	embryo development ending in seed dormancy	Gene Ontology	GO:0009793	86	478	5.71e-05
Overall	macromolecule localization	Gene Ontology	GO:0033036	155	993	5.71e-05
Overall	sesquiterpene metabolic process	Gene Ontology	GO:0051761	12	20	5.8e-05
Overall	sesquiterpene biosynthetic process	Gene Ontology	GO:0051762	12	20	5.8e-05
Overall	ribosome biogenesis	Gene Ontology	GO:0042254	57	278	6.05e-05
Overall	protein dimerization activity	Gene Ontology	GO:0046983	91	515	6.05e-05
Overall	monocarboxylic acid biosynthetic process	Gene Ontology	GO:0072330	52	245	6.05e-05
Overall	calcium ion homeostasis	Gene Ontology	GO:0055074	18	46	6.2e-05
Overall	RNA-DNA hybrid ribonuclease activity	Gene Ontology	GO:0004523	16	37	6.51e-05
Overall	transferase activity, transferring acyl groups	Gene Ontology	GO:0016746	68	354	6.66e-05
Overall	RNA phosphodiester bond hydrolysis, endonucleolytic	Gene Ontology	GO:0090502	25	82	6.66e-05
Overall	cofactor binding	Gene Ontology	GO:0048037	137	859	6.66e-05
Overall	transcription, DNA-templated	Gene Ontology	GO:0006351	262	1847	6.74e-05
Overall	monooxygenase activity	Gene Ontology	GO:0004497	53	253	6.77e-05
Overall	ribonucleoprotein complex biogenesis	Gene Ontology	GO:0022613	64	327	6.82e-05
Overall	ATPase activity	Gene Ontology	GO:0016887	80	439	7.04e-05
Overall	regulation of pH	Gene Ontology	GO:0006885	17	42	7.06e-05
Overall	terpene biosynthetic process	Gene Ontology	GO:0046246	15	33	7.06e-05
Overall	glucosinolate catabolic process	Gene Ontology	GO:0019762	15	33	7.06e-05
Overall	glycosinolate catabolic process	Gene Ontology	GO:0019759	15	33	7.06e-05
Overall	S-glycoside catabolic process	Gene Ontology	GO:0016145	15	33	7.06e-05
Overall	regulation of cellular ketone metabolic process	Gene Ontology	GO:0010565	23	72	7.26e-05
Overall	transferase activity, transferring glycosyl groups	Gene Ontology	GO:0016757	97	563	7.59e-05
Overall	copper ion binding	Gene Ontology	GO:0005507	40	171	7.59e-05
Overall	monocarboxylic acid transmembrane transporter activity	Gene Ontology	GO:0008028	12	21	7.85e-05
Overall	developmental growth	Gene Ontology	GO:0048589	79	434	7.9e-05
Overall	cellular response to organonitrogen compound	Gene Ontology	GO:0071417	13	25	7.9e-05
Overall	cellular response to organic cyclic compound	Gene Ontology	GO:0071407	37	153	7.94e-05
Overall	diterpenoid metabolic process	Gene Ontology	GO:0016101	16	38	7.98e-05
Overall	cellular cation homeostasis	Gene Ontology	GO:0030003	36	147	7.98e-05
Overall	carbohydrate derivative catabolic process	Gene Ontology	GO:1901136	24	78	7.99e-05
Overall	organelle envelope	Gene Ontology	GO:0031967	152	980	8.28e-05
Overall	envelope	Gene Ontology	GO:0031975	152	980	8.28e-05
Overall	metal ion transport	Gene Ontology	GO:0030001	65	337	8.31e-05
Overall	divalent inorganic cation transport	Gene Ontology	GO:0072511	31	118	8.72e-05
Overall	regulation of RNA metabolic process	Gene Ontology	GO:0051252	287	2062	8.99e-05
Overall	negative regulation of signaling	Gene Ontology	GO:0023057	28	101	8.99e-05
Overall	negative regulation of cell communication	Gene Ontology	GO:0010648	28	101	8.99e-05
Overall	defense response to fungus, incompatible interaction	Gene Ontology	GO:0009817	18	48	8.99e-05
Overall	nucleic acid phosphodiester bond hydrolysis	Gene Ontology	GO:0090305	51	244	9.27e-05
Overall	regulation of cell growth	Gene Ontology	GO:0001558	26	90	9.27e-05
Overall	regulation of cellular component biogenesis	Gene Ontology	GO:0044087	29	107	9.28e-05
Overall	response to UV	Gene Ontology	GO:0009411	29	107	9.28e-05
Overall	carbohydrate binding	Gene Ontology	GO:0030246	53	258	9.81e-05
Overall	passive transmembrane transporter activity	Gene Ontology	GO:0022803	40	174	9.98e-05
Overall	channel activity	Gene Ontology	GO:0015267	40	174	9.98e-05
Overall	response to brassinosteroid	Gene Ontology	GO:0009741	28	102	0.000101934
Overall	cellular response to abscisic acid stimulus	Gene Ontology	GO:0071215	51	246	0.000108264
Overall	cellular response to alcohol	Gene Ontology	GO:0097306	51	246	0.000108264
Overall	negative regulation of cellular response to alcohol	Gene Ontology	GO:1905958	18	49	0.000108264
Overall	negative regulation of response to alcohol	Gene Ontology	GO:1901420	18	49	0.000108264
Overall	negative regulation of abscisic acid-activated signaling pathway	Gene Ontology	GO:0009788	18	49	0.000108264
Overall	nuclease activity	Gene Ontology	GO:0004518	46	214	0.000116131
Overall	lipid localization	Gene Ontology	GO:0010876	35	145	0.000122347
Overall	positive regulation of cellular metabolic process	Gene Ontology	GO:0031325	119	737	0.000122347
Overall	regulation of transcription, DNA-templated	Gene Ontology	GO:0006355	276	1984	0.000124354
Overall	transferase complex	Gene Ontology	GO:1990234	87	501	0.000134372
Overall	drug metabolic process	Gene Ontology	GO:0017144	91	531	0.000140346
Overall	RNA binding	Gene Ontology	GO:0003723	155	1017	0.000140346
Overall	developmental growth involved in morphogenesis	Gene Ontology	GO:0060560	62	324	0.000140469
Overall	embryo development	Gene Ontology	GO:0009790	87	503	0.000150169
Overall	regulation of small molecule metabolic process	Gene Ontology	GO:0062012	25	88	0.000152891
Overall	monovalent inorganic cation homeostasis	Gene Ontology	GO:0055067	20	61	0.000153889
Overall	preribosome	Gene Ontology	GO:0030684	20	61	0.000153889
Overall	monovalent inorganic cation transmembrane transporter activity	Gene Ontology	GO:0015077	50	244	0.000157728
Overall	gibberellin biosynthetic process	Gene Ontology	GO:0009686	14	32	0.000158423
Overall	O-acyltransferase activity	Gene Ontology	GO:0008374	27	100	0.000165631
Overall	protein autophosphorylation	Gene Ontology	GO:0046777	37	161	0.00017812
Overall	heme binding	Gene Ontology	GO:0020037	57	293	0.000179199
Overall	chitin binding	Gene Ontology	GO:0008061	11	20	0.00019107
Overall	protein catabolic process	Gene Ontology	GO:0030163	94	559	0.00019107
Overall	regulation of nucleic acid-templated transcription	Gene Ontology	GO:1903506	276	2000	0.000192704
Overall	regulation of RNA biosynthetic process	Gene Ontology	GO:2001141	276	2000	0.000192704
Overall	cellular chemical homeostasis	Gene Ontology	GO:0055082	40	181	0.000194442
Overall	monocarboxylic acid transport	Gene Ontology	GO:0015718	14	33	0.000200698
Overall	gibberellin metabolic process	Gene Ontology	GO:0009685	14	33	0.000200698
Overall	secretory vesicle	Gene Ontology	GO:0099503	35	150	0.000205836
Overall	cell morphogenesis involved in differentiation	Gene Ontology	GO:0000904	46	221	0.000210226
Overall	cellular ion homeostasis	Gene Ontology	GO:0006873	36	157	0.000221874
Overall	DNA-dependent ATPase activity	Gene Ontology	GO:0008094	22	74	0.000221874
Overall	regulation of response to external stimulus	Gene Ontology	GO:0032101	38	170	0.000229542
Overall	regulation of hormone metabolic process	Gene Ontology	GO:0032350	17	48	0.000230505
Overall	glycosyl compound catabolic process	Gene Ontology	GO:1901658	17	48	0.000230505
Overall	solute:cation symporter activity	Gene Ontology	GO:0015294	26	97	0.000235185
Overall	cytoplasmic vesicle	Gene Ontology	GO:0031410	107	661	0.000238463
Overall	dioxygenase activity	Gene Ontology	GO:0051213	31	127	0.000243397
Overall	phyllome development	Gene Ontology	GO:0048827	83	483	0.000245087
Overall	intracellular vesicle	Gene Ontology	GO:0097708	107	662	0.000249094
Overall	symporter activity	Gene Ontology	GO:0015293	34	146	0.000256832
Overall	regulation of response to biotic stimulus	Gene Ontology	GO:0002831	37	165	0.000259178
Overall	metal ion transmembrane transporter activity	Gene Ontology	GO:0046873	43	204	0.000263339
Overall	bounding membrane of organelle	Gene Ontology	GO:0098588	171	1161	0.000266696
Overall	metalloendopeptidase activity	Gene Ontology	GO:0004222	15	39	0.000266749
Overall	regulation of molecular function	Gene Ontology	GO:0065009	101	619	0.000275336
Overall	peptide receptor activity	Gene Ontology	GO:0001653	7	7	0.000276051
Overall	neurotransmitter transmembrane transporter activity	Gene Ontology	GO:0005326	7	7	0.000276051
Overall	5'-3' RNA polymerase activity	Gene Ontology	GO:0034062	18	55	0.000323043
Overall	RNA polymerase activity	Gene Ontology	GO:0097747	18	55	0.000323043
Overall	positive regulation of catalytic activity	Gene Ontology	GO:0043085	42	200	0.000328417
Overall	glucosyltransferase activity	Gene Ontology	GO:0046527	38	174	0.000330072
Overall	cell surface receptor signaling pathway	Gene Ontology	GO:0007166	35	155	0.00033564
Overall	pollen tube development	Gene Ontology	GO:0048868	39	181	0.000345325
Overall	abscisic acid-activated signaling pathway	Gene Ontology	GO:0009738	45	221	0.000357905
Overall	efflux transmembrane transporter activity	Gene Ontology	GO:0015562	13	31	0.000359759
Overall	regulation of abscisic acid-activated signaling pathway	Gene Ontology	GO:0009787	25	95	0.000377265
Overall	regulation of cellular response to alcohol	Gene Ontology	GO:1905957	25	95	0.000377265
Overall	regulation of response to alcohol	Gene Ontology	GO:1901419	25	95	0.000377265
Overall	regulation of immune system process	Gene Ontology	GO:0002682	30	125	0.000377265
Overall	cell wall biogenesis	Gene Ontology	GO:0042546	48	242	0.000377468
Overall	catalytic complex	Gene Ontology	GO:1902494	130	849	0.000386413
Overall	external encapsulating structure organization	Gene Ontology	GO:0045229	87	523	0.000420957
Overall	whole membrane	Gene Ontology	GO:0098805	131	859	0.000422804
Overall	fatty acid metabolic process	Gene Ontology	GO:0006631	46	230	0.000425433
Overall	endonuclease activity	Gene Ontology	GO:0004519	29	120	0.000425509
Overall	plastid stroma	Gene Ontology	GO:0009532	106	667	0.000434905
Overall	transferase activity, transferring hexosyl groups	Gene Ontology	GO:0016758	65	363	0.00043787
Overall	condensed nuclear chromosome	Gene Ontology	GO:0000794	11	23	0.000441067
Overall	UDP-glycosyltransferase activity	Gene Ontology	GO:0008194	50	258	0.00044723
Overall	carbohydrate derivative metabolic process	Gene Ontology	GO:1901135	99	615	0.00045596
Overall	plastid envelope	Gene Ontology	GO:0009526	99	615	0.00045596
Overall	chloroplast envelope	Gene Ontology	GO:0009941	97	600	0.000457884
Overall	cellular aldehyde metabolic process	Gene Ontology	GO:0006081	16	47	0.000475624
Overall	polygalacturonase activity	Gene Ontology	GO:0004650	16	47	0.000475624
Overall	tetrapyrrole binding	Gene Ontology	GO:0046906	59	322	0.000483252
Overall	positive regulation of molecular function	Gene Ontology	GO:0044093	43	212	0.000500155
Overall	plant-type cell wall organization or biogenesis	Gene Ontology	GO:0071669	49	253	0.000509453
Overall	ribonucleoprotein complex	Gene Ontology	GO:1990904	92	565	0.000518907
Overall	protein self-association	Gene Ontology	GO:0043621	24	92	0.000531432
Overall	solute:proton symporter activity	Gene Ontology	GO:0015295	24	92	0.000531432
Overall	positive regulation of biosynthetic process	Gene Ontology	GO:0009891	92	566	0.000542911
Overall	response to auxin	Gene Ontology	GO:0009733	65	367	0.000550374
Overall	nitrogen compound transport	Gene Ontology	GO:0071705	140	937	0.000551215
Overall	DNA-directed 5'-3' RNA polymerase activity	Gene Ontology	GO:0003899	16	48	0.000565397
Overall	voltage-gated channel activity	Gene Ontology	GO:0022832	14	38	0.000570592
Overall	regulation of hormone biosynthetic process	Gene Ontology	GO:0046885	14	38	0.000570592
Overall	voltage-gated ion channel activity	Gene Ontology	GO:0005244	14	38	0.000570592
Overall	negative regulation of catabolic process	Gene Ontology	GO:0009895	8	12	0.000572596
Overall	floral organ development	Gene Ontology	GO:0048437	43	214	0.000577492
Overall	monovalent inorganic cation transport	Gene Ontology	GO:0015672	51	269	0.000585935
Overall	vacuolar membrane	Gene Ontology	GO:0005774	92	568	0.000588624
Overall	positive regulation of protein modification process	Gene Ontology	GO:0031401	25	99	0.000596447
Overall	calcium ion transport	Gene Ontology	GO:0006816	18	59	0.000597639
Overall	extracellular matrix	Gene Ontology	GO:0031012	10	20	0.000601709
Overall	negative regulation of seed germination	Gene Ontology	GO:0010187	10	20	0.000601709
Overall	cell wall organization	Gene Ontology	GO:0071555	81	487	0.000629024
Overall	regulation of isoprenoid metabolic process	Gene Ontology	GO:0019747	12	29	0.000631025
Overall	chloroplast stroma	Gene Ontology	GO:0009570	104	661	0.00063157
Overall	negative regulation of metabolic process	Gene Ontology	GO:0009892	99	623	0.000636615
Overall	quercetin 7-O-glucosyltransferase activity	Gene Ontology	GO:0080044	16	49	0.000660503
Overall	neurotransmitter transport	Gene Ontology	GO:0006836	7	9	0.000687558
Overall	steroid hormone mediated signaling pathway	Gene Ontology	GO:0043401	21	77	0.000709084
Overall	response to steroid hormone	Gene Ontology	GO:0048545	21	77	0.000709084
Overall	cellular response to steroid hormone stimulus	Gene Ontology	GO:0071383	21	77	0.000709084
Overall	brassinosteroid mediated signaling pathway	Gene Ontology	GO:0009742	21	77	0.000709084
Overall	plastid membrane	Gene Ontology	GO:0042170	47	245	0.000753023
Overall	peptide transport	Gene Ontology	GO:0015833	108	696	0.000753268
Overall	transmembrane receptor protein kinase activity	Gene Ontology	GO:0019199	34	158	0.000774914
Overall	glucuronosyltransferase activity	Gene Ontology	GO:0015020	10	21	0.0007889
Overall	chloroplast membrane	Gene Ontology	GO:0031969	46	239	0.000801207
Overall	organic hydroxy compound transmembrane transporter activity	Gene Ontology	GO:1901618	8	13	0.000808539
Overall	sulfur compound catabolic process	Gene Ontology	GO:0044273	15	45	0.000808711
Overall	positive regulation of nitrogen compound metabolic process	Gene Ontology	GO:0051173	108	698	0.000814049
Overall	amide transport	Gene Ontology	GO:0042886	110	715	0.000868672
Overall	cellular response to nitrogen compound	Gene Ontology	GO:1901699	16	51	0.000921514
Overall	cellular response to brassinosteroid stimulus	Gene Ontology	GO:0071367	21	79	0.000921514
Overall	UDP-glucosyltransferase activity	Gene Ontology	GO:0035251	29	128	0.000943895
Overall	plant-type cell wall biogenesis	Gene Ontology	GO:0009832	35	167	0.000958946
Overall	response to jasmonic acid	Gene Ontology	GO:0009753	44	228	0.000978309
Overall	cellular macromolecule catabolic process	Gene Ontology	GO:0044265	97	618	0.000994144
Overall	transferase complex, transferring phosphorus-containing groups	Gene Ontology	GO:0061695	34	161	0.00100512
Overall	metallopeptidase activity	Gene Ontology	GO:0008237	17	57	0.00100512
Overall	vesicle-mediated transport	Gene Ontology	GO:0016192	64	371	0.00102193
Overall	inward rectifier potassium channel activity	Gene Ontology	GO:0005242	7	10	0.00102423
Overall	plant organ senescence	Gene Ontology	GO:0090693	29	129	0.0010327
Overall	amide biosynthetic process	Gene Ontology	GO:0043604	104	673	0.0010327
Overall	auxin polar transport	Gene Ontology	GO:0009926	21	80	0.00103591
Overall	phloem or xylem histogenesis	Gene Ontology	GO:0010087	23	92	0.00104998
Overall	cysteine-type peptidase activity	Gene Ontology	GO:0008234	27	117	0.00109889
Overall	triglyceride biosynthetic process	Gene Ontology	GO:0019432	9	18	0.00109905
Overall	regulation of anthocyanin biosynthetic process	Gene Ontology	GO:0031540	8	14	0.00111909
Overall	enzyme linked receptor protein signaling pathway	Gene Ontology	GO:0007167	31	143	0.00114427
Overall	transmembrane receptor protein serine/threonine kinase signaling pathway	Gene Ontology	GO:0007178	31	143	0.00114427
Overall	transmembrane receptor protein serine/threonine kinase activity	Gene Ontology	GO:0004675	31	143	0.00114427
Overall	lipase activity	Gene Ontology	GO:0016298	24	99	0.00116295
Overall	lipid transport	Gene Ontology	GO:0006869	28	124	0.00116701
Overall	leaf senescence	Gene Ontology	GO:0010150	28	124	0.00116701
Overall	vesicle	Gene Ontology	GO:0031982	111	732	0.00123086
Overall	triglyceride metabolic process	Gene Ontology	GO:0006641	10	23	0.00129483
Overall	voltage-gated cation channel activity	Gene Ontology	GO:0022843	10	23	0.00129483
Overall	reproductive shoot system development	Gene Ontology	GO:0090567	78	480	0.00131232
Overall	GTPase binding	Gene Ontology	GO:0051020	22	88	0.00132053
Overall	organic acid transmembrane transporter activity	Gene Ontology	GO:0005342	26	113	0.0013747
Overall	carboxylic acid transmembrane transporter activity	Gene Ontology	GO:0046943	26	113	0.0013747
Overall	pollen tube guidance	Gene Ontology	GO:0010183	11	28	0.00139308
Overall	taxis	Gene Ontology	GO:0042330	11	28	0.00139308
Overall	early endosome	Gene Ontology	GO:0005769	11	28	0.00139308
Overall	chemotaxis	Gene Ontology	GO:0006935	11	28	0.00139308
Overall	positive chemotaxis	Gene Ontology	GO:0050918	11	28	0.00139308
Overall	positive regulation of macromolecule metabolic process	Gene Ontology	GO:0010604	109	720	0.00139941
Overall	RNA polymerase complex	Gene Ontology	GO:0030880	24	101	0.00143009
Overall	identical protein binding	Gene Ontology	GO:0042802	49	269	0.00143249
Overall	seedling development	Gene Ontology	GO:0090351	36	179	0.00144404
Overall	glycerolipid metabolic process	Gene Ontology	GO:0046486	31	146	0.00147514
Overall	proton transmembrane transporter activity	Gene Ontology	GO:0015078	38	193	0.00149306
Overall	flower development	Gene Ontology	GO:0009908	76	468	0.00149482
Overall	regulation of lipid biosynthetic process	Gene Ontology	GO:0046890	15	49	0.00153351
Overall	zinc ion transmembrane transporter activity	Gene Ontology	GO:0005385	10	24	0.0016204
Overall	secretion	Gene Ontology	GO:0046903	19	72	0.00162667
Overall	nuclear DNA-directed RNA polymerase complex	Gene Ontology	GO:0055029	22	90	0.00163573
Overall	protein transport	Gene Ontology	GO:0015031	100	654	0.00163573
Overall	GTPase activity	Gene Ontology	GO:0003924	41	215	0.00164458
Overall	nuclear outer membrane-endoplasmic reticulum membrane network	Gene Ontology	GO:0042175	71	433	0.00168929
Overall	cellular homeostasis	Gene Ontology	GO:0019725	55	315	0.0016981
Overall	tertiary alcohol metabolic process	Gene Ontology	GO:1902644	12	34	0.00171827
Overall	apocarotenoid metabolic process	Gene Ontology	GO:0043288	12	34	0.00171827
Overall	abscisic acid metabolic process	Gene Ontology	GO:0009687	12	34	0.00171827
Overall	small GTPase binding	Gene Ontology	GO:0031267	17	61	0.00172828
Overall	Ras GTPase binding	Gene Ontology	GO:0017016	17	61	0.00172828
Overall	intracellular signal transduction	Gene Ontology	GO:0035556	82	517	0.00173594
Overall	establishment of protein localization	Gene Ontology	GO:0045184	100	656	0.00174971
Overall	auxin transport	Gene Ontology	GO:0060918	22	91	0.00180831
Overall	extracellular structure organization	Gene Ontology	GO:0043062	9	20	0.00180886
Overall	extracellular matrix organization	Gene Ontology	GO:0030198	9	20	0.00180886
Overall	ATPase activity, coupled	Gene Ontology	GO:0042623	44	238	0.00186643
Overall	lytic vacuole	Gene Ontology	GO:0000323	14	45	0.00188651
Overall	response to ethylene	Gene Ontology	GO:0009723	49	274	0.00192063
Overall	endoplasmic reticulum membrane	Gene Ontology	GO:0005789	70	429	0.00196796
Overall	post-embryonic plant organ development	Gene Ontology	GO:0090696	33	163	0.00196796
Overall	zinc ion transmembrane transport	Gene Ontology	GO:0071577	10	25	0.00196796
Overall	cellular response to iron ion starvation	Gene Ontology	GO:0010106	5	5	0.00196796
Overall	cellular response to chitin	Gene Ontology	GO:0071323	5	5	0.00196796
Overall	myo-inositol transmembrane transporter activity	Gene Ontology	GO:0005365	5	5	0.00196796
Overall	floral organ senescence	Gene Ontology	GO:0080187	5	5	0.00196796
Overall	myo-inositol transport	Gene Ontology	GO:0015798	5	5	0.00196796
Overall	acylglycerol catabolic process	Gene Ontology	GO:0046464	5	5	0.00196796
Overall	neutral lipid catabolic process	Gene Ontology	GO:0046461	5	5	0.00196796
Overall	mismatch repair	Gene Ontology	GO:0006298	7	12	0.00198233
Overall	response to inorganic substance	Gene Ontology	GO:0010035	125	857	0.00198233
Overall	positive regulation of protein metabolic process	Gene Ontology	GO:0051247	34	170	0.00198631
Overall	oxidoreductase activity, acting on NAD(P)H	Gene Ontology	GO:0016651	19	74	0.00201521
Overall	pyruvate metabolic process	Gene Ontology	GO:0006090	20	80	0.00201629
Overall	regulation of catalytic activity	Gene Ontology	GO:0050790	82	521	0.00201886
Overall	stomatal movement	Gene Ontology	GO:0010118	27	124	0.00204349
Overall	intrinsic component of plasma membrane	Gene Ontology	GO:0031226	54	312	0.00209726
Overall	positive regulation of cellular protein metabolic process	Gene Ontology	GO:0032270	33	164	0.00209742
Overall	phospholipase activity	Gene Ontology	GO:0004620	16	57	0.00212304
Overall	DNA duplex unwinding	Gene Ontology	GO:0032508	14	46	0.00216123
Overall	hormone transport	Gene Ontology	GO:0009914	22	93	0.00218867
Overall	organonitrogen compound biosynthetic process	Gene Ontology	GO:1901566	183	1331	0.00221368
Overall	carboxylic acid transmembrane transport	Gene Ontology	GO:1905039	27	125	0.00222775
Overall	organic acid transmembrane transport	Gene Ontology	GO:1903825	27	125	0.00222775
Overall	organic hydroxy compound transport	Gene Ontology	GO:0015850	9	21	0.00224318
Overall	acylglycerol biosynthetic process	Gene Ontology	GO:0046463	9	21	0.00224318
Overall	neutral lipid biosynthetic process	Gene Ontology	GO:0046460	9	21	0.00224318
Overall	post-embryonic plant morphogenesis	Gene Ontology	GO:0090698	33	165	0.00224774
Overall	regionalization	Gene Ontology	GO:0003002	30	145	0.002268
Overall	mRNA processing	Gene Ontology	GO:0006397	55	321	0.00227465
Overall	electron transport chain	Gene Ontology	GO:0022900	36	186	0.00233635
Overall	regulation of developmental process	Gene Ontology	GO:0050793	98	649	0.00235227
Overall	proton transmembrane transport	Gene Ontology	GO:1902600	39	207	0.00236719
Overall	regulation of auxin mediated signaling pathway	Gene Ontology	GO:0010928	12	36	0.00237255
Overall	negative regulation of multicellular organismal process	Gene Ontology	GO:0051241	25	113	0.00239554
Overall	trichome morphogenesis	Gene Ontology	GO:0010090	16	58	0.00239554
Overall	quercetin 3-O-glucosyltransferase activity	Gene Ontology	GO:0080043	16	58	0.00239554
Overall	Rab GTPase binding	Gene Ontology	GO:0017137	11	31	0.00241092
Overall	DNA geometric change	Gene Ontology	GO:0032392	14	47	0.00247526
Overall	nucleoplasm	Gene Ontology	GO:0005654	65	397	0.00247526
Overall	plant epidermis morphogenesis	Gene Ontology	GO:0090626	20	82	0.00247526
Overall	intracellular transport	Gene Ontology	GO:0046907	87	565	0.00247526
Overall	90S preribosome	Gene Ontology	GO:0030686	8	17	0.00247526
Overall	acylglycerol O-acyltransferase activity	Gene Ontology	GO:0016411	8	17	0.00247526
Overall	circadian rhythm	Gene Ontology	GO:0007623	26	120	0.00249827
Overall	cell differentiation	Gene Ontology	GO:0030154	99	659	0.00251016
Overall	cellular response to biotic stimulus	Gene Ontology	GO:0071216	6	9	0.00251016
Overall	isopentenyl diphosphate biosynthetic process, methylerythritol 4-phosphate pathway	Gene Ontology	GO:0019288	6	9	0.00251016
Overall	protein modification by small protein conjugation or removal	Gene Ontology	GO:0070647	109	739	0.00261635
Overall	ligand-gated cation channel activity	Gene Ontology	GO:0099094	7	13	0.00261635
Overall	phospholipase A1 activity	Gene Ontology	GO:0008970	7	13	0.00261635
Overall	DNA-directed RNA polymerase complex	Gene Ontology	GO:0000428	22	95	0.00261673
Overall	cellular response to external stimulus	Gene Ontology	GO:0071496	37	195	0.00265376
Overall	cell development	Gene Ontology	GO:0048468	51	295	0.0026617
Overall	hydrolase activity, acting on acid phosphorus-nitrogen bonds	Gene Ontology	GO:0016825	31	154	0.0026617
Overall	serine hydrolase activity	Gene Ontology	GO:0017171	31	154	0.0026617
Overall	serine-type peptidase activity	Gene Ontology	GO:0008236	31	154	0.0026617
Overall	potassium ion transport	Gene Ontology	GO:0006813	21	89	0.00266504
Overall	DNA-binding transcription factor activity	Gene Ontology	GO:0003700	195	1439	0.0026901
Overall	secondary metabolite biosynthetic process	Gene Ontology	GO:0044550	32	161	0.00270288
Overall	voltage-gated potassium channel activity	Gene Ontology	GO:0005249	9	22	0.00273845
Overall	hydro-lyase activity	Gene Ontology	GO:0016836	18	71	0.00275109
Overall	2-oxoglutarate-dependent dioxygenase activity	Gene Ontology	GO:0016706	14	48	0.00281052
Overall	jasmonic acid mediated signaling pathway	Gene Ontology	GO:0009867	22	96	0.0028707
Overall	generation of precursor metabolites and energy	Gene Ontology	GO:0006091	69	431	0.00290038
Overall	positive regulation of cellular biosynthetic process	Gene Ontology	GO:0031328	85	554	0.00291547
Overall	fatty acid biosynthetic process	Gene Ontology	GO:0006633	29	142	0.00297331
Overall	ethylene-activated signaling pathway	Gene Ontology	GO:0009873	35	183	0.0029933
Overall	alditol:NADP+ 1-oxidoreductase activity	Gene Ontology	GO:0004032	5	6	0.0029933
Overall	polyol transport	Gene Ontology	GO:0015791	5	6	0.0029933
Overall	glucose transmembrane transporter activity	Gene Ontology	GO:0005355	5	6	0.0029933
Overall	diacylglycerol metabolic process	Gene Ontology	GO:0046339	5	6	0.0029933
Overall	cellular response to molecule of bacterial origin	Gene Ontology	GO:0071219	5	6	0.0029933
Overall	polyol transmembrane transporter activity	Gene Ontology	GO:0015166	5	6	0.0029933
Overall	organelle organization	Gene Ontology	GO:0006996	192	1419	0.00299542
Overall	ligase activity, forming carbon-sulfur bonds	Gene Ontology	GO:0016877	13	43	0.00300166
Overall	aspartic-type peptidase activity	Gene Ontology	GO:0070001	16	60	0.00300218
Overall	aspartic-type endopeptidase activity	Gene Ontology	GO:0004190	16	60	0.00300218
Overall	root development	Gene Ontology	GO:0048364	72	455	0.00300595
Overall	cellular amide metabolic process	Gene Ontology	GO:0043603	115	792	0.00304376
Overall	methylation	Gene Ontology	GO:0032259	58	350	0.00310769
Overall	root system development	Gene Ontology	GO:0022622	72	456	0.00313971
Overall	carboxylic acid transport	Gene Ontology	GO:0046942	29	143	0.0031604
Overall	organic acid transport	Gene Ontology	GO:0015849	29	143	0.0031604
Overall	regulation of innate immune response	Gene Ontology	GO:0045088	24	110	0.0031604
Overall	cellular response to extracellular stimulus	Gene Ontology	GO:0031668	36	191	0.0031604
Overall	regulation of supramolecular fiber organization	Gene Ontology	GO:1902903	12	38	0.00316622
Overall	lipid homeostasis	Gene Ontology	GO:0055088	12	38	0.00316622
Overall	molecular function regulator	Gene Ontology	GO:0098772	73	465	0.00330903
Overall	response to molecule of bacterial origin	Gene Ontology	GO:0002237	11	33	0.00330903
Overall	regulation of actin filament length	Gene Ontology	GO:0030832	11	33	0.00330903
Overall	regulation of actin filament organization	Gene Ontology	GO:0110053	11	33	0.00330903
Overall	regulation of actin polymerization or depolymerization	Gene Ontology	GO:0008064	11	33	0.00330903
Overall	RNA modification	Gene Ontology	GO:0009451	49	285	0.00332398
Overall	response to drug	Gene Ontology	GO:0042493	74	473	0.00333372
Overall	anatomical structure formation involved in morphogenesis	Gene Ontology	GO:0048646	36	192	0.00335523
Overall	regulation of intracellular protein transport	Gene Ontology	GO:0033157	7	14	0.00335523
Overall	regulation of cellular component size	Gene Ontology	GO:0032535	17	67	0.00337417
Overall	regulation of anatomical structure size	Gene Ontology	GO:0090066	17	67	0.00337417
Overall	negative regulation of developmental process	Gene Ontology	GO:0051093	26	124	0.00338443
Overall	diacylglycerol O-acyltransferase activity	Gene Ontology	GO:0004144	6	10	0.00339837
Overall	positive regulation of flavonoid biosynthetic process	Gene Ontology	GO:0009963	6	10	0.00339837
Overall	xenobiotic transmembrane transporter activity	Gene Ontology	GO:0042910	13	44	0.00340503
Overall	lipid binding	Gene Ontology	GO:0008289	42	235	0.00342841
Overall	nuclear chromosome	Gene Ontology	GO:0000228	27	131	0.00347264
Overall	antibiotic metabolic process	Gene Ontology	GO:0016999	32	165	0.00350457
Overall	response to organonitrogen compound	Gene Ontology	GO:0010243	39	214	0.00351063
Overall	protein modification by small protein conjugation	Gene Ontology	GO:0032446	101	686	0.00356537
Overall	ubiquitin-like protein binding	Gene Ontology	GO:0032182	14	50	0.00358657
Overall	mRNA metabolic process	Gene Ontology	GO:0016071	64	399	0.00364928
Overall	glycerolipid biosynthetic process	Gene Ontology	GO:0045017	19	80	0.00366118
Overall	transcription regulator activity	Gene Ontology	GO:0140110	204	1530	0.00380101
Overall	protein ubiquitination	Gene Ontology	GO:0016567	98	665	0.00393302
Overall	phosphorelay signal transduction system	Gene Ontology	GO:0000160	40	223	0.00394939
Overall	regulation of protein metabolic process	Gene Ontology	GO:0051246	86	571	0.00400736
Overall	aging	Gene Ontology	GO:0007568	31	160	0.0040133
Overall	zinc ion transport	Gene Ontology	GO:0006829	10	29	0.0040133
Overall	oxidoreductase activity, acting on diphenols and related substances as donors, oxygen as acceptor	Gene Ontology	GO:0016682	9	24	0.00401498
Overall	brassinosteroid metabolic process	Gene Ontology	GO:0016131	9	24	0.00401498
Overall	regulation of immune response	Gene Ontology	GO:0050776	24	113	0.00403807
Overall	cellular response to jasmonic acid stimulus	Gene Ontology	GO:0071395	22	100	0.00403807
Overall	protein localization	Gene Ontology	GO:0008104	114	794	0.00408175
Overall	polysaccharide metabolic process	Gene Ontology	GO:0005976	66	417	0.0041071
Overall	amino acid transmembrane transporter activity	Gene Ontology	GO:0015171	18	75	0.00413542
Overall	regulation of lipid metabolic process	Gene Ontology	GO:0019216	16	63	0.00421343
Overall	locomotion	Gene Ontology	GO:0040011	12	40	0.00422392
Overall	positive regulation of cellular component biogenesis	Gene Ontology	GO:0044089	12	40	0.00422392
Overall	leaf development	Gene Ontology	GO:0048366	56	342	0.00422392
Overall	cell wall macromolecule metabolic process	Gene Ontology	GO:0044036	30	154	0.00422392
Overall	seed germination	Gene Ontology	GO:0009845	30	154	0.00422392
Overall	rhythmic process	Gene Ontology	GO:0048511	26	127	0.00426116
Overall	cellular response to ethylene stimulus	Gene Ontology	GO:0071369	35	189	0.00428271
Overall	glycerolipid catabolic process	Gene Ontology	GO:0046503	5	7	0.00431702
Overall	oxidoreductase activity, acting on CH or CH2 groups	Gene Ontology	GO:0016725	5	7	0.00431702
Overall	glucose transmembrane transport	Gene Ontology	GO:1904659	5	7	0.00431702
Overall	transcription regulatory region DNA binding	Gene Ontology	GO:0044212	112	781	0.00444079
Overall	regulatory region nucleic acid binding	Gene Ontology	GO:0001067	112	781	0.00444079
Overall	xenobiotic transport	Gene Ontology	GO:0042908	13	46	0.00444079
Overall	jasmonic acid metabolic process	Gene Ontology	GO:0009694	13	46	0.00444079
Overall	cellular hormone metabolic process	Gene Ontology	GO:0034754	13	46	0.00444079
Overall	production of siRNA involved in RNA interference	Gene Ontology	GO:0030422	11	35	0.0044762
Overall	plant-type vacuole	Gene Ontology	GO:0000325	30	155	0.00450424
Overall	response to virus	Gene Ontology	GO:0009615	18	76	0.00453116
Overall	glyceraldehyde-3-phosphate metabolic process	Gene Ontology	GO:0019682	6	11	0.00453116
Overall	negative regulation of cell growth	Gene Ontology	GO:0030308	6	11	0.00453116
Overall	enzyme activator activity	Gene Ontology	GO:0008047	23	108	0.00453116
Overall	pattern specification process	Gene Ontology	GO:0007389	33	176	0.00453193
Overall	negative regulation of defense response	Gene Ontology	GO:0031348	15	58	0.0046417
Overall	secretion by cell	Gene Ontology	GO:0032940	16	64	0.00464181
Overall	positive regulation of response to external stimulus	Gene Ontology	GO:0032103	20	89	0.00470165
Overall	cellular response to DNA damage stimulus	Gene Ontology	GO:0006974	48	285	0.00473759
Overall	S-adenosylmethionine-dependent methyltransferase activity	Gene Ontology	GO:0008757	29	149	0.00476985
Overall	regulation of organelle organization	Gene Ontology	GO:0033043	35	191	0.0048064
Overall	RNA interference	Gene Ontology	GO:0016246	12	41	0.00480949
Overall	organic anion transmembrane transporter activity	Gene Ontology	GO:0008514	31	163	0.00481953
Overall	amino acid transmembrane transport	Gene Ontology	GO:0003333	19	83	0.00483268
Overall	response to gravity	Gene Ontology	GO:0009629	19	83	0.00483268
Overall	positive regulation of transferase activity	Gene Ontology	GO:0051347	19	83	0.00483268
Overall	Golgi subcompartment	Gene Ontology	GO:0098791	57	353	0.00486461
Overall	cellular response to starvation	Gene Ontology	GO:0009267	26	129	0.00489143
Overall	enzyme regulator activity	Gene Ontology	GO:0030234	63	399	0.00494647
Overall	steroid metabolic process	Gene Ontology	GO:0008202	18	77	0.00496552
Overall	O-acetyltransferase activity	Gene Ontology	GO:0016413	13	47	0.00501266
Overall	flavonoid biosynthetic process	Gene Ontology	GO:0009813	17	71	0.00507958
Overall	negative regulation of cellular metabolic process	Gene Ontology	GO:0031324	69	446	0.00511979
Overall	condensed chromosome	Gene Ontology	GO:0000793	14	53	0.00511979
Overall	production of small RNA involved in gene silencing by RNA	Gene Ontology	GO:0070918	14	53	0.00511979
Overall	dsRNA processing	Gene Ontology	GO:0031050	14	53	0.00511979
Overall	small-subunit processome	Gene Ontology	GO:0032040	11	36	0.00513261
Overall	Golgi cis cisterna	Gene Ontology	GO:0000137	11	36	0.00513261
Overall	carbohydrate catabolic process	Gene Ontology	GO:0016052	45	265	0.00522237
Overall	response to nitrogen compound	Gene Ontology	GO:1901698	45	265	0.00522237
Overall	amino acid transport	Gene Ontology	GO:0006865	19	84	0.00528732
Overall	pollen tube growth	Gene Ontology	GO:0009860	27	137	0.00529443
Overall	plant-type cell wall	Gene Ontology	GO:0009505	36	200	0.00529443
Overall	negative regulation of photosynthesis	Gene Ontology	GO:1905156	7	16	0.00529443
Overall	regulation of peptide transport	Gene Ontology	GO:0090087	7	16	0.00529443
Overall	regulation of protein transport	Gene Ontology	GO:0051223	7	16	0.00529443
Overall	regulation of establishment of protein localization	Gene Ontology	GO:0070201	7	16	0.00529443
Overall	hydroquinone:oxygen oxidoreductase activity	Gene Ontology	GO:0052716	7	16	0.00529443
Overall	positive regulation of phosphate metabolic process	Gene Ontology	GO:0045937	18	78	0.00541986
Overall	positive regulation of phosphorus metabolic process	Gene Ontology	GO:0010562	18	78	0.00541986
Overall	lysosome	Gene Ontology	GO:0005764	12	42	0.00543156
Overall	protein-containing complex assembly	Gene Ontology	GO:0065003	69	448	0.0054744
Overall	iron ion homeostasis	Gene Ontology	GO:0055072	20	91	0.00554165
Overall	ketone biosynthetic process	Gene Ontology	GO:0042181	9	26	0.00557461
Overall	jasmonic acid biosynthetic process	Gene Ontology	GO:0009695	9	26	0.00557461
Overall	potassium channel activity	Gene Ontology	GO:0005267	9	26	0.00557461
Overall	maturation of LSU-rRNA	Gene Ontology	GO:0000470	9	26	0.00557461
Overall	sodium:proton antiporter activity	Gene Ontology	GO:0015385	9	26	0.00557461
Overall	small molecule catabolic process	Gene Ontology	GO:0044282	36	201	0.00557461
Overall	negative regulation of phosphatase activity	Gene Ontology	GO:0010923	8	21	0.00557461
Overall	negative regulation of dephosphorylation	Gene Ontology	GO:0035305	8	21	0.00557461
Overall	regulation of secondary metabolic process	Gene Ontology	GO:0043455	14	54	0.0056832
Overall	methylglyoxal catabolic process to lactate	Gene Ontology	GO:0061727	5	8	0.00595781
Overall	response to water	Gene Ontology	GO:0009415	57	358	0.00596644
Overall	negative regulation of protein metabolic process	Gene Ontology	GO:0051248	26	132	0.00602171
Overall	protein homodimerization activity	Gene Ontology	GO:0042803	28	146	0.00613561
Overall	cell tip growth	Gene Ontology	GO:0009932	30	160	0.00615543
Overall	guanyl ribonucleotide binding	Gene Ontology	GO:0032561	41	239	0.00615543
Overall	guanyl nucleotide binding	Gene Ontology	GO:0019001	41	239	0.00615543
Overall	regulation of protein modification process	Gene Ontology	GO:0031399	41	239	0.00615543
Overall	regulation of growth	Gene Ontology	GO:0040008	46	276	0.00616904
Overall	salicylic acid metabolic process	Gene Ontology	GO:0009696	12	43	0.00616904
Overall	positive regulation of response to biotic stimulus	Gene Ontology	GO:0002833	19	86	0.00627269
Overall	DNA helicase activity	Gene Ontology	GO:0003678	10	32	0.0062875
Overall	indole-containing compound biosynthetic process	Gene Ontology	GO:0042435	13	49	0.00632061
Overall	ubiquitin binding	Gene Ontology	GO:0043130	13	49	0.00632061
Overall	xylem and phloem pattern formation	Gene Ontology	GO:0010051	15	61	0.00633114
Overall	embryo sac development	Gene Ontology	GO:0009553	25	126	0.00634307
Overall	positive regulation of organelle organization	Gene Ontology	GO:0010638	14	55	0.00635496
Overall	DNA repair	Gene Ontology	GO:0006281	44	262	0.00640584
Overall	cellular component assembly	Gene Ontology	GO:0022607	96	666	0.00643778
Overall	regulation of seedling development	Gene Ontology	GO:1900140	18	80	0.00648104
Overall	regulation of phosphorus metabolic process	Gene Ontology	GO:0051174	37	211	0.00649
Overall	regulation of phosphate metabolic process	Gene Ontology	GO:0019220	37	211	0.00649
Overall	triterpenoid metabolic process	Gene Ontology	GO:0006722	7	17	0.00649
Overall	aldehyde catabolic process	Gene Ontology	GO:0046185	7	17	0.00649
Overall	brassinosteroid homeostasis	Gene Ontology	GO:0010268	7	17	0.00649
Overall	auxin efflux transmembrane transporter activity	Gene Ontology	GO:0010329	7	17	0.00649
Overall	phenylpropanoid catabolic process	Gene Ontology	GO:0046271	7	17	0.00649
Overall	lignin catabolic process	Gene Ontology	GO:0046274	7	17	0.00649
Overall	cell cycle	Gene Ontology	GO:0007049	75	500	0.00651321
Overall	phytosteroid metabolic process	Gene Ontology	GO:0016128	9	27	0.00651559
Overall	regulation of multi-organism process	Gene Ontology	GO:0043900	45	270	0.00651559
Overall	chromosome	Gene Ontology	GO:0005694	51	315	0.00651954
Overall	response to salicylic acid	Gene Ontology	GO:0009751	35	197	0.00660247
Overall	response to antibiotic	Gene Ontology	GO:0046677	44	263	0.00663026
Overall	phosphatase inhibitor activity	Gene Ontology	GO:0019212	8	22	0.00663026
Overall	regulation of anthocyanin metabolic process	Gene Ontology	GO:0031537	8	22	0.00663026
Overall	oxylipin metabolic process	Gene Ontology	GO:0031407	8	22	0.00663026
Overall	negative regulation of macromolecule metabolic process	Gene Ontology	GO:0010605	85	580	0.00670944
Overall	positive regulation of multi-organism process	Gene Ontology	GO:0043902	19	87	0.00672096
Overall	organophosphate metabolic process	Gene Ontology	GO:0019637	72	478	0.00684534
Overall	intracellular protein transport	Gene Ontology	GO:0006886	71	471	0.00707907
Overall	chloroplast inner membrane	Gene Ontology	GO:0009706	17	75	0.00726259
Overall	positive regulation of phosphorylation	Gene Ontology	GO:0042327	17	75	0.00726259
Overall	response to heat	Gene Ontology	GO:0009408	36	206	0.00726259
Overall	galactose transmembrane transport	Gene Ontology	GO:0015757	4	5	0.00726259
Overall	L-lysine transport	Gene Ontology	GO:1902022	4	5	0.00726259
Overall	arginine transmembrane transporter activity	Gene Ontology	GO:0015181	4	5	0.00726259
Overall	L-lysine transmembrane transport	Gene Ontology	GO:1903401	4	5	0.00726259
Overall	galactose transmembrane transporter activity	Gene Ontology	GO:0005354	4	5	0.00726259
Overall	arginine transmembrane transport	Gene Ontology	GO:1903826	4	5	0.00726259
Overall	tryptophan synthase activity	Gene Ontology	GO:0004834	4	5	0.00726259
Overall	L-lysine transmembrane transporter activity	Gene Ontology	GO:0015189	4	5	0.00726259
Overall	positive regulation of secondary metabolite biosynthetic process	Gene Ontology	GO:1900378	4	5	0.00726259
Overall	postreplication repair	Gene Ontology	GO:0006301	6	13	0.00726259
Overall	endoplasmic reticulum exit site	Gene Ontology	GO:0070971	6	13	0.00726259
Overall	regulation of defense response to virus	Gene Ontology	GO:0050688	6	13	0.00726259
Overall	RNA polymerase IV complex	Gene Ontology	GO:0000418	6	13	0.00726259
Overall	acylglycerol lipase activity	Gene Ontology	GO:0047372	6	13	0.00726259
Overall	photoinhibition	Gene Ontology	GO:0010205	6	13	0.00726259
Overall	regulation of immune effector process	Gene Ontology	GO:0002697	6	13	0.00726259
Overall	somatic embryogenesis	Gene Ontology	GO:0010262	6	13	0.00726259
Overall	response to amino acid	Gene Ontology	GO:0043200	6	13	0.00726259
Overall	negative regulation of photosynthesis, light reaction	Gene Ontology	GO:0043155	6	13	0.00726259
Overall	proteolysis involved in cellular protein catabolic process	Gene Ontology	GO:0051603	73	488	0.00727244
Overall	cellular protein catabolic process	Gene Ontology	GO:0044257	74	496	0.00730396
Overall	positive regulation of kinase activity	Gene Ontology	GO:0033674	16	69	0.00737263
Overall	positive regulation of protein kinase activity	Gene Ontology	GO:0045860	16	69	0.00737263
Overall	regulation of defense response to bacterium	Gene Ontology	GO:1900424	11	39	0.00746719
Overall	translation	Gene Ontology	GO:0006412	88	608	0.00752547
Overall	cellular response to nutrient levels	Gene Ontology	GO:0031669	29	157	0.00767464
Overall	carbohydrate:cation symporter activity	Gene Ontology	GO:0005402	12	45	0.00767806
Overall	carbohydrate:proton symporter activity	Gene Ontology	GO:0005351	12	45	0.00767806
Overall	post-embryonic plant organ morphogenesis	Gene Ontology	GO:0090697	21	102	0.00769742
Overall	DNA strand elongation involved in DNA replication	Gene Ontology	GO:0006271	5	9	0.00769742
Overall	alcohol dehydrogenase (NADP+) activity	Gene Ontology	GO:0008106	5	9	0.00769742
Overall	ketone catabolic process	Gene Ontology	GO:0042182	5	9	0.00769742
Overall	positive regulation of hormone biosynthetic process	Gene Ontology	GO:0046886	5	9	0.00769742
Overall	methylglyoxal catabolic process	Gene Ontology	GO:0051596	5	9	0.00769742
Overall	DNA strand elongation	Gene Ontology	GO:0022616	5	9	0.00769742
Overall	negative regulation of leaf development	Gene Ontology	GO:1905622	5	9	0.00769742
Overall	negative regulation of leaf senescence	Gene Ontology	GO:1900056	5	9	0.00769742
Overall	hexose transmembrane transporter activity	Gene Ontology	GO:0015149	5	9	0.00769742
Overall	methylglyoxal metabolic process	Gene Ontology	GO:0009438	5	9	0.00769742
Overall	cGMP binding	Gene Ontology	GO:0030553	7	18	0.00769742
Overall	positive regulation of defense response to bacterium	Gene Ontology	GO:1900426	7	18	0.00769742
Overall	cAMP binding	Gene Ontology	GO:0030552	7	18	0.00769742
Overall	cyclic nucleotide binding	Gene Ontology	GO:0030551	7	18	0.00769742
Overall	regulation of transport	Gene Ontology	GO:0051049	24	123	0.00802069
Overall	response to oxygen levels	Gene Ontology	GO:0070482	40	238	0.00815139
Overall	serine-type endopeptidase activity	Gene Ontology	GO:0004252	21	103	0.00827296
Overall	response to extracellular stimulus	Gene Ontology	GO:0009991	41	246	0.00840743
Overall	methyltransferase activity	Gene Ontology	GO:0008168	45	276	0.00843011
Overall	sodium ion transmembrane transporter activity	Gene Ontology	GO:0015081	11	40	0.00843011
Overall	sodium ion transmembrane transport	Gene Ontology	GO:0035725	11	40	0.00843011
Overall	peptide biosynthetic process	Gene Ontology	GO:0043043	88	612	0.00843011
Overall	phenol-containing compound metabolic process	Gene Ontology	GO:0018958	14	58	0.00847103
Overall	cation channel activity	Gene Ontology	GO:0005261	17	77	0.00849706
Overall	regulation of seed germination	Gene Ontology	GO:0010029	17	77	0.00849706
Overall	response to toxic substance	Gene Ontology	GO:0009636	48	299	0.0085154
Overall	regulation of generation of precursor metabolites and energy	Gene Ontology	GO:0043467	9	29	0.00869097
Overall	nucleoside-triphosphatase regulator activity	Gene Ontology	GO:0060589	16	71	0.00885355
Overall	cellular lipid catabolic process	Gene Ontology	GO:0044242	18	84	0.00889464
Overall	reactive oxygen species metabolic process	Gene Ontology	GO:0072593	30	167	0.00905432
Overall	regulation of protein serine/threonine phosphatase activity	Gene Ontology	GO:0080163	6	14	0.00905432
Overall	long-chain-alcohol O-fatty-acyltransferase activity	Gene Ontology	GO:0047196	6	14	0.00905432
Overall	regulation of abscisic acid biosynthetic process	Gene Ontology	GO:0010115	6	14	0.00905432
Overall	adaxial/abaxial axis specification	Gene Ontology	GO:0009943	8	24	0.00919414
Overall	positive regulation of gene expression	Gene Ontology	GO:0010628	78	535	0.00924126
Overall	maturation of SSU-rRNA	Gene Ontology	GO:0030490	10	35	0.00926185
Overall	trichome differentiation	Gene Ontology	GO:0010026	17	78	0.00928133
Overall	plastid inner membrane	Gene Ontology	GO:0009528	17	78	0.00928133
Overall	transferase activity, transferring one-carbon groups	Gene Ontology	GO:0016741	46	286	0.00934879
Overall	sterol metabolic process	Gene Ontology	GO:0016125	14	59	0.00934879
Overall	auxin efflux	Gene Ontology	GO:0010315	7	19	0.00934879
Overall	RNA polymerase III complex	Gene Ontology	GO:0005666	7	19	0.00934879
Overall	protein-containing complex subunit organization	Gene Ontology	GO:0043933	75	512	0.00944845
Overall	positive regulation of RNA metabolic process	Gene Ontology	GO:0051254	75	512	0.00944845
Overall	floral organ morphogenesis	Gene Ontology	GO:0048444	11	41	0.00950342
Overall	regulation of protein complex assembly	Gene Ontology	GO:0043254	13	53	0.00950856
Overall	indole-containing compound metabolic process	Gene Ontology	GO:0042430	16	72	0.00965009
Overall	alcohol metabolic process	Gene Ontology	GO:0006066	25	133	0.00985342
Overall	primary active transmembrane transporter activity	Gene Ontology	GO:0015399	31	176	0.0100154
Overall	positive regulation of hormone metabolic process	Gene Ontology	GO:0032352	5	10	0.0101332
Overall	acidic amino acid transport	Gene Ontology	GO:0015800	5	10	0.0101332
Overall	phloem development	Gene Ontology	GO:0010088	5	10	0.0101332
Overall	hexose transmembrane transport	Gene Ontology	GO:0008645	5	10	0.0101332
Overall	regulation of hydrolase activity	Gene Ontology	GO:0051336	29	162	0.0102241
Overall	terpenoid transport	Gene Ontology	GO:0046865	4	6	0.0102241
Overall	nuclear export signal receptor activity	Gene Ontology	GO:0005049	4	6	0.0102241
Overall	isoprenoid transport	Gene Ontology	GO:0046864	4	6	0.0102241
Overall	arginine transport	Gene Ontology	GO:0015809	4	6	0.0102241
Overall	lignan metabolic process	Gene Ontology	GO:0009806	4	6	0.0102241
Overall	cellular potassium ion homeostasis	Gene Ontology	GO:0030007	4	6	0.0102241
Overall	lignan biosynthetic process	Gene Ontology	GO:0009807	4	6	0.0102241
Overall	translesion synthesis	Gene Ontology	GO:0019985	4	6	0.0102241
Overall	ATPase-coupled transmembrane transporter activity	Gene Ontology	GO:0042626	28	155	0.0102579
Overall	divalent inorganic cation transmembrane transporter activity	Gene Ontology	GO:0072509	10	36	0.0104756
Overall	hormone binding	Gene Ontology	GO:0042562	10	36	0.0104756
Overall	positive regulation of protein phosphorylation	Gene Ontology	GO:0001934	16	73	0.0104921
Overall	cytokinesis by cell plate formation	Gene Ontology	GO:0000911	13	54	0.0105114
Overall	regulation of catabolic process	Gene Ontology	GO:0009894	19	93	0.0106479
Overall	cellular response to drug	Gene Ontology	GO:0035690	19	93	0.0106479
Overall	cellular iron ion homeostasis	Gene Ontology	GO:0006879	11	42	0.0106511
Overall	maturation of SSU-rRNA from tricistronic rRNA transcript (SSU-rRNA, 5.8S rRNA, LSU-rRNA)	Gene Ontology	GO:0000462	8	25	0.0106558
Overall	regulation of cellular protein metabolic process	Gene Ontology	GO:0032268	80	556	0.0106558
Overall	cytosolic ribosome	Gene Ontology	GO:0022626	47	297	0.0107102
Overall	DNA conformation change	Gene Ontology	GO:0071103	20	100	0.0108269
Overall	carboxylic ester hydrolase activity	Gene Ontology	GO:0052689	35	207	0.0108491
Overall	export from cell	Gene Ontology	GO:0140352	17	80	0.0108774
Overall	activation of protein kinase activity	Gene Ontology	GO:0032147	15	67	0.0108774
Overall	response to decreased oxygen levels	Gene Ontology	GO:0036293	39	237	0.0109628
Overall	response to fructose	Gene Ontology	GO:0009750	6	15	0.0110146
Overall	brassinosteroid biosynthetic process	Gene Ontology	GO:0016132	7	20	0.0110146
Overall	protein phosphatase inhibitor activity	Gene Ontology	GO:0004864	7	20	0.0110146
Overall	negative regulation of protein dephosphorylation	Gene Ontology	GO:0035308	7	20	0.0110146
Overall	steroid hormone biosynthetic process	Gene Ontology	GO:0120178	7	20	0.0110146
Overall	negative regulation of phosphoprotein phosphatase activity	Gene Ontology	GO:0032515	7	20	0.0110146
Overall	auxin transmembrane transporter activity	Gene Ontology	GO:0080161	7	20	0.0110146
Overall	oxylipin biosynthetic process	Gene Ontology	GO:0031408	7	20	0.0110146
Overall	polarity specification of adaxial/abaxial axis	Gene Ontology	GO:0009944	7	20	0.0110146
Overall	floral whorl development	Gene Ontology	GO:0048438	30	171	0.011121
Overall	alcohol binding	Gene Ontology	GO:0043178	9	31	0.0113802
Overall	regulation of response to osmotic stress	Gene Ontology	GO:0047484	9	31	0.0113802
Overall	positive regulation of defense response	Gene Ontology	GO:0031349	19	94	0.0113875
Overall	phospholipid biosynthetic process	Gene Ontology	GO:0008654	21	108	0.0117265
Overall	maintenance of location	Gene Ontology	GO:0051235	15	68	0.0118965
Overall	regulation of actin cytoskeleton organization	Gene Ontology	GO:0032956	11	43	0.0118965
Overall	regulation of circadian rhythm	Gene Ontology	GO:0042752	11	43	0.0118965
Overall	organophosphate biosynthetic process	Gene Ontology	GO:0090407	44	277	0.0120748
Overall	regulation of post-embryonic development	Gene Ontology	GO:0048580	51	331	0.0121721
Overall	immune effector process	Gene Ontology	GO:0002252	14	62	0.0123997
Overall	positive regulation of macromolecule biosynthetic process	Gene Ontology	GO:0010557	76	529	0.0124244
Overall	organelle inner membrane	Gene Ontology	GO:0019866	46	293	0.0124495
Overall	negative regulation of nitrogen compound metabolic process	Gene Ontology	GO:0051172	60	402	0.0125032
Overall	plant epidermis development	Gene Ontology	GO:0090558	39	240	0.0125752
Overall	nucleotide metabolic process	Gene Ontology	GO:0009117	39	240	0.0125752
Overall	developmental cell growth	Gene Ontology	GO:0048588	32	188	0.0127065
Overall	aldo-keto reductase (NADP) activity	Gene Ontology	GO:0004033	5	11	0.0127869
Overall	regulation of hydrogen peroxide metabolic process	Gene Ontology	GO:0010310	5	11	0.0127869
Overall	ATPase regulator activity	Gene Ontology	GO:0060590	5	11	0.0127869
Overall	response to hypoxia	Gene Ontology	GO:0001666	38	233	0.01287
Overall	mitochondrial envelope	Gene Ontology	GO:0005740	46	294	0.0129393
Overall	positive regulation of cellular component organization	Gene Ontology	GO:0051130	15	69	0.0129712
Overall	acid-thiol ligase activity	Gene Ontology	GO:0016878	9	32	0.0130169
Overall	oxidoreductase activity, acting on diphenols and related substances as donors	Gene Ontology	GO:0016679	9	32	0.0130169
Overall	metal ion:proton antiporter activity	Gene Ontology	GO:0051139	9	32	0.0130169
Overall	ligase activity	Gene Ontology	GO:0016874	33	196	0.0130351
Overall	lipid storage	Gene Ontology	GO:0019915	7	21	0.0130351
Overall	isoprenoid catabolic process	Gene Ontology	GO:0008300	7	21	0.0130351
Overall	regulation of intracellular transport	Gene Ontology	GO:0032386	7	21	0.0130351
Overall	mitochondrial membrane	Gene Ontology	GO:0031966	44	279	0.0130351
Overall	organic anion transport	Gene Ontology	GO:0015711	37	226	0.0130928
Overall	negative regulation of post-embryonic development	Gene Ontology	GO:0048581	19	96	0.0131567
Overall	anion transmembrane transporter activity	Gene Ontology	GO:0008509	45	287	0.0132031
Overall	regulation of actin filament-based process	Gene Ontology	GO:0032970	11	44	0.0132034
Overall	carboxylic acid catabolic process	Gene Ontology	GO:0046395	24	131	0.0132405
Overall	organic acid catabolic process	Gene Ontology	GO:0016054	24	131	0.0132405
Overall	rRNA methyltransferase activity	Gene Ontology	GO:0008649	6	16	0.0132776
Overall	positive regulation of histone modification	Gene Ontology	GO:0031058	6	16	0.0132776
Overall	phragmoplast	Gene Ontology	GO:0009524	16	76	0.0132944
Overall	cellular polysaccharide metabolic process	Gene Ontology	GO:0044264	43	272	0.0133131
Overall	response to starvation	Gene Ontology	GO:0042594	28	160	0.0134017
Overall	response to water deprivation	Gene Ontology	GO:0009414	53	350	0.0136731
Overall	DNA synthesis involved in DNA repair	Gene Ontology	GO:0000731	4	7	0.0136731
Overall	cell plate formation involved in plant-type cell wall biogenesis	Gene Ontology	GO:0009920	4	7	0.0136731
Overall	xanthophyll biosynthetic process	Gene Ontology	GO:0016123	4	7	0.0136731
Overall	quercetin 4'-O-glucosyltransferase activity	Gene Ontology	GO:0080046	4	7	0.0136731
Overall	xylan O-acetyltransferase activity	Gene Ontology	GO:1990538	4	7	0.0136731
Overall	petal morphogenesis	Gene Ontology	GO:0048446	4	7	0.0136731
Overall	regulation of ribosome biogenesis	Gene Ontology	GO:0090069	4	7	0.0136731
Overall	peptide metabolic process	Gene Ontology	GO:0006518	94	679	0.0136731
Overall	regulation of unidimensional cell growth	Gene Ontology	GO:0051510	13	57	0.0138311
Overall	cytokinesis	Gene Ontology	GO:0000910	18	90	0.0138311
Overall	double-stranded DNA binding	Gene Ontology	GO:0003690	47	304	0.013943
Overall	transition metal ion homeostasis	Gene Ontology	GO:0055076	24	132	0.0139679
Overall	apocarotenoid biosynthetic process	Gene Ontology	GO:0043289	8	27	0.014017
Overall	abscisic acid biosynthetic process	Gene Ontology	GO:0009688	8	27	0.014017
Overall	tertiary alcohol biosynthetic process	Gene Ontology	GO:1902645	8	27	0.014017
Overall	plant organ formation	Gene Ontology	GO:1905393	21	111	0.0141068
Overall	positive regulation of transcription, DNA-templated	Gene Ontology	GO:0045893	69	478	0.0142148
Overall	regulation of cell division	Gene Ontology	GO:0051302	12	51	0.0142382
Overall	extracellular space	Gene Ontology	GO:0005615	27	154	0.0142692
Overall	positive regulation of hydrolase activity	Gene Ontology	GO:0051345	16	77	0.0142861
Overall	posttranscriptional gene silencing	Gene Ontology	GO:0016441	16	77	0.0142861
Overall	mRNA binding	Gene Ontology	GO:0003729	52	344	0.0144921
Overall	actin polymerization or depolymerization	Gene Ontology	GO:0008154	11	45	0.0145042
Overall	xyloglucan:xyloglucosyl transferase activity	Gene Ontology	GO:0016762	9	33	0.0145042
Overall	regulation of protein polymerization	Gene Ontology	GO:0032271	9	33	0.0145042
Overall	ribosome	Gene Ontology	GO:0005840	62	423	0.0145205
Overall	chromosomal region	Gene Ontology	GO:0098687	17	84	0.0145536
Overall	regulation of cell morphogenesis	Gene Ontology	GO:0022604	17	84	0.0145536
Overall	cell wall polysaccharide metabolic process	Gene Ontology	GO:0010383	24	133	0.0147385
Overall	integral component of plasma membrane	Gene Ontology	GO:0005887	28	162	0.0147709
Overall	cellular response to decreased oxygen levels	Gene Ontology	GO:0036294	35	214	0.0147878
Overall	cellular response to oxygen levels	Gene Ontology	GO:0071453	35	214	0.0147878
Overall	photoperiodism	Gene Ontology	GO:0009648	20	105	0.0149689
Overall	positive regulation of nucleic acid-templated transcription	Gene Ontology	GO:1903508	71	496	0.0149689
Overall	positive regulation of RNA biosynthetic process	Gene Ontology	GO:1902680	71	496	0.0149689
Overall	RNA polymerase III activity	Gene Ontology	GO:0001056	7	22	0.0149689
Overall	detection of chemical stimulus	Gene Ontology	GO:0009593	7	22	0.0149689
Overall	nucleoside phosphate metabolic process	Gene Ontology	GO:0006753	39	245	0.0152651
Overall	regulation of stomatal movement	Gene Ontology	GO:0010119	16	78	0.015402
Overall	phosphatidylinositol kinase activity	Gene Ontology	GO:0052742	5	12	0.0155438
Overall	specification of floral organ identity	Gene Ontology	GO:0010093	5	12	0.0155438
Overall	lactate metabolic process	Gene Ontology	GO:0006089	5	12	0.0155438
Overall	terpenoid catabolic process	Gene Ontology	GO:0016115	5	12	0.0155438
Overall	cell plate assembly	Gene Ontology	GO:0000919	5	12	0.0155438
Overall	detection of stimulus	Gene Ontology	GO:0051606	17	85	0.0155438
Overall	late endosome	Gene Ontology	GO:0005770	17	85	0.0155438
Overall	chloroplast RNA processing	Gene Ontology	GO:0031425	6	17	0.0155438
Overall	monosaccharide transmembrane transporter activity	Gene Ontology	GO:0015145	6	17	0.0155438
Overall	isopentenyl diphosphate metabolic process	Gene Ontology	GO:0046490	6	17	0.0155438
Overall	abscisic acid binding	Gene Ontology	GO:0010427	6	17	0.0155438
Overall	catalytic activity, acting on a rRNA	Gene Ontology	GO:0140102	6	17	0.0155438
Overall	isopentenyl diphosphate biosynthetic process	Gene Ontology	GO:0009240	6	17	0.0155438
Overall	regulation of salicylic acid metabolic process	Gene Ontology	GO:0010337	6	17	0.0155438
Overall	carotene metabolic process	Gene Ontology	GO:0016119	6	17	0.0155438
Overall	positive regulation of nucleobase-containing compound metabolic process	Gene Ontology	GO:0045935	75	530	0.0155893
Overall	protein tag	Gene Ontology	GO:0031386	8	28	0.0158261
Overall	coated membrane	Gene Ontology	GO:0048475	11	46	0.0158662
Overall	membrane coat	Gene Ontology	GO:0030117	11	46	0.0158662
Overall	sodium ion transport	Gene Ontology	GO:0006814	11	46	0.0158662
Overall	anchored component of plasma membrane	Gene Ontology	GO:0046658	26	149	0.0158808
Overall	response to cadmium ion	Gene Ontology	GO:0046686	47	308	0.015906
Overall	cellular amino acid metabolic process	Gene Ontology	GO:0006520	53	355	0.01591
Overall	ribose phosphate metabolic process	Gene Ontology	GO:0019693	31	186	0.0159768
Overall	organic hydroxy compound biosynthetic process	Gene Ontology	GO:1901617	31	186	0.0159768
Overall	cellular protein localization	Gene Ontology	GO:0034613	83	596	0.0159856
Overall	seed coat development	Gene Ontology	GO:0010214	10	40	0.0160848
Overall	anatomical structure homeostasis	Gene Ontology	GO:0060249	9	34	0.0160848
Overall	exoribonuclease activity, producing 5'-phosphomonoesters	Gene Ontology	GO:0016896	9	34	0.0160848
Overall	polysaccharide catabolic process	Gene Ontology	GO:0000272	28	164	0.016111
Overall	negative regulation of hydrolase activity	Gene Ontology	GO:0051346	13	59	0.0161744
Overall	potassium ion transmembrane transporter activity	Gene Ontology	GO:0015079	13	59	0.0161744
Overall	ribosomal small subunit biogenesis	Gene Ontology	GO:0042274	13	59	0.0161744
Overall	ribonucleotide metabolic process	Gene Ontology	GO:0009259	30	179	0.0162566
Overall	transition metal ion transport	Gene Ontology	GO:0000041	23	128	0.0164249
Overall	cellular localization	Gene Ontology	GO:0051641	107	795	0.0165313
Overall	flavonoid metabolic process	Gene Ontology	GO:0009812	17	86	0.0165313
Overall	organic acid binding	Gene Ontology	GO:0043177	17	86	0.0165313
Overall	carboxylic acid binding	Gene Ontology	GO:0031406	17	86	0.0165313
Overall	post-embryonic root development	Gene Ontology	GO:0048528	22	121	0.0165313
Overall	plant-type vacuole membrane	Gene Ontology	GO:0009705	21	114	0.0166522
Overall	signal transduction by protein phosphorylation	Gene Ontology	GO:0023014	18	93	0.01666
Overall	plant organ morphogenesis	Gene Ontology	GO:1905392	55	373	0.0170851
Overall	regulation of response to salt stress	Gene Ontology	GO:1901000	7	23	0.0171061
Overall	phytosteroid biosynthetic process	Gene Ontology	GO:0016129	7	23	0.0171061
Overall	nucleobase-containing small molecule metabolic process	Gene Ontology	GO:0055086	49	326	0.0172516
Overall	cytoskeleton	Gene Ontology	GO:0005856	45	295	0.0174253
Overall	thiamine pyrophosphate binding	Gene Ontology	GO:0030976	4	8	0.0174253
Overall	acidic amino acid transmembrane transporter activity	Gene Ontology	GO:0015172	4	8	0.0174253
Overall	nuclear-transcribed mRNA poly(A) tail shortening	Gene Ontology	GO:0000289	4	8	0.0174253
Overall	negative regulation of lipid biosynthetic process	Gene Ontology	GO:0051055	4	8	0.0174253
Overall	plant-type secondary cell wall biogenesis	Gene Ontology	GO:0009834	16	80	0.0175492
Overall	coenzyme binding	Gene Ontology	GO:0050662	54	366	0.0175494
Overall	structural constituent of ribosome	Gene Ontology	GO:0003735	39	249	0.017653
Overall	response to nutrient levels	Gene Ontology	GO:0031667	34	211	0.0176852
Overall	acid phosphatase activity	Gene Ontology	GO:0003993	10	41	0.0176852
Overall	negative regulation of growth	Gene Ontology	GO:0045926	8	29	0.0176852
Overall	telomere maintenance	Gene Ontology	GO:0000723	8	29	0.0176852
Overall	anthocyanin-containing compound biosynthetic process	Gene Ontology	GO:0009718	8	29	0.0176852
Overall	3'-5'-exoribonuclease activity	Gene Ontology	GO:0000175	8	29	0.0176852
Overall	positive regulation of protein serine/threonine kinase activity	Gene Ontology	GO:0071902	8	29	0.0176852
Overall	CoA-ligase activity	Gene Ontology	GO:0016405	8	29	0.0176852
Overall	telomere organization	Gene Ontology	GO:0032200	8	29	0.0176852
Overall	exoribonuclease activity	Gene Ontology	GO:0004532	9	35	0.0178536
Overall	vesicle coat	Gene Ontology	GO:0030120	9	35	0.0178536
Overall	gene silencing	Gene Ontology	GO:0016458	27	159	0.017926
Overall	phloem transport	Gene Ontology	GO:0010233	6	18	0.017926
Overall	chitin catabolic process	Gene Ontology	GO:0006032	6	18	0.017926
Overall	glucosamine-containing compound catabolic process	Gene Ontology	GO:1901072	6	18	0.017926
Overall	snoRNA binding	Gene Ontology	GO:0030515	6	18	0.017926
Overall	amino sugar catabolic process	Gene Ontology	GO:0046348	6	18	0.017926
Overall	aminoglycan catabolic process	Gene Ontology	GO:0006026	6	18	0.017926
Overall	neutral amino acid transport	Gene Ontology	GO:0015804	6	18	0.017926
Overall	mucilage metabolic process involved in seed coat development	Gene Ontology	GO:0048359	6	18	0.017926
Overall	vascular transport	Gene Ontology	GO:0010232	6	18	0.017926
Overall	chitin metabolic process	Gene Ontology	GO:0006030	6	18	0.017926
Overall	regulation of alcohol biosynthetic process	Gene Ontology	GO:1902930	6	18	0.017926
Overall	calcium ion transmembrane transport	Gene Ontology	GO:0070588	12	54	0.0181303
Overall	cellular response to hypoxia	Gene Ontology	GO:0071456	34	212	0.0183205
Overall	ribosomal large subunit biogenesis	Gene Ontology	GO:0042273	15	74	0.0183304
Overall	ubiquinone biosynthetic process	Gene Ontology	GO:0006744	5	13	0.0183391
Overall	positive regulation of histone methylation	Gene Ontology	GO:0031062	5	13	0.0183391
Overall	production of ta-siRNAs involved in RNA interference	Gene Ontology	GO:0010267	5	13	0.0183391
Overall	ubiquinone metabolic process	Gene Ontology	GO:0006743	5	13	0.0183391
Overall	specification of plant organ identity	Gene Ontology	GO:0090701	5	13	0.0183391
Overall	glucosinolate metabolic process	Gene Ontology	GO:0019760	21	116	0.0184071
Overall	S-glycoside metabolic process	Gene Ontology	GO:0016143	21	116	0.0184071
Overall	glycosinolate metabolic process	Gene Ontology	GO:0019757	21	116	0.0184071
Overall	response to hexose	Gene Ontology	GO:0009746	13	61	0.0188076
Overall	cysteine-type endopeptidase activity	Gene Ontology	GO:0004197	13	61	0.0188076
Overall	potassium ion transmembrane transport	Gene Ontology	GO:0071805	13	61	0.0188076
Overall	regulation of photosynthesis, light reaction	Gene Ontology	GO:0042548	7	24	0.0193166
Overall	cell wall macromolecule catabolic process	Gene Ontology	GO:0016998	7	24	0.0193166
Overall	oxidoreduction coenzyme metabolic process	Gene Ontology	GO:0006733	7	24	0.0193166
Overall	specification of axis polarity	Gene Ontology	GO:0065001	7	24	0.0193166
Overall	aerobic respiration	Gene Ontology	GO:0009060	14	68	0.01934
Overall	spindle	Gene Ontology	GO:0005819	14	68	0.01934
Overall	protein export from nucleus	Gene Ontology	GO:0006611	10	42	0.0193675
Overall	actin filament organization	Gene Ontology	GO:0007015	15	75	0.0196894
Overall	aromatic compound catabolic process	Gene Ontology	GO:0019439	31	191	0.0196894
Overall	antiporter activity	Gene Ontology	GO:0015297	29	176	0.0196894
Overall	response to glucose	Gene Ontology	GO:0009749	12	55	0.0196894
Overall	negative regulation of phosphorus metabolic process	Gene Ontology	GO:0010563	12	55	0.0196894
Overall	negative regulation of phosphate metabolic process	Gene Ontology	GO:0045936	12	55	0.0196894
Overall	ferroxidase activity	Gene Ontology	GO:0004322	9	36	0.0196894
Overall	oxidoreductase activity, oxidizing metal ions, oxygen as acceptor	Gene Ontology	GO:0016724	9	36	0.0196894
Overall	regulation of actin filament polymerization	Gene Ontology	GO:0030833	8	30	0.0197222
Overall	small GTPase mediated signal transduction	Gene Ontology	GO:0007264	16	82	0.0198196
Overall	cell division	Gene Ontology	GO:0051301	51	347	0.0201708
Overall	macromolecule methylation	Gene Ontology	GO:0043414	31	192	0.0206439
Overall	carboxypeptidase activity	Gene Ontology	GO:0004180	11	49	0.020655
Overall	helicase activity	Gene Ontology	GO:0004386	24	140	0.0209006
Overall	posttranscriptional gene silencing by RNA	Gene Ontology	GO:0035194	14	69	0.0209006
Overall	peptidyl-amino acid modification	Gene Ontology	GO:0018193	57	396	0.0209006
Overall	histone H3-K4 methylation	Gene Ontology	GO:0051568	6	19	0.0209006
Overall	regulation of brassinosteroid mediated signaling pathway	Gene Ontology	GO:1900457	6	19	0.0209006
Overall	NADH dehydrogenase activity	Gene Ontology	GO:0003954	6	19	0.0209006
Overall	monosaccharide transmembrane transport	Gene Ontology	GO:0015749	6	19	0.0209006
Overall	lateral root development	Gene Ontology	GO:0048527	20	111	0.02091
Overall	organic cyclic compound catabolic process	Gene Ontology	GO:1901361	32	200	0.02091
Overall	phospholipid metabolic process	Gene Ontology	GO:0006644	30	185	0.0210793
Overall	membrane organization	Gene Ontology	GO:0061024	33	208	0.0212874
Overall	oxidoreductase activity, oxidizing metal ions	Gene Ontology	GO:0016722	10	43	0.0213481
Overall	serine-type exopeptidase activity	Gene Ontology	GO:0070008	10	43	0.0213481
Overall	cellular macromolecule localization	Gene Ontology	GO:0070727	85	625	0.0214175
Overall	positive regulation of cellular protein localization	Gene Ontology	GO:1903829	4	9	0.0214471
Overall	steroid dehydrogenase activity	Gene Ontology	GO:0016229	4	9	0.0214471
Overall	negative regulation of response to salt stress	Gene Ontology	GO:1901001	4	9	0.0214471
Overall	positive regulation of protein transport	Gene Ontology	GO:0051222	4	9	0.0214471
Overall	negative regulation of lipid metabolic process	Gene Ontology	GO:0045833	4	9	0.0214471
Overall	autophagosome membrane	Gene Ontology	GO:0000421	4	9	0.0214471
Overall	protein prenylation	Gene Ontology	GO:0018342	4	9	0.0214471
Overall	prenylation	Gene Ontology	GO:0097354	4	9	0.0214471
Overall	positive regulation of establishment of protein localization	Gene Ontology	GO:1904951	4	9	0.0214471
Overall	positive regulation of intracellular protein transport	Gene Ontology	GO:0090316	4	9	0.0214471
Overall	3'-5' DNA helicase activity	Gene Ontology	GO:0043138	4	9	0.0214471
Overall	16:0 monogalactosyldiacylglycerol desaturase activity	Gene Ontology	GO:0009979	4	9	0.0214471
Overall	decanoate-CoA ligase activity	Gene Ontology	GO:0102391	4	9	0.0214471
Overall	regulation of gibberellin biosynthetic process	Gene Ontology	GO:0010371	4	9	0.0214471
Overall	organelle subcompartment	Gene Ontology	GO:0031984	103	775	0.021487
Overall	lipid transporter activity	Gene Ontology	GO:0005319	9	37	0.0217265
Overall	regulation of defense response to fungus	Gene Ontology	GO:1900150	7	25	0.0217265
Overall	oxidoreductase activity, acting on NAD(P)H, quinone or similar compound as acceptor	Gene Ontology	GO:0016655	7	25	0.0217265
Overall	RNA polymerase I complex	Gene Ontology	GO:0005736	5	14	0.0217265
Overall	preribosome, large subunit precursor	Gene Ontology	GO:0030687	5	14	0.0217265
Overall	systemic acquired resistance, salicylic acid mediated signaling pathway	Gene Ontology	GO:0009862	5	14	0.0217265
Overall	thylakoid	Gene Ontology	GO:0009579	68	487	0.0218734
Overall	gene silencing by RNA	Gene Ontology	GO:0031047	20	112	0.0218734
Overall	stromule	Gene Ontology	GO:0010319	8	31	0.0218734
Overall	actin filament polymerization	Gene Ontology	GO:0030041	8	31	0.0218734
Overall	regulation of histone modification	Gene Ontology	GO:0031056	8	31	0.0218734
Overall	response to insect	Gene Ontology	GO:0009625	8	31	0.0218734
Overall	regulation of anatomical structure morphogenesis	Gene Ontology	GO:0022603	25	149	0.0223426
Overall	gravitropism	Gene Ontology	GO:0009630	15	77	0.0223817
Overall	4 iron, 4 sulfur cluster binding	Gene Ontology	GO:0051539	15	77	0.0223817
Overall	cellular protein-containing complex assembly	Gene Ontology	GO:0034622	56	391	0.0226171
Overall	meristem development	Gene Ontology	GO:0048507	36	233	0.022724
Overall	purine-containing compound metabolic process	Gene Ontology	GO:0072521	30	187	0.0227573
Overall	regulation of multicellular organismal process	Gene Ontology	GO:0051239	71	513	0.022804
Overall	3'-5' exonuclease activity	Gene Ontology	GO:0008408	12	57	0.0230562
Overall	exonuclease activity, active with either ribo- or deoxyribonucleic acids and producing 5'-phosphomonoesters	Gene Ontology	GO:0016796	10	44	0.0232258
Overall	DNA-dependent DNA replication	Gene Ontology	GO:0006261	20	113	0.0232258
Overall	anion transmembrane transport	Gene Ontology	GO:0098656	46	312	0.0232295
Overall	regulation of multicellular organismal development	Gene Ontology	GO:2000026	65	465	0.0234196
Overall	protein folding	Gene Ontology	GO:0006457	25	150	0.0234249
Overall	meristem structural organization	Gene Ontology	GO:0009933	13	64	0.0234249
Overall	negative regulation of DNA-binding transcription factor activity	Gene Ontology	GO:0043433	3	5	0.0234249
Overall	negative regulation of isoprenoid metabolic process	Gene Ontology	GO:0045827	3	5	0.0234249
Overall	NAD(P)H dehydrogenase (quinone) activity	Gene Ontology	GO:0003955	3	5	0.0234249
Overall	regulation of olefin biosynthetic process	Gene Ontology	GO:1900911	3	5	0.0234249
Overall	regulation of ethylene biosynthetic process	Gene Ontology	GO:0010364	3	5	0.0234249
Overall	L-glutamate transmembrane transporter activity	Gene Ontology	GO:0005313	3	5	0.0234249
Overall	regulation of olefin metabolic process	Gene Ontology	GO:1900908	3	5	0.0234249
Overall	cellular cadmium ion homeostasis	Gene Ontology	GO:0006876	3	5	0.0234249
Overall	class I DNA-(apurinic or apyrimidinic site) endonuclease activity	Gene Ontology	GO:0140078	3	5	0.0234249
Overall	regulation of sulfur amino acid metabolic process	Gene Ontology	GO:0031335	3	5	0.0234249
Overall	mitochondrial RNA 3'-end processing	Gene Ontology	GO:0000965	3	5	0.0234249
Overall	error-prone translesion synthesis	Gene Ontology	GO:0042276	3	5	0.0234249
Overall	Notch signaling pathway	Gene Ontology	GO:0007219	3	5	0.0234249
Overall	reactive oxygen species biosynthetic process	Gene Ontology	GO:1903409	6	20	0.0236322
Overall	positive regulation of chromatin organization	Gene Ontology	GO:1905269	6	20	0.0236322
Overall	positive regulation of small molecule metabolic process	Gene Ontology	GO:0062013	6	20	0.0236322
Overall	glucosamine-containing compound metabolic process	Gene Ontology	GO:1901071	6	20	0.0236322
Overall	multidimensional cell growth	Gene Ontology	GO:0009825	9	38	0.0237375
Overall	anion transport	Gene Ontology	GO:0006820	54	377	0.0238029
Overall	glucan metabolic process	Gene Ontology	GO:0044042	32	204	0.0242527
Overall	cellular glucan metabolic process	Gene Ontology	GO:0006073	32	204	0.0242527
Overall	transcription by RNA polymerase III	Gene Ontology	GO:0006383	8	32	0.02431
Overall	response to metal ion	Gene Ontology	GO:0010038	58	410	0.0243653
Overall	NADP binding	Gene Ontology	GO:0050661	12	58	0.0247658
Overall	DNA packaging complex	Gene Ontology	GO:0044815	12	58	0.0247658
Overall	calcium ion binding	Gene Ontology	GO:0005509	34	220	0.02484
Overall	response to monosaccharide	Gene Ontology	GO:0034284	13	65	0.0252254
Overall	nucleoside diphosphate phosphorylation	Gene Ontology	GO:0006165	13	65	0.0252254
Overall	regulation of reactive oxygen species metabolic process	Gene Ontology	GO:2000377	10	45	0.0252254
Overall	plant ovule development	Gene Ontology	GO:0048481	10	45	0.0252254
Overall	acetyltransferase activity	Gene Ontology	GO:0016407	21	122	0.0252754
Overall	autophagosome	Gene Ontology	GO:0005776	5	15	0.0255077
Overall	vernalization response	Gene Ontology	GO:0010048	5	15	0.0255077
Overall	neutral amino acid transmembrane transporter activity	Gene Ontology	GO:0015175	5	15	0.0255077
Overall	response to carbohydrate	Gene Ontology	GO:0009743	23	137	0.0255187
Overall	pigment biosynthetic process	Gene Ontology	GO:0046148	23	137	0.0255187
Overall	purine ribonucleoside binding	Gene Ontology	GO:0032550	34	221	0.0258047
Overall	purine nucleoside binding	Gene Ontology	GO:0001883	34	221	0.0258047
Overall	chromosome organization	Gene Ontology	GO:0051276	69	502	0.0259879
Overall	medium-chain fatty acid-CoA ligase activity	Gene Ontology	GO:0031956	4	10	0.0260356
Overall	positive regulation of cofactor metabolic process	Gene Ontology	GO:0051194	4	10	0.0260356
Overall	activation of GTPase activity	Gene Ontology	GO:0090630	4	10	0.0260356
Overall	protein-DNA loading ATPase activity	Gene Ontology	GO:0033170	4	10	0.0260356
Overall	positive regulation of intracellular transport	Gene Ontology	GO:0032388	4	10	0.0260356
Overall	protein-disulfide reductase activity	Gene Ontology	GO:0047134	4	10	0.0260356
Overall	long-chain fatty acid-CoA ligase activity	Gene Ontology	GO:0004467	4	10	0.0260356
Overall	acyl-CoA ligase activity	Gene Ontology	GO:0003996	4	10	0.0260356
Overall	DNA clamp loader activity	Gene Ontology	GO:0003689	4	10	0.0260356
Overall	ncRNA transcription	Gene Ontology	GO:0098781	4	10	0.0260356
Overall	RNA phosphodiester bond hydrolysis, exonucleolytic	Gene Ontology	GO:0090503	9	39	0.0260701
Overall	structural molecule activity	Gene Ontology	GO:0005198	49	340	0.0260701
Overall	response to chitin	Gene Ontology	GO:0010200	21	123	0.0264997
Overall	regulation of cytoskeleton organization	Gene Ontology	GO:0051493	12	59	0.0266304
Overall	DNA replication	Gene Ontology	GO:0006260	23	138	0.0267151
Overall	anchored component of membrane	Gene Ontology	GO:0031225	41	277	0.0267493
Overall	plastid organization	Gene Ontology	GO:0009657	35	230	0.0268851
Overall	fucose metabolic process	Gene Ontology	GO:0006004	8	33	0.0268851
Overall	O-methyltransferase activity	Gene Ontology	GO:0008171	8	33	0.0268851
Overall	benzene-containing compound metabolic process	Gene Ontology	GO:0042537	13	66	0.0268851
Overall	isoprenoid binding	Gene Ontology	GO:0019840	6	21	0.0268851
Overall	methyltransferase complex	Gene Ontology	GO:0034708	6	21	0.0268851
Overall	rRNA methylation	Gene Ontology	GO:0031167	6	21	0.0268851
Overall	positive regulation of supramolecular fiber organization	Gene Ontology	GO:1902905	6	21	0.0268851
Overall	positive regulation of cytoskeleton organization	Gene Ontology	GO:0051495	6	21	0.0268851
Overall	cellulose metabolic process	Gene Ontology	GO:0030243	15	80	0.0268871
Overall	cell cortex	Gene Ontology	GO:0005938	15	80	0.0268871
Overall	anatomical structure arrangement	Gene Ontology	GO:0048532	14	73	0.0268946
Overall	negative regulation of cellular protein metabolic process	Gene Ontology	GO:0032269	22	131	0.027087
Overall	amino sugar metabolic process	Gene Ontology	GO:0006040	7	27	0.027087
Overall	rRNA modification	Gene Ontology	GO:0000154	7	27	0.027087
Overall	fatty acid derivative biosynthetic process	Gene Ontology	GO:1901570	7	27	0.027087
Overall	protein polymerization	Gene Ontology	GO:0051258	10	46	0.027087
Overall	defense response to virus	Gene Ontology	GO:0051607	10	46	0.027087
Overall	protein processing	Gene Ontology	GO:0016485	10	46	0.027087
Overall	nuclear export	Gene Ontology	GO:0051168	10	46	0.027087
Overall	ion transmembrane transporter activity, phosphorylative mechanism	Gene Ontology	GO:0015662	10	46	0.027087
Overall	protein heterodimerization activity	Gene Ontology	GO:0046982	21	124	0.0276421
Overall	peroxidase activity	Gene Ontology	GO:0004601	21	124	0.0276421
Overall	gametophyte development	Gene Ontology	GO:0048229	54	383	0.0280955
Overall	response to cytokinin	Gene Ontology	GO:0009735	17	95	0.0280955
Overall	photomorphogenesis	Gene Ontology	GO:0009640	16	88	0.0284615
Overall	xylem development	Gene Ontology	GO:0010089	9	40	0.0284626
Overall	megagametogenesis	Gene Ontology	GO:0009561	12	60	0.0284626
Overall	stomatal complex development	Gene Ontology	GO:0010374	12	60	0.0284626
Overall	nucleoside binding	Gene Ontology	GO:0001882	34	224	0.0285157
Overall	ribonucleoside binding	Gene Ontology	GO:0032549	34	224	0.0285157
Overall	nucleoside diphosphate metabolic process	Gene Ontology	GO:0009132	13	67	0.0286747
Overall	phosphoric ester hydrolase activity	Gene Ontology	GO:0042578	53	376	0.0289795
Overall	plant-type cell wall organization	Gene Ontology	GO:0009664	21	125	0.0291357
Overall	cellular carbohydrate metabolic process	Gene Ontology	GO:0044262	58	417	0.0292665
Overall	sequence-specific DNA binding	Gene Ontology	GO:0043565	95	724	0.0293455
Overall	posttranscriptional regulation of gene expression	Gene Ontology	GO:0010608	46	320	0.0293542
Overall	response to salt	Gene Ontology	GO:1902074	5	16	0.0293542
Overall	zinc ion homeostasis	Gene Ontology	GO:0055069	5	16	0.0293542
Overall	histone H3-K9 modification	Gene Ontology	GO:0061647	5	16	0.0293542
Overall	detoxification	Gene Ontology	GO:0098754	33	217	0.029376
Overall	glycolipid biosynthetic process	Gene Ontology	GO:0009247	8	34	0.0295008
Overall	adaxial/abaxial pattern specification	Gene Ontology	GO:0009955	8	34	0.0295008
Overall	plant-type ovary development	Gene Ontology	GO:0035670	10	47	0.0295046
Overall	supramolecular fiber organization	Gene Ontology	GO:0097435	20	118	0.0296682
Overall	microtubule cytoskeleton	Gene Ontology	GO:0015630	31	202	0.0298437
Overall	aromatic amino acid family biosynthetic process	Gene Ontology	GO:0009073	11	54	0.0298437
Overall	autophagy	Gene Ontology	GO:0006914	11	54	0.0298437
Overall	process utilizing autophagic mechanism	Gene Ontology	GO:0061919	11	54	0.0298437
Overall	monocarboxylic acid catabolic process	Gene Ontology	GO:0072329	11	54	0.0298437
Overall	ion channel complex	Gene Ontology	GO:0034702	3	6	0.0298437
Overall	regulation of endocytosis	Gene Ontology	GO:0030100	3	6	0.0298437
Overall	positive regulation of abscisic acid biosynthetic process	Gene Ontology	GO:0010116	3	6	0.0298437
Overall	regulation of mitochondrion organization	Gene Ontology	GO:0010821	3	6	0.0298437
Overall	phloem loading	Gene Ontology	GO:0110126	3	6	0.0298437
Overall	chloride channel complex	Gene Ontology	GO:0034707	3	6	0.0298437
Overall	tubulin complex assembly	Gene Ontology	GO:0007021	3	6	0.0298437
Overall	voltage-gated chloride channel activity	Gene Ontology	GO:0005247	3	6	0.0298437
Overall	detection of hormone stimulus	Gene Ontology	GO:0009720	3	6	0.0298437
Overall	detection of endogenous stimulus	Gene Ontology	GO:0009726	3	6	0.0298437
Overall	regulation of histone H3-K9 methylation	Gene Ontology	GO:0051570	3	6	0.0298437
Overall	L-glutamate transmembrane transport	Gene Ontology	GO:0015813	3	6	0.0298437
Overall	rhamnogalacturonan I metabolic process	Gene Ontology	GO:0010395	3	6	0.0298437
Overall	leaf formation	Gene Ontology	GO:0010338	3	6	0.0298437
Overall	regulation of nucleocytoplasmic transport	Gene Ontology	GO:0046822	3	6	0.0298437
Overall	multivesicular body membrane	Gene Ontology	GO:0032585	3	6	0.0298437
Overall	mismatch repair complex	Gene Ontology	GO:0032300	3	6	0.0298437
Overall	alcohol transmembrane transporter activity	Gene Ontology	GO:0015665	3	6	0.0298437
Overall	auxin-activated signaling pathway	Gene Ontology	GO:0009734	28	179	0.0298734
Overall	actin cytoskeleton organization	Gene Ontology	GO:0030036	15	82	0.0298768
Overall	protein-DNA complex	Gene Ontology	GO:0032993	15	82	0.0298768
Overall	FMN binding	Gene Ontology	GO:0010181	6	22	0.0298768
Overall	regulation of histone methylation	Gene Ontology	GO:0031060	6	22	0.0298768
Overall	response to freezing	Gene Ontology	GO:0050826	6	22	0.0298768
Overall	chromosome, telomeric region	Gene Ontology	GO:0000781	6	22	0.0298768
Overall	glycolytic process	Gene Ontology	GO:0006096	12	61	0.0300011
Overall	ATP generation from ADP	Gene Ontology	GO:0006757	12	61	0.0300011
Overall	ADP metabolic process	Gene Ontology	GO:0046031	12	61	0.0300011
Overall	systemic acquired resistance	Gene Ontology	GO:0009627	14	75	0.0300259
Overall	positive regulation of immune system process	Gene Ontology	GO:0002684	13	68	0.0300259
Overall	positive regulation of immune response	Gene Ontology	GO:0050778	13	68	0.0300259
Overall	positive regulation of innate immune response	Gene Ontology	GO:0045089	13	68	0.0300259
Overall	nucleotide phosphorylation	Gene Ontology	GO:0046939	13	68	0.0300259
Overall	RNA methyltransferase activity	Gene Ontology	GO:0008173	9	41	0.030181
Overall	axis specification	Gene Ontology	GO:0009798	9	41	0.030181
Overall	peptidyl-lysine modification	Gene Ontology	GO:0018205	24	149	0.030181
Overall	mitotic G2/M transition checkpoint	Gene Ontology	GO:0044818	4	11	0.030181
Overall	ubiquitin-like modifier activating enzyme activity	Gene Ontology	GO:0008641	4	11	0.030181
Overall	riboflavin biosynthetic process	Gene Ontology	GO:0009231	4	11	0.030181
Overall	fatty acid ligase activity	Gene Ontology	GO:0015645	4	11	0.030181
Overall	vesicle-mediated transport to the plasma membrane	Gene Ontology	GO:0098876	4	11	0.030181
Overall	negative regulation of G2/M transition of mitotic cell cycle	Gene Ontology	GO:0010972	4	11	0.030181
Overall	negative regulation of cell cycle G2/M phase transition	Gene Ontology	GO:1902750	4	11	0.030181
Overall	inorganic diphosphatase activity	Gene Ontology	GO:0004427	4	11	0.030181
Overall	negative regulation of cellular catabolic process	Gene Ontology	GO:0031330	4	11	0.030181
Overall	regulation of DNA-binding transcription factor activity	Gene Ontology	GO:0051090	4	11	0.030181
Overall	positive regulation of cell division	Gene Ontology	GO:0051781	4	11	0.030181
Overall	riboflavin metabolic process	Gene Ontology	GO:0006771	4	11	0.030181
Overall	chaperonin-containing T-complex	Gene Ontology	GO:0005832	4	11	0.030181
Overall	cellular zinc ion homeostasis	Gene Ontology	GO:0006882	4	11	0.030181
Overall	small ribosomal subunit	Gene Ontology	GO:0015935	20	119	0.030252
Overall	DNA recombination	Gene Ontology	GO:0006310	22	134	0.0302846
Overall	positive regulation of response to stimulus	Gene Ontology	GO:0048584	34	227	0.0308576
Overall	drug catabolic process	Gene Ontology	GO:0042737	34	227	0.0308576
Overall	negative regulation of molecular function	Gene Ontology	GO:0044092	35	235	0.0309825
Overall	regulation of gene expression, epigenetic	Gene Ontology	GO:0040029	23	142	0.0309825
Overall	protein serine/threonine/tyrosine kinase activity	Gene Ontology	GO:0004712	10	48	0.0310842
Overall	ubiquitin-like protein-specific protease activity	Gene Ontology	GO:0019783	10	48	0.0310842
Overall	cellular response to auxin stimulus	Gene Ontology	GO:0071365	30	196	0.0311985
Overall	ribosomal subunit	Gene Ontology	GO:0044391	40	275	0.0312795
Overall	negative regulation of multi-organism process	Gene Ontology	GO:0043901	8	35	0.0314556
Overall	negative regulation of response to external stimulus	Gene Ontology	GO:0032102	8	35	0.0314556
Overall	sugar mediated signaling pathway	Gene Ontology	GO:0010182	8	35	0.0314556
Overall	negative regulation of response to biotic stimulus	Gene Ontology	GO:0002832	8	35	0.0314556
Overall	carbohydrate mediated signaling	Gene Ontology	GO:0009756	8	35	0.0314556
Overall	tropism	Gene Ontology	GO:0009606	18	105	0.0314556
Overall	positive regulation of GTPase activity	Gene Ontology	GO:0043547	11	55	0.0314556
Overall	nucleosome	Gene Ontology	GO:0000786	11	55	0.0314556
Overall	regulation of protein catabolic process	Gene Ontology	GO:0042176	11	55	0.0314556
Overall	GTPase activator activity	Gene Ontology	GO:0005096	11	55	0.0314556
Overall	aromatic amino acid family metabolic process	Gene Ontology	GO:0009072	14	76	0.0314697
Overall	electron transfer activity	Gene Ontology	GO:0009055	22	135	0.0316282
Overall	cellular response to phosphate starvation	Gene Ontology	GO:0016036	13	69	0.0316422
Overall	negative regulation of gene expression	Gene Ontology	GO:0010629	61	447	0.0325086
Overall	response to ozone	Gene Ontology	GO:0010193	7	29	0.0325548
Overall	sulfur compound transmembrane transporter activity	Gene Ontology	GO:1901682	7	29	0.0325548
Overall	mitotic cell cycle	Gene Ontology	GO:0000278	32	213	0.0325548
Overall	plant-type cell wall cellulose metabolic process	Gene Ontology	GO:0052541	5	17	0.0325548
Overall	DNA unwinding involved in DNA replication	Gene Ontology	GO:0006268	5	17	0.0325548
Overall	L-amino acid transport	Gene Ontology	GO:0015807	5	17	0.0325548
Overall	cell wall beta-glucan metabolic process	Gene Ontology	GO:0034406	5	17	0.0325548
Overall	L-amino acid transmembrane transporter activity	Gene Ontology	GO:0015179	5	17	0.0325548
Overall	RNA polymerase I activity	Gene Ontology	GO:0001054	5	17	0.0325548
Overall	chitinase activity	Gene Ontology	GO:0004568	5	17	0.0325548
Overall	L-alpha-amino acid transmembrane transport	Gene Ontology	GO:1902475	5	17	0.0325548
Overall	guanyl-nucleotide exchange factor activity	Gene Ontology	GO:0005085	9	42	0.0325548
Overall	serine-type carboxypeptidase activity	Gene Ontology	GO:0004185	9	42	0.0325548
Overall	monovalent cation:proton antiporter activity	Gene Ontology	GO:0005451	9	42	0.0325548
Overall	negative regulation of immune system process	Gene Ontology	GO:0002683	6	23	0.0329622
Overall	aminoglycan metabolic process	Gene Ontology	GO:0006022	6	23	0.0329622
Overall	molecular carrier activity	Gene Ontology	GO:0140104	6	23	0.0329622
Overall	regulation of transferase activity	Gene Ontology	GO:0051338	26	167	0.0336091
Overall	regulation of localization	Gene Ontology	GO:0032879	31	206	0.0336394
Overall	cellular response to antibiotic	Gene Ontology	GO:0071236	13	70	0.0337261
Overall	purine ribonucleoside diphosphate metabolic process	Gene Ontology	GO:0009179	12	63	0.0338096
Overall	ribonucleoside diphosphate metabolic process	Gene Ontology	GO:0009185	12	63	0.0338096
Overall	purine nucleoside diphosphate metabolic process	Gene Ontology	GO:0009135	12	63	0.0338096
Overall	endosome	Gene Ontology	GO:0005768	52	375	0.0338495
Overall	energy derivation by oxidation of organic compounds	Gene Ontology	GO:0015980	19	114	0.0339512
Overall	liposaccharide metabolic process	Gene Ontology	GO:1903509	8	36	0.0343159
Overall	glycolipid metabolic process	Gene Ontology	GO:0006664	8	36	0.0343159
Overall	metal cluster binding	Gene Ontology	GO:0051540	22	137	0.0345213
Overall	iron-sulfur cluster binding	Gene Ontology	GO:0051536	22	137	0.0345213
Overall	purine ribonucleotide metabolic process	Gene Ontology	GO:0009150	25	160	0.0345213
Overall	ATP metabolic process	Gene Ontology	GO:0046034	18	107	0.0347706
Overall	beta-glucan metabolic process	Gene Ontology	GO:0051273	15	85	0.0349541
Overall	exonuclease activity	Gene Ontology	GO:0004527	15	85	0.0349541
Overall	solute:proton antiporter activity	Gene Ontology	GO:0015299	9	43	0.0352783
Overall	oxidoreductase activity, acting on peroxide as acceptor	Gene Ontology	GO:0016684	21	130	0.0352783
Overall	NADH dehydrogenase (quinone) activity	Gene Ontology	GO:0050136	4	12	0.0352783
Overall	DNA repair complex	Gene Ontology	GO:1990391	4	12	0.0352783
Overall	regulation of actin filament depolymerization	Gene Ontology	GO:0030834	4	12	0.0352783
Overall	regulation of embryonic development	Gene Ontology	GO:0045995	4	12	0.0352783
Overall	NADH dehydrogenase (ubiquinone) activity	Gene Ontology	GO:0008137	4	12	0.0352783
Overall	regulation of DNA methylation	Gene Ontology	GO:0044030	4	12	0.0352783
Overall	negative regulation of small molecule metabolic process	Gene Ontology	GO:0062014	4	12	0.0352783
Overall	omega-3 fatty acid desaturase activity	Gene Ontology	GO:0042389	4	12	0.0352783
Overall	flavin-containing compound biosynthetic process	Gene Ontology	GO:0042727	4	12	0.0352783
Overall	regulation of autophagy	Gene Ontology	GO:0010506	4	12	0.0352783
Overall	isocitrate metabolic process	Gene Ontology	GO:0006102	4	12	0.0352783
Overall	response to karrikin	Gene Ontology	GO:0080167	19	115	0.0354682
Overall	carotenoid biosynthetic process	Gene Ontology	GO:0016117	7	30	0.0355771
Overall	tetraterpenoid biosynthetic process	Gene Ontology	GO:0016109	7	30	0.0355771
Overall	auxin homeostasis	Gene Ontology	GO:0010252	7	30	0.0355771
Overall	cell plate	Gene Ontology	GO:0009504	7	30	0.0355771
Overall	cellular transition metal ion homeostasis	Gene Ontology	GO:0046916	13	71	0.035598
Overall	regulation of cell cycle	Gene Ontology	GO:0051726	30	200	0.0356475
Overall	DNA methylation	Gene Ontology	GO:0006306	10	50	0.0356985
Overall	DNA alkylation	Gene Ontology	GO:0006305	10	50	0.0356985
Overall	membrane lipid biosynthetic process	Gene Ontology	GO:0046467	12	64	0.035756
Overall	translational elongation	Gene Ontology	GO:0006414	12	64	0.035756
Overall	mitotic cell cycle phase transition	Gene Ontology	GO:0044772	12	64	0.035756
Overall	DNA methylation or demethylation	Gene Ontology	GO:0044728	12	64	0.035756
Overall	regulation of phosphorylation	Gene Ontology	GO:0042325	26	169	0.0359109
Overall	sulfur compound metabolic process	Gene Ontology	GO:0006790	48	345	0.0359109
Overall	transmembrane transporter complex	Gene Ontology	GO:1902495	3	7	0.0359109
Overall	mismatched DNA binding	Gene Ontology	GO:0030983	3	7	0.0359109
Overall	protein geranylgeranylation	Gene Ontology	GO:0018344	3	7	0.0359109
Overall	protein prenyltransferase activity	Gene Ontology	GO:0008318	3	7	0.0359109
Overall	3-hydroxyisobutyryl-CoA hydrolase activity	Gene Ontology	GO:0003860	3	7	0.0359109
Overall	DNA replication factor C complex	Gene Ontology	GO:0005663	3	7	0.0359109
Overall	condensed nuclear chromosome, centromeric region	Gene Ontology	GO:0000780	3	7	0.0359109
Overall	ATPase activator activity	Gene Ontology	GO:0001671	3	7	0.0359109
Overall	core mediator complex	Gene Ontology	GO:0070847	3	7	0.0359109
Overall	positive regulation of cell wall organization or biogenesis	Gene Ontology	GO:1903340	3	7	0.0359109
Overall	chloride channel activity	Gene Ontology	GO:0005254	3	7	0.0359109
Overall	abscisic acid glucosyltransferase activity	Gene Ontology	GO:0010294	3	7	0.0359109
Overall	positive regulation of secondary cell wall biogenesis	Gene Ontology	GO:1901348	3	7	0.0359109
Overall	anion channel activity	Gene Ontology	GO:0005253	6	24	0.0362836
Overall	G2/M transition of mitotic cell cycle	Gene Ontology	GO:0000086	6	24	0.0362836
Overall	phosphatidylinositol biosynthetic process	Gene Ontology	GO:0006661	6	24	0.0362836
Overall	galactosidase activity	Gene Ontology	GO:0015925	5	18	0.0363447
Overall	secondary alcohol metabolic process	Gene Ontology	GO:1902652	5	18	0.0363447
Overall	defense response signaling pathway, resistance gene-independent	Gene Ontology	GO:0010204	5	18	0.0363447
Overall	poly(A)-specific ribonuclease activity	Gene Ontology	GO:0004535	5	18	0.0363447
Overall	calcium channel activity	Gene Ontology	GO:0005262	5	18	0.0363447
Overall	nucleocytoplasmic carrier activity	Gene Ontology	GO:0140142	5	18	0.0363447
Overall	condensed chromosome, centromeric region	Gene Ontology	GO:0000779	5	18	0.0363447
Overall	perinuclear region of cytoplasm	Gene Ontology	GO:0048471	5	18	0.0363447
Overall	tetraterpenoid metabolic process	Gene Ontology	GO:0016108	8	37	0.0366368
Overall	carotenoid metabolic process	Gene Ontology	GO:0016116	8	37	0.0366368
Overall	peptide:proton symporter activity	Gene Ontology	GO:0015333	8	37	0.0366368
Overall	cellular respiration	Gene Ontology	GO:0045333	16	94	0.03755
Overall	regulation of carbohydrate metabolic process	Gene Ontology	GO:0006109	12	65	0.0378548
Overall	DNA modification	Gene Ontology	GO:0006304	12	65	0.0378548
Overall	cytoskeleton-dependent cytokinesis	Gene Ontology	GO:0061640	10	51	0.0379577
Overall	tricarboxylic acid cycle	Gene Ontology	GO:0006099	10	51	0.0379577
Overall	respiratory chain complex I	Gene Ontology	GO:0045271	10	51	0.0379577
Overall	mitochondrial respiratory chain complex I	Gene Ontology	GO:0005747	10	51	0.0379577
Overall	NADH dehydrogenase complex	Gene Ontology	GO:0030964	10	51	0.0379577
Overall	regulation of GTPase activity	Gene Ontology	GO:0043087	11	58	0.0379577
Overall	NAD binding	Gene Ontology	GO:0051287	11	58	0.0379577
Overall	RNA splicing	Gene Ontology	GO:0008380	34	234	0.0380077
Overall	shoot system morphogenesis	Gene Ontology	GO:0010016	27	179	0.038793
Overall	antioxidant activity	Gene Ontology	GO:0016209	23	148	0.0391366
Overall	cellular response to toxic substance	Gene Ontology	GO:0097237	26	172	0.0400813
Overall	mitotic cell cycle process	Gene Ontology	GO:1903047	26	172	0.0400813
Overall	actin filament binding	Gene Ontology	GO:0051015	8	38	0.0400813
Overall	histone acetyltransferase complex	Gene Ontology	GO:0000123	8	38	0.0400813
Overall	response to disaccharide	Gene Ontology	GO:0034285	12	66	0.0400813
Overall	ATPase-coupled ion transmembrane transporter activity	Gene Ontology	GO:0042625	12	66	0.0400813
Overall	aspartyl esterase activity	Gene Ontology	GO:0045330	12	66	0.0400813
Overall	cell cycle G2/M phase transition	Gene Ontology	GO:0044839	6	25	0.0400813
Overall	regulation of cell size	Gene Ontology	GO:0008361	6	25	0.0400813
Overall	wax biosynthetic process	Gene Ontology	GO:0010025	6	25	0.0400813
Overall	regulation of MAP kinase activity	Gene Ontology	GO:0043405	6	25	0.0400813
Overall	quinone metabolic process	Gene Ontology	GO:1901661	6	25	0.0400813
Overall	endoplasmic reticulum organization	Gene Ontology	GO:0007029	6	25	0.0400813
Overall	quinone biosynthetic process	Gene Ontology	GO:1901663	6	25	0.0400813
Overall	peptidyl-proline dioxygenase activity	Gene Ontology	GO:0031543	4	13	0.0400813
Overall	xanthophyll metabolic process	Gene Ontology	GO:0016122	4	13	0.0400813
Overall	mitotic DNA integrity checkpoint	Gene Ontology	GO:0044774	4	13	0.0400813
Overall	malate dehydrogenase activity	Gene Ontology	GO:0016615	4	13	0.0400813
Overall	pyrimidine nucleobase biosynthetic process	Gene Ontology	GO:0019856	4	13	0.0400813
Overall	chromatin silencing by small RNA	Gene Ontology	GO:0031048	4	13	0.0400813
Overall	protein hydroxylation	Gene Ontology	GO:0018126	4	13	0.0400813
Overall	primary shoot apical meristem specification	Gene Ontology	GO:0010072	4	13	0.0400813
Overall	cofactor transmembrane transporter activity	Gene Ontology	GO:0051184	4	13	0.0400813
Overall	positive regulation of isoprenoid metabolic process	Gene Ontology	GO:0045828	4	13	0.0400813
Overall	beta-amyrin synthase activity	Gene Ontology	GO:0042300	4	13	0.0400813
Overall	oxidosqualene cyclase activity	Gene Ontology	GO:0031559	4	13	0.0400813
Overall	cysteine-type endopeptidase inhibitor activity	Gene Ontology	GO:0004869	4	13	0.0400813
Overall	peptidyl-proline hydroxylation	Gene Ontology	GO:0019511	4	13	0.0400813
Overall	DNA-(apurinic or apyrimidinic site) endonuclease activity	Gene Ontology	GO:0003906	4	13	0.0400813
Overall	mucilage biosynthetic process involved in seed coat development	Gene Ontology	GO:0048354	4	13	0.0400813
Overall	entrainment of circadian clock	Gene Ontology	GO:0009649	4	13	0.0400813
Overall	voltage-gated anion channel activity	Gene Ontology	GO:0008308	4	13	0.0400813
Overall	maturation of LSU-rRNA from tricistronic rRNA transcript (SSU-rRNA, 5.8S rRNA, LSU-rRNA)	Gene Ontology	GO:0000463	4	13	0.0400813
Overall	cellular response to salicylic acid stimulus	Gene Ontology	GO:0071446	11	59	0.0401033
Overall	regulation of phosphatase activity	Gene Ontology	GO:0010921	9	45	0.0401033
Overall	photosynthetic electron transport chain	Gene Ontology	GO:0009767	9	45	0.0401033
Overall	mitochondrial outer membrane	Gene Ontology	GO:0005741	10	52	0.0402725
Overall	aldehyde-lyase activity	Gene Ontology	GO:0016832	5	19	0.0405254
Overall	embryonic meristem initiation	Gene Ontology	GO:0090421	5	19	0.0405254
Overall	RNA polymerase II, core complex	Gene Ontology	GO:0005665	5	19	0.0405254
Overall	positive regulation of protein polymerization	Gene Ontology	GO:0032273	5	19	0.0405254
Overall	tricarboxylic acid metabolic process	Gene Ontology	GO:0072350	5	19	0.0405254
Overall	nuclear chromosome, telomeric region	Gene Ontology	GO:0000784	5	19	0.0405254
Overall	potassium ion homeostasis	Gene Ontology	GO:0055075	5	19	0.0405254
Overall	multivesicular body	Gene Ontology	GO:0005771	5	19	0.0405254
Overall	response to oxidative stress	Gene Ontology	GO:0006979	54	400	0.0405254
Overall	cellular detoxification	Gene Ontology	GO:1990748	25	165	0.0405254
Overall	purine nucleotide metabolic process	Gene Ontology	GO:0006163	25	165	0.0405254
Overall	pigment metabolic process	Gene Ontology	GO:0042440	25	165	0.0405254
Overall	plasma membrane bounded cell projection	Gene Ontology	GO:0120025	14	81	0.0405254
Overall	cell projection	Gene Ontology	GO:0042995	16	96	0.0408619
Overall	Golgi stack	Gene Ontology	GO:0005795	28	189	0.0411318
Overall	regulation of protein kinase activity	Gene Ontology	GO:0045859	22	142	0.0412402
Overall	nucleobase-containing compound catabolic process	Gene Ontology	GO:0034655	19	119	0.0414601
Overall	regulation of vesicle-mediated transport	Gene Ontology	GO:0060627	7	32	0.0416275
Overall	regulation of leaf senescence	Gene Ontology	GO:1900055	7	32	0.0416275
Overall	mucilage metabolic process	Gene Ontology	GO:0010191	7	32	0.0416275
Overall	cell fate specification	Gene Ontology	GO:0001708	7	32	0.0416275
Overall	hydrogen peroxide metabolic process	Gene Ontology	GO:0042743	17	104	0.0418267
Overall	glycosyl compound metabolic process	Gene Ontology	GO:1901657	27	182	0.0423164
Overall	GTPase regulator activity	Gene Ontology	GO:0030695	11	60	0.0423164
Overall	negative regulation of protein modification process	Gene Ontology	GO:0031400	11	60	0.0423164
Overall	response to high light intensity	Gene Ontology	GO:0009644	11	60	0.0423164
Overall	regulation of photosynthesis	Gene Ontology	GO:0010109	8	39	0.0423164
Overall	translation elongation factor activity	Gene Ontology	GO:0003746	8	39	0.0423164
Overall	fatty acid derivative metabolic process	Gene Ontology	GO:1901568	8	39	0.0423164
Overall	GTP binding	Gene Ontology	GO:0005525	31	214	0.0423164
Overall	cadmium ion homeostasis	Gene Ontology	GO:0055073	3	8	0.0423164
Overall	histone phosphorylation	Gene Ontology	GO:0016572	3	8	0.0423164
Overall	DNA replication factor A complex	Gene Ontology	GO:0005662	3	8	0.0423164
Overall	endoplasmic reticulum-plasma membrane tethering	Gene Ontology	GO:0061817	3	8	0.0423164
Overall	protein retention in ER lumen	Gene Ontology	GO:0006621	3	8	0.0423164
Overall	Golgi to plasma membrane transport	Gene Ontology	GO:0006893	3	8	0.0423164
Overall	transferase activity, transferring aldehyde or ketonic groups	Gene Ontology	GO:0016744	3	8	0.0423164
Overall	rRNA transcription	Gene Ontology	GO:0009303	3	8	0.0423164
Overall	fatty acid transport	Gene Ontology	GO:0015908	3	8	0.0423164
Overall	C-methyltransferase activity	Gene Ontology	GO:0008169	3	8	0.0423164
Overall	DNA topoisomerase type II (double strand cut, ATP-hydrolyzing) activity	Gene Ontology	GO:0003918	3	8	0.0423164
Overall	glucomannan 4-beta-mannosyltransferase activity	Gene Ontology	GO:0047259	3	8	0.0423164
Overall	endoplasmic reticulum localization	Gene Ontology	GO:0051643	3	8	0.0423164
Overall	positive regulation of brassinosteroid mediated signaling pathway	Gene Ontology	GO:1900459	3	8	0.0423164
Overall	double-strand break repair via break-induced replication	Gene Ontology	GO:0000727	3	8	0.0423164
Overall	regulation of lignin biosynthetic process	Gene Ontology	GO:1901141	3	8	0.0423164
Overall	regulation of defense response to virus by host	Gene Ontology	GO:0050691	3	8	0.0423164
Overall	multicellular organismal homeostasis	Gene Ontology	GO:0048871	3	8	0.0423164
Overall	mucilage extrusion from seed coat	Gene Ontology	GO:0080001	3	8	0.0423164
Overall	positive regulation of reactive oxygen species metabolic process	Gene Ontology	GO:2000379	3	8	0.0423164
Overall	positive regulation of sulfur metabolic process	Gene Ontology	GO:0051176	3	8	0.0423164
Overall	positive regulation of response to salt stress	Gene Ontology	GO:1901002	3	8	0.0423164
Overall	positive regulation of alcohol biosynthetic process	Gene Ontology	GO:1902932	3	8	0.0423164
Overall	regulation of chromatin organization	Gene Ontology	GO:1902275	10	53	0.0423351
Overall	lateral root formation	Gene Ontology	GO:0010311	9	46	0.0423886
Overall	protein import	Gene Ontology	GO:0017038	19	120	0.042695
Overall	disulfide oxidoreductase activity	Gene Ontology	GO:0015036	13	75	0.0431024
Overall	cell cycle process	Gene Ontology	GO:0022402	50	370	0.0431024
Overall	transcription by RNA polymerase I	Gene Ontology	GO:0006360	6	26	0.0431024
Overall	late endosome to vacuole transport	Gene Ontology	GO:0045324	6	26	0.0431024
Overall	wax metabolic process	Gene Ontology	GO:0010166	6	26	0.0431024
Overall	positive regulation of chromosome organization	Gene Ontology	GO:2001252	6	26	0.0431024
Overall	regulation of secondary cell wall biogenesis	Gene Ontology	GO:2000652	6	26	0.0431024
Overall	positive regulation of cell communication	Gene Ontology	GO:0010647	15	90	0.0434344
Overall	RNA helicase activity	Gene Ontology	GO:0003724	12	68	0.0440438
Overall	cell cycle phase transition	Gene Ontology	GO:0044770	12	68	0.0440438
Overall	photoperiodism, flowering	Gene Ontology	GO:0048573	16	98	0.044577
Overall	actin filament-based process	Gene Ontology	GO:0030029	16	98	0.044577
Overall	regulation of protein serine/threonine kinase activity	Gene Ontology	GO:0071900	14	83	0.0446585
Overall	cell fate commitment	Gene Ontology	GO:0045165	11	61	0.0448258
Overall	chloroplast organization	Gene Ontology	GO:0009658	25	168	0.0448258
Overall	long-chain fatty acid metabolic process	Gene Ontology	GO:0001676	5	20	0.0448573
Overall	rejection of self pollen	Gene Ontology	GO:0060320	5	20	0.0448573
Overall	regulation of shoot system development	Gene Ontology	GO:0048831	31	216	0.0449296
Overall	dephosphorylation	Gene Ontology	GO:0016311	44	322	0.0449353
Overall	H4 histone acetyltransferase complex	Gene Ontology	GO:1902562	4	14	0.0449566
Overall	photoreceptor activity	Gene Ontology	GO:0009881	4	14	0.0449566
Overall	proline metabolic process	Gene Ontology	GO:0006560	4	14	0.0449566
Overall	positive regulation of cell growth	Gene Ontology	GO:0030307	4	14	0.0449566
Overall	COPII vesicle coat	Gene Ontology	GO:0030127	4	14	0.0449566
Overall	chaperone complex	Gene Ontology	GO:0101031	4	14	0.0449566
Overall	negative regulation of gibberellic acid mediated signaling pathway	Gene Ontology	GO:0009938	4	14	0.0449566
Overall	tracheary element differentiation	Gene Ontology	GO:1905177	4	14	0.0449566
Overall	triterpenoid biosynthetic process	Gene Ontology	GO:0016104	4	14	0.0449566
Overall	beta-galactosidase activity	Gene Ontology	GO:0004565	4	14	0.0449566
Overall	CCR4-NOT core complex	Gene Ontology	GO:0030015	4	14	0.0449566
Overall	regulation of protein depolymerization	Gene Ontology	GO:1901879	4	14	0.0449566
Overall	salicylic acid mediated signaling pathway	Gene Ontology	GO:0009863	10	54	0.0449908
Overall	cytosolic small ribosomal subunit	Gene Ontology	GO:0022627	17	106	0.0450009
Overall	trans-Golgi network	Gene Ontology	GO:0005802	37	265	0.045084
Overall	cellular biogenic amine biosynthetic process	Gene Ontology	GO:0042401	8	40	0.045084
Overall	regulation of cofactor metabolic process	Gene Ontology	GO:0051193	8	40	0.045084
Overall	regulation of transmembrane transport	Gene Ontology	GO:0034762	8	40	0.045084
Overall	amine biosynthetic process	Gene Ontology	GO:0009309	8	40	0.045084
Overall	exocytosis	Gene Ontology	GO:0006887	9	47	0.0451088
Overall	regulation of dephosphorylation	Gene Ontology	GO:0035303	9	47	0.0451088
Overall	Golgi-associated vesicle membrane	Gene Ontology	GO:0030660	9	47	0.0451088
Overall	Golgi-associated vesicle	Gene Ontology	GO:0005798	13	76	0.0451159
Overall	dicarboxylic acid metabolic process	Gene Ontology	GO:0043648	13	76	0.0451159
Overall	anther development	Gene Ontology	GO:0048653	12	69	0.0462498
Overall	cellular amine metabolic process	Gene Ontology	GO:0044106	12	69	0.0462498
Overall	pollen tube	Gene Ontology	GO:0090406	12	69	0.0462498
Overall	carbon-carbon lyase activity	Gene Ontology	GO:0016830	16	99	0.0462562
Overall	Golgi vesicle transport	Gene Ontology	GO:0048193	20	130	0.046651
Overall	oxidative phosphorylation	Gene Ontology	GO:0006119	6	27	0.0471655
Overall	replication fork	Gene Ontology	GO:0005657	6	27	0.0471655
Overall	cortical cytoskeleton	Gene Ontology	GO:0030863	6	27	0.0471655
Overall	regulation of kinase activity	Gene Ontology	GO:0043549	22	146	0.0472886
Overall	polymeric cytoskeletal fiber	Gene Ontology	GO:0099513	23	154	0.0474574
Overall	supramolecular fiber	Gene Ontology	GO:0099512	23	154	0.0474574
Overall	supramolecular polymer	Gene Ontology	GO:0099081	23	154	0.0474574
Overall	vegetative to reproductive phase transition of meristem	Gene Ontology	GO:0010228	27	186	0.0477638
Overall	iron ion transport	Gene Ontology	GO:0006826	13	77	0.0477638
Overall	endoplasmic reticulum to Golgi vesicle-mediated transport	Gene Ontology	GO:0006888	13	77	0.0477638
Overall	endocytosis	Gene Ontology	GO:0006897	10	55	0.0478505
Overall	activation of immune response	Gene Ontology	GO:0002253	10	55	0.0478505
Overall	activation of innate immune response	Gene Ontology	GO:0002218	10	55	0.0478505
Overall	regulation of jasmonic acid mediated signaling pathway	Gene Ontology	GO:2000022	7	34	0.048327
Overall	regulation of photoperiodism, flowering	Gene Ontology	GO:2000028	9	48	0.0484588
Overall	nuclear body	Gene Ontology	GO:0016604	16	100	0.0484916
Overall	mitochondrial matrix	Gene Ontology	GO:0005759	20	131	0.0485164
Overall	supramolecular complex	Gene Ontology	GO:0099080	33	235	0.0485164
Overall	monocarboxylic acid binding	Gene Ontology	GO:0033293	8	41	0.0485469
Overall	nitrogen cycle metabolic process	Gene Ontology	GO:0071941	8	41	0.0485469
Overall	oxidoreductase activity, acting on the CH-OH group of donors, NAD or NADP as acceptor	Gene Ontology	GO:0016616	21	139	0.0487765
Overall	phosphatidylinositol metabolic process	Gene Ontology	GO:0046488	12	70	0.0487841
Overall	auxin metabolic process	Gene Ontology	GO:0009850	12	70	0.0487841
Overall	defense response to oomycetes	Gene Ontology	GO:0002229	12	70	0.0487841
Overall	Golgi membrane	Gene Ontology	GO:0000139	48	359	0.0488942
Overall	cytoskeleton organization	Gene Ontology	GO:0007010	30	211	0.0488942
Overall	amine metabolic process	Gene Ontology	GO:0009308	17	108	0.0489469
Overall	hexose metabolic process	Gene Ontology	GO:0019318	17	108	0.0489469
Overall	lipid modification	Gene Ontology	GO:0030258	17	108	0.0489469
Overall	cellular oxidant detoxification	Gene Ontology	GO:0098869	23	155	0.0489776
Overall	negative regulation of mitotic cell cycle phase transition	Gene Ontology	GO:1901991	5	21	0.0490632
Overall	protein homooligomerization	Gene Ontology	GO:0051260	5	21	0.0490632
Overall	glycerol metabolic process	Gene Ontology	GO:0006071	5	21	0.0490632
Overall	negative regulation of cell cycle phase transition	Gene Ontology	GO:1901988	5	21	0.0490632
Overall	positive regulation of transport	Gene Ontology	GO:0051050	5	21	0.0490632
Overall	positive regulation of MAP kinase activity	Gene Ontology	GO:0043406	5	21	0.0490632
Overall	anther dehiscence	Gene Ontology	GO:0009901	5	21	0.0490632
Overall	ribonucleoprotein complex subunit organization	Gene Ontology	GO:0071826	18	116	0.0491126
Overall	nucleotide catabolic process	Gene Ontology	GO:0009166	3	9	0.0491126
Overall	neurotransmitter catabolic process	Gene Ontology	GO:0042135	3	9	0.0491126
Overall	GDP-dissociation inhibitor activity	Gene Ontology	GO:0005092	3	9	0.0491126
Overall	endoplasmic reticulum membrane organization	Gene Ontology	GO:0090158	3	9	0.0491126
Overall	maintenance of protein localization in endoplasmic reticulum	Gene Ontology	GO:0035437	3	9	0.0491126
Overall	production of siRNA involved in chromatin silencing by small RNA	Gene Ontology	GO:0070919	3	9	0.0491126
Overall	cellular response to disaccharide stimulus	Gene Ontology	GO:0071324	3	9	0.0491126
Overall	regulation of auxin biosynthetic process	Gene Ontology	GO:0010600	3	9	0.0491126
Overall	ribosomal large subunit binding	Gene Ontology	GO:0043023	3	9	0.0491126
Overall	induced systemic resistance, jasmonic acid mediated signaling pathway	Gene Ontology	GO:0009864	3	9	0.0491126
Overall	phosphorus-oxygen lyase activity	Gene Ontology	GO:0016849	3	9	0.0491126
Overall	transcription factor complex	Gene Ontology	GO:0005667	15	93	0.04917
Overall	protein disulfide oxidoreductase activity	Gene Ontology	GO:0015035	11	63	0.04917
Overall	cell	Gene Ontology	GO:0005623	11	63	0.04917

## Sheet: Table S6
Table S6 Summary of 51 climate variables gathered for this analysis and sources of information.
Environmental variable	Source	URL	Grid resolution
BIO1 = Annual Mean Temperature	WorldClim (World Cliamte Database, Global climate and weather data)	http://www.worldclim.org/current	2.5 arc-minutes （~5km)
BIO2 = Mean Diurnal Range (Mean of monthly (max temp - min temp))	WorldClim (World Cliamte Database, Global climate and weather data)	http://www.worldclim.org/current	2.5 arc-minutes （~5km)
BIO3 = Isothermality (BIO2/BIO7) (* 100)	WorldClim (World Cliamte Database, Global climate and weather data)	http://www.worldclim.org/current	2.5 arc-minutes （~5km)
BIO4 = Temperature Seasonality (standard deviation *100)	WorldClim (World Cliamte Database, Global climate and weather data)	http://www.worldclim.org/current	2.5 arc-minutes （~5km)
BIO5 = Max Temperature of Warmest Month	WorldClim (World Cliamte Database, Global climate and weather data)	http://www.worldclim.org/current	2.5 arc-minutes （~5km)
BIO6 = Min Temperature of Coldest Month	WorldClim (World Cliamte Database, Global climate and weather data)	http://www.worldclim.org/current	2.5 arc-minutes （~5km)
BIO7 = Temperature Annual Range (BIO5-BIO6)	WorldClim (World Cliamte Database, Global climate and weather data)	http://www.worldclim.org/current	2.5 arc-minutes （~5km)
BIO8 = Mean Temperature of Wettest Quarter	WorldClim (World Cliamte Database, Global climate and weather data)	http://www.worldclim.org/current	2.5 arc-minutes （~5km)
BIO9 = Mean Temperature of Driest Quarter	WorldClim (World Cliamte Database, Global climate and weather data)	http://www.worldclim.org/current	2.5 arc-minutes （~5km)
BIO10 = Mean Temperature of Warmest Quarter	WorldClim (World Cliamte Database, Global climate and weather data)	http://www.worldclim.org/current	2.5 arc-minutes （~5km)
BIO11 = Mean Temperature of Coldest Quarter	WorldClim (World Cliamte Database, Global climate and weather data)	http://www.worldclim.org/current	2.5 arc-minutes （~5km)
BIO12 = Annual Precipitation	WorldClim (World Cliamte Database, Global climate and weather data)	http://www.worldclim.org/current	2.5 arc-minutes （~5km)
BIO13 = Precipitation of Wettest Month	WorldClim (World Cliamte Database, Global climate and weather data)	http://www.worldclim.org/current	2.5 arc-minutes （~5km)
BIO14 = Precipitation of Driest Month	WorldClim (World Cliamte Database, Global climate and weather data)	http://www.worldclim.org/current	2.5 arc-minutes （~5km)
BIO15 = Precipitation Seasonality (Coefficient of Variation)	WorldClim (World Cliamte Database, Global climate and weather data)	http://www.worldclim.org/current	2.5 arc-minutes （~5km)
BIO16 = Precipitation of Wettest Quarter	WorldClim (World Cliamte Database, Global climate and weather data)	http://www.worldclim.org/current	2.5 arc-minutes （~5km)
BIO17 = Precipitation of Driest Quarter	WorldClim (World Cliamte Database, Global climate and weather data)	http://www.worldclim.org/current	2.5 arc-minutes （~5km)
BIO18 = Precipitation of Warmest Quarter	WorldClim (World Cliamte Database, Global climate and weather data)	http://www.worldclim.org/current	2.5 arc-minutes （~5km)
BIO19 = Precipitation of Coldest Quarter	WorldClim (World Cliamte Database, Global climate and weather data)	http://www.worldclim.org/current	2.5 arc-minutes （~5km)
Soil pH	FAO (The Food and Agriculture Organization)，GeoNetwork	http://www.fao.org/geonetwork/srv/en/main.home	5 arc-Minutes (~9 km)
Winter accumulated chill	WorldClim (World Cliamte Database, Global climate and weather data)	http://www.worldclim.org/current	2.5 arc-minutes （~5km)
Mean temperature from Feb. to Apr.	WorldClim (World Cliamte Database, Global climate and weather data)	http://www.worldclim.org/current	2.5 arc-minutes （~5km)
Number of days frost free	FAO (The Food and Agriculture Organization)，GeoNetwork	http://www.fao.org/geonetwork/srv/en/main.home	10 arc-Minutes (~18 km)
Aridity	FAO (The Food and Agriculture Organization)，GeoNetwork	http://www.fao.org/geonetwork/srv/en/main.home	10 arc-Minutes (~18 km)
Altitude	Our own data	We detected the altitude during we collect the accessions.	NA
Latitude	Our own data	We detected the latitude during we collect the accessions.	NA
Annual minimum temperature	CMDC (China Meteorological Data Center)	http://data.cma.cn/data/index.html	NA
Annual maximum temperature	CMDC (China Meteorological Data Center)	http://data.cma.cn/data/index.html	NA
Length of growing period (based on temperature and potential evaporation relative to precipitation by month)	FAO (The Food and Agriculture Organization)，GeoNetwork	http://www.fao.org/geonetwork/srv/en/main.home	5 arc-Minutes (~9 km)
Spring mean temperature	WorldClim (World Cliamte Database, Global climate and weather data)	http://www.worldclim.org/current	2.5 arc-minutes （~5km)
Summer mean temperature	WorldClim (World Cliamte Database, Global climate and weather data)	http://www.worldclim.org/current	2.5 arc-minutes （~5km)
Autumn mean temperature	WorldClim (World Cliamte Database, Global climate and weather data)	http://www.worldclim.org/current	2.5 arc-minutes （~5km)
Winter mean temperature	WorldClim (World Cliamte Database, Global climate and weather data)	http://www.worldclim.org/current	2.5 arc-minutes （~5km)
Spring relative humidity	CMDC (China Meteorological Data Center)	http://data.cma.cn/data/index.html	NA
Summer relative humidity	CMDC (China Meteorological Data Center)	http://data.cma.cn/data/index.html	NA
Autumn relative humidity	CMDC (China Meteorological Data Center)	http://data.cma.cn/data/index.html	NA
Winter relative humidity	CMDC (China Meteorological Data Center)	http://data.cma.cn/data/index.html	NA
Spring mean precipitation	WorldClim (World Cliamte Database, Global climate and weather data)	http://www.worldclim.org/current	2.5 arc-minutes （~5km)
Summer mean precipitation	WorldClim (World Cliamte Database, Global climate and weather data)	http://www.worldclim.org/current	2.5 arc-minutes （~5km)
Autumn mean precipitation	WorldClim (World Cliamte Database, Global climate and weather data)	http://www.worldclim.org/current	2.5 arc-minutes （~5km)
Winter mean precipitation	WorldClim (World Cliamte Database, Global climate and weather data)	http://www.worldclim.org/current	2.5 arc-minutes （~5km)
Annual solar radiation	WorldClim (World Cliamte Database, Global climate and weather data)	http://worldclim.org/version2	2.5 arc-minutes （~5km)
Annual water vapor pressure	WorldClim (World Cliamte Database, Global climate and weather data)	http://worldclim.org/version2	2.5 arc-minutes （~5km)
Spring solar radiation	WorldClim (World Cliamte Database, Global climate and weather data)	http://worldclim.org/version2	2.5 arc-minutes （~5km)
Summer solar radiation	WorldClim (World Cliamte Database, Global climate and weather data)	http://worldclim.org/version2	2.5 arc-minutes （~5km)
Autumn solar radiation	WorldClim (World Cliamte Database, Global climate and weather data)	http://worldclim.org/version2	2.5 arc-minutes （~5km)
Winter solar radiation	WorldClim (World Cliamte Database, Global climate and weather data)	http://worldclim.org/version2	2.5 arc-minutes （~5km)
Spring water vapor pressure	WorldClim (World Cliamte Database, Global climate and weather data)	http://worldclim.org/version2	2.5 arc-minutes （~5km)
Summer water vapor pressure	WorldClim (World Cliamte Database, Global climate and weather data)	http://worldclim.org/version2	2.5 arc-minutes （~5km)
Autumn water vapor pressure	WorldClim (World Cliamte Database, Global climate and weather data)	http://worldclim.org/version2	2.5 arc-minutes （~5km)
Winter water vapor pressure	WorldClim (World Cliamte Database, Global climate and weather data)	http://worldclim.org/version2	2.5 arc-minutes （~5km)

## Sheet: Table S7
Table S7 Climate data for the 263 accessions used in the analyses. NA indicates missing data.
Accession	Altitude (m)	Aridity index	BIO1 = Annual Mean Temperature	BIO2 = Mean Diurnal Range (Mean of monthly (max temp - min temp))	BIO3 = Isothermality (BIO2/BIO7) (* 100)	BIO4 = Temperature Seasonality (standard deviation *100)	BIO5 = Max Temperature of Warmest Month	BIO6 = Min Temperature of Coldest Month	BIO7 = Temperature Annual Range (BIO5-BIO6)	BIO8 = Mean Temperature of Wettest Quarter	BIO9 = Mean Temperature of Driest Quarter	BIO10 = Mean Temperature of Warmest Quarter	BIO11 = Mean Temperature of Coldest Quarter	BIO12 = Annual Precipitation	BIO13 = Precipitation of Wettest Month	BIO14 = Precipitation of Driest Month	BIO15 = Precipitation Seasonality (Coefficient of Variation)	BIO16 = Precipitation of Wettest Quarter	BIO17 = Precipitation of Driest Quarter	BIO18 = Precipitation of Warmest Quarter	BIO19 = Precipitation of Coldest Quarter	Spring precipitation (mm)	Spring air relative humidity (%)	Spring solar radiation (kJm-2day-1)	Spring mean temperature (℃)	Spring water vapor pressure (kPa)	Summer precipitation (mm)	Summer air relative humidity (%)	Summer solar radiation (kJm-2day-1)	Summer mean temperature (℃)	Summer water vapor pressure (kPa)	Autumn precipitation (mm)	Autumn air relative humidity (%)	Autumn solar radiation (kJ m-2 day-1)	Autumn mean temperature (℃)	Autumn water vapor pressure (kPa)	Winter precipitation (mm)	Winter air relative humidity (%)	Winter solar radiation (kJm-2day-1)	Winter mean temperature (℃)	Winter water vapor pressure (kPa)	Annual solar radiation (kJm-2day-1)	Annual water vapor pressure (kPa)	Mean temperature from Feb. to Apr.	Winter accumulated chill	Frost free days	Latitude	Length of the growing season	Annual maximum temperature (℃)
Anlong Bai Tao	1409	1.262	16.375	8.71667	36.6246	570.958	27	3.2	23.8	22.5833	8.55	22.5833	8.55	1352	259	18	82.4557	727	66	727	66	123	73.41	13685.3	13.7667	1.04	672	78.59	16717.3	21.9667	1.95	471	80.35	14935.3	20	1.76667	86	78.17	9167.67	9.73333	0.896667	13626.4	1.41333	13.7667	3413.12	11	25.14	13	35.882
Bai He Tao	1230	1.296	17.3708	8.775	35.6707	602.768	28.7	4.1	24.6	24.0667	9.18333	24.0667	9.18333	1296	248	13	81.9973	692	58	692	58	142	76.12	12895	14.3	1.09667	657	79.33	16728.7	23.2	2.08333	422	80.13	15030	21.3667	1.87	75	78.77	8841.67	10.6	0.906667	13373.8	1.48917	14.3	3337.44	12	25.23	13	36.378
Bai Li Hu	1303	1.222	15.5958	7.80833	29.2447	701.633	28.7	2	26.7	22.3333	6.36667	23.8	6.36667	1196	218	21	70.7396	586	68	539	68	167	78.67	11887.7	11.4333	0.98	586	79.87	16282	22.3	1.96333	346	80.26	14579.7	20.4667	1.75333	97	80.41	7774.67	8.03333	0.786667	12631	1.37083	11.4333	3616.08	10	26.63	12	35.9728
Bai Nian He	676	1.356	15.975	8.46667	29.0951	765.098	30.4	1.3	29.1	23.2167	6.03333	24.9333	6.03333	1186	196	30	57.9406	516	104	460	104	230	79.53	11254.3	11.0667	1.07	516	80.25	16864.3	23.2	2.28	316	78.4	15727	21.5333	2.01	124	77.7	8155.33	8	0.823333	13000.2	1.54583	11.0667	3626.4	10	26.65	12	35.9728
Jushan Tong Tao	1391	1.135	16.8083	9.36667	39.3557	547.278	27	3.2	23.8	22.6333	9.26667	22.6333	9.26667	1245	238	17	82.6815	672	60	672	60	104	70.33	14204	14.6333	1.05667	608	77.59	16560	22.3667	1.94667	451	80.41	14625.3	20.2333	1.78333	82	77.27	9455.67	10.4333	0.933333	13711.2	1.43	14.6333	3334	12	25	12	35.219
Guizhou Shui Mi	1391	1.135	16.8083	9.36667	39.3557	547.278	27	3.2	23.8	22.6333	9.26667	22.6333	9.26667	1245	238	17	82.6815	672	60	672	60	104	70.33	14204	14.6333	1.05667	608	77.59	16560	22.3667	1.94667	451	80.41	14625.3	20.2333	1.78333	82	77.27	9455.67	10.4333	0.933333	13711.2	1.43	14.6333	3334	12	25	12	36.378
Pingyong Tao	1409	1.262	16.375	8.71667	36.6246	570.958	27	3.2	23.8	22.5833	8.55	22.5833	8.55	1352	259	18	82.4557	727	66	727	66	123	73.41	13685.3	13.7667	1.04	672	78.59	16717.3	21.9667	1.95	471	80.35	14935.3	20	1.76667	86	78.17	9167.67	9.73333	0.896667	13626.4	1.41333	13.7667	3413.12	11	25.14	13	37.3292
Qiu Bai Tao	2005	0.866	17.4208	10.6917	47.7307	429.881	26.9	4.5	22.4	22.0667	11.6833	22.0667	11.6833	982	200	13	88.1006	560	43	560	43	61	62.59	17561	15.9333	1.00667	456	75.61	16274.7	21.7667	1.92	393	80.5	14311.7	19.8333	1.83	72	74.97	12269	12.1333	0.99	15104.1	1.43667	15.9333	3120.72	13	24.26	10	34.986
Er Zao Tao	2024	0.923	15.4583	10.3667	46.0741	453.501	24.6	2.1	22.5	20.3	9.31667	20.3	9.31667	1016	213	13	91.1508	594	42	594	42	61	61.52	17170.3	13.5333	0.936667	481	74.59	16053.7	20.0667	1.86	409	79.91	13958.3	18.1667	1.76667	65	74.31	12054	9.96667	0.91	14809.1	1.36833	13.5333	3364.96	11	24.87	11	34.986
Wangmo Xiao Mi Tao	1717	1.004	17.0875	9.475	45.7729	425.559	26	5.3	20.7	21.45	11.3	21.45	11.3	1144	255	11	87.8383	645	50	645	50	116	70.49	16087.7	15.1	1.15333	553	78.66	16600.3	20.9667	1.92	396	81.55	14925.3	18.9667	1.77667	79	78.27	11583	11.3667	1.03	14799.1	1.47	15.1	3203.28	12	23.35	13	36.7318
Wuda Tao	1630	0.876	18.6	10.7667	47.016	439.69	28.5	5.6	22.9	23.35	14.3833	23.35	12.75	914	180	13	85.655	511	43	511	43	58	63.08	17475.7	17.1	1.1	421	75.77	16358.7	23.0667	2.05667	363	80.61	14382	20.9667	1.96667	72	75.18	12322	13.2	1.07333	15134.6	1.54917	17.1	3010.64	12	24.37	11	36.378
Jiuyang Qing Tao	1303	1.222	15.5958	7.80833	29.2447	701.633	28.7	2	26.7	22.3333	6.36667	23.8	6.36667	1196	218	21	70.7396	586	68	539	68	167	78.67	11887.7	11.4333	0.98	586	79.87	16282	22.3	1.96333	346	80.26	14579.7	20.4667	1.75333	97	80.41	7774.67	8.03333	0.786667	12631	1.37083	11.4333	3616.08	10	26.63	12	37.2189
Xingyi Bai Hua Tao	1954	0.934	16.1417	10.5167	47.1599	441.052	25.3	3	22.3	20.9	10.2167	20.9	10.2167	991	206	13	90.1899	574	42	574	42	59	61.43	17457.7	14.5	0.986667	464	74.66	16140.7	20.6333	1.92667	401	79.94	14168.7	18.6667	1.83667	67	74.29	12359.3	10.8	0.97	15031.6	1.43	14.5	3265.2	11	24.61	11	35.219
Xingyi Wu Yue Tao	2736	0.912	11.4667	11.55	46.9512	492.006	21.6	-3	24.6	16.9333	4.91667	16.9333	4.91667	1019	265	6	103.058	637	27	637	27	56	58.8	15244	9.3	0.566667	540	73.64	15453	16.4667	1.34333	384	79.55	13127.3	14.4667	1.28333	39	70.93	10430.3	5.53333	0.563333	13563.7	0.939167	9.3	3812.16	10	26.63	10	35.219
Qing Tao	2024	0.923	15.4583	10.3667	46.0741	453.501	24.6	2.1	22.5	20.3	9.31667	20.3	9.31667	1016	213	13	91.1508	594	42	594	42	61	61.52	17170.3	13.5333	0.936667	481	74.59	16053.7	20.0667	1.86	409	79.91	13958.3	18.1667	1.76667	65	74.31	12054	9.96667	0.91	14809.1	1.36833	13.5333	3364.96	11	24.87	11	35.882
Kuanxi Tao	1717	1.004	17.0875	9.475	45.7729	425.559	26	5.3	20.7	21.45	11.3	21.45	11.3	1144	255	11	87.8383	645	50	645	50	116	70.49	16087.7	15.1	1.15333	553	78.66	16600.3	20.9667	1.92	396	81.55	14925.3	18.9667	1.77667	79	78.27	11583	11.3667	1.03	14799.1	1.47	15.1	3203.28	12	23.35	13	34.8196
Da Jin Dan	2024	0.923	15.4583	10.3667	46.0741	453.501	24.6	2.1	22.5	20.3	9.31667	20.3	9.31667	1016	213	13	91.1508	594	42	594	42	61	61.52	NA	NA	NA	481	74.59	NA	NA	NA	409	79.91	NA	NA	NA	65	74.31	NA	NA	NA	NA	NA	NA	NA	11	24.87	11	34.986
Bai Nian Hu	1717	1.004	17.0875	9.475	45.7729	425.559	26	5.3	20.7	21.45	11.3	21.45	11.3	1144	255	11	87.8383	645	50	645	50	116	70.49	16087.7	15.1	1.15333	553	78.66	16600.3	20.9667	1.92	396	81.55	14925.3	18.9667	1.77667	79	78.27	11583	11.3667	1.03	14799.1	1.47	15.1	3203.28	12	23.35	13	35.9728
Feijing Tao	1717	1.004	17.0875	9.475	45.7729	425.559	26	5.3	20.7	21.45	11.3	21.45	11.3	1144	255	11	87.8383	645	50	645	50	116	70.49	16087.7	15.1	1.15333	553	78.66	16600.3	20.9667	1.92	396	81.55	14925.3	18.9667	1.77667	79	78.27	11583	11.3667	1.03	14799.1	1.47	15.1	3203.28	12	23.35	13	34.7941
Huang Yan	1391	1.135	16.8083	9.36667	39.3557	547.278	27	3.2	23.8	22.6333	9.26667	22.6333	9.26667	1245	238	17	82.6815	672	60	672	60	104	70.33	14204	14.6333	1.05667	608	77.59	16560	22.3667	1.94667	451	80.41	14625.3	20.2333	1.78333	82	77.27	9455.67	10.4333	0.933333	13711.2	1.43	14.6333	3334	12	25	12	34.7796
Qing Si	1303	1.222	15.5958	7.80833	29.2447	701.633	28.7	2	26.7	22.3333	6.36667	23.8	6.36667	1196	218	21	70.7396	586	68	539	68	167	78.67	11887.7	11.4333	0.98	586	79.87	16282	22.3	1.96333	346	80.26	14579.7	20.4667	1.75333	97	80.41	7774.67	8.03333	0.786667	12631	1.37083	11.4333	3616.08	10	26.63	12	34.4575
Huo Lian Jin Dan	710	1.285	16.2292	8.25833	29.494	736.162	30.2	2.2	28	23.2	6.61667	24.8	6.61667	1210	204	27	62.3853	554	90	494	90	212	78.58	11485.7	11.6	1.09	554	79.81	16703.7	23.1667	2.27	329	78.67	15371.3	21.5	2.01333	115	78.1	8014	8.5	0.856667	12893.7	1.5575	11.6	3578.24	10	26.58	13	34.986
Huang Nian Hu	2024	0.923	15.4583	10.3667	46.0741	453.501	24.6	2.1	22.5	20.3	9.31667	20.3	9.31667	1016	213	13	91.1508	594	42	594	42	61	61.52	17170.3	13.5333	0.936667	481	74.59	16053.7	20.0667	1.86	409	79.91	13958.3	18.1667	1.76667	65	74.31	12054	9.96667	0.91	14809.1	1.36833	13.5333	3364.96	11	24.87	11	35.9728
Xiao Jin Dan	2024	0.923	15.4583	10.3667	46.0741	453.501	24.6	2.1	22.5	20.3	9.31667	20.3	9.31667	1016	213	13	91.1508	594	42	594	42	61	61.52	17170.3	13.5333	0.936667	481	74.59	16053.7	20.0667	1.86	409	79.91	13958.3	18.1667	1.76667	65	74.31	12054	9.96667	0.91	14809.1	1.36833	13.5333	3364.96	11	24.87	11	35.0257
Xinjiang Huang Rou	1327	0.102	11.6542	12.7583	29.3971	1116.27	32	-11.4	43.4	19.1167	4.43333	24.15	-3.41667	73	12	2	47.2589	27	8	24	11	19	45.95	14437.3	6.96667	0.49	27	42.65	23460.3	22.5333	1.09667	18	49.12	17790.7	18.6333	1.04	9	58.58	8556.33	-1.66667	0.353333	16061.2	0.745	6.96667	3860.2	8	39.52	2	36.4401
Zao Shu Huang Gan	1114	0.602	10.2167	9.98333	27.2025	972.425	28	-8.7	36.7	20.2667	-2.35	21.9	-2.35	556	111	4	84.8882	309	15	280	15	63	54.37	14555.7	5.2	0.493333	225	60.47	20782	20.2333	1.48	243	72.4	15262.3	16.1667	1.39667	25	58.59	9532.33	-0.866667	0.346667	15033.1	0.929167	5.2	3757.6	8	35.57	7	37.7
Xiamiao 1	1405	0.1	7.99583	15.1083	32.8442	1125.87	29.6	-16.4	46	21.05	-6.8	21.05	-6.8	107	26	1	103.392	67	3	67	3	7	39.2	16299.3	2.63333	0.223333	52	44.76	23287.3	19.2667	0.836667	44	51.2	17995	15.1333	0.726667	4	50.73	9204	-5.16667	0.166667	16696.4	0.488333	2.63333	4016.8	7	39.35	1	38.6185
Long 1-2-4	1359	0.029	12.9375	12.325	29.2755	1106.05	32.7	-9.4	42.1	23.8	5.21667	25.1833	-1.96667	34	7	0	82.2	19	2	15	5	6	37.66	14835.3	9	0.416667	19	40.6	21909	23.7667	1.17	6	46.99	17497.3	19.6	1.09667	3	52.59	9694	-0.7	0.31	15983.9	0.748333	9	3784.6	9	37.12	1	37.7
Long 2-4-6	1114	0.602	10.2167	9.98333	27.2025	972.425	28	-8.7	36.7	20.2667	-2.35	21.9	-2.35	556	111	4	84.8882	309	15	280	15	63	54.37	14555.7	5.2	0.493333	225	60.47	20782	20.2333	1.48	243	72.4	15262.3	16.1667	1.39667	25	58.59	9532.33	-0.866667	0.346667	15033.1	0.929167	5.2	3757.6	8	35.57	7	37.7
Long 1-2-6	1704	0.113	-3.2875	11.6917	27.5747	1085.38	17.7	-24.7	42.4	9.45	-8.81667	9.45	-17.4	44	9	0	85.7197	22	3	22	4	6	40.94	13900.7	-9.46667	0.12	21	41.36	21141.3	7.06667	0.326667	14	46.89	16112.3	5.23333	0.306667	3	52.52	8482.33	-14.4333	0.0666667	14909.2	0.205	-9.46667	4583.8	1	36.99	2	37.7
Long 1-2-3	1114	0.602	10.2167	9.98333	27.2025	972.425	28	-8.7	36.7	20.2667	-2.35	21.9	-2.35	556	111	4	84.8882	309	15	280	15	63	54.37	14555.7	5.2	0.493333	225	60.47	20782	20.2333	1.48	243	72.4	15262.3	16.1667	1.39667	25	58.59	9532.33	-0.866667	0.346667	15033.1	0.929167	5.2	3757.6	8	35.57	7	37.7
Da Li He Huang Rou	1704	0.113	-3.2875	11.6917	27.5747	1085.38	17.7	-24.7	42.4	9.45	-8.81667	9.45	-17.4	44	9	0	85.7197	22	3	22	4	6	40.94	13900.7	-9.46667	0.12	21	41.36	21141.3	7.06667	0.326667	14	46.89	16112.3	5.23333	0.306667	3	52.52	8482.33	-14.4333	0.0666667	14909.2	0.205	-9.46667	4583.8	1	36.99	2	38.8792
Yexiang Huang Rou Tao	509	0.6	14.3458	10.6917	26.9992	1059.25	33.3	-6.3	39.6	25.1	0.7	27.1167	0.7	532	110	5	80.9139	285	18	263	18	65	57.38	14031.7	9	0.563333	201	64.59	20370.3	25.4667	1.66333	237	74.84	15344.7	20.7	1.56667	29	61.28	9243.67	2.1	0.4	14747.6	1.04833	9	3617.2	9	34.88	9	36.3214
Jiangcun 4	635	0.248	9.02083	13.2417	29.0387	1176.41	30.4	-15.2	45.6	17.1167	-6.85	22.1333	-6.85	248	27	14	23.2819	79	50	64	50	64	60.54	14266.7	3.4	0.453333	76	48.31	23142	20.5667	1.16667	51	53.62	17050.3	16.3667	0.95	57	72.47	7190.67	-4.36667	0.313333	15412.4	0.720833	3.4	4043.8	7	43.92	3	37.7
Lin Huang 1	1327	0.102	11.6542	12.7583	29.3971	1116.27	32	-11.4	43.4	19.1167	4.43333	24.15	-3.41667	73	12	2	47.2589	27	8	24	11	19	45.95	14437.3	6.96667	0.49	27	42.65	23460.3	22.5333	1.09667	18	49.12	17790.7	18.6333	1.04	9	58.58	8556.33	-1.66667	0.353333	16061.2	0.745	6.96667	3860.2	8	39.52	2	37.6035
Mo Yu 8	1114	0.602	10.2167	9.98333	27.2025	972.425	28	-8.7	36.7	20.2667	-2.35	21.9	-2.35	556	111	4	84.8882	309	15	280	15	63	54.37	14555.7	5.2	0.493333	225	60.47	20782	20.2333	1.48	243	72.4	15262.3	16.1667	1.39667	25	58.59	9532.33	-0.866667	0.346667	15033.1	0.929167	5.2	3757.6	8	35.57	7	38.8792
Nan Shan 1	1704	0.113	-3.2875	11.6917	27.5747	1085.38	17.7	-24.7	42.4	9.45	-8.81667	9.45	-17.4	44	9	0	85.7197	22	3	22	4	6	40.94	13900.7	-9.46667	0.12	21	41.36	21141.3	7.06667	0.326667	14	46.89	16112.3	5.23333	0.306667	3	52.52	8482.33	-14.4333	0.0666667	14909.2	0.205	-9.46667	4583.8	1	36.99	2	37.7
Tie 4-1	1327	0.102	11.6542	12.7583	29.3971	1116.27	32	-11.4	43.4	19.1167	4.43333	24.15	-3.41667	73	12	2	47.2589	27	8	24	11	19	45.95	14437.3	6.96667	0.49	27	42.65	23460.3	22.5333	1.09667	18	49.12	17790.7	18.6333	1.04	9	58.58	8556.33	-1.66667	0.353333	16061.2	0.745	6.96667	3860.2	8	39.52	2	36.3214
Tugou 1	1327	0.102	11.6542	12.7583	29.3971	1116.27	32	-11.4	43.4	19.1167	4.43333	24.15	-3.41667	73	12	2	47.2589	27	8	24	11	19	45.95	14437.3	6.96667	0.49	27	42.65	23460.3	22.5333	1.09667	18	49.12	17790.7	18.6333	1.04	9	58.58	8556.33	-1.66667	0.353333	16061.2	0.745	6.96667	3860.2	8	39.52	2	37.7
Tu-2	1704	0.113	-3.2875	11.6917	27.5747	1085.38	17.7	-24.7	42.4	9.45	-8.81667	9.45	-17.4	44	9	0	85.7197	22	3	22	4	6	40.94	13900.7	-9.46667	0.12	21	41.36	21141.3	7.06667	0.326667	14	46.89	16112.3	5.23333	0.306667	3	52.52	8482.33	-14.4333	0.0666667	14909.2	0.205	-9.46667	4583.8	1	36.99	2	36.3214
Xijiao 2	1345	0.074	7.86667	14.0833	30.9524	1173.27	29.6	-15.9	45.5	21.5667	-7.36667	21.5667	-7.36667	75	19	1	105.058	48	3	48	3	6	36.77	16632.3	2.03333	0.226667	37	40.31	23624.7	19.7	0.88	28	46.59	18323.7	15.4	0.72	4	50.88	9605.33	-5.73333	0.176667	17046.5	0.500833	2.03333	4043.8	7	40.38	1	38.6185
Yili Xian Huang Rou	509	0.6	14.3458	10.6917	26.9992	1059.25	33.3	-6.3	39.6	25.1	0.7	27.1167	0.7	532	110	5	80.9139	285	18	263	18	65	57.38	14031.7	9	0.563333	201	64.59	20370.3	25.4667	1.66333	237	74.84	15344.7	20.7	1.56667	29	61.28	9243.67	2.1	0.4	14747.6	1.04833	9	3617.2	9	34.88	9	39.4181
Kashi Huang Rou Li Guang	1073	0.025	10.0875	16.075	33.0761	1214.34	33.5	-15.1	48.6	24.15	-1.9	24.15	-5.83333	31	9	1	102.361	20	3	20	3	4	33.87	16677.7	5.03333	0.203333	17	35.6	24186.3	22.4	0.656667	7	39.49	18745.3	17.3333	0.533333	3	48.85	9768	-4.5	0.166667	17344.3	0.39	5.03333	3979	8	40.39	1	36.4401
Huang Li Guang	1251	0.08	8.56667	14.55	31.4255	1178.66	30.6	-15.7	46.3	22.3	-5.15	22.3	-6.81667	74	18	1	101.82	46	3	46	3	6	37.06	16649.7	2.83333	0.236667	36	41.27	23648.3	20.4	0.903333	29	47.46	18295	16	0.753333	3	50.73	9602	-5.2	0.186667	17048.8	0.52	2.83333	4016.8	7	40.1	1	36.3214
Suan Li Guang	520	0.668	14.3583	10.1167	27.4164	989.056	32.7	-4.2	36.9	24.6	1.85	26.45	1.85	611	109	5	78.0693	319	19	275	19	77	60.39	13688.3	9.16667	0.65	227	67.49	19761.7	24.7333	1.73333	276	76.97	14971.3	20.3333	1.62333	31	63.79	9050	3.1	0.466667	14367.8	1.11833	9.16667	3525.4	9	34.32	10	36.4401
Tian Li Guang	509	0.6	14.3458	10.6917	26.9992	1059.25	33.3	-6.3	39.6	25.1	0.7	27.1167	0.7	532	110	5	80.9139	285	18	263	18	65	57.38	14031.7	9	0.563333	201	64.59	20370.3	25.4667	1.66333	237	74.84	15344.7	20.7	1.56667	29	61.28	9243.67	2.1	0.4	14747.6	1.04833	9	3617.2	9	34.88	9	36.4401
Hong Li Guang	1327	0.102	11.6542	12.7583	29.3971	1116.27	32	-11.4	43.4	19.1167	4.43333	24.15	-3.41667	73	12	2	47.2589	27	8	24	11	19	45.95	14437.3	6.96667	0.49	27	42.65	23460.3	22.5333	1.09667	18	49.12	17790.7	18.6333	1.04	9	58.58	8556.33	-1.66667	0.353333	16061.2	0.745	6.96667	3860.2	8	39.52	2	36.3214
Jinta You Pan Tao	1327	0.102	11.6542	12.7583	29.3971	1116.27	32	-11.4	43.4	19.1167	4.43333	24.15	-3.41667	73	12	2	47.2589	27	8	24	11	19	45.95	14437.3	6.96667	0.49	27	42.65	23460.3	22.5333	1.09667	18	49.12	17790.7	18.6333	1.04	9	58.58	8556.33	-1.66667	0.353333	16061.2	0.745	6.96667	3860.2	8	39.52	2	37.9354
Xijiao 3	1327	0.102	11.6542	12.7583	29.3971	1116.27	32	-11.4	43.4	19.1167	4.43333	24.15	-3.41667	73	12	2	47.2589	27	8	24	11	19	45.95	14437.3	6.96667	0.49	27	42.65	23460.3	22.5333	1.09667	18	49.12	17790.7	18.6333	1.04	9	58.58	8556.33	-1.66667	0.353333	16061.2	0.745	6.96667	3860.2	8	39.52	2	38.6185
Dunhuang Dong Tao	1441	0.13	7.87083	15.225	33.2424	1109.92	29.3	-16.5	45.8	20.7333	-6.73333	20.7333	-6.73333	119	28	1	99.0327	73	5	73	5	8	39.44	16495.7	2.63333	0.223333	57	46.17	23258.7	18.9333	0.833333	48	52.51	18003.7	14.9333	0.723333	6	50.28	9569.67	-5.13333	0.166667	16831.9	0.486667	2.63333	4016.8	7	39.16	1	37.5282
Gaotai 1	1441	0.13	7.87083	15.225	33.2424	1109.92	29.3	-16.5	45.8	20.7333	-6.73333	20.7333	-6.73333	119	28	1	99.0327	73	5	73	5	8	39.44	16495.7	2.63333	0.223333	57	46.17	23258.7	18.9333	0.833333	48	52.51	18003.7	14.9333	0.723333	6	50.28	9569.67	-5.13333	0.166667	16831.9	0.486667	2.63333	4016.8	7	39.16	1	37.8316
Bai Sha	1395	0.1	7.99583	15.1083	32.8442	1125.87	29.6	-16.4	46	21.05	-6.8	21.05	-6.8	107	26	1	103.392	67	3	67	3	7	39.2	16326.3	2.63333	0.226667	52	44.76	23274	19.2667	0.843333	44	51.2	18043.7	15.1333	0.726667	4	50.73	9285.67	-5.16667	0.17	16732.4	0.491667	2.63333	4016.8	7	39.34	1	38.5401
Kashi 2	1359	0.029	12.9375	12.325	29.2755	1106.05	32.7	-9.4	42.1	23.8	5.21667	25.1833	-1.96667	34	7	0	82.2	19	2	15	5	6	37.66	14835.3	9	0.416667	19	40.6	21909	23.7667	1.17	6	46.99	17497.3	19.6	1.09667	3	52.59	9694	-0.7	0.31	15983.9	0.748333	9	3784.6	9	37.12	1	36.4401
Kashi 3	1156	0.634	10.9	10.3	29.5129	889.42	28.1	-6.8	34.9	20.2333	-0.683333	21.4833	-0.683333	561	101	4	82.0227	295	14	272	14	65	59.27	13910.3	6.53333	0.576667	233	65.8	19519.3	19.9333	1.51	240	75.01	14215.3	16.4333	1.41667	23	62.75	8666	0.7	0.42	14077.8	0.980833	6.53333	3649.6	8	34.58	9	36.4401
Kashi 4	1477	0.134	7.77917	15.4417	33.7892	1093.64	29.1	-16.6	45.7	20.45	-6.63333	20.45	-6.63333	130	32	1	100.645	80	5	80	5	8	39.83	16330	2.6	0.226667	61	46.81	23063	18.6333	0.83	55	53.17	17846.3	14.7667	0.73	6	50.2	9472.67	-5	0.166667	16678	0.488333	2.6	4006	4	38.94	1	36.4401
Lin Bai 10	1477	0.134	7.77917	15.4417	33.7892	1093.64	29.1	-16.6	45.7	20.45	-6.63333	20.45	-6.63333	130	32	1	100.645	80	5	80	5	8	39.83	16330	2.6	0.226667	61	46.81	23063	18.6333	0.83	55	53.17	17846.3	14.7667	0.73	6	50.2	9472.67	-5	0.166667	16678	0.488333	2.6	4006	4	38.94	1	37.0215
Lin Bai 3	1114	0.602	10.2167	9.98333	27.2025	972.425	28	-8.7	36.7	20.2667	-2.35	21.9	-2.35	556	111	4	84.8882	309	15	280	15	63	54.37	14555.7	5.2	0.493333	225	60.47	20782	20.2333	1.48	243	72.4	15262.3	16.1667	1.39667	25	58.59	9532.33	-0.866667	0.346667	15033.1	0.929167	5.2	3757.6	8	35.57	7	37.0215
Linze Zi Tao	1477	0.134	7.77917	15.4417	33.7892	1093.64	29.1	-16.6	45.7	20.45	-6.63333	20.45	-6.63333	130	32	1	100.645	80	5	80	5	8	39.83	16330	2.6	0.226667	61	46.81	23063	18.6333	0.83	55	53.17	17846.3	14.7667	0.73	6	50.2	9472.67	-5	0.166667	16678	0.488333	2.6	4006	4	38.94	1	37.6035
Mi Yang Shan	1321	0.086	12.1542	12.875	29.6659	1115.06	32.6	-10.8	43.4	23.1333	4.96667	24.75	-2.81667	71	11	3	45.27	26	9	24	11	18	45.94	14473.3	7.33333	0.493333	26	42.45	23528.3	23.1	1.11	17	48.81	17917.3	19.1667	1.06333	10	58.32	8675	-1.1	0.36	16148.5	0.756667	7.33333	3833.2	8	39.2671	1	38.8792
Qi Tao	1114	0.602	10.2167	9.98333	27.2025	972.425	28	-8.7	36.7	20.2667	-2.35	21.9	-2.35	556	111	4	84.8882	309	15	280	15	63	54.37	14555.7	5.2	0.493333	225	60.47	20782	20.2333	1.48	243	72.4	15262.3	16.1667	1.39667	25	58.59	9532.33	-0.866667	0.346667	15033.1	0.929167	5.2	3757.6	8	35.57	7	36.4722
Zhang Bai 2	1114	0.602	10.2167	9.98333	27.2025	972.425	28	-8.7	36.7	20.2667	-2.35	21.9	-2.35	556	111	4	84.8882	309	15	280	15	63	54.37	14555.7	5.2	0.493333	225	60.47	20782	20.2333	1.48	243	72.4	15262.3	16.1667	1.39667	25	58.59	9532.33	-0.866667	0.346667	15033.1	0.929167	5.2	3757.6	8	35.57	7	36.936
Zhang Bai 5	1002	0.666	13.8917	9.83333	31.3163	771.447	29	-2.4	31.4	22.0167	3.9	23.1833	3.9	541	104	2	84.6456	285	9	271	9	62	63.64	12592.7	9.93333	0.67	239	70.06	18188.7	21.6667	1.49333	224	76.79	13452.3	18.7333	1.41	16	67.35	8181	5.06667	0.496667	13103.7	1.0175	9.93333	3417.4	8	33.39	10	36.936
Zhang Bai Gan	1327	0.102	11.6542	12.7583	29.3971	1116.27	32	-11.4	43.4	19.1167	4.43333	24.15	-3.41667	73	12	2	47.2589	27	8	24	11	19	45.95	14437.3	6.96667	0.49	27	42.65	23460.3	22.5333	1.09667	18	49.12	17790.7	18.6333	1.04	9	58.58	8556.33	-1.66667	0.353333	16061.2	0.745	6.96667	3860.2	8	39.52	2	36.936
Bi Nan I	2358	0.033	7.78333	13.25	31.1765	1075.23	28.2	-14.3	42.5	18.2167	0.583333	20.0667	-6.5	32	7	0	80.4815	17	2	14	4	6	37.34	15594	2.73333	0.42	17	39.8	22125.7	17.7333	1.16333	7	45.91	17620.7	14.2333	1.09333	2	51.12	10583.3	-5.43333	0.313333	16480.9	0.7475	2.73333	4038.4	8	36.5725	1	36.3345
Bai Gen Gansu Tao	1704	0.113	-3.2875	11.6917	27.5747	1085.38	17.7	-24.7	42.4	9.45	-8.81667	9.45	-17.4	44	9	0	85.7197	22	3	22	4	6	40.94	13900.7	-9.46667	0.12	21	41.36	21141.3	7.06667	0.326667	14	46.89	16112.3	5.23333	0.306667	3	52.52	8482.33	-14.4333	0.0666667	14909.2	0.205	-9.46667	4583.8	1	36.99	2	37.7
Hong Gen Gansu Tao	1327	0.102	11.6542	12.7583	29.3971	1116.27	32	-11.4	43.4	19.1167	4.43333	24.15	-3.41667	73	12	2	47.2589	27	8	24	11	19	45.95	14437.3	6.96667	0.49	27	42.65	23460.3	22.5333	1.09667	18	49.12	17790.7	18.6333	1.04	9	58.58	8556.33	-1.66667	0.353333	16061.2	0.745	6.96667	3860.2	8	39.52	2	37.7
Shan Gan Shan Tao	1345	0.074	7.86667	14.0833	30.9524	1173.27	29.6	-15.9	45.5	21.5667	-7.36667	21.5667	-7.36667	75	19	1	105.058	48	3	48	3	6	36.77	16632.3	2.03333	0.226667	37	40.31	23624.7	19.7	0.88	28	46.59	18323.7	15.4	0.72	4	50.88	9605.33	-5.73333	0.176667	17046.5	0.500833	2.03333	4043.8	7	40.38	1	35.1067
Li He Tian Ren	1114	0.602	10.2167	9.98333	27.2025	972.425	28	-8.7	36.7	20.2667	-2.35	21.9	-2.35	556	111	4	84.8882	309	15	280	15	63	54.37	14555.7	5.2	0.493333	225	60.47	20782	20.2333	1.48	243	72.4	15262.3	16.1667	1.39667	25	58.59	9532.33	-0.866667	0.346667	15033.1	0.929167	5.2	3757.6	8	35.57	7	36.4401
Xinjiang Pan Tao	1269	0.102	8.71667	14	31.1804	1153.4	30.1	-14.8	44.9	22.0833	1.08333	22.0833	-6.33333	79	18	1	92.3869	47	5	47	5	9	37.15	16050.3	3.06667	0.24	38	41.63	23543	20.2667	0.926667	27	47.17	18225.3	16.1333	0.756667	5	50.58	9074.67	-4.73333	0.186667	16723.3	0.5275	3.06667	3984.4	7	39.9894	1	38.4256
Tian Ren Tao	1269	0.102	8.71667	14	31.1804	1153.4	30.1	-14.8	44.9	22.0833	1.08333	22.0833	-6.33333	79	18	1	92.3869	47	5	47	5	9	37.15	16050.3	3.06667	0.24	38	41.63	23543	20.2667	0.926667	27	47.17	18225.3	16.1333	0.756667	5	50.58	9074.67	-4.73333	0.186667	16723.3	0.5275	3.06667	3984.4	7	39.9894	1	36.3214
Kashi 1	1165	0.028	9.72083	16.0917	33.5943	1189.1	32.9	-15	47.9	23.5167	-2.05	23.5167	-5.86667	37	11	1	104.827	24	3	24	3	4	33.83	16236.7	4.66667	0.196667	21	35.6	24038.3	21.7667	0.666667	9	39.17	18679.7	16.8333	0.533333	3	47.98	9168.67	-4.5	0.163333	17030.8	0.39	4.66667	3973.6	8	40.1069	1	36.4401
Rou Pan Tao	1270	0.102	8.74583	14.0417	31.2037	1154.93	30.2	-14.8	45	22.1333	1.13333	22.1333	-6.35	79	18	1	92.3869	47	5	47	5	9	37.15	16042.7	3.06667	0.24	38	41.63	23514	20.3667	0.926667	27	47.17	18205.7	16.1	0.76	5	50.58	9011.33	-4.7	0.186667	16693.4	0.528333	3.06667	3984.4	7	39.969	1	37.9354
Longsheng Pan Tao	1539	0.119	7.87917	13.2917	30.7677	1125.41	28.5	-14.7	43.2	20.9167	0.45	20.9167	-6.78333	92	21	1	93.9482	55	5	55	5	11	37.37	16380.7	2.3	0.22	45	41.87	23431.7	19.1	0.873333	31	46.97	18161	15.2667	0.703333	5	50.48	9584.33	-5.26667	0.173333	16889.4	0.4925	2.3	4006	6	39.7803	1	37.4257
Longsheng Da Wan Tao	1539	0.119	7.87917	13.2917	30.7677	1125.41	28.5	-14.7	43.2	20.9167	0.45	20.9167	-6.78333	92	21	1	93.9482	55	5	55	5	11	37.37	16380.7	2.3	0.22	45	41.87	23431.7	19.1	0.873333	31	46.97	18161	15.2667	0.703333	5	50.48	9584.33	-5.26667	0.173333	16889.4	0.4925	2.3	4006	6	39.7803	1	37.4257
Dujiadun Wan Ge Da Tao	1158	0.028	9.74167	16.0833	33.5769	1189.16	32.9	-15	47.9	23.5333	-2.03333	23.5333	-5.86667	37	11	1	104.827	24	3	24	3	4	33.83	16688.7	4.73333	0.196667	21	35.6	24152.7	21.7667	0.666667	9	39.17	18769.7	16.8333	0.536667	3	47.98	9586.33	-4.46667	0.163333	17299.3	0.390833	4.73333	3973.6	8	40.094	1	37.1665
Tayuan Nian He Tao	1158	0.028	9.74167	16.0833	33.5769	1189.16	32.9	-15	47.9	23.5333	-2.03333	23.5333	-5.86667	37	11	1	104.827	24	3	24	3	4	33.83	16688.7	4.73333	0.196667	21	35.6	24152.7	21.7667	0.666667	9	39.17	18769.7	16.8333	0.536667	3	47.98	9586.33	-4.46667	0.163333	17299.3	0.390833	4.73333	3973.6	8	40.094	1	37.4257
Dingjiaba Qing Pi Tao	1503	0.043	8.18333	15.4667	32.493	1207.82	31.2	-16.4	47.6	22.2833	-0.316667	22.2833	-7.51667	52	13	1	93.0044	31	3	31	4	8	34.51	16398.3	2.86667	0.183333	28	36.35	23878.7	20.4333	0.65	13	40.79	18587.7	15.5667	0.516667	3	49.06	9177	-6.2	0.153333	17010.4	0.375833	2.86667	4054.6	8	40.0887	1	37.2706
Dingjiaba Hong Li Guang Tao	1269	0.102	8.71667	14	31.1804	1153.4	30.1	-14.8	44.9	22.0833	1.08333	22.0833	-6.33333	79	18	1	92.3869	47	5	47	5	9	37.15	16050.3	3.06667	0.24	38	41.63	23543	20.2667	0.926667	27	47.17	18225.3	16.1333	0.756667	5	50.58	9074.67	-4.73333	0.186667	16723.3	0.5275	3.06667	3984.4	7	39.9894	1	37.2706
Yueya Wan Ge Da Tao	1114	0.602	10.2167	9.98333	27.2025	972.425	28	-8.7	36.7	20.2667	-2.35	21.9	-2.35	556	111	4	84.8882	309	15	280	15	63	54.37	14555.7	5.2	0.493333	225	60.47	20782	20.2333	1.48	243	72.4	15262.3	16.1667	1.39667	25	58.59	9532.33	-0.866667	0.346667	15033.1	0.929167	5.2	3757.6	8	35.57	7	37.1665
Yueya Hong Li Guang	1269	0.102	8.71667	14	31.1804	1153.4	30.1	-14.8	44.9	22.0833	1.08333	22.0833	-6.33333	79	18	1	92.3869	47	5	47	5	9	37.15	16050.3	3.06667	0.24	38	41.63	23543	20.2667	0.926667	27	47.17	18225.3	16.1333	0.756667	5	50.58	9074.67	-4.73333	0.186667	16723.3	0.5275	3.06667	3984.4	7	39.9895	1	37.1665
Damiao Qing Pi Tao	1269	0.102	8.71667	14	31.1804	1153.4	30.1	-14.8	44.9	22.0833	1.08333	22.0833	-6.33333	79	18	1	92.3869	47	5	47	5	9	37.15	16050.3	3.06667	0.24	38	41.63	23543	20.2667	0.926667	27	47.17	18225.3	16.1333	0.756667	5	50.58	9074.67	-4.73333	0.186667	16723.3	0.5275	3.06667	3984.4	7	39.9894	1	37.2709
Hongguang Wan Li Guang Tao	1597	0.119	7.60417	13.3583	30.9221	1119.57	28.2	-15	43.2	20.5667	0.2	20.5667	-7	95	22	1	96.1175	58	5	58	5	11	37.37	16173	2.1	0.216667	47	41.87	23258.7	18.7667	0.856667	32	46.97	18137.7	14.9667	0.69	5	50.48	9296	-5.46667	0.17	16716.3	0.483333	2.1	4016.8	6	39.6769	1	37.4257
Huangguang Da Li Guang Tao	1189	0.028	9.51667	16.1	33.682	1185.44	32.6	-15.2	47.8	23.2833	-2.21667	23.2833	-6.01667	37	11	1	104.827	24	3	24	3	4	33.83	16569	4.46667	0.196667	21	35.6	24096	21.5333	0.656667	9	39.17	18682.7	16.6333	0.526667	3	47.98	9484.33	-4.66667	0.16	17208	0.385	4.46667	3984.4	8	40.0798	1	37.4257
Longsheng Xin Jiang Tao	1158	0.028	9.74167	16.0833	33.5769	1189.16	32.9	-15	47.9	23.5333	-2.03333	23.5333	-5.86667	37	11	1	104.827	24	3	24	3	4	33.83	16688.7	4.73333	0.196667	21	35.6	24152.7	21.7667	0.666667	9	39.17	18769.7	16.8333	0.536667	3	47.98	9586.33	-4.46667	0.163333	17299.3	0.390833	4.73333	3973.6	8	40.094	1	37.4257
Xidong Xiao Li Guang Tao	1364	0.096	11.6083	12.7167	29.3687	1113.96	32	-11.3	43.3	22.5333	4.43333	24.1	-3.41667	78	13	2	49.7438	29	8	26	11	20	45.99	14397	6.86667	0.483333	29	42.54	23442	22.5	1.08667	20	48.91	17796.3	18.6333	1.02667	9	58.39	8498.33	-1.63333	0.35	16033.4	0.736667	6.86667	3860.2	8	39.4645	1	37.2706
Qinjiawan Zao Tao	1122	0.032	11.8875	14.4583	31.363	1174.59	33	-13.1	46.1	24.9	-2.5	24.9	-3.9	38	9	0	99.71	23	0	23	1	4	44.83	14837	7.6	0.386667	21	44.02	22634	23.5333	1.06	13	50.84	17542	18.9	0.986667	0	61.23	8901	-2.53333	0.283333	15978.5	0.679167	7.6	3887.2	9	39.4647	1	37.1665
Yueya Da Ye Hong Li Guang	1364	0.096	11.6083	12.7167	29.3687	1113.96	32	-11.3	43.3	22.5333	4.43333	24.1	-3.41667	78	13	2	49.7438	29	8	26	11	20	45.99	14397	6.86667	0.483333	29	42.54	23442	22.5	1.08667	20	48.91	17796.3	18.6333	1.02667	9	58.39	8498.33	-1.63333	0.35	16033.4	0.736667	6.86667	3860.2	8	39.4645	1	37.1665
Langanxiang 1	1267	0.042	12.1958	13.7917	31.0623	1117.38	33.2	-11.2	44.4	23.3	-1.36667	24.7333	-2.8	42	9	1	76.5683	21	3	18	4	8	43.43	14562	7.93333	0.48	21	42.54	22918.7	23.3	1.17333	10	49.08	17624.7	18.8667	1.14333	3	57.49	9050.33	-1.36667	0.356667	16038.9	0.788333	7.93333	3827.8	9	38.2155	1	36.2696
Langanxiang 2	1328	0.044	12.0917	13.7167	31.1036	1110.14	33	-11.1	44.1	23.0833	-1.33333	24.5833	-2.8	42	9	1	72.588	20	3	17	4	9	43.26	14481.3	7.73333	0.48	20	42.55	22834.3	23.0333	1.16	10	48.95	17609	18.8333	1.13	3	57.05	8926.33	-1.36667	0.35	15962.8	0.78	7.73333	3827.8	9	38.1323	1	39.5809
Langanxiang 3	1114	0.602	10.2167	9.98333	27.2025	972.425	28	-8.7	36.7	20.2667	-2.35	21.9	-2.35	556	111	4	84.8882	309	15	280	15	63	54.37	14555.7	5.2	0.493333	225	60.47	20782	20.2333	1.48	243	72.4	15262.3	16.1667	1.39667	25	58.59	9532.33	-0.866667	0.346667	15033.1	0.929167	5.2	3757.6	8	35.57	7	36.2696
Zepu 4	1251	0.037	12.3667	13.9333	31.1708	1135.44	33.3	-11.4	44.7	23.6333	-1.51667	24.9833	-2.93333	44	9	0	76.5523	23	2	19	5	8	42.12	14824.7	8.23333	0.453333	23	41.8	22735.7	23.6	1.16667	11	48.34	17660.3	19.1	1.12667	2	56.34	9217.33	-1.56667	0.333333	16109.5	0.77	8.23333	3833.2	9	38.1325	1	38.129
Zepu 6	1090	0.057	10.575	14.5833	31.772	1155.64	31.6	-14.3	45.9	23.45	-3.28333	23.45	-4.91667	63	15	1	89.7556	35	4	35	5	7	50.46	14386.3	5.83333	0.4	30	46.45	22893.3	22.0333	1.07333	22	52.7	17353.7	17.6667	0.996667	4	65.28	8243.33	-3.33333	0.283333	15719.2	0.688333	5.83333	3935.8	8	41.0797	2	37.9286
Zepu 8	1090	0.057	10.575	14.5833	31.772	1155.64	31.6	-14.3	45.9	23.45	-3.28333	23.45	-4.91667	63	15	1	89.7556	35	4	35	5	7	50.46	14386.3	5.83333	0.4	30	46.45	22893.3	22.0333	1.07333	22	52.7	17353.7	17.6667	0.996667	4	65.28	8243.33	-3.33333	0.283333	15719.2	0.688333	5.83333	3935.8	8	41.0798	2	38.2934
Tupulukexiang 1	1563	0.634	9.77917	9.94167	29.3265	866.09	26.5	-7.4	33.9	18.9167	-1.48333	20.1167	-1.48333	594	110	3	83.1189	312	14	291	14	68	59.27	13772.3	5.4	0.53	251	65.8	19363.3	18.6	1.4	254	75.01	14029	15.1667	1.31	21	62.75	8787.67	-0.1	0.38	13988.1	0.905	5.4	3692.8	8	34.5188	9	39.6087
Tupulukexiang 3	728	0.964	12.9167	9.36667	26.9933	930.897	30.2	-4.5	34.7	22.7167	1.13333	24.3333	1.13333	701	128	5	78.6684	369	20	314	20	90	62.07	13539	7.93333	0.656667	266	69.11	19714	22.6333	1.70333	310	77.89	14681	18.7333	1.58667	35	65.89	8973.67	2.5	0.476667	14226.9	1.10583	7.93333	3557.8	8	34.15	10	39.6087
Ping Ding Qiu Tao	458	0.688	14.4958	10.0417	27.5114	978.269	32.6	-3.9	36.5	24.6667	2.11667	26.45	2.11667	621	112	5	78.8087	326	18	280	18	78	60.39	13559.7	9.3	0.666667	233	67.31	19771.3	24.7	1.77333	280	76.81	14801	20.5	1.66	30	63.78	8836.33	3.3	0.486667	14242.1	1.14667	9.3	3514.6	9	34.2611	10	36.4722
Qingling Dong Tao	1269	0.102	8.71667	14	31.1804	1153.4	30.1	-14.8	44.9	22.0833	1.08333	22.0833	-6.33333	79	18	1	92.3869	47	5	47	5	9	37.15	16632.3	2.03333	0.226667	38	41.63	23624.7	19.7	0.88	27	47.17	18323.7	15.4	0.72	5	50.58	9605.33	-5.73333	0.176667	17046.5	0.500833	2.03333	4043.8	7	39.9859	1	38.4419
Tai Bai	1118	0.586	10.4875	9.99167	27.2252	971.003	28.3	-8.4	36.7	20.5167	-2.05	22.1667	-2.05	557	111	4	84.537	309	15	278	15	64	54.37	14555.7	5.2	0.493333	224	60.47	20782	20.2333	1.48	244	72.4	15262.3	16.1667	1.39667	25	58.59	9532.33	-0.866667	0.346667	15033.1	0.929167	5.2	3757.6	8	35.5022	7	38.4247
Jinta Hong Guang	1201	0.602	10.5875	10.1583	27.455	978.034	28.5	-8.5	37	20.6833	-2.06667	22.3167	-2.06667	545	109	4	84.7399	303	15	274	15	62	53.54	NA	5.2	NA	220	60.13	NA	20.2333	NA	238	72.13	NA	16.1667	NA	25	57.98	NA	-0.866667	NA	NA	NA	5.2	3757.6	8	35.6125	7	37.9354
Jiangcun 1	1359	0.029	12.9375	12.325	29.2755	1106.05	32.7	-9.4	42.1	23.8	5.21667	25.1833	-1.96667	34	7	0	82.2	19	2	15	5	6	37.66	14835.3	9	0.416667	19	40.6	21909	23.7667	1.17	6	46.99	17497.3	19.6	1.09667	3	52.59	9694	-0.7	0.31	15983.9	0.748333	9	3784.6	9	37.12	1	36.899
Xizhuang 1	1704	0.113	-3.2875	11.6917	27.5747	1085.38	17.7	-24.7	42.4	9.45	-8.81667	9.45	-17.4	44	9	0	85.7197	22	3	22	4	6	40.94	13900.7	-9.46667	0.12	21	41.36	21141.3	7.06667	0.326667	14	46.89	16112.3	5.23333	0.306667	3	52.52	8482.33	-14.4333	0.0666667	14909.2	0.205	-9.46667	4583.8	1	36.99	2	37.2351
Qingzhou Hong Pi Mi Tao	111	0.529	12.8542	12.4917	30.4675	1083.26	32.2	-8.8	41	25.5333	-1.36667	25.5333	-1.36667	671	217	8	114.093	432	28	432	28	62	57.5	15701.3	6.23333	0.516667	323	69.65	21524.7	23.6667	1.87	246	72.19	16606.7	20.3	1.70333	40	61.98	9474.33	1.1	0.4	15826.8	1.1225	6.23333	3709	9	36.68	6	38.8684
Taiyuan Shui Mi	96	0.744	14.3125	10.4417	28.4514	1020.57	31.9	-4.8	36.7	26.5833	1.18333	26.5833	1.18333	746	214	11	100.188	459	41	459	41	77	61.58	15622.3	8	0.643333	371	71.46	21373.3	24.4333	2.02333	247	75.63	17062.3	21.4	1.85333	51	65.44	9974.33	3.4	0.483333	16008.1	1.25083	8	3552.4	9	34.8	8	36.899
Shenzhou Bai Mi	78	0.485	13.2167	11.65	28.9082	1090.02	32.1	-8.2	40.3	26.0167	-0.916667	26.0167	-0.916667	503	149	3	119.304	343	14	343	14	35	49.15	15487.3	7.3	0.51	227	61.01	22158	24.4667	1.86	220	69.03	16492.3	20.0333	1.69	21	56.58	8801.33	0.9	0.37	15734.8	1.1075	7.3	3692.8	9	38.05	5	39.9761
Shenzhou Li He Shui Mi	54	0.687	14.6333	10.6333	29.537	975.023	32	-4	36	26.4833	2.16667	26.4833	2.16667	739	188	14	83.3109	392	49	392	49	103	66.01	14337.3	8.7	0.75	328	72.42	20516	24.5	2.14667	250	77.34	16112.7	21.1	1.94333	58	68.1	9372.67	4.16667	0.53	15084.7	1.3425	8.7	3509.2	9	33.79	9	39.9761
Er Jie Bai	52	0.731	14.7917	10.4333	29.225	971.592	32	-3.7	35.7	26.6167	2.38333	26.6167	2.38333	742	182	16	79.4979	386	57	386	57	109	66.02	14153.3	8.8	0.766667	325	72.43	20155.3	24.6	2.17333	246	77.29	15898.3	21.2667	1.96	62	68.13	9040.67	4.33333	0.54	14811.9	1.36	8.8	3498.4	9	33.62	10	41.1519
Feicheng Bai Li 17	699	0.536	10.1833	12.7833	31.1789	1068.44	29.1	-11.9	41	21.0167	-3.66667	22.7667	-3.66667	474	139	3	117.45	320	13	314	13	35	49.63	16034	4.7	0.39	221	60.6	22296.3	21.4	1.48	199	69.78	16631	16.7333	1.35667	19	57.33	10115	-2.1	0.276667	16269.1	0.875833	4.7	3849.4	8	37.87	6	39.4269
Han Lu Mi	92	0.73	14.8792	10.775	29.8476	970.68	32.2	-3.9	36.1	26.6667	2.46667	26.6667	2.46667	749	168	13	78.8841	391	45	391	45	103	65.29	13827.3	8.96667	0.756667	320	71.57	19799	24.7333	2.11	269	76.66	15529.7	21.3	1.89667	57	66	8979.67	4.4	0.523333	14533.9	1.32167	8.96667	3482.2	9	33.55	9	37.6585
Hong Tao	54	0.687	14.6333	10.6333	29.537	975.023	32	-4	36	26.4833	2.16667	26.4833	2.16667	739	188	14	83.3109	392	49	392	49	103	66.01	14344	8.7	0.75	328	72.42	20506.7	24.5	2.14667	250	77.34	16111.7	21.1	1.94333	58	68.1	9377	4.16667	0.53	15084.8	1.3425	8.7	3509.2	9	33.79	9	39.5701
Ji Zui Bai	70	0.476	12.1375	12.625	29.5667	1160.07	32.2	-10.5	42.7	25.7	-3	25.7	-3	476	163	3	137.878	366	11	366	11	21	48.39	15421	5.93333	0.46	257	60.79	22026	24.0667	1.79	181	67.92	16426	19.6	1.61	17	56.22	8811.67	-0.966667	0.333333	15671.2	1.04833	5.93333	3806.2	9	38.97	5	41.0246
Licheng Tao	547	0.617	12.1375	10.6917	28.136	1019.03	30	-8	38	22.7667	-1.01667	24.4833	-1.01667	528	113	7	81.8526	285	21	266	21	64	57.2	14251.7	6.76667	0.53	220	65.44	20717.7	22.6	1.63667	213	74.06	15548	18.6333	1.51	31	60.04	9033.33	0.633333	0.37	14887.7	1.01167	6.76667	3687.4	9	34.99	8	39.0444
Liu Yue Bai	12	0.576	11.2167	11.0667	27.0579	1138.02	30.1	-10.8	40.9	24.6333	-3.63333	24.6333	-3.63333	638	206	4	128.881	458	12	458	12	38	51.09	15496.3	4.2	0.406667	328	66.9	21893.7	22.3	1.76667	253	68.79	16641.7	19.2667	1.58	19	55.56	8648.33	-1.03333	0.303333	15670	1.01417	4.2	3838.6	8	39.64	5	38.8813
Liu Yue Kong	1224	0.517	8.11667	13.3167	30.8971	1093.71	28.1	-15	43.1	19.3167	-6.11667	21	-6.11667	434	118	3	107.501	277	12	271	12	38	48.08	NA	4.7	NA	198	58.1	NA	21.4	NA	180	68.64	NA	16.7333	NA	18	56	NA	-2.1	NA	NA	NA	4.7	3849.4	8	37.8693	6	41.086
Xiao Bai Tao	12	0.576	11.2167	11.0667	27.0579	1138.02	30.1	-10.8	40.9	24.6333	-3.63333	24.6333	-3.63333	638	206	4	128.881	458	12	458	12	38	51.09	15496.3	4.2	0.406667	328	66.9	21893.7	22.3	1.76667	253	68.79	16641.7	19.2667	1.58	19	55.56	8648.33	-1.03333	0.303333	15670	1.01417	4.2	3838.6	8	39.64	5	41.0585
Yangquan Rou Tao	239	0.583	13.4	10.5	27.9255	1046.68	31.3	-6.3	37.6	25.8	-0.2	25.8	-0.2	673	206	7	112.284	441	25	441	25	55	57.46	15859	7.23333	0.573333	331	68.7	22214.3	24.0333	1.92	251	74.53	17083.3	20.4	1.73	36	63.48	9849.67	1.96667	0.413333	16251.6	1.15917	7.23333	3633.4	9	36.11	6	37.8893
Yexian Dong Tao	25	0.498	14.4167	10.0167	26.5694	1063.84	32.2	-5.5	37.7	26.85	0.516667	26.85	0.516667	532	175	6	123.795	371	19	371	19	36	56.37	16106.7	8.26667	0.59	268	67.58	22541	25.2333	2.00667	201	73.08	17198	21.3667	1.82	27	62.36	9842.67	2.7	0.426667	16422.1	1.21083	8.26667	3606.4	9	36.72	6	41.0725
Wu Yue Bai	111	0.529	12.8542	12.4917	30.4675	1083.26	32.2	-8.8	41	25.5333	-1.36667	25.5333	-1.36667	671	217	8	114.093	432	28	432	28	62	57.5	15701.3	6.23333	0.516667	323	69.65	21524.7	23.6667	1.87	246	72.19	16606.7	20.3	1.70333	40	61.98	9474.33	1.1	0.4	15826.8	1.1225	6.23333	3709	9	36.68	6	41.086
Da Xue Tao	52	0.445	12.0958	11.175	27.7295	1115.86	31	-9.3	40.3	25.1833	-2.35	25.1833	-2.35	606	193	3	137.136	457	12	457	12	35	46.48	14649.3	5.86667	0.413333	299	60.85	20718.7	23.4333	1.77	258	66.99	15422.3	19.3333	1.56667	14	54.28	7786.33	-0.366667	0.296667	14644.2	1.01167	5.86667	3763	8	39.93	5	38.8989
Da Hong Tao	52	0.445	12.0958	11.175	27.7295	1115.86	31	-9.3	40.3	25.1833	-2.35	25.1833	-2.35	606	193	3	137.136	457	12	457	12	35	46.48	14649.3	5.86667	0.413333	299	60.85	20718.7	23.4333	1.77	258	66.99	15422.3	19.3333	1.56667	14	54.28	7786.33	-0.366667	0.296667	14644.2	1.01167	5.86667	3763	8	39.93	5	38.9842
Hong Ya Zui	52	0.445	12.0958	11.175	27.7295	1115.86	31	-9.3	40.3	25.1833	-2.35	25.1833	-2.35	606	193	3	137.136	457	12	457	12	35	46.48	14649.3	5.86667	0.413333	299	60.85	20718.7	23.4333	1.77	258	66.99	15422.3	19.3333	1.56667	14	54.28	7786.33	-0.366667	0.296667	14644.2	1.01167	5.86667	3763	8	39.93	5	39.7047
Ge Gu	25	0.468	13.0125	11.2917	27.3406	1143.74	32.3	-9	41.3	26.5333	-1.68333	26.5333	-1.68333	424	135	4	128.536	310	14	310	14	27	50.83	15894.3	6.8	0.533333	215	63.18	22634.7	24.7667	1.91333	164	70.4	16925	20.4	1.73667	18	57.99	9273	0	0.39	16181.8	1.14333	6.8	3752.2	9	37.96	5	39.7047
Feicheng Hong Li 6	142	0.52	14.3	11.6333	30.6948	998.934	32.2	-5.7	37.9	24.6833	1.4	26.2667	1.4	581	140	7	85.8458	322	24	309	24	70	57.51	14639.7	8.56667	0.61	249	65.78	20908.3	24.6	1.91333	224	73.62	15772	20.7333	1.75	38	60.52	9395.33	3.33333	0.416667	15178.8	1.1725	8.56667	3547	9	35.1333	7	39.4269
Shandong Si Yue Ban	24	0.468	13.0583	11.2833	27.3867	1142.19	32.3	-8.9	41.2	26.5333	-1.65	26.5333	-1.65	435	138	4	128.059	316	15	316	15	29	50.83	15955.7	6.8	0.54	218	63.18	22725.7	24.8333	1.92	169	70.4	16915	20.4	1.74667	19	57.99	9304.33	0.133333	0.393333	16225.2	1.15	6.8	3746.8	9	37.84	5	39.7179
Qingzhou Bai Pi Mi Tao	145	0.52	13.6542	11.525	30.5703	994.161	31.4	-6.3	37.7	24	0.8	25.55	0.8	598	143	7	84.8689	329	26	316	26	72	57.51	14609	7.96667	0.61	257	65.78	20937.7	23.8333	1.90333	229	73.62	15731	20.1	1.74333	40	60.52	9333.33	2.7	0.416667	15152.8	1.16833	7.96667	3579.4	9	35.1333	7	38.8684
Feicheng Bai Li 10	61	0.438	12.2375	11.2417	27.7572	1116.27	31.4	-9.1	40.5	25.3667	-2.2	25.3667	-2.2	633	228	4	143.417	489	13	489	13	30	47.24	15072.3	6	0.41	337	60.42	20952.3	23.5667	1.75333	250	66.96	15645	19.4667	1.55	16	55.78	8473.67	-0.2	0.293333	15035.8	1.00167	6	3752.2	8	39.95	5	40.1688
Shi Wo Shui Mi	56	0.438	12.2458	11.175	27.7295	1113.8	31.3	-9	40.3	25.3333	-2.13333	25.3333	-2.13333	623	213	3	141.029	478	11	478	11	32	47.24	15142.7	7	0.54	322	60.42	21460	23.2667	1.73667	255	66.96	16159.3	18.6333	1.60667	14	55.78	9687.67	0.9	0.373333	15612.4	1.06417	7	3692.8	8	39.94	5	40.1688
Wu yue Xian	56	0.438	12.2458	11.175	27.7295	1113.8	31.3	-9	40.3	25.3333	-2.13333	25.3333	-2.13333	623	213	3	141.029	478	11	478	11	32	47.24	15142.7	7	0.54	322	60.42	21460	23.2667	1.73667	255	66.96	16159.3	18.6333	1.60667	14	55.78	9687.67	0.9	0.373333	15612.4	1.06417	7	3692.8	8	39.94	5	40.1688
Shenzhou Shui Mi	56	0.438	12.2458	11.175	27.7295	1113.8	31.3	-9	40.3	25.3333	-2.13333	25.3333	-2.13333	623	213	3	141.029	478	11	478	11	32	47.24	15142.7	7	0.54	322	60.42	21460	23.2667	1.73667	255	66.96	16159.3	18.6333	1.60667	14	55.78	9687.67	0.9	0.373333	15612.4	1.06417	7	3692.8	8	39.94	5	39.9761
Bai Hua Shan Tao	56	0.438	12.2458	11.175	27.7295	1113.8	31.3	-9	40.3	25.3333	-2.13333	25.3333	-2.13333	623	213	3	141.029	478	11	478	11	32	47.24	15142.7	7	0.54	322	60.42	21460	23.2667	1.73667	255	66.96	16159.3	18.6333	1.60667	14	55.78	9687.67	0.9	0.373333	15612.4	1.06417	7	3692.8	8	39.94	5	40.555
Zhou Xing Shan Tao	56	0.438	12.2458	11.175	27.7295	1113.8	31.3	-9	40.3	25.3333	-2.13333	25.3333	-2.13333	623	213	3	141.029	478	11	478	11	32	47.24	15142.7	7	0.54	322	60.42	21460	23.2667	1.73667	255	66.96	16159.3	18.6333	1.60667	14	55.78	9687.67	0.9	0.373333	15612.4	1.06417	7	3692.8	8	39.94	5	40.555
Bai Hua Shan Bi Tao	56	0.438	12.2458	11.175	27.7295	1113.8	31.3	-9	40.3	25.3333	-2.13333	25.3333	-2.13333	623	213	3	141.029	478	11	478	11	32	47.24	15142.7	7	0.54	322	60.42	21460	23.2667	1.73667	255	66.96	16159.3	18.6333	1.60667	14	55.78	9687.67	0.9	0.373333	15612.4	1.06417	7	3692.8	8	39.94	5	39.6744
Ju Hua Tao	56	0.438	12.2458	11.175	27.7295	1113.8	31.3	-9	40.3	25.3333	-2.13333	25.3333	-2.13333	623	213	3	141.029	478	11	478	11	32	47.24	15142.7	7	0.54	322	60.42	21460	23.2667	1.73667	255	66.96	16159.3	18.6333	1.60667	14	55.78	9687.67	0.9	0.373333	15612.4	1.06417	7	3692.8	8	39.94	5	40.402
Sa Hong Tao	25	0.468	13.0125	11.2917	27.3406	1143.74	32.3	-9	41.3	26.5333	-1.68333	26.5333	-1.68333	424	135	4	128.536	310	14	310	14	27	50.83	15894.3	6.8	0.533333	215	63.18	22634.7	24.7667	1.91333	164	70.4	16925	20.4	1.73667	18	57.99	9273	0	0.39	16181.8	1.14333	6.8	3752.2	9	37.96	5	40.402
Hong Shou Xing	56	0.438	12.2458	11.175	27.7295	1113.8	31.3	-9	40.3	25.3333	-2.13333	25.3333	-2.13333	623	213	3	141.029	478	11	478	11	32	47.24	15142.7	7	0.54	322	60.42	21460	23.2667	1.73667	255	66.96	16159.3	18.6333	1.60667	14	55.78	9687.67	0.9	0.373333	15612.4	1.06417	7	3692.8	8	39.94	5	40.402
Hong Hua Bi Tao	56	0.438	12.2458	11.175	27.7295	1113.8	31.3	-9	40.3	25.3333	-2.13333	25.3333	-2.13333	623	213	3	141.029	478	11	478	11	32	47.24	15142.7	7	0.54	322	60.42	21460	23.2667	1.73667	255	66.96	16159.3	18.6333	1.60667	14	55.78	9687.67	0.9	0.373333	15612.4	1.06417	7	3692.8	8	39.94	5	40.402
Hong Ye Tao	56	0.438	12.2458	11.175	27.7295	1113.8	31.3	-9	40.3	25.3333	-2.13333	25.3333	-2.13333	623	213	3	141.029	478	11	478	11	32	47.24	15142.7	7	0.54	322	60.42	21460	23.2667	1.73667	255	66.96	16159.3	18.6333	1.60667	14	55.78	9687.67	0.9	0.373333	15612.4	1.06417	7	3692.8	8	39.94	5	40.402
Wu Bao Tao	121	0.658	11.15	8.21667	23.2767	1036.72	27.9	-7.4	35.3	22.8	-2.15	23.4	-2.15	695	193	9	105.28	434	29	429	29	62	60.31	16070	4	0.51	313	73.38	21319	20.8667	1.77667	276	72.31	16918.3	19.1	1.70333	44	62.65	9359.33	0.533333	0.45	15916.7	1.11	4	3746.8	8	37.19	8	40.402
Fen Shou Xing	150	0.464	12.0708	11.4917	27.9603	1132.48	31.4	-9.7	41.1	25.3333	-2.6	25.3333	-2.6	645	261	2	153.682	522	12	522	12	22	46.68	15082.7	5.86667	0.41	378	59.87	21240.7	23.7	1.73	229	66.98	15859.7	19.4	1.53667	16	55.16	8399.67	-0.6	0.296667	15145.7	0.993333	5.86667	3779.2	8	39.7	5	40.402
Hong Chui Zhi	12	0.576	11.2167	11.0667	27.0579	1138.02	30.1	-10.8	40.9	24.6333	-3.63333	24.6333	-3.63333	638	206	4	128.881	458	12	458	12	38	51.09	15496.3	4.2	0.406667	328	66.9	21893.7	22.3	1.76667	253	68.79	16641.7	19.2667	1.58	19	55.56	8648.33	-1.03333	0.303333	15670	1.01417	4.2	3838.6	8	39.64	5	40.402
Zhu Fen Chui Zhi	145	0.566	13.9958	10.575	27.9024	1052.96	32	-5.9	37.9	26.4333	0.283333	26.4333	0.283333	643	199	7	113.858	425	24	425	24	52	57.46	15865.3	7.8	0.59	317	68.7	22271.7	24.7	1.96667	240	74.53	17133.3	20.9667	1.77333	34	63.48	9816.67	2.46667	0.426667	16271.8	1.18917	7.8	3606.4	9	36.17	6	40.402
Yuan Yang Chui Zhi	96	0.744	14.3125	10.4417	28.4514	1020.57	31.9	-4.8	36.7	26.5833	1.18333	26.5833	1.18333	746	214	11	100.188	459	41	459	41	77	61.58	15622.3	8	0.643333	371	71.46	21373.3	24.4333	2.02333	247	75.63	17062.3	21.4	1.85333	51	65.44	9974.33	3.4	0.483333	16008.1	1.25083	8	3552.4	9	34.8	8	40.402
Zhong Hua Shou Tao	5	0.502	12.3583	9.9	25.3846	1128.38	30.4	-8.6	39	25.4667	-2.26667	25.4667	-2.26667	544	184	4	134.614	406	12	406	12	29	49.75	15070.7	5.76667	0.446667	284	63.62	21521.3	23.5333	1.81667	213	68.83	16157.3	20.1667	1.63333	18	56.62	8083.33	-0.1	0.326667	15208.2	1.05583	5.76667	3752.2	9	39.14	5	37.2364
Wu Yue Xian Biao Gan	7	0.572	9.92083	11.1583	27.6196	1122.59	28.8	-11.6	40.4	23.0333	-4.43333	23.0333	-4.43333	651	193	3	123.704	446	10	446	10	36	NA	15501.3	2.6	0.396667	313	NA	21694.3	20.2667	1.75	283	NA	16527	18.8	1.56	19	NA	8384.67	-2.06667	0.293333	15526.8	1	2.6	3871	8	39.95	5	39.8926
Yi Xian Hong	68	0.638	14.6875	10.8417	29.622	987.304	32.4	-4.2	36.6	26.6667	2.08333	26.6667	2.08333	723	172	12	84.0405	390	42	390	42	95	63.92	14222.7	8.63333	0.72	313	70.91	20296	24.8333	2.07	261	76.64	15782	21.1	1.88667	54	65.77	9180.33	4.03333	0.5	14870.2	1.29417	8.63333	3509.2	9	34.03	8	39.7047
Suan Tao	52	0.731	14.7917	10.4333	29.225	971.592	32	-3.7	35.7	26.6167	2.38333	26.6167	2.38333	742	182	16	79.4979	386	57	386	57	109	66.02	14153.3	8.8	0.766667	325	72.43	20155.3	24.6	2.17333	246	77.29	15898.3	21.2667	1.96	62	68.13	9040.67	4.33333	0.54	14811.9	1.36	8.8	3498.4	9	33.62	10	39.4269
Da Guo Hei Tao	239	0.583	13.4	10.5	27.9255	1046.68	31.3	-6.3	37.6	25.8	-0.2	25.8	-0.2	673	206	7	112.284	441	25	441	25	55	57.46	15859	7.23333	0.573333	331	68.7	22214.3	24.0333	1.92	251	74.53	17083.3	20.4	1.73	36	63.48	9849.67	1.96667	0.413333	16251.6	1.15917	7.23333	3633.4	9	36.11	6	39.0444
Tianjin Shui Mi	429	0.8	10.675	7.08333	21.2713	966.358	26.8	-6.5	33.3	22.0333	-1.6	22.0333	-1.6	807	202	12	96.2909	481	37	481	37	79	62.04	15986.7	3.63333	0.513333	350	74.17	20863	18.8667	1.75667	325	73.79	16743.3	18.9667	1.66333	53	64.57	9842	1.03333	0.436667	15858.8	1.0925	3.63333	3714.4	9	36.2	8	40.2543
Yuan Chun Bai	72	0.425	11.8417	11.8	28.3654	1140.35	31.4	-10.2	41.6	25.2	-2.95	25.2	-2.95	612	213	3	147.279	481	12	481	12	27	45.92	15015	5.5	0.39	311	58.83	20986.3	23.5	1.70667	259	64.97	15663.3	19.2333	1.50333	15	54.42	8220.33	-0.933333	0.276667	14971.2	0.969167	5.5	3795.4	8	40.22	5	NA
Gucheng Da Hong Pao	48	0.731	14.8208	10.375	29.1433	970.144	32	-3.6	35.6	26.6667	2.43333	26.6667	2.43333	732	173	16	76.9746	375	57	375	57	109	66.77	14308	8.8	0.77	317	72.85	20284.3	24.6	2.18667	244	77.2	16090	21.3	1.96667	62	68.41	9445	4.46667	0.55	15031.8	1.36833	8.8	3493	9	33.52	10	41.0585
Diao Zhi Bai	18	0.944	16.0042	8.30833	24.9499	940.429	32.2	-1.1	33.3	27.35	4.06667	27.35	4.06667	907	132	29	45.1264	339	106	339	106	211	72.48	13594.7	9.86667	0.9	336	76.8	19584.7	24.9667	2.37	253	78.65	16993.7	22.9	2.14667	107	72.68	9343	6.2	0.683333	14879	1.525	9.86667	3401.2	10	31.87	11	39.115
Ping Bei Zi	101	1.415	16.7875	7.20833	23.948	839.738	31.9	1.8	30.1	24.15	8.95	26.85	6.4	1419	205	47	45.3676	516	167	494	182	317	77.71	12873.3	10.2667	0.97	516	82.81	18692	24.1333	2.42333	419	80.5	16974.7	23.9	2.31	167	74.09	9463.33	8.93333	0.823333	14500.8	1.63167	10.2667	3250	10	29.62	12	38.6813
Zao Shanghai Shui Mi	23	1.026	15.5875	8.79167	26.2438	936.852	31.9	-1.6	33.5	26.8667	6.01667	26.8667	3.75	999	180	32	55.3149	442	114	442	115	213	73.05	13924.3	9.16667	0.886667	417	77.53	19412	24.4	2.37	255	79.18	16892.7	22.7	2.2	114	72.93	9946.67	5.96667	0.69	15043.9	1.53667	9.16667	3417.4	9	32.06	11	37.7476
Ying Zui	23	1.026	15.5875	8.79167	26.2438	936.852	31.9	-1.6	33.5	26.8667	6.01667	26.8667	3.75	999	180	32	55.3149	442	114	442	115	213	73.05	13924.3	9.16667	0.886667	417	77.53	19412	24.4	2.37	255	79.18	16892.7	22.7	2.2	114	72.93	9946.67	5.96667	0.69	15043.9	1.53667	9.16667	3417.4	9	32.06	11	39.8725
Chinese Cling	7	1.665	18.4792	6.95833	25.03	766.991	32.3	4.5	27.8	27.5333	11.55	27.75	9.06667	1718	252	44	52.9853	670	163	652	183	369	79.55	12217.3	12.2	1.09333	626	83.61	17654	25.0333	2.52	560	79.97	16407.7	25.0333	2.37667	163	74.17	9392	11.5333	0.933333	13917.8	1.73083	12.2	3115	11	28	NA	37.7476
Huo Zhu	5	1.126	15.875	7.66667	24.9729	873.815	31.5	0.8	30.7	26.4167	12.25	26.4167	5.13333	964	148	31	55.3865	429	110	429	137	180	75.43	13400	9.16667	0.926667	379	79.83	19083.3	23.6	2.38	282	79.56	17214	23.2333	2.26333	123	74.01	9606.33	7.3	0.763333	14825.9	1.58333	9.16667	3320.2	10	31.01	12	38.6813
Hu Jing Mi Lu	6	1.09	15.4792	7.625	24.4391	890.193	31.3	0.1	31.2	26.2167	11.7333	26.2167	4.5	1001	163	32	54.5169	441	112	441	149	193	74.75	13377	8.73333	0.89	412	79.07	18982.7	23.4	2.35667	269	79.54	16863	22.8333	2.23	127	73.98	9187	6.73333	0.726667	14602.4	1.55083	8.73333	3363.4	10	31.57	11	38.2163
Bai Hua	8	1.134	16.1208	7.29167	23.6742	872.378	31.5	0.7	30.8	26.5333	7.98333	26.65	5.35	1063	167	39	49.7068	439	131	405	138	217	76.12	13241	9.3	0.923333	397	81.97	18656	23.6333	2.37667	318	79.76	16484.3	23.5	2.30333	131	73.62	8859.33	8	0.793333	14310.2	1.59917	9.3	3320.2	10	31.25	12	38.2163
Changling Zao Yu Lu	101	1.415	16.7875	7.20833	23.948	839.738	31.9	1.8	30.1	24.15	8.95	26.85	6.4	1419	205	47	45.3676	516	167	494	182	317	77.71	12873.3	10.2667	0.97	516	82.81	18692	24.1333	2.42333	419	80.5	16974.7	23.9	2.31	167	74.09	9463.33	8.93333	0.823333	14500.8	1.63167	10.2667	3250	10	29.62	12	37.0465
Da Tian Tao	8	1.134	16.1208	7.29167	23.6742	872.378	31.5	0.7	30.8	26.5333	7.98333	26.65	5.35	1063	167	39	49.7068	439	131	405	138	217	76.12	13241	9.3	0.923333	397	81.97	18656	23.6333	2.37667	318	79.76	16484.3	23.5	2.30333	131	73.62	8859.33	8	0.793333	14310.2	1.59917	9.3	3320.2	10	31.25	12	38.6813
Shui Bai Tao	4	1.12	15.7792	8.00833	25.026	901.923	31.9	-0.1	32	26.7333	11.7333	26.7333	4.6	1115	173	38	51.827	478	130	478	156	228	75.37	13512	9.13333	0.926667	465	79.31	19131.7	24.0333	2.40333	282	79.9	17020	22.9667	2.25667	140	74.39	9646	6.86667	0.736667	14827.4	1.58083	9.13333	3358	10	31.36	11	38.6813
Wenzhou Shui Mi	23	1.026	15.5875	8.79167	26.2438	936.852	31.9	-1.6	33.5	26.8667	6.01667	26.8667	3.75	999	180	32	55.3149	442	114	442	115	213	73.05	13924.3	9.16667	0.886667	417	77.53	19412	24.4	2.37	255	79.18	16892.7	22.7	2.2	114	72.93	9946.67	5.96667	0.69	15043.9	1.53667	9.16667	3417.4	9	32.06	11	37.5441
Wujiang Bai	23	1.026	15.5875	8.79167	26.2438	936.852	31.9	-1.6	33.5	26.8667	6.01667	26.8667	3.75	999	180	32	55.3149	442	114	442	115	213	73.05	13924.3	9.16667	0.886667	417	77.53	19412	24.4	2.37	255	79.18	16892.7	22.7	2.2	114	72.93	9946.67	5.96667	0.69	15043.9	1.53667	9.16667	3417.4	9	32.06	11	38.2219
Xiao Hong Hua	8	1.134	16.1208	7.29167	23.6742	872.378	31.5	0.7	30.8	26.5333	7.98333	26.65	5.35	1063	167	39	49.7068	439	131	405	138	217	76.12	13241	9.3	0.923333	397	81.97	18656	23.6333	2.37667	318	79.76	16484.3	23.5	2.30333	131	73.62	8859.33	8	0.793333	14310.2	1.59917	9.3	3320.2	10	31.25	12	38.2163
Yang Tao	14	1.372	16.75	7.95	24.613	888.6	33.2	0.9	32.3	24.8333	12.7833	27.4833	5.65	1351	198	45	45.2221	499	161	477	195	317	76.06	13057.7	10.3	0.97	499	79.16	18633.3	24.8333	2.41667	374	79.11	16835	23.8333	2.26333	161	74.54	9620	8.1	0.78	14536.5	1.6075	10.3	3298.6	10	30.26	12	37.7476
Shang Shan Da Yu Lu	14	1.372	16.75	7.95	24.613	888.6	33.2	0.9	32.3	24.8333	12.7833	27.4833	5.65	1351	198	45	45.2221	499	161	477	195	317	76.06	13057.7	10.3	0.97	499	79.16	18633.3	24.8333	2.41667	374	79.11	16835	23.8333	2.26333	161	74.54	9620	8.1	0.78	14536.5	1.6075	10.3	3298.6	10	30.26	12	37.0465
Longhua Shui Mi	5	1.134	16.2208	7.325	23.7825	873.188	31.6	0.8	30.8	26.65	7.98333	26.7333	5.4	1080	170	40	49.1613	448	134	408	142	221	76.09	13533	9.5	0.923333	403	81.55	19147	23.8	2.37333	322	79.47	17194.3	23.5333	2.29667	134	73.68	9625	7.96667	0.793333	14874.8	1.59667	9.5	3314.8	10	31.17	12	37.7476
Lulin Shui Mi	8	1.134	16.1208	7.29167	23.6742	872.378	31.5	0.7	30.8	26.5333	7.98333	26.65	5.35	1063	167	39	49.7068	439	131	405	138	217	76.12	13241	9.3	0.923333	397	81.97	18656	23.6333	2.37667	318	79.76	16484.3	23.5	2.30333	131	73.62	8859.33	8	0.793333	14310.2	1.59917	9.3	3320.2	10	31.25	12	38.5326
Su Hong	101	1.415	16.7875	7.20833	23.948	839.738	31.9	1.8	30.1	24.15	8.95	26.85	6.4	1419	205	47	45.3676	516	167	494	182	317	77.71	12873.3	10.2667	0.97	516	82.81	18692	24.1333	2.42333	419	80.5	16974.7	23.9	2.31	167	74.09	9463.33	8.93333	0.823333	14500.8	1.63167	10.2667	3250	10	29.62	12	38.6813
San Hua Hong Pan Tao	3	1.107	15.6	7.16667	23.1183	883.59	31.1	0.1	31	26.2667	7.08333	26.2667	4.6	1075	170	40	52.674	461	130	461	138	213	75.39	13653.3	8.96667	0.906667	421	80.71	19210.3	23.4667	2.37333	311	79.35	17178.7	22.8333	2.29	130	73.46	9631.33	7.06667	0.77	14918.4	1.585	8.96667	3368.8	10	31.57	11	37.7476
Jiaqing Pan Tao	17	1.415	16.7	7.2	23.9203	840.965	31.8	1.7	30.1	24.0667	8.83333	26.7833	6.3	1414	204	47	45.3605	514	166	493	182	316	77.31	NA	10.27	NA	514	82.24	NA	24.1333	NA	418	79.92	NA	23.9	NA	166	73.99	NA	8.93333	NA	NA	NA	10.2667	3250	10	29.6551	12	38.8106
Li He Pan Tao	101	1.415	16.7875	7.20833	23.948	839.738	31.9	1.8	30.1	24.15	8.95	26.85	6.4	1419	205	47	45.3676	516	167	494	182	317	77.71	12873.3	10.2667	0.97	516	82.81	18692	24.1333	2.42333	419	80.5	16974.7	23.9	2.31	167	74.09	9463.33	8.93333	0.823333	14500.8	1.63167	10.2667	3250	10	29.62	12	38.8106
Bai Mang Pan Tao	8	1.134	16.1208	7.29167	23.6742	872.378	31.5	0.7	30.8	26.5333	7.98333	26.65	5.35	1063	167	39	49.7068	439	131	405	138	217	76.12	13241	9.3	0.923333	397	81.97	18656	23.6333	2.37667	318	79.76	16484.3	23.5	2.30333	131	73.62	8859.33	8	0.793333	14310.2	1.59917	9.3	3320.2	10	31.25	12	37.9145
Chang Sheng Pan Tao	8	1.134	16.1208	7.29167	23.6742	872.378	31.5	0.7	30.8	26.5333	7.98333	26.65	5.35	1063	167	39	49.7068	439	131	405	138	217	76.12	13241	9.3	0.923333	397	81.97	18656	23.6333	2.37667	318	79.76	16484.3	23.5	2.30333	131	73.62	8859.33	8	0.793333	14310.2	1.59917	9.3	3320.2	10	31.25	12	37.7476
Fenghua Pan Tao	38	1.054	15.9	8.96667	26.5286	937.821	32.3	-1.5	33.8	27.2333	3.91667	27.2333	3.91667	1075	218	25	61.7687	492	102	492	102	205	71.09	13611.3	9.83333	0.886667	473	75.47	19775	24.9667	2.36667	290	77.6	16499.3	22.6333	2.10333	107	71.85	9338.33	6.03333	0.653333	14806	1.5025	9.83333	3406.6	10	32.14	11	37.0465
Wan Pan Tao	95	1.021	16.4167	8.45	26.4062	886.224	32	0	32	27.1	5.1	27.1	5.1	963	175	22	63.4883	441	84	441	84	172	72.71	12481.3	10.6667	0.973333	371	75.94	18241	25.0333	2.36	329	77.42	15644.3	22.8333	2.08	91	72.4	8632.33	7.13333	0.733333	13749.8	1.53667	10.6667	3336.4	10	31.04	12	37.9125
Yu Lu	28	1.2	17.2667	8.06667	24.4444	928.536	33.5	0.5	33	26.0833	7.7	28.4667	5.48333	1240	227	30	60.5682	571	118	504	121	292	74.7	11488.3	11.0333	0.986667	571	77.16	17816.7	26.0667	2.47	259	77.4	15439.7	24.1667	2.17	118	73.27	8275.67	7.66667	0.72	13255.1	1.58667	11.0333	3320.2	10	30.58	12	37.9225
Yu Lu Pan Tao	38	1.054	15.9	8.96667	26.5286	937.821	32.3	-1.5	33.8	27.2333	3.91667	27.2333	3.91667	1075	218	25	61.7687	492	102	492	102	205	71.09	13611.3	9.83333	0.886667	473	75.47	19775	24.9667	2.36667	290	77.6	16499.3	22.6333	2.10333	107	71.85	9338.33	6.03333	0.653333	14806	1.5025	9.83333	3406.6	10	32.14	11	37.0465
Huang Jin Pan Tao	59	0.637	14.5917	10.7667	29.2572	988.619	32.4	-4.4	36.8	26.5667	1.95	26.5667	1.95	697	190	13	92.1765	393	46	393	46	90	65.02	14523	8.5	0.723333	311	71.79	20694.3	24.6667	2.1	244	77.1	16179.3	21.0667	1.91333	52	67.28	9434.33	3.96667	0.51	15207.8	1.31167	8.5	3530.8	9	34.1	7	37.7476
Jian Zui Hong Rou	28	1.2	17.2667	8.06667	24.4444	928.536	33.5	0.5	33	26.0833	7.7	28.4667	5.48333	1240	227	30	60.5682	571	118	504	121	292	74.7	11488.3	11.0333	0.986667	571	77.16	17816.7	26.0667	2.47	259	77.4	15439.7	24.1667	2.17	118	73.27	8275.67	7.66667	0.72	13255.1	1.58667	11.0333	3320.2	10	30.58	12	40.1936
Jingmen Tao	53	1.105	15.825	9.18333	27.3313	920.389	32.3	-1.3	33.6	27.0167	4.16667	27.0167	4.16667	1111	188	29	51.8113	470	120	470	120	236	72.39	13486.3	9.9	0.9	453	76.27	19495.7	24.6667	2.36667	301	78	16616.7	22.5	2.12333	121	72.95	9292	6.13333	0.676667	14722.7	1.51667	9.9	3390.4	10	31.76	11	40.2244
Wuhan Da Hong Pao	26	1.261	17.0042	7.84167	24.2027	908.797	32.9	0.5	32.4	21.5	7.6	27.9167	5.41667	1272	211	35	52.9785	544	138	469	140	327	75.97	11525	11.0333	1.02	536	77.37	17826	25.6333	2.47667	271	77.2	15833.3	23.7333	2.19667	138	74.37	8382.33	7.6	0.753333	13391.7	1.61167	11.0333	3325.6	10	30	12	39.4444
Wei Jian Hong Rou	123	1.355	17.6458	7.85833	26.1944	791.527	33.4	3.4	30	25.0667	7.51667	27.1833	7.51667	1253	198	15	66.0738	550	57	529	57	190	74.22	11624	12.8667	1.10667	550	78.21	17475.3	25.0333	2.42333	423	79.67	14768	23.4	2.18667	90	78.24	7121	9.16667	0.936667	12747.1	1.66333	12.8667	3206.8	10	30.71	15	40.1936
Hei Bu Dai	42	0.717	14.975	10.5333	29.0976	985.339	32.2	-4	36.2	26.8833	2.35	26.8833	2.35	794	214	15	88.5409	441	58	441	58	110	65.75	14791.7	8.86667	0.736667	366	72.91	20806.7	24.7667	2.15333	259	77.46	16637	21.7	1.96	59	69.02	9663	4.43333	0.536667	15474.6	1.34667	8.86667	3503.8	9	33.87	9	41.1222
Da Hong Pao	8	1.134	16.1208	7.29167	23.6742	872.378	31.5	0.7	30.8	26.5333	7.98333	26.65	5.35	1063	167	39	49.7068	439	131	405	138	217	76.12	13241	9.3	0.923333	397	81.97	18656	23.6333	2.37667	318	79.76	16484.3	23.5	2.30333	131	73.62	8859.33	8	0.793333	14310.2	1.59917	9.3	3320.2	10	31.25	12	39.4444
Wu Hei Ji Rou Tao	23	1.026	15.5875	8.79167	26.2438	936.852	31.9	-1.6	33.5	26.8667	6.01667	26.8667	3.75	999	180	32	55.3149	442	114	442	115	213	73.05	13924.3	9.16667	0.886667	417	77.53	19412	24.4	2.37	255	79.18	16892.7	22.7	2.2	114	72.93	9946.67	5.96667	0.69	15043.9	1.53667	9.16667	3417.4	9	32.06	11	39.9476
Wuhan 2	6	1.09	15.4792	7.625	24.4391	890.193	31.3	0.1	31.2	26.2167	11.7333	26.2167	4.5	1001	163	32	54.5169	441	112	441	149	193	74.75	13377	8.73333	0.89	412	79.07	18982.7	23.4	2.35667	269	79.54	16863	22.8333	2.23	127	73.98	9187	6.73333	0.726667	14602.4	1.55083	8.73333	3363.4	10	31.57	11	39.4227
Wanzhou Suan Tao	6	1.09	15.4792	7.625	24.4391	890.193	31.3	0.1	31.2	26.2167	11.7333	26.2167	4.5	1001	163	32	54.5169	441	112	441	149	193	74.75	13377	8.73333	0.89	412	79.07	18982.7	23.4	2.35667	269	79.54	16863	22.8333	2.23	127	73.98	9187	6.73333	0.726667	14602.4	1.55083	8.73333	3363.4	10	31.57	11	39.7032
Hunchun Tao Shi Sheng	501	0.847	3.64583	10.6417	24.2407	1237.79	24.4	-19.5	43.9	17.7833	-12.2167	18.1	-12.2167	663	155	5	89.142	361	20	357	20	54	59.46	14040.3	-4.5	0.28	273	72.88	17615	14.6333	1.23667	302	74.36	13764.7	13.7333	1.11333	34	66.09	6960.67	-9.3	0.18	13095.2	0.7025	-4.5	4319.2	6	43.07	7	35.3106
Xiang Tao	51	0.726	8.5625	11.075	24.1812	1288.37	29.3	-16.5	45.8	23.6167	-8.3	23.6167	-8.3	729	189	7	102.667	452	25	452	25	61	53.92	14364.3	1.26667	0.356667	338	67.96	19678.7	21.2	1.66667	293	71.77	14973	17.4333	1.41333	37	62.49	7238	-5.76667	0.236667	14063.5	0.918333	1.26667	4124.8	8	41.63	7	37.3023
Hunchun Tao Shi Sheng	51	0.726	8.5625	11.075	24.1812	1288.37	29.3	-16.5	45.8	23.6167	-8.3	23.6167	-8.3	729	189	7	102.667	452	25	452	25	61	53.92	14364.3	1.26667	0.356667	338	67.96	19678.7	21.2	1.66667	293	71.77	14973	17.4333	1.41333	37	62.49	7238	-5.76667	0.236667	14063.5	0.918333	1.26667	4124.8	8	41.63	7	35.3106
Hong Hua Shan Tao	51	0.726	8.5625	11.075	24.1812	1288.37	29.3	-16.5	45.8	23.6167	-8.3	23.6167	-8.3	729	189	7	102.667	452	25	452	25	61	53.92	14364.3	1.26667	0.356667	338	67.96	19678.7	21.2	1.66667	293	71.77	14973	17.4333	1.41333	37	62.49	7238	-5.76667	0.236667	14063.5	0.918333	1.26667	4124.8	8	41.63	7	36.8259
Jilin 8701	51	0.726	8.5625	11.075	24.1812	1288.37	29.3	-16.5	45.8	23.6167	-8.3	23.6167	-8.3	729	189	7	102.667	452	25	452	25	61	53.92	14364.3	1.26667	0.356667	338	67.96	19678.7	21.2	1.66667	293	71.77	14973	17.4333	1.41333	37	62.49	7238	-5.76667	0.236667	14063.5	0.918333	1.26667	4124.8	8	41.63	7	36.5817
Jilin 8801	51	0.726	8.5625	11.075	24.1812	1288.37	29.3	-16.5	45.8	23.6167	-8.3	23.6167	-8.3	729	189	7	102.667	452	25	452	25	61	53.92	14364.3	1.26667	0.356667	338	67.96	19678.7	21.2	1.66667	293	71.77	14973	17.4333	1.41333	37	62.49	7238	-5.76667	0.236667	14063.5	0.918333	1.26667	4124.8	8	41.63	7	36.6838
Jilin 8601	51	0.726	8.5625	11.075	24.1812	1288.37	29.3	-16.5	45.8	23.6167	-8.3	23.6167	-8.3	729	189	7	102.667	452	25	452	25	61	53.92	14364.3	1.26667	0.356667	338	67.96	19678.7	21.2	1.66667	293	71.77	14973	17.4333	1.41333	37	62.49	7238	-5.76667	0.236667	14063.5	0.918333	1.26667	4124.8	8	41.63	7	36.2064
Jilin 8501	422	0.923	4.44583	12.9583	25.113	1397.89	27.1	-24.5	51.6	20.5167	-14.25	20.5167	-14.25	837	209	9	98.4127	516	32	516	32	78	58.92	14505.3	-2.96667	0.31	401	70.41	19487.7	18.2	1.42	310	74.42	14805.3	13.7667	1.22	48	68.36	7053.33	-11.2	0.196667	13962.9	0.786667	-2.96667	4470.4	7	42.18	8	36.2311
Shenyang 1	31	0.586	10.9167	7.33333	21.0124	1038.65	27.3	-7.6	34.9	22.8167	-2.46667	22.8167	-2.46667	626	172	7	104.343	395	28	395	28	51	57.5	15450.3	3.6	0.463333	294	74.08	21305.3	20.1667	1.74333	239	72.54	16279.7	19.5333	1.70667	42	59.1	7901	0.4	0.386667	15234.1	1.075	3.6	3768.4	8	38.91	7	36.8259
Shenyang 2	31	0.586	10.9167	7.33333	21.0124	1038.65	27.3	-7.6	34.9	22.8167	-2.46667	22.8167	-2.46667	626	172	7	104.343	395	28	395	28	51	57.5	15450.3	3.6	0.463333	294	74.08	21305.3	20.1667	1.74333	239	72.54	16279.7	19.5333	1.70667	42	59.1	7901	0.4	0.386667	15234.1	1.075	3.6	3768.4	8	38.91	7	36.8259
Shenyang 3	501	0.847	3.64583	10.6417	24.2407	1237.79	24.4	-19.5	43.9	17.7833	-12.2167	18.1	-12.2167	663	155	5	89.142	361	20	357	20	54	59.46	14040.3	-4.5	0.28	273	72.88	17615	14.6333	1.23667	302	74.36	13764.7	13.7333	1.11333	34	66.09	6960.67	-9.3	0.18	13095.2	0.7025	-4.5	4319.2	6	43.07	7	36.8259
Shenyang 4	48	0.697	8.63333	11.05	24.0217	1297.36	29.5	-16.5	46	23.8	-8.31667	23.8	-8.31667	697	180	6	102.426	432	22	432	22	58	53.92	13976.7	1.33333	0.346667	326	67.96	19548.7	21.4333	1.65667	279	71.77	14821.3	17.5	1.40333	34	62.49	6884	-5.76667	0.23	13807.7	0.909167	1.33333	4124.8	8	41.81	7	36.8259
Shenyang 5	222	0.614	4.98333	11.4167	22.7878	1440.48	27.9	-22.2	50.1	21.7333	-13.9	21.7333	-13.9	623	183	5	112.648	419	15	419	15	41	56.73	14362	-3.03333	0.286667	327	65.86	20562.3	19.4	1.45	231	71.13	15408	14.6	1.23	24	67.47	6842.67	-11.1	0.176667	14293.8	0.785833	-3.03333	4438	7	43.87	6	36.8259
Yi Hong Shui Mi	233	0.671	5.52917	11.8417	23.6361	1402.92	28.4	-21.7	50.1	21.8833	-12.8833	21.8833	-12.8833	633	176	5	108.056	411	17	411	17	46	55	14892.3	-2.26667	0.293333	322	65.77	20861	19.6	1.48333	240	70.8	15632	14.8667	1.24667	25	65.61	7439.33	-10.1667	0.186667	14706.2	0.8025	-2.26667	4389.4	7	43.322	7	36.8259
Shenyang Wu Yue Xian	398	0.774	4.40833	12.5667	24.028	1447.79	27.6	-24.7	52.3	21.1	-14.8167	21.1	-14.8167	721	194	7	103.52	459	23	459	23	59	58.16	14760	-3.5	0.286667	364	67.81	20076.7	18.7333	1.4	264	72.66	15032	14.1	1.19333	34	67.96	7288.33	-11.7333	0.176667	14289.2	0.764167	-3.5	4502.8	7	43.27	8	36.8259
Jilin 8903	229	0.685	4.90417	12.075	23.4922	1445.97	28	-23.4	51.4	21.6333	-14.2167	21.6333	-14.2167	673	188	6	107.443	439	19	439	19	49	57.82	14516.7	-3.1	0.293333	345	67.11	20337	19.2333	1.45333	249	72.25	15230	14.5667	1.24667	30	67.97	7050	-11.2667	0.186667	14283.4	0.795	-3.1	4465	7	43.52	7	35.1716
Zao Huang Jin	51	0.726	8.5625	11.075	24.1812	1288.37	29.3	-16.5	45.8	23.6167	-8.3	23.6167	-8.3	729	189	7	102.667	452	25	452	25	61	53.92	14364.3	1.26667	0.356667	338	67.96	19678.7	21.2	1.66667	293	71.77	14973	17.4333	1.41333	37	62.49	7238	-5.76667	0.236667	14063.5	0.918333	1.26667	4124.8	8	41.63	7	37.3023
Rikaze Guang He Tao	4239	0.373	3.34583	15.375	43.9286	708.258	18.8	-16.2	35	10.8833	-5.53333	11.7167	-5.53333	300	108	0	154.553	243	0	242	0	3	35.02	18232	-0.433333	0.166667	143	55.97	20207.7	10.5667	0.676667	153	60.44	17028.7	8.16667	0.68	1	34.79	13522.7	-4.73333	0.126667	17247.8	0.4125	-0.433333	3914.2	5	29.27	7	25.6964
Aba Guang He Tao	3629	0.665	5.05417	13.3917	45.7053	602.538	18.2	-11.1	29.3	12.1167	-1.65	12.1167	-2.55	515	116	2	100.184	312	8	312	9	38	51.32	15158.7	1.33333	0.31	249	64.9	17088.7	10.9667	0.826667	220	69.73	14876	9.46667	0.806667	8	48.63	11850.3	-1.66667	0.206667	14743.4	0.5375	1.33333	3736	6	29.72	8	31.1511
Julong 11	3629	0.665	5.05417	13.3917	45.7053	602.538	18.2	-11.1	29.3	12.1167	-1.65	12.1167	-2.55	515	116	2	100.184	312	8	312	9	38	51.32	15158.7	1.33333	0.31	249	64.9	17088.7	10.9667	0.826667	220	69.73	14876	9.46667	0.806667	8	48.63	11850.3	-1.66667	0.206667	14743.4	0.5375	1.33333	3736	6	29.72	8	31.1486
Julong 12	3651	0.665	5.05417	13.3917	45.7053	602.538	18.2	-11.1	29.3	12.1167	-1.65	12.1167	-2.55	515	116	2	100.184	312	8	312	9	38	51.32	15154.3	1.33333	0.303333	249	64.9	17081	10.9667	0.82	220	69.73	14871.3	9.46667	0.803333	8	48.63	11835.3	-1.66667	0.203333	14735.5	0.5325	1.33333	3736	6	29.71	8	31.1486
Julong 13	3629	0.665	5.05417	13.3917	45.7053	602.538	18.2	-11.1	29.3	12.1167	-1.65	12.1167	-2.55	515	116	2	100.184	312	8	312	9	38	51.32	15158.7	1.33333	0.31	249	64.9	17088.7	10.9667	0.826667	220	69.73	14876	9.46667	0.806667	8	48.63	11850.3	-1.66667	0.206667	14743.4	0.5375	1.33333	3736	6	29.72	8	31.1486
Julong 15	5219	0.746	-2.8375	12.9417	43.5746	619.905	10.4	-19.3	29.7	4.6	-9.43333	4.6	-10.45	546	124	3	98.6076	328	14	328	14	41	50.63	15092.3	-7.03333	0.2	260	63.4	17676.7	3.03333	0.58	231	67.6	15178.7	1.86667	0.57	14	47.73	11322.3	-9.5	0.12	14817.5	0.3675	-7.03333	4162.6	1	29.98	4	31.1486
Julong 16	2966	0.7	8.63333	13.0167	44.1243	611.898	22	-7.5	29.5	15.7333	1.6	15.7333	0.75	746	157	3	97.0781	439	14	439	15	65	49.99	15481.3	5.33333	0.46	374	63.51	18025	14.5333	1.05667	293	67.03	15329.7	13.3	1.01667	14	47.74	11755	1.66667	0.33	15147.8	0.715833	5.33333	3563.2	5	30.2	8	31.1486
Yan Tian Jin Qu Zao Hua Tao	2966	0.7	8.63333	13.0167	44.1243	611.898	22	-7.5	29.5	15.7333	1.6	15.7333	0.75	746	157	3	97.0781	439	14	439	15	65	49.99	15481.3	5.33333	0.46	374	63.51	18025	14.5333	1.05667	293	67.03	15329.7	13.3	1.01667	14	47.74	11755	1.66667	0.33	15147.8	0.715833	5.33333	3563.2	5	30.2	8	31.1486
Lawu 1	2966	0.7	8.63333	13.0167	44.1243	611.898	22	-7.5	29.5	15.7333	1.6	15.7333	0.75	746	157	3	97.0781	439	14	439	15	65	49.99	15481.3	5.33333	0.46	374	63.51	18025	14.5333	1.05667	293	67.03	15329.7	13.3	1.01667	14	47.74	11755	1.66667	0.33	15147.8	0.715833	5.33333	3563.2	5	30.2	8	30.688
Lawu 2	2976	0.7	8.63333	13.0167	44.1243	611.898	22	-7.5	29.5	15.7333	1.6	15.7333	0.75	746	157	3	97.0781	439	14	439	15	65	49.99	15440.3	5.33333	0.453333	374	63.51	18013.3	14.5333	1.04667	293	67.03	15311	13.3	1.00667	14	47.74	11728.7	1.66667	0.326667	15123.3	0.708333	5.33333	3563.2	5	30.2	8	30.688
Lawu 3	3038	0.7	7.89583	13.0917	43.7848	621.17	21.5	-8.4	29.9	15.1167	0.783333	15.1167	-0.0833333	711	150	3	97.8404	421	14	421	14	59	49.99	15569.3	4.46667	0.44	357	63.51	18146.3	13.8333	1.02667	281	67.03	15449	12.5	0.99	14	47.74	11842	0.833333	0.32	15251.7	0.694167	4.46667	3611.8	5	30.26	8	30.688
Lawu 4	3116	0.78	8.09583	15.5417	46.5319	627.996	22.9	-10.5	33.4	15.2833	-0.166667	15.2833	-0.166667	761	150	3	89.3949	387	13	387	13	71	60.41	12888.7	5.46667	0.383333	380	71.17	16870.7	14.2	0.983333	295	75.32	13352.7	12.6	0.916667	15	60.81	8912	0.666667	0.27	13006	0.638333	5.46667	3611.8	7	31.91	9	30.688
Lawu 3-1	3046	0.7	7.89583	13.0917	43.7848	621.17	21.5	-8.4	29.9	15.1167	0.783333	15.1167	-0.0833333	711	150	3	97.8404	421	14	421	14	59	49.99	15574.3	4.46667	0.44	357	63.51	18155.3	13.8333	1.02667	281	67.03	15505.7	12.5	0.99	14	47.74	11863	0.833333	0.32	15274.6	0.694167	4.46667	3611.8	5	30.26	8	30.688
Basu 1	2882	0.688	9.84167	12.8833	44.4253	598.251	22.9	-6.1	29	16.75	2.96667	16.75	2.1	844	178	3	97.0322	499	15	499	17	76	50.5	15408	6.56667	0.486667	423	63.7	17849.7	15.5667	1.09	330	67.24	15296.3	14.4	1.05	15	48	11790	2.96667	0.346667	15086	0.743333	6.56667	3493	4	30	1	30.0001
2010-138	4390	0.685	5.57083	12.975	43.9831	613.012	18.9	-10.6	29.5	12.75	-1.31667	12.75	-2.21667	636	134	3	96.7246	373	13	373	13	54	50.55	15076.3	2.06667	0.27	314	63.84	18130.3	11.4667	0.72	255	67.23	15236	10.3333	0.686667	13	48.41	10860.3	-1.23333	0.18	14825.8	0.464167	2.06667	3719.8	7	30	8	29.285
2010-138b	4390	0.685	5.57083	12.975	43.9831	613.012	18.9	-10.6	29.5	12.75	-1.31667	12.75	-2.21667	636	134	3	96.7246	373	13	373	13	54	50.55	15076.3	2.06667	0.27	314	63.84	18130.3	11.4667	0.72	255	67.23	15236	10.3333	0.686667	13	48.41	10860.3	-1.23333	0.18	14825.8	0.464167	2.06667	3719.8	7	30	8	29.285
Yuxu 1	4581	0.681	3.80417	13.1083	43.9877	617.614	17.2	-12.6	29.8	11.0667	-4	11.0667	-4	544	117	2	98.6246	322	9	322	9	43	51.1	15387.3	0.133333	0.253333	267	64.15	18162.3	9.7	0.69	224	67.63	15499.3	8.53333	0.656667	10	48.79	11331.3	-3	0.166667	15095.1	0.441667	0.133333	3817	4	29.91	7	29.285
Yuxu 2	4387	0.681	3.80417	13.1083	43.9877	617.614	17.2	-12.6	29.8	11.0667	-4	11.0667	-4	544	117	2	98.6246	322	9	322	9	43	51.1	15450	0.133333	0.26	267	64.15	18161	9.7	0.706667	224	67.63	15524.7	8.53333	0.67	10	48.79	11431.7	-3	0.173333	15141.8	0.4525	0.133333	3817	4	29.9	7	29.285
Yuxu 3	3827	0.67	5.24583	12.9583	45.151	586.218	17.9	-10.8	28.7	12.1333	-2.18333	12.1333	-2.18333	549	116	2	96.7562	320	9	320	9	48	54.36	15822.7	1.6	0.356667	266	65.76	18006	10.7333	0.88	225	68.64	15531	9.73333	0.836667	10	50.46	12131	-1.3	0.253333	15372.7	0.581667	1.6	3725.2	5	29.32	8	29.285
Yuxu 4	3827	0.67	5.24583	12.9583	45.151	586.218	17.9	-10.8	28.7	12.1333	-2.18333	12.1333	-2.18333	549	116	2	96.7562	320	9	320	9	48	54.36	15822.7	1.6	0.356667	266	65.76	18006	10.7333	0.88	225	68.64	15531	9.73333	0.836667	10	50.46	12131	-1.3	0.253333	15372.7	0.581667	1.6	3725.2	5	29.32	8	29.285
Runa 1	4386	0.619	5.20833	13.1833	45.3036	593.498	18	-11.1	29.1	12.1833	-2.31667	12.1833	-2.31667	521	112	2	98.1449	307	8	307	8	43	53.67	15687.7	1.46667	0.273333	254	65.56	18146.3	10.8	0.73	214	68.34	15555.7	9.66667	0.693333	10	49.93	11778.3	-1.46667	0.186667	15292	0.470833	1.46667	3736	5	29.32	8	29.5051
Tongmai 1	3047	0.636	9.70833	12.4333	45.3771	561.637	22	-5.4	27.4	16.1833	2.45	16.1833	2.45	690	135	2	93.8003	386	10	386	10	68	51.75	16218.7	6.53333	0.48	344	64.6	18278.3	14.9667	1.1	267	67.69	15980.7	14.0333	1.05333	11	48.96	12483	3.33333	0.35	15740.2	0.745833	6.53333	3471.4	5	29.5	7	28.6331
Tongmai 2	3527	0.775	3.9875	11.8583	43.9198	579.228	16.2	-10.8	27	10.7667	-2.15	10.7667	-3.26667	577	129	4	91.9171	334	16	334	18	64	51.25	15059.7	0.0333333	0.35	262	65.5	16587.7	9.63333	0.873333	235	70.49	14377.7	8.46667	0.846667	16	49.1	11999.3	-2.13333	0.24	14506.1	0.5775	0.0333333	3763	5	29.06	7	28.6331
Paizhen 1	3563	0.287	7.69167	14.9167	45.3394	654.918	22.1	-10.8	32.9	15.3833	-0.633333	15.3833	-0.633333	384	111	0	130.231	281	0	281	0	14	43.85	18102.3	4.1	0.256667	198	61.51	20208.3	14.3	0.793333	170	65.06	17795.7	12.2667	0.786667	2	42.56	13721.7	0.166667	0.203333	17457	0.51	4.1	3649.6	5	29.24	7	28.0064
Paizhen 2	2988	0.628	9.44583	12.6083	45.0298	573.444	22	-6	28	16.0667	2.03333	16.0667	2.03333	661	131	2	94.4293	372	10	372	10	64	51.39	16340	6.26667	0.473333	331	64.64	18407.7	14.9	1.09667	255	67.8	16167.7	13.9	1.05667	11	49.1	12575.7	2.96667	0.35	15872.8	0.744167	6.26667	3493	4	29.64	7	28.0064
Paizhen 3	2988	0.628	9.44583	12.6083	45.0298	573.444	22	-6	28	16.0667	2.03333	16.0667	2.03333	661	131	2	94.4293	372	10	372	10	64	51.39	16340	6.26667	0.473333	331	64.64	18407.7	14.9	1.09667	255	67.8	16167.7	13.9	1.05667	11	49.1	12575.7	2.96667	0.35	15872.8	0.744167	6.26667	3493	4	29.64	7	28.5906
Paizhen 4	4052	0.318	4.6	14.7333	43.8492	686.903	19.5	-14.1	33.6	12.7	-2.48333	12.7	-4.05	345	106	0	138.49	264	2	264	2	7	39.8	17943.3	0.8	0.18	175	58.72	20780.3	11.5	0.69	161	62.56	17762.7	9.36667	0.7	2	40.19	13388	-3.33333	0.14	17468.6	0.4275	0.8	3833.2	5	29.72	7	28.5906
Daze 1	4236	0.318	4.37083	14.7583	43.7933	687.946	19.3	-14.4	33.7	12.4667	-2.73333	12.4667	-4.3	335	104	0	140.085	258	1	258	1	5	39.8	17874	0.6	0.163333	170	58.72	20686.7	11.3667	0.65	158	62.56	17701.7	9.2	0.656667	2	40.19	13321.3	-3.5	0.123333	17395.9	0.398333	0.6	3844	5	29.72	7	28.276
Daze 2	3880	0.336	7.68333	14.5833	44.1919	661.71	22.5	-10.5	33	15.4167	-0.733333	15.4167	-0.733333	431	129	0	135.348	327	2	327	2	10	39.8	18059.3	4.23333	0.196667	222	58.72	20721.7	14.4333	0.73	196	62.56	17898	12.1333	0.736667	3	40.19	13579	-0.0666667	0.156667	17564.5	0.455	4.23333	3655	5	29.63	7	28.1236
Lanong 1	3074	0.628	9.63333	12.5333	45.2467	568.408	22.1	-5.6	27.7	16.1833	2.28333	16.1833	2.28333	673	132	2	94.0699	377	10	377	10	65	51.39	16337.7	6.4	0.46	336	64.64	18354.3	14.9333	1.07333	261	67.8	16089.3	14	1.03	11	49.1	12545	3.13333	0.336667	15831.6	0.725	6.4	3482.2	4	29.623	7	26.9684
Lanong 2	3074	0.628	9.63333	12.5333	45.2467	568.408	22.1	-5.6	27.7	16.1833	2.28333	16.1833	2.28333	673	132	2	94.0699	377	10	377	10	65	51.39	16337.7	6.4	0.46	336	64.64	18354.3	14.9333	1.07333	261	67.8	16089.3	14	1.03	11	49.1	12545	3.13333	0.336667	15831.6	0.725	6.4	3482.2	4	29.622	7	27.8369
Lanong 3	2948	0.652	9.80417	12.375	45.3297	556.497	22	-5.3	27.3	16.2167	2.6	16.2167	2.6	724	143	2	93.5823	406	11	406	11	72	52.29	16253.7	6.6	0.5	361	64.81	18248	14.9667	1.13	279	67.93	16128	14.0667	1.08667	12	49.37	12568	3.43333	0.37	15799.4	0.771667	6.6	3466	5	29.472	8	27.8369
Pabangka 1	4390	0.685	5.57083	12.975	43.9831	613.012	18.9	-10.6	29.5	12.75	-1.31667	12.75	-2.21667	636	134	3	96.7246	373	13	373	13	54	50.55	15076.3	2.06667	0.27	314	63.84	18130.3	11.4667	0.72	255	67.23	15236	10.3333	0.686667	13	48.41	10860.3	-1.23333	0.18	14825.8	0.464167	2.06667	3719.8	7	30	8	25.9944
Pabangka 2	3527	0.775	3.9875	11.8583	43.9198	579.228	16.2	-10.8	27	10.7667	-2.15	10.7667	-3.26667	577	129	4	91.9171	334	16	334	18	64	51.25	15059.7	0.0333333	0.35	262	65.5	16587.7	9.63333	0.873333	235	70.49	14377.7	8.46667	0.846667	16	49.1	11999.3	-2.13333	0.24	14506.1	0.5775	0.0333333	3763	5	29.06	7	25.9944
Shannan Tibet	4390	0.685	5.57083	12.975	43.9831	613.012	18.9	-10.6	29.5	12.75	-1.31667	12.75	-2.21667	636	134	3	96.7246	373	13	373	13	54	50.55	15076.3	2.06667	0.27	314	63.84	18130.3	11.4667	0.72	255	67.23	15236	10.3333	0.686667	13	48.41	10860.3	-1.23333	0.18	14825.8	0.464167	2.06667	3719.8	7	30	8	25.9944
2010 Tibet 15	2675	0.688	10.3542	12.7417	44.5513	589.952	23.2	-5.4	28.6	17.15	3.58333	17.15	2.71667	902	190	4	96.4114	532	17	532	20	83	53.01	15519.7	7.13333	0.513333	451	65.43	17872.7	16	1.14	351	68.73	15358.3	14.8333	1.09667	17	49.94	11916	3.63333	0.373333	15166.7	0.780833	7.13333	3460.6	4	29.9	7	27.8369
2010 Tibet 17	3804	0.2	4.1125	14.9417	43.8172	695.208	19.1	-15	34.1	12.2833	-4.63333	12.2833	-4.63333	301	99	0	147.057	237	0	237	0	4	35.94	18236.7	0.333333	0.21	150	56.62	20175.3	11.1	0.776667	146	61.13	17286.7	8.8	0.773333	1	36.25	13609.3	-3.9	0.17	17327	0.4825	0.333333	3865.6	3	29.33	6	27.8369
2010 Tibet 26	3855	0.331	4.84167	15.6	44.3182	705.855	20.5	-14.7	35.2	13.15	-4.05	13.15	-4.05	365	129	0	151.366	291	0	291	0	5	34.83	18334.7	1.2	0.216667	174	55.67	20563.7	12.0667	0.78	185	60.22	17472	9.6	0.776667	1	34.44	13532	-3.26667	0.17	17475.6	0.485833	1.2	3827.8	5	29.33	7	28.2759
2010 Tibet 28	3988	0.216	6.00417	15.6083	44.4682	698.389	21.7	-13.4	35.1	14.1667	-2.85	14.1667	-2.85	414	142	0	148.589	327	0	327	0	6	34.83	18076.3	2.5	0.193333	199	55.67	20298.7	13.0667	0.74	207	60.22	17041.7	10.5667	0.74	2	34.44	13385.3	-2.2	0.156667	17200.5	0.4575	2.5	3768.4	5	29.37	7	27.6208
2010 Tibet 29	3074	0.628	9.63333	12.5333	45.2467	568.408	22.1	-5.6	27.7	16.1833	2.28333	16.1833	2.28333	673	132	2	94.0699	377	10	377	10	65	51.39	16337.7	6.4	0.46	336	64.64	18354.3	14.9333	1.07333	261	67.8	16089.3	14	1.03	11	49.1	12545	3.13333	0.336667	15831.6	0.725	6.4	3482.2	4	29.62	7	27.6208
2010 Tibet 32	523	1.179	15.9125	6.90833	26.1679	717.097	28.8	2.4	26.4	23.65	6.55	24.3667	6.55	952	237	7	102.304	588	28	572	28	86	71.61	9645.67	11.7333	1.07	429	75.12	14886.7	22.9667	2.26667	401	79.85	11134	20.8333	2.09667	36	75.55	5663.67	8.13333	0.89	10332.5	1.58083	11.7333	3250	10	30.6	14	29.7568
2010 Tibet 54	3527	0.775	3.9875	11.8583	43.9198	579.228	16.2	-10.8	27	10.7667	-2.15	10.7667	-3.26667	577	129	4	91.9171	334	16	334	18	64	51.25	15059.7	0.0333333	0.35	262	65.5	16587.7	9.63333	0.873333	235	70.49	14377.7	8.46667	0.846667	16	49.1	11999.3	-2.13333	0.24	14506.1	0.5775	0.0333333	3763	5	29.06	7	25.9034
2010 Tibet 55	3527	0.775	3.9875	11.8583	43.9198	579.228	16.2	-10.8	27	10.7667	-2.15	10.7667	-3.26667	577	129	4	91.9171	334	16	334	18	64	51.25	15059.7	0.0333333	0.35	262	65.5	16587.7	9.63333	0.873333	235	70.49	14377.7	8.46667	0.846667	16	49.1	11999.3	-2.13333	0.24	14506.1	0.5775	0.0333333	3763	5	29.06	7	25.6357
2010 Tibet 57	3527	0.775	3.9875	11.8583	43.9198	579.228	16.2	-10.8	27	10.7667	-2.15	10.7667	-3.26667	577	129	4	91.9171	334	16	334	18	64	51.25	15059.7	0.0333333	0.35	262	65.5	16587.7	9.63333	0.873333	235	70.49	14377.7	8.46667	0.846667	16	49.1	11999.3	-2.13333	0.24	14506.1	0.5775	0.0333333	3763	5	29.06	7	25.6357
Hong Rou Guang He Tao	4688	0.696	0.625	11.9167	43.8113	578.322	12.7	-14.5	27.2	7.43333	-5.41667	7.43333	-6.56667	601	137	4	94.5322	354	17	354	19	61	51.25	14558.7	-3.4	0.236667	275	65.5	16352	6.23333	0.67	248	70.49	13979.7	5.13333	0.646667	17	49.1	11249.3	-5.4	0.146667	14034.9	0.425	-3.4	3941.2	5	29.04	7	27.8369
Qing Mao Zi Bai Hua	3629	0.665	5.05417	13.3917	45.7053	602.538	18.2	-11.1	29.3	12.1167	-1.65	12.1167	-2.55	515	116	2	100.184	312	8	312	9	38	51.32	15158.7	1.33333	0.31	249	64.9	17088.7	10.9667	0.826667	220	69.73	14876	9.46667	0.806667	8	48.63	11850.3	-1.66667	0.206667	14743.4	0.5375	1.33333	3736	6	29.72	8	37.0062
Shi Tao	1108	1.359	18.4792	8.10833	37.7132	508.328	28.2	6.7	21.5	23.9333	11.5333	23.9333	11.5333	1454	297	16	88.2859	829	58	829	58	128	75.51	13310.7	16.1333	1.49333	702	80.32	17503.3	23.5667	2.52	545	81.09	15849.7	21.6	2.29333	79	77.62	9949.67	12.5667	1.20667	14153.3	1.87833	16.1333	3096.64	14	23.25	13	37.2698
Ying Ge Tao	34	1.676	22.7125	7.25833	34.3997	519.616	32	10.9	21.1	28.3667	17.5	28.3667	15.8333	2010	345	29	77.9699	1024	96	1024	107	289	80.65	10713	19	1.76667	949	82.6	16472	27.5667	2.95667	676	77.4	16194.3	26.8333	2.7	96	69.81	11559.7	17.5	1.34	13734.8	2.19083	19	2611.6	14	22.5576	14	36.8242
Xian Tao	34	1.676	22.7125	7.25833	34.3997	519.616	32	10.9	21.1	28.3667	17.5	28.3667	15.8333	2010	345	29	77.9699	1024	96	1024	107	289	80.65	10713	19	1.76667	949	82.6	16472	27.5667	2.95667	676	77.4	16194.3	26.8333	2.7	96	69.81	11559.7	17.5	1.34	13734.8	2.19083	19	2611.6	14	22.5575	14	37.2698
Nanshan Tian Tao	34	1.676	22.7125	7.25833	34.3997	519.616	32	10.9	21.1	28.3667	17.5	28.3667	15.8333	2010	345	29	77.9699	1024	96	1024	107	289	80.65	10713	19	1.76667	949	82.6	16472	27.5667	2.95667	676	77.4	16194.3	26.8333	2.7	96	69.81	11559.7	17.5	1.34	13734.8	2.19083	19	2611.6	14	22.5571	14	38.4264
Huang La Tao	34	1.676	22.7125	7.25833	34.3997	519.616	32	10.9	21.1	28.3667	17.5	28.3667	15.8333	2010	345	29	77.9699	1024	96	1024	107	289	80.65	10713	19	1.76667	949	82.6	16472	27.5667	2.95667	676	77.4	16194.3	26.8333	2.7	96	69.81	11559.7	17.5	1.34	13734.8	2.19083	19	2611.6	14	22.5572	14	37.7895
Nan Fang Zao Shu Tao	416	1.783	22.175	7.01667	34.0615	515.181	31.2	10.6	20.6	27.7833	17.05	27.7833	15.3833	2193	383	30	78.8736	1128	99	1128	115	306	80.18	10715	18.4333	1.61333	1042	82.45	16289	27	2.79667	746	77.62	16033.7	26.3	2.54	99	70.36	11415.7	17.0667	1.21667	13613.3	2.04167	18.4333	2652.88	14	22.5876	14	38.5477
Nan Fang Hong Hua Zao	9	1.617	21.975	6.06667	31.2715	497.77	31.9	12.5	19.4	27.7667	17.5667	27.7667	15.85	2079	272	84	39.5886	760	270	745	324	460	84.14	12947.3	17.7667	1.69	699	88.74	18685	26.4	2.78667	650	81.35	16998.7	26	2.69	270	75.06	10123.3	17.5667	1.58667	14688.6	2.18833	17.7667	2584.08	14	25.01	16	38.6444
Gua Tao	1108	1.359	18.4792	8.10833	37.7132	508.328	28.2	6.7	21.5	23.9333	11.5333	23.9333	11.5333	1454	297	16	88.2859	829	58	829	58	128	75.51	13310.7	16.1333	1.49333	702	80.32	17503.3	23.5667	2.52	545	81.09	15849.7	21.6	2.29333	79	77.62	9949.67	12.5667	1.20667	14153.3	1.87833	16.1333	3096.64	14	23.25	13	37.2698
Lianhuashan 1	17	1.676	22.5125	7.175	34.1667	519.948	31.7	10.7	21	28.1667	17.3167	28.1667	15.6333	2008	347	29	77.9556	1028	96	1028	108	293	80.65	10710	18.7667	1.77	951	82.6	16490	27.3667	2.96667	668	77.4	16241.7	26.6333	2.71	96	69.81	11587	17.3	1.34667	13757.2	2.19833	18.7667	2632.24	14	22.55	14	38.4264
Lianhuashan 2	748	1.28	19.7208	8.675	35.5533	596.914	30.9	6.5	24.4	26.2833	11.6333	26.2833	11.6333	1292	225	19	77.3141	672	75	672	75	177	76.89	12621	16.4667	1.29667	636	79.85	17530.3	25.5	2.43	395	78.77	16060.7	23.8333	2.17	84	76.35	9389	13.0667	1.03333	13900.2	1.7325	16.4667	3076	14	24.56	13	38.4264
Lianhuashan 3	17	1.484	22.2375	8.10833	34.5035	574.374	32.8	9.3	23.5	27.5167	16.5333	28.4667	14.6833	1730	289	32	68.5413	806	113	775	135	348	80.29	9652.67	18	1.66667	806	81.59	15789.7	27.4667	2.9	463	76.85	15922	26.8667	2.59667	113	70.41	10856	16.5	1.20667	13055.1	2.0925	18	2725.12	14	23.166	14	38.4264
Lianhuashan 4	2	1.537	22.3042	8.175	34.205	584.113	33.1	9.2	23.9	27.6833	16.4333	28.65	14.6	1769	294	33	67.7155	821	118	763	145	375	80.2	9654.67	18.1	1.66333	821	81.39	15542.3	27.6667	2.90667	455	76.73	15502.3	27	2.59333	118	70.68	10754.7	16.4333	1.2	12863.5	2.09083	18.1	2738.88	14	23.25	14	38.4264
Wutongshan 1	1108	1.359	18.4792	8.10833	37.7132	508.328	28.2	6.7	21.5	23.9333	11.5333	23.9333	11.5333	1454	297	16	88.2859	829	58	829	58	128	75.51	13310.7	16.1333	1.49333	702	80.32	17503.3	23.5667	2.52	545	81.09	15849.7	21.6	2.29333	79	77.62	9949.67	12.5667	1.20667	14153.3	1.87833	16.1333	3096.64	14	23.25	13	38.2876
[truncated: 2 more columns]

## Sheet: Table S8
Table S8 Genome-wide significant association signals of 51 environmental variables
Environmental variable	Chromosome	Position	Major allele	Minor allele	Minor allele frequency	P value(MLM)
Altitude	4	22075484	A	T	0.479167	5.2513e-12
Altitude	4	22321707	C	T	0.0204082	1.15828e-11
Altitude	8	6428495	G	A	0.0625	2.73489e-11
Altitude	6	28581092	C	A	0.012987	3.03454e-11
Altitude	6	25943850	G	A	0.142857	2.2616e-10
Altitude	2	21488455	T	G	0.0803571	2.61902e-10
Altitude	6	20010821	T	A	0.0487805	2.72786e-10
Altitude	2	10411999	C	A	0.0909091	7.52769e-10
Altitude	6	21232286	C	T	0.0714286	1.32207e-09
Altitude	3	16630657	C	T	0.0852273	1.92408e-09
Altitude	3	16630660	G	A	0.0842697	2.02114e-09
Altitude	1	20134117	C	T	0.0882353	2.52369e-09
Altitude	1	15607727	C	T	0.0588235	3.13604e-09
Altitude	6	28398006	G	A	0.00408163	6.74498e-09
Altitude	6	28941566	G	C	0.00257732	7.20371e-09
Altitude	2	9604683	G	A	0.0769231	7.21413e-09
Altitude	6	28941564	C	G	0.00259067	7.29036e-09
Altitude	3	16626046	T	C	0.0771429	8.37978e-09
Altitude	5	7408992	G	A	0.0638298	1.06737e-08
Altitude	4	20483186	G	A	0.0735294	1.18626e-08
Altitude	1	22712082	C	T	0.333333	1.43647e-08
Altitude	4	15670448	T	C	0.25	1.7586e-08
Altitude	6	5611908	T	G	0.1125	2.07046e-08
Altitude	2	11415536	C	T	0.0612245	2.32934e-08
Altitude	8	8303608	A	G	0.0429864	2.53467e-08
Altitude	6	23345395	G	C	0.425837	3.30351e-08
Altitude	5	4574666	C	T	0.089172	3.32092e-08
Altitude	6	23345412	G	A	0.40051	3.7024e-08
Altitude	8	18037419	T	A	0.177419	4.24439e-08
Altitude	5	7075040	A	G	0.170455	4.98979e-08
Altitude	7	6417164	C	T	0.0523256	5.51985e-08
Annual maximum temperature	2	11271620	A	G	0.070122	1.63415e-111
Annual maximum temperature	8	16881755	C	T	0.226316	3.34258e-102
Annual maximum temperature	7	21528863	A	G	0.398256	1.03377e-54
Annual maximum temperature	1	22840223	A	T	0.075	8.58343e-53
Annual maximum temperature	7	1481548	T	C	0.397516	1.08779e-38
Annual maximum temperature	7	8502557	C	T	0.0778302	1.22352e-26
Annual maximum temperature	6	9530952	A	G	0.0625	1.25799e-25
Annual maximum temperature	4	12986740	T	C	0.145652	1.02372e-20
Annual maximum temperature	4	4603041	A	G	0.395928	1.24507e-20
Annual maximum temperature	6	13747334	A	G	0.192469	3.92208e-19
Annual maximum temperature	4	23991093	A	G	0.422727	2.8014e-18
Annual maximum temperature	2	22084315	G	C	0.151786	1.09611e-16
Annual maximum temperature	2	11049057	C	T	0.259067	2.66256e-15
Annual maximum temperature	6	25495316	A	G	0.153659	3.62182e-14
Annual maximum temperature	6	14859350	T	A	0.0192308	8.99084e-14
Annual maximum temperature	4	22376099	G	A	0.328358	6.50705e-13
Annual maximum temperature	1	2145367	A	G	0.21822	1.46638e-12
Annual maximum temperature	1	15391484	G	A	0.0699482	9.38947e-11
Annual maximum temperature	5	5250438	C	T	0.197425	2.33577e-10
Annual maximum temperature	5	1592046	G	C	0.05	2.46909e-10
Annual maximum temperature	4	20220118	T	A	0.476695	2.93502e-10
Annual maximum temperature	6	10253164	C	T	0.0422535	2.97274e-10
Annual maximum temperature	3	12424179	A	C	0.0426357	4.06418e-10
Annual maximum temperature	2	22602323	C	T	0.182008	8.63386e-10
Annual maximum temperature	4	5803056	C	T	0.256696	1.21567e-09
Annual maximum temperature	1	2637063	C	G	0.102273	1.24392e-09
Annual maximum temperature	6	16483438	G	A	0.130597	1.5733e-09
Annual maximum temperature	6	14554600	A	G	0.221239	3.76743e-09
Annual maximum temperature	2	22838257	A	G	0.459052	4.7517e-09
Annual maximum temperature	5	4676559	A	G	0.2725	4.75174e-09
Annual maximum temperature	6	15024543	A	C	0.184211	5.37139e-09
Annual maximum temperature	2	16967477	G	T	0.339869	5.95298e-09
Annual maximum temperature	7	14257464	T	C	0.0526316	6.44414e-09
Annual maximum temperature	5	4844584	C	T	0.333333	8.30779e-09
Annual maximum temperature	2	22601748	T	G	0.204641	1.23422e-08
Annual maximum temperature	1	26291351	T	C	0.125767	1.292e-08
Annual maximum temperature	6	10664956	C	T	0.305419	1.35531e-08
Annual maximum temperature	2	22948214	T	C	0.174274	1.78454e-08
Annual maximum temperature	2	24332076	A	C	0.185106	1.96802e-08
Annual maximum temperature	1	17642613	T	A	0.0895833	2.40278e-08
Annual maximum temperature	1	17595694	C	A	0.169643	2.49758e-08
Annual maximum temperature	2	22876238	T	A	0.268443	2.66518e-08
Annual minimum temperature	6	10253164	C	T	0.0441176	2.97274e-10
Annual minimum temperature	2	22602323	C	T	0.227749	8.63386e-10
Annual minimum temperature	4	5803056	C	T	0.316092	1.21567e-09
Annual minimum temperature	2	22838257	A	G	0.342246	4.7517e-09
Annual minimum temperature	5	4676559	A	G	0.328125	4.75174e-09
Annual minimum temperature	2	16967477	G	T	0.471698	5.95298e-09
Annual solar radiation	7	2376886	C	T	0.475	1.91941e-07
Annual solar radiation	7	2376876	A	G	0.473913	2.19126e-07
Annual solar radiation	1	11456264	A	G	0.384091	2.56882e-07
Annual solar radiation	7	2356227	C	T	0.311927	4.28979e-07
Annual solar radiation	2	24339224	G	C	0.157143	4.38626e-07
Annual solar radiation	6	12094307	A	T	0.359259	8.70558e-07
Annual solar radiation	1	22017811	G	A	0.138756	1.01874e-06
Annual solar radiation	6	5429702	G	A	0.419872	1.03382e-06
Annual solar radiation	6	12094298	C	G	0.319079	1.18549e-06
Annual solar radiation	1	21774027	T	C	0.136816	1.35913e-06
Annual solar radiation	1	21437063	C	T	0.0906736	1.383e-06
Annual solar radiation	2	29006012	A	T	0.0578512	1.53704e-06
Annual solar radiation	6	12084504	T	A	0.475113	1.68733e-06
Annual solar radiation	2	22873027	C	T	0.083691	1.82218e-06
Annual solar radiation	1	46792975	G	T	0.299587	2.28588e-06
Annual solar radiation	4	4781960	G	T	0.259259	2.89523e-06
Annual solar radiation	6	4829510	T	C	0.302083	3.0157e-06
Annual solar radiation	1	21595544	T	C	0.153846	3.15288e-06
Annual solar radiation	1	27442708	G	C	0.2	3.19211e-06
Annual solar radiation	1	22348649	G	A	0.0434783	3.25644e-06
Annual solar radiation	3	15358275	C	T	0.0449438	3.26139e-06
Annual solar radiation	2	24285817	C	G	0.458549	3.28361e-06
Annual solar radiation	1	22348646	A	G	0.15493	3.416e-06
Annual solar radiation	3	15358282	G	T	0.043956	3.57842e-06
Annual solar radiation	2	26973591	A	T	0.0594262	3.69558e-06
Annual solar radiation	2	26888496	C	A	0.0420168	3.93291e-06
Annual solar radiation	4	2884148	T	G	0.423246	4.16404e-06
Annual solar radiation	1	21774030	A	T	0.104478	4.39031e-06
Annual solar radiation	1	21879404	T	A	0.151099	4.4922e-06
Annual solar radiation	6	4810242	T	A	0.134615	4.71141e-06
Annual solar radiation	3	14628844	C	T	0.163866	5.61947e-06
Annual solar radiation	6	5431812	G	A	0.413043	6.12169e-06
Annual solar radiation	7	2378213	A	G	0.338428	6.1369e-06
Annual solar radiation	2	27019003	C	G	0.08125	6.83517e-06
Annual solar radiation	1	46793394	T	C	0.369955	6.85801e-06
Annual solar radiation	6	30088354	A	G	0.165984	6.90868e-06
Annual solar radiation	2	27008584	T	C	0.0618557	7.65126e-06
Annual solar radiation	7	2356217	A	G	0.493056	7.66855e-06
Annual solar radiation	1	22017992	T	G	0.212121	7.68813e-06
Annual solar radiation	3	15739599	G	C	0.0966387	7.72546e-06
Annual solar radiation	4	2832790	T	G	0.297009	8.00969e-06
Annual solar radiation	4	2884845	C	T	0.462222	8.11175e-06
Annual solar radiation	8	14823518	G	C	0.357143	8.2537e-06
Annual solar radiation	7	2359259	T	C	0.455357	8.38936e-06
Annual solar radiation	2	10294065	A	C	0.0125628	8.44232e-06
Annual solar radiation	1	15050817	A	G	0.383475	8.61965e-06
Annual solar radiation	2	18039249	T	C	0.399573	8.86363e-06
Annual solar radiation	1	21801087	A	G	0.142077	8.91086e-06
Annual solar radiation	4	2884854	C	T	0.269058	9.25264e-06
Annual solar radiation	3	15256397	T	A	0.0380435	9.42122e-06
Annual solar radiation	1	21727108	T	C	0.166667	9.68925e-06
Annual solar radiation	6	4750342	A	G	0.155102	9.74221e-06
Annual solar radiation	2	24289134	C	T	0.225	9.8287e-06
Annual water vapor pressure	2	22838257	A	G	0.459052	3.75553e-09
Annual water vapor pressure	7	6523333	T	A	0.31893	1.36783e-08
Annual water vapor pressure	4	4206704	T	A	0.495708	1.72611e-08
Annual water vapor pressure	4	8173905	T	G	0.134855	1.87975e-08
Annual water vapor pressure	5	9982973	T	A	0.456522	3.23822e-08
Annual water vapor pressure	4	8162921	G	C	0.156118	3.39675e-08
Annual water vapor pressure	2	22661989	T	C	0.189873	4.81646e-08
Annual water vapor pressure	5	14382443	T	C	0.345992	5.04582e-08
Annual water vapor pressure	4	8162153	C	T	0.129167	9.16371e-08
Annual water vapor pressure	4	8162885	C	T	0.161702	1.07795e-07
Annual water vapor pressure	2	22692902	T	A	0.230932	1.33073e-07
Annual water vapor pressure	2	22690945	C	T	0.271186	1.43223e-07
Annual water vapor pressure	8	14031855	A	G	0.0430328	1.66275e-07
Annual water vapor pressure	8	14670033	A	G	0.0648536	1.90184e-07
Annual water vapor pressure	8	14782772	A	C	0.0619835	1.98224e-07
Annual water vapor pressure	4	8164384	C	T	0.297917	2.0789e-07
Annual water vapor pressure	5	14385079	G	A	0.470588	2.1294e-07
Annual water vapor pressure	4	8161837	G	A	0.123967	2.13466e-07
Annual water vapor pressure	8	14787096	G	A	0.0548523	2.30762e-07
Annual water vapor pressure	4	8163992	G	A	0.310345	2.53349e-07
Annual water vapor pressure	6	8000937	C	A	0.288973	2.81135e-07
Annual water vapor pressure	3	26692930	G	A	0.0897436	3.09806e-07
Annual water vapor pressure	8	14035745	A	C	0.0363248	3.45699e-07
Annual water vapor pressure	2	21895627	A	T	0.462	3.58131e-07
Annual water vapor pressure	7	6531877	G	A	0.352227	3.74082e-07
Annual water vapor pressure	8	14129642	G	A	0.0579399	4.36911e-07
Annual water vapor pressure	2	24332076	A	C	0.185106	4.40077e-07
Annual water vapor pressure	2	22619012	C	G	0.386047	4.42302e-07
Annual water vapor pressure	2	22601748	T	G	0.204641	4.55756e-07
Annual water vapor pressure	6	10664956	C	T	0.305419	4.61882e-07
Annual water vapor pressure	4	6604658	C	A	0.0504032	5.33985e-07
Annual water vapor pressure	3	10836416	G	A	0.0248963	6.52413e-07
Annual water vapor pressure	8	14668697	C	T	0.0783898	7.80495e-07
Annual water vapor pressure	4	8164689	C	A	0.135193	7.95883e-07
Annual water vapor pressure	3	26648924	C	A	0.0163934	8.26141e-07
Annual water vapor pressure	2	5468616	A	T	0.00669643	8.43428e-07
Annual water vapor pressure	6	5142421	G	A	0.309211	8.55649e-07
Annual water vapor pressure	2	22947009	A	G	0.442387	8.64836e-07
Annual water vapor pressure	6	5287518	A	C	0.077551	8.8047e-07
Annual water vapor pressure	8	14003518	C	A	0.0349794	9.01555e-07
Annual water vapor pressure	7	6499471	C	T	0.322176	9.12661e-07
Annual water vapor pressure	7	6483631	T	A	0.369266	9.12916e-07
Annual water vapor pressure	4	4277985	A	G	0.377232	9.20103e-07
Annual water vapor pressure	1	31208911	G	A	0.169767	9.37431e-07
Annual water vapor pressure	1	20891356	T	A	0.0325203	9.40406e-07
Annual water vapor pressure	2	22599812	C	A	0.268349	9.44921e-07
Annual water vapor pressure	4	4207687	C	T	0.444898	9.54321e-07
Annual water vapor pressure	2	6055902	T	C	0.00666667	9.64288e-07
Annual water vapor pressure	5	10352818	G	A	0.0808383	9.8084e-07
Annual water vapor pressure	2	6129057	C	T	0.0202703	9.92824e-07
Annual water vapor pressure	2	6042420	T	A	0.00643777	9.955e-07
Aridity	2	5825775	A	G	0.00877193	3.49571e-08
Aridity	4	6604658	C	A	0.0504032	4.89193e-08
Aridity	2	6129057	C	T	0.0202703	8.37413e-08
Aridity	2	5562607	G	C	0.00854701	1.41956e-07
Aridity	2	4774585	T	C	0.00847458	2.82297e-07
Aridity	2	5655632	C	T	0.00884956	3.30449e-07
Aridity	2	4774414	G	C	0.00884956	3.33906e-07
Aridity	2	7338240	T	A	0.108824	4.07268e-07
Aridity	4	5946720	G	A	0.0400844	5.49842e-07
Aridity	2	6523738	G	A	0.00854701	6.07329e-07
Aridity	2	4708655	A	G	0.00943396	7.15869e-07
Aridity	2	6499851	G	A	0.0110132	8.11016e-07
Aridity	2	5655660	G	A	0.01	8.67286e-07
Autumn air relative humidity	4	3009987	T	G	0.278302	8.03857e-12
Autumn air relative humidity	4	3211839	A	G	0.0720339	2.80314e-10
Autumn air relative humidity	4	3020305	C	T	0.176329	3.54546e-10
Autumn air relative humidity	8	14489374	A	G	0.335938	4.80901e-10
Autumn air relative humidity	4	3226695	C	T	0.185841	5.34291e-10
Autumn air relative humidity	4	2971566	A	C	0.2375	5.3905e-10
Autumn air relative humidity	4	3020311	T	A	0.126667	5.50026e-10
Autumn air relative humidity	4	2969055	A	G	0.242925	6.21101e-10
Autumn air relative humidity	4	3204442	A	G	0.276382	6.56397e-10
Autumn air relative humidity	4	3211896	A	C	0.216738	7.42271e-10
Autumn air relative humidity	4	3211913	T	A	0.229258	8.86219e-10
Autumn air relative humidity	4	3152563	T	C	0.267635	8.96924e-10
Autumn air relative humidity	4	3210459	T	A	0.240506	1.01573e-09
Autumn air relative humidity	4	3211852	G	C	0.240426	1.18366e-09
Autumn air relative humidity	4	3211880	G	A	0.21822	1.46146e-09
Autumn air relative humidity	7	15691487	G	A	0.0506073	1.71103e-09
Autumn air relative humidity	4	3177391	G	A	0.0840517	1.98886e-09
Autumn air relative humidity	4	3167155	A	G	0.24359	1.99339e-09
Autumn air relative humidity	4	2989627	G	T	0.08125	2.13789e-09
Autumn air relative humidity	4	3184414	T	G	0.0964912	2.70826e-09
Autumn air relative humidity	4	2969036	T	C	0.254505	4.50715e-09
Autumn air relative humidity	4	2969027	T	C	0.259174	4.52459e-09
Autumn air relative humidity	4	2989571	G	A	0.246725	4.61706e-09
Autumn air relative humidity	4	2972228	A	C	0.072314	5.24827e-09
Autumn air relative humidity	4	3204430	C	G	0.291667	5.52075e-09
Autumn air relative humidity	4	3239611	C	T	0.253165	5.52444e-09
Autumn air relative humidity	4	3191457	A	G	0.0962343	5.6963e-09
Autumn air relative humidity	4	3172973	C	G	0.0911017	7.08902e-09
Autumn air relative humidity	4	2989575	T	C	0.253363	7.29923e-09
Autumn air relative humidity	4	3236446	G	A	0.288018	8.33476e-09
Autumn air relative humidity	4	3167134	A	G	0.248918	8.45316e-09
Autumn air relative humidity	4	3205612	C	T	0.248869	8.61759e-09
Autumn air relative humidity	4	2989596	T	C	0.083691	9.0795e-09
Autumn air relative humidity	4	2989588	C	T	0.0840517	9.42809e-09
Autumn air relative humidity	4	3164678	T	A	0.264444	1.01226e-08
Autumn air relative humidity	4	3218863	T	C	0.0946502	1.02051e-08
Autumn air relative humidity	4	3175358	C	T	0.0969163	1.02798e-08
Autumn air relative humidity	4	3227375	T	C	0.140741	1.24736e-08
Autumn air relative humidity	4	2761043	T	C	0.0543478	1.28722e-08
Autumn air relative humidity	4	3167182	G	A	0.101523	1.31817e-08
Autumn air relative humidity	4	3164691	A	T	0.0957447	1.36811e-08
Autumn air relative humidity	4	3011970	G	A	0.103814	1.39786e-08
Autumn air relative humidity	4	3048472	G	C	0.146875	1.45312e-08
Autumn air relative humidity	4	3176628	A	G	0.116402	1.69626e-08
Autumn air relative humidity	4	3204481	A	G	0.280952	1.88151e-08
Autumn air relative humidity	4	3221280	G	A	0.118919	1.92045e-08
Autumn air relative humidity	7	15692034	T	C	0.0640244	1.94348e-08
Autumn air relative humidity	4	3208434	C	T	0.269068	1.94567e-08
Autumn air relative humidity	4	3055701	A	G	0.26009	2.08203e-08
Autumn air relative humidity	8	14461345	G	A	0.179803	2.13663e-08
Autumn air relative humidity	4	3157233	C	T	0.0965665	2.61279e-08
Autumn air relative humidity	4	3044122	A	G	0.110837	2.70585e-08
Autumn air relative humidity	4	3275173	C	A	0.278894	2.71705e-08
Autumn air relative humidity	4	3167140	G	C	0.087234	2.99581e-08
Autumn air relative humidity	4	3162972	A	C	0.257778	3.14901e-08
Autumn air relative humidity	7	15691991	G	A	0.0566038	3.35735e-08
Autumn air relative humidity	4	3191470	A	T	0.0925926	3.38558e-08
Autumn air relative humidity	4	2989555	G	C	0.257576	3.42823e-08
Autumn air relative humidity	4	3181795	G	A	0.09375	3.76768e-08
Autumn precipitation	3	26692930	G	A	0.0897436	3.28676e-10
Autumn precipitation	8	14670033	A	G	0.0648536	5.4676e-10
Autumn precipitation	8	14031855	A	G	0.0430328	9.93075e-10
Autumn precipitation	7	7549191	C	T	0.0314465	2.0982e-09
Autumn precipitation	8	14003518	C	A	0.0349794	3.49671e-09
Autumn precipitation	8	14837688	A	G	0.0450644	3.52914e-09
Autumn precipitation	1	27506610	G	T	0.0222222	4.05519e-09
Autumn precipitation	3	26373495	A	G	0.0188285	4.16454e-09
Autumn precipitation	3	26648924	C	A	0.0163934	4.24695e-09
Autumn precipitation	8	14895250	A	G	0.0471311	4.66207e-09
Autumn precipitation	8	14698765	G	A	0.119863	4.68679e-09
Autumn precipitation	2	5033273	G	A	0.0112108	5.73505e-09
Autumn precipitation	8	14795007	G	A	0.0460251	6.12035e-09
Autumn precipitation	3	26428211	C	G	0.0217391	6.75726e-09
Autumn precipitation	1	27505075	G	A	0.0204918	7.07096e-09
Autumn precipitation	5	4389289	C	A	0.0233645	7.09591e-09
Autumn precipitation	1	27561318	G	A	0.0204918	7.92374e-09
Autumn precipitation	1	27553937	C	T	0.0276243	8.09266e-09
Autumn precipitation	8	14668697	C	T	0.0783898	8.21991e-09
Autumn precipitation	1	27504158	G	T	0.0214592	8.48792e-09
Autumn precipitation	8	14782772	A	C	0.0619835	8.87165e-09
Autumn precipitation	1	27494504	C	T	0.0208333	8.88369e-09
Autumn precipitation	4	2582769	C	T	0.0228216	9.97265e-09
Autumn precipitation	8	14801835	G	A	0.0479167	1.00047e-08
Autumn precipitation	5	4359001	G	T	0.0207469	1.04291e-08
Autumn precipitation	7	6332387	C	G	0.0095057	1.06498e-08
Autumn precipitation	7	6776528	C	T	0.0103734	1.09038e-08
Autumn precipitation	2	5468616	A	T	0.00669643	1.14931e-08
Autumn precipitation	7	5659591	G	C	0.0109649	1.17299e-08
Autumn precipitation	1	27513198	A	T	0.0205761	1.19708e-08
Autumn precipitation	5	4256253	C	T	0.0202429	1.22447e-08
Autumn precipitation	3	2731593	G	C	0.018595	1.32637e-08
Autumn precipitation	1	27859788	T	C	0.021097	1.33306e-08
Autumn precipitation	2	6055902	T	C	0.00666667	1.41108e-08
Autumn precipitation	2	6129057	C	T	0.0202703	1.41131e-08
Autumn precipitation	8	14114906	A	C	0.0725	1.41849e-08
Autumn precipitation	7	14665268	A	C	0.0361446	1.44095e-08
Autumn precipitation	2	5519940	A	G	0.00609756	1.46244e-08
Autumn precipitation	5	4500788	G	A	0.0213675	1.51862e-08
Autumn precipitation	2	5519943	A	G	0.00612245	1.53289e-08
Autumn precipitation	1	44028613	C	A	0.0349345	1.57605e-08
Autumn precipitation	2	5144479	C	T	0.00717703	1.58184e-08
Autumn precipitation	2	7121092	G	C	0.00652174	1.62182e-08
Autumn precipitation	8	14794201	T	C	0.0539419	1.62722e-08
Autumn precipitation	2	5760694	G	A	0.00632911	1.68228e-08
Autumn precipitation	5	7926222	C	T	0.0217391	1.70359e-08
Autumn precipitation	2	7199710	C	T	0.00588235	1.7323e-08
Autumn precipitation	8	14233484	G	T	0.0360169	1.75669e-08
Autumn precipitation	5	4292000	G	A	0.0212766	1.78233e-08
Autumn precipitation	8	14793826	G	C	0.0502092	1.81165e-08
Autumn precipitation	2	5519958	T	A	0.00609756	1.81278e-08
Autumn precipitation	5	4293603	C	T	0.0238095	1.85804e-08
Autumn precipitation	1	27505918	C	T	0.0212766	1.91696e-08
Autumn precipitation	8	14035745	A	C	0.0363248	1.925e-08
Autumn precipitation	2	5104038	T	G	0.00627615	1.93188e-08
Autumn precipitation	2	6042420	T	A	0.00643777	1.95073e-08
Autumn precipitation	2	5510156	T	G	0.00657895	2.0425e-08
Autumn precipitation	3	10836416	G	A	0.0248963	2.08845e-08
Autumn precipitation	5	14138938	C	A	0.0361702	2.15444e-08
Autumn precipitation	3	26696486	T	C	0.0168776	2.26832e-08
Autumn precipitation	3	26608660	T	C	0.0158371	2.26941e-08
Autumn precipitation	2	13607668	A	G	0.0116732	2.3778e-08
Autumn precipitation	7	14667731	A	G	0.0362903	2.39255e-08
Autumn precipitation	1	27785556	G	A	0.026178	2.41145e-08
Autumn precipitation	8	14117657	A	T	0.0611814	2.52004e-08
Autumn precipitation	2	7119333	G	A	0.00694444	2.57353e-08
Autumn precipitation	1	38435078	A	T	0.022449	2.60118e-08
Autumn precipitation	1	38489769	T	A	0.0717213	2.67346e-08
Autumn precipitation	1	27508487	C	T	0.0876289	2.81064e-08
Autumn precipitation	2	5238013	C	T	0.00881057	2.90008e-08
Autumn precipitation	8	14129642	G	A	0.0579399	2.94332e-08
Autumn precipitation	1	43845859	C	G	0.0105485	2.98034e-08
Autumn precipitation	1	43784356	A	G	0.0107296	3.03614e-08
Autumn precipitation	1	34013757	A	G	0.0366972	3.09695e-08
Autumn precipitation	2	5498468	T	A	0.00823045	3.46085e-08
Autumn precipitation	8	1451992	T	G	0.0163399	3.67126e-08
Autumn precipitation	1	34832694	T	G	0.0103306	3.68608e-08
Autumn precipitation	8	13998499	G	C	0.0142857	3.72631e-08
Autumn precipitation	1	34349517	A	T	0.0109649	3.73162e-08
Autumn solar radiation	4	3211896	A	C	0.216738	3.94064e-09
Autumn solar radiation	4	3211839	A	G	0.0720339	4.1513e-09
Autumn solar radiation	4	3211880	G	A	0.21822	4.17313e-09
Autumn solar radiation	7	15692034	T	C	0.0640244	6.81637e-09
Autumn solar radiation	4	3211852	G	C	0.240426	7.2396e-09
Autumn solar radiation	4	3211913	T	A	0.229258	1.00072e-08
Autumn solar radiation	2	29006012	A	T	0.0578512	1.1326e-08
Autumn solar radiation	4	3020311	T	A	0.126667	1.42827e-08
Autumn solar radiation	4	3020305	C	T	0.176329	1.49772e-08
Autumn solar radiation	4	3210459	T	A	0.240506	2.01953e-08
Autumn solar radiation	4	2989627	G	T	0.08125	2.13983e-08
Autumn solar radiation	7	15691487	G	A	0.0506073	3.24008e-08
Autumn solar radiation	4	3177391	G	A	0.0840517	3.70873e-08
Autumn temperature	1	41766869	A	C	0.133929	3.89182e-10
Autumn temperature	2	10611684	A	G	0.00483092	4.29484e-10
Autumn temperature	6	16079096	G	A	0.00540541	5.8822e-10
Autumn temperature	4	24882368	A	T	0.00612245	6.89764e-10
Autumn temperature	2	13286739	G	A	0.00865801	7.48453e-10
Autumn temperature	7	4524109	G	A	0.0097561	8.75791e-10
Autumn temperature	2	27277319	C	T	0.0105042	1.15779e-09
Autumn temperature	3	17912134	A	G	0.00537634	1.40082e-09
Autumn temperature	6	28355298	G	A	0.0111607	2.13411e-09
Autumn temperature	4	23131743	A	T	0.0606061	3.37295e-09
Autumn temperature	2	15533072	C	T	0.00920245	4.92708e-09
Autumn temperature	2	7556834	G	T	0.0714286	5.64472e-09
Autumn temperature	3	18908503	A	G	0.00694444	6.87777e-09
Autumn temperature	2	16036692	G	T	0.00728155	7.27959e-09
Autumn temperature	4	23131740	A	G	0.0512821	7.47621e-09
Autumn temperature	3	11446956	C	T	0.0338164	8.58017e-09
Autumn temperature	2	11922027	G	A	0.00641026	8.61969e-09
Autumn temperature	3	11440444	A	G	0.155779	8.66153e-09
Autumn temperature	3	11438092	A	G	0.038961	8.69642e-09
Autumn temperature	3	18318178	G	A	0.00717703	9.12049e-09
Autumn temperature	6	8156427	G	A	0.0114504	1.04299e-08
Autumn temperature	3	18644870	A	G	0.00993377	1.05593e-08
Autumn temperature	3	11388089	A	T	0.179907	1.10871e-08
Autumn temperature	2	14083738	G	T	0.00681818	1.11134e-08
Autumn temperature	3	11440472	A	C	0.124402	1.13848e-08
Autumn temperature	3	11438080	T	A	0.0391304	1.18304e-08
Autumn temperature	7	3957403	A	G	0.007109	1.19374e-08
Autumn temperature	1	9761668	T	A	0.025	1.21881e-08
Autumn temperature	2	14166562	C	T	0.00657895	1.25562e-08
Autumn temperature	6	16780292	C	T	0.0127389	1.31903e-08
Autumn temperature	8	13494597	G	A	0.00854701	1.45196e-08
Autumn temperature	3	11438842	A	G	0.0563725	1.48631e-08
Autumn temperature	1	9761672	T	C	0.025641	1.57888e-08
Autumn temperature	7	1351006	A	T	0.00675676	1.707e-08
Autumn temperature	3	11434261	A	G	0.0434783	1.77877e-08
Autumn temperature	2	11415536	C	T	0.0612245	2.01789e-08
Autumn temperature	3	11441241	A	C	0.0502646	2.11606e-08
Autumn temperature	3	11441307	A	G	0.0482456	2.18433e-08
Autumn temperature	8	13494607	T	G	0.0213675	2.27134e-08
Autumn temperature	3	11324670	G	A	0.0625	2.41585e-08
Autumn temperature	3	11439424	T	G	0.211111	2.82365e-08
Autumn temperature	3	11439412	G	A	0.223451	3.22262e-08
Autumn temperature	1	3610098	A	T	0.0387324	3.45265e-08
Autumn temperature	3	11408824	A	T	0.0491071	3.48003e-08
Autumn temperature	7	3106904	A	G	0.0272109	3.59205e-08
Autumn temperature	4	4157749	C	T	0.0204918	3.68547e-08
Autumn water vapor pressure	4	3009987	T	G	0.278302	7.02638e-11
Autumn water vapor pressure	2	20054249	A	G	0.248963	6.48661e-10
Autumn water vapor pressure	4	4206704	T	A	0.495708	8.1743e-10
Autumn water vapor pressure	5	9982973	T	A	0.456522	4.46983e-09
Autumn water vapor pressure	4	3196653	G	A	0.246667	6.48683e-09
Autumn water vapor pressure	4	8163992	G	A	0.310345	6.91619e-09
Autumn water vapor pressure	4	2989575	T	C	0.253363	1.29087e-08
Autumn water vapor pressure	4	2989571	G	A	0.246725	1.32295e-08
Autumn water vapor pressure	4	3125179	C	T	0.0927602	1.45194e-08
Autumn water vapor pressure	4	3048472	G	C	0.146875	1.71064e-08
Autumn water vapor pressure	4	8162921	G	C	0.156118	2.02159e-08
Autumn water vapor pressure	4	8173905	T	G	0.134855	2.13911e-08
Autumn water vapor pressure	4	3204430	C	G	0.291667	2.30364e-08
Autumn water vapor pressure	4	3204442	A	G	0.276382	2.33424e-08
Autumn water vapor pressure	2	21893929	G	T	0.27572	2.3856e-08
Autumn water vapor pressure	4	2971566	A	C	0.2375	2.73198e-08
Autumn water vapor pressure	4	3152563	T	C	0.267635	2.93477e-08
Autumn water vapor pressure	4	3134537	A	C	0.387712	3.34253e-08
bio1	2	13286739	G	A	0.00865801	5.32443e-11
bio1	7	4524109	G	A	0.0097561	7.49062e-11
bio1	3	17912134	A	G	0.00537634	8.99382e-11
bio1	4	23131743	A	T	0.0606061	5.22871e-10
bio1	7	3106904	A	G	0.0272109	5.55544e-10
bio1	4	23131740	A	G	0.0512821	7.56105e-10
bio1	3	18908503	A	G	0.00694444	8.63942e-10
bio1	2	16036692	G	T	0.00728155	9.10072e-10
bio1	6	8156427	G	A	0.0114504	1.11635e-09
bio1	2	11922027	G	A	0.00641026	1.26282e-09
bio1	3	18318178	G	A	0.00717703	1.26324e-09
bio1	3	18644870	A	G	0.00993377	1.36463e-09
bio1	2	14083738	G	T	0.00681818	1.4404e-09
bio1	2	14166562	C	T	0.00657895	1.56736e-09
bio1	7	3957403	A	G	0.007109	1.61615e-09
bio1	1	9761668	T	A	0.025	1.85009e-09
bio1	2	27277319	C	T	0.0105042	2.22204e-09
bio1	1	9761672	T	C	0.025641	2.50698e-09
bio1	3	11440444	A	G	0.155779	2.80471e-09
bio1	6	28355298	G	A	0.0111607	4.02266e-09
bio1	7	2984901	A	G	0.00819672	4.21607e-09
bio1	3	11440472	A	C	0.124402	4.62844e-09
bio1	7	2984904	G	A	0.00842697	5.42658e-09
bio1	3	11388089	A	T	0.179907	7.12628e-09
bio1	1	41766869	A	C	0.133929	9.66045e-09
bio1	2	10611684	A	G	0.00483092	1.00985e-08
bio1	6	16079096	G	A	0.00540541	1.30016e-08
bio1	3	11441307	A	G	0.0482456	1.30788e-08
bio1	6	17688880	G	A	0.0463918	1.5101e-08
bio1	3	4815083	T	C	0.00858369	1.51656e-08
bio1	3	11446956	C	T	0.0338164	1.73299e-08
bio1	4	4157749	C	T	0.0204918	1.82548e-08
bio1	8	5161265	C	T	0.0290698	1.8336e-08
bio1	3	11438092	A	G	0.038961	2.06608e-08
bio1	4	22006548	T	G	0.176471	2.2605e-08
bio1	2	15533072	C	T	0.00920245	2.53594e-08
bio1	4	4179458	C	A	0.0240175	2.60653e-08
bio1	3	11438080	T	A	0.0391304	3.07241e-08
bio1	8	5161091	G	A	0.0290698	3.15721e-08
bio1	1	4171847	T	C	0.00628931	3.22278e-08
bio1	3	11438842	A	G	0.0563725	3.35091e-08
bio1	3	11407590	C	T	0.0338346	3.36067e-08
bio1	3	11439424	T	G	0.211111	3.42061e-08
bio1	7	5658007	G	A	0.0636364	3.67545e-08
bio1	8	5161332	G	A	0.0292398	3.69e-08
bio10	4	24882368	A	T	0.00612245	1.63618e-13
bio10	2	10611684	A	G	0.00483092	2.30535e-12
bio10	1	41766869	A	C	0.133929	2.90797e-12
bio10	7	4524109	G	A	0.0097561	3.22773e-12
bio10	2	13286739	G	A	0.00865801	3.31715e-12
bio10	6	16780292	C	T	0.0127389	4.11683e-12
bio10	6	16079096	G	A	0.00540541	4.63998e-12
bio10	2	27277319	C	T	0.0105042	7.04664e-12
bio10	3	17912134	A	G	0.00537634	7.93097e-12
bio10	6	28355298	G	A	0.0111607	9.83648e-12
bio10	4	23131743	A	T	0.0606061	4.97552e-11
bio10	3	18908503	A	G	0.00694444	5.94783e-11
bio10	3	11388089	A	T	0.179907	6.37825e-11
bio10	2	16036692	G	T	0.00728155	7.68453e-11
bio10	3	18318178	G	A	0.00717703	8.64581e-11
bio10	1	9761668	T	A	0.025	9.12799e-11
bio10	2	11922027	G	A	0.00641026	9.14704e-11
bio10	3	18644870	A	G	0.00993377	1.00867e-10
bio10	2	14083738	G	T	0.00681818	1.16592e-10
bio10	2	14166562	C	T	0.00657895	1.2219e-10
bio10	1	9761672	T	C	0.025641	1.27161e-10
bio10	7	3957403	A	G	0.007109	1.37952e-10
bio10	2	13615437	C	T	0.0418994	1.44551e-10
bio10	6	8156427	G	A	0.0114504	1.59178e-10
bio10	4	23131740	A	G	0.0512821	1.68557e-10
bio10	3	11440444	A	G	0.155779	1.68766e-10
bio10	4	4157749	C	T	0.0204918	2.15251e-10
bio10	7	3106904	A	G	0.0272109	2.24086e-10
bio10	4	4189493	T	G	0.025	2.31587e-10
bio10	6	16779912	G	T	0.164179	2.47466e-10
bio10	3	11438092	A	G	0.038961	2.63406e-10
bio10	3	11440472	A	C	0.124402	3.03261e-10
bio10	4	4179458	C	A	0.0240175	3.09768e-10
bio10	2	11415536	C	T	0.0612245	3.23082e-10
bio10	3	11438080	T	A	0.0391304	3.24382e-10
bio10	6	28318543	A	G	0.0482955	3.75249e-10
bio10	8	13494597	G	A	0.00854701	3.77054e-10
bio10	6	28287465	T	C	0.106952	3.92854e-10
bio10	3	11446956	C	T	0.0338164	4.65031e-10
bio10	7	1351006	A	T	0.00675676	5.10893e-10
bio10	5	18439449	T	G	0.01	6.16558e-10
bio10	3	11438842	A	G	0.0563725	6.35007e-10
bio10	3	11324670	G	A	0.0625	6.60268e-10
bio10	2	7556834	G	T	0.0714286	7.08881e-10
bio10	3	11434261	A	G	0.0434783	7.12778e-10
bio10	2	15533072	C	T	0.00920245	7.34474e-10
bio10	3	11769416	T	A	0.00643777	1.11321e-09
bio10	3	11769406	A	T	0.00646552	1.13536e-09
bio10	1	4172108	G	A	0.00806452	1.36122e-09
bio10	3	11441241	A	C	0.0502646	1.3929e-09
bio10	2	23437382	G	C	0.00574713	1.50057e-09
bio10	3	11441307	A	G	0.0482456	1.53014e-09
bio10	1	4171847	T	C	0.00628931	1.70839e-09
bio10	8	9606519	A	G	0.00403226	1.83811e-09
bio10	3	11441398	G	A	0.0538462	1.87241e-09
bio10	2	611887	T	C	0.146766	2.26993e-09
bio10	3	11408824	A	T	0.0491071	2.30984e-09
bio10	6	16779983	G	T	0.0723684	2.95535e-09
bio10	2	7556859	C	A	0.0691489	3.05871e-09
bio10	3	11407857	A	C	0.0529412	3.27829e-09
bio10	3	11407590	C	T	0.0338346	3.3705e-09
bio10	3	11415775	G	A	0.0753012	3.48634e-09
bio10	1	18828567	C	T	0.00588235	4.67283e-09
bio10	3	11411156	T	C	0.0701754	4.94184e-09
bio10	8	13494607	T	G	0.0213675	5.00562e-09
bio10	2	11042534	C	A	0.0365854	5.68128e-09
bio10	6	28317099	G	C	0.0359477	5.78139e-09
bio10	2	11473920	G	T	0.0283019	5.89171e-09
bio10	3	4815083	T	C	0.00858369	5.92991e-09
bio10	3	11440332	C	T	0.0495283	6.14232e-09
bio10	6	17688880	G	A	0.0463918	6.3563e-09
bio10	4	22006548	T	G	0.176471	6.62869e-09
bio10	7	2312376	A	T	0.00657895	6.67752e-09
bio10	8	7401843	A	G	0.00598802	6.79155e-09
bio10	1	47088200	A	G	0.0163934	6.81423e-09
bio10	3	11416913	C	T	0.0688776	7.37041e-09
bio10	1	4826522	C	T	0.0310881	7.41649e-09
bio10	8	5161265	C	T	0.0290698	8.18309e-09
bio10	1	3610098	A	T	0.0387324	8.43856e-09
bio10	1	4171833	T	C	0.0121951	8.87829e-09
bio10	8	5161332	G	A	0.0292398	9.78642e-09
bio10	3	11416256	T	C	0.0611111	1.0086e-08
bio10	3	11408494	G	A	0.0506608	1.08044e-08
bio10	3	11426244	G	A	0.0495283	1.09078e-08
bio10	1	33574558	G	A	0.0253165	1.16508e-08
bio10	6	17551140	A	T	0.0113636	1.19115e-08
bio10	3	11439424	T	G	0.211111	1.19226e-08
bio10	8	5161091	G	A	0.0290698	1.25256e-08
bio10	6	25950626	T	A	0.0131579	1.27496e-08
bio10	3	11405549	T	C	0.0363636	1.32692e-08
bio10	1	33574559	T	A	0.0251572	1.37813e-08
bio10	3	17215094	G	A	0.00952381	1.38097e-08
bio10	2	14732111	G	A	0.03125	1.39301e-08
bio10	2	7497154	A	G	0.0395683	1.41327e-08
bio10	6	2584227	A	T	0.333333	1.45217e-08
bio10	4	3552553	C	A	0.0106952	1.50132e-08
bio10	6	28251176	A	G	0.219444	1.56387e-08
bio10	6	28269443	A	G	0.0714286	1.59492e-08
bio10	8	5161113	C	T	0.0301205	1.61657e-08
bio10	3	11440915	A	G	0.0717822	1.65397e-08
bio10	3	11418258	C	T	0.0767045	1.6662e-08
bio10	3	11439412	G	A	0.223451	1.69188e-08
bio10	8	5161120	G	A	0.0364964	1.69987e-08
bio10	3	11417627	G	A	0.0702247	1.70493e-08
bio10	6	28251066	A	G	0.187166	1.87138e-08
bio10	3	8113590	G	A	0.0128866	1.95102e-08
bio10	8	5161087	T	C	0.0373134	2.08284e-08
bio10	3	11440841	C	T	0.0514706	2.10418e-08
bio10	3	11440910	T	C	0.0454545	2.16459e-08
bio10	2	29421775	C	G	0.00943396	2.26851e-08
bio10	8	1899272	A	C	0.131944	2.28479e-08
bio10	5	13081025	G	A	0.00884956	2.30197e-08
bio10	1	25439736	A	C	0.0122699	2.37712e-08
bio10	8	15852437	T	A	0.00595238	2.42592e-08
bio10	5	1273983	G	T	0.188889	2.51757e-08
bio10	2	16014276	G	A	0.0107527	2.53441e-08
bio10	5	13089517	G	A	0.00966184	2.53594e-08
bio10	8	1900130	T	C	0.0138889	2.56205e-08
bio10	2	6638720	A	G	0.136076	2.56516e-08
bio10	1	14440717	C	T	0.147887	2.61296e-08
bio10	4	6634145	A	G	0.0294118	2.64595e-08
bio10	3	11441159	A	C	0.0486111	2.70381e-08
bio10	2	6817068	A	G	0.0201342	2.71323e-08
bio10	3	16427817	G	A	0.0083682	2.72575e-08
bio10	8	6989099	G	A	0.0142857	2.82154e-08
bio10	3	20897772	G	A	0.00826446	2.91393e-08
bio10	3	16515554	C	T	0.0116279	2.92433e-08
bio10	3	16426016	G	A	0.0103627	2.93835e-08
bio10	2	6556667	C	T	0.00444444	2.96945e-08
bio10	2	30397220	A	G	0.0214286	3.01072e-08
bio10	1	898077	C	T	0.00413223	3.05044e-08
bio10	8	1900108	T	C	0.0135135	3.05851e-08
bio10	3	11264935	A	C	0.0148515	3.06217e-08
bio10	4	4042162	G	C	0.00469484	3.06862e-08
bio10	2	5731691	G	A	0.00429185	3.09062e-08
bio10	2	6555500	A	G	0.00558659	3.0911e-08
bio10	6	28317069	T	A	0.0382166	3.09567e-08
bio10	3	16428057	C	T	0.00847458	3.11628e-08
bio10	3	16435080	C	T	0.00809717	3.13604e-08
bio10	2	6639441	C	T	0.130872	3.18371e-08
bio10	3	16577100	C	T	0.0127389	3.18937e-08
bio10	1	1544066	G	A	0.00409836	3.20081e-08
bio10	6	28226259	G	T	0.0297297	3.21234e-08
bio10	1	40159124	G	C	0.175847	3.21421e-08
bio10	1	41294271	G	A	0.00529101	3.23713e-08
bio10	3	12057231	G	T	0.011236	3.24222e-08
bio10	2	6639445	A	C	0.130872	3.24424e-08
bio10	3	16470119	A	G	0.179012	3.24739e-08
bio10	6	28354772	G	A	0.106599	3.25937e-08
bio10	3	16416091	C	T	0.17551	3.27467e-08
bio10	3	3518533	C	T	0.00851064	3.28113e-08
bio10	3	16433516	G	A	0.00888889	3.28154e-08
bio10	1	46234815	C	A	0.0042735	3.3031e-08
bio10	8	18688875	A	G	0.0448718	3.30856e-08
bio10	3	16438879	A	T	0.00956938	3.36214e-08
bio10	1	569864	T	C	0.00413223	3.36517e-08
bio10	3	16438890	G	A	0.00938967	3.38035e-08
bio10	2	6633251	T	C	0.0326087	3.3865e-08
bio10	8	3826694	A	G	0.00793651	3.39365e-08
bio10	3	16429423	C	T	0.00956938	3.3946e-08
bio10	8	16134524	A	G	0.037037	3.40777e-08
bio10	1	6309559	C	T	0.00398406	3.42119e-08
bio10	2	7156060	G	A	0.00425532	3.44039e-08
bio10	7	7844876	G	A	0.00980392	3.46611e-08
bio10	3	16430679	C	T	0.0104167	3.47814e-08
bio10	1	4691305	G	A	0.00873362	3.49503e-08
bio10	3	16401190	C	G	0.00858369	3.50152e-08
bio10	3	16460775	A	G	0.00854701	3.52756e-08
bio10	8	1834969	T	C	0.00952381	3.53313e-08
bio10	1	4740290	G	A	0.00454545	3.55347e-08
bio10	5	14880632	A	T	0.0083682	3.55706e-08
bio10	6	7546226	T	G	0.0179641	3.56311e-08
bio10	3	16435855	A	T	0.00847458	3.56472e-08
bio10	5	14694476	C	T	0.00829876	3.57402e-08
bio10	8	1899511	G	C	0.0129032	3.58509e-08
bio10	3	14610786	G	A	0.012987	3.59761e-08
bio10	8	1900095	A	G	0.0139535	3.62437e-08
bio10	1	6304802	C	T	0.0044843	3.62695e-08
bio10	3	16435881	G	A	0.00881057	3.62801e-08
bio10	1	20664798	G	C	0.0136612	3.66572e-08
bio10	2	6639380	T	C	0.0137931	3.66718e-08
bio10	4	22991891	T	C	0.00869565	3.68762e-08
bio10	2	6370041	A	G	0.00549451	3.69394e-08
bio10	2	7428494	C	T	0.214286	3.70238e-08
bio10	3	16468391	C	T	0.176349	3.71333e-08
bio10	3	15980638	T	C	0.010929	3.71906e-08
bio10	1	434144	C	T	0.03125	3.73425e-08
bio10	5	13063904	T	G	0.0115207	3.73664e-08
bio10	8	13216010	G	C	0.0125	3.73799e-08
bio10	8	1767910	A	C	0.00900901	3.75608e-08
bio10	6	28317746	C	T	0.01875	3.78287e-08
bio10	5	13091147	T	C	0.0108108	3.78962e-08
bio11	3	4054104	A	T	0.032	2.53125e-09
bio11	4	4206704	T	A	0.495708	3.60993e-09
bio11	2	22602323	C	T	0.182008	5.71065e-09
bio11	2	22601748	T	G	0.204641	5.80889e-09
bio11	2	22838257	A	G	0.459052	6.78176e-09
bio11	5	14385079	G	A	0.470588	1.54312e-08
bio11	6	19650921	T	C	0.309735	2.16676e-08
bio11	5	14382443	T	C	0.345992	2.72009e-08
bio12	8	14031855	A	G	0.0430328	3.40848e-10
bio12	2	5468616	A	T	0.00669643	4.3912e-10
bio12	2	6055902	T	C	0.00666667	4.64827e-10
bio12	3	2588902	C	T	0.029148	4.6564e-10
bio12	2	6129057	C	T	0.0202703	5.33024e-10
bio12	2	5519940	A	G	0.00609756	5.82102e-10
bio12	2	5519943	A	G	0.00612245	6.15752e-10
bio12	2	5144479	C	T	0.00717703	6.17899e-10
bio12	2	5760694	G	A	0.00632911	6.24872e-10
bio12	2	5519958	T	A	0.00609756	6.35493e-10
bio12	2	7199710	C	T	0.00588235	6.48804e-10
bio12	2	6042420	T	A	0.00643777	6.81654e-10
bio12	2	7121092	G	C	0.00652174	6.84707e-10
bio12	2	5510156	T	G	0.00657895	8.27147e-10
bio12	8	14670033	A	G	0.0648536	8.85975e-10
bio12	2	5104038	T	G	0.00627615	8.8652e-10
bio12	2	7119333	G	A	0.00694444	9.33654e-10
bio12	2	5033273	G	A	0.0112108	9.39894e-10
bio12	2	13607668	A	G	0.0116732	9.84276e-10
bio12	8	14003518	C	A	0.0349794	1.25519e-09
bio12	3	26692930	G	A	0.0897436	1.61061e-09
bio12	2	5309425	C	T	0.0107759	1.8279e-09
bio12	2	5309445	G	A	0.0108696	1.92975e-09
bio12	2	5309421	G	T	0.0108696	1.92998e-09
bio12	8	14698765	G	A	0.119863	2.24226e-09
bio12	2	5238013	C	T	0.00881057	3.18548e-09
bio12	3	10836416	G	A	0.0248963	3.78374e-09
bio12	2	5498468	T	A	0.00823045	3.90748e-09
bio12	7	14665268	A	C	0.0361446	4.59115e-09
bio12	3	26648924	C	A	0.0163934	5.16266e-09
bio12	2	4708655	A	G	0.00943396	5.569e-09
bio12	2	5825775	A	G	0.00877193	6.26414e-09
bio12	8	14668697	C	T	0.0783898	6.54516e-09
bio12	3	26373495	A	G	0.0188285	6.62218e-09
bio12	2	22838257	A	G	0.459052	7.01555e-09
bio12	1	27506610	G	T	0.0222222	7.56447e-09
bio12	2	5655632	C	T	0.00884956	7.82411e-09
bio12	8	14035745	A	C	0.0363248	8.12545e-09
bio12	2	5562607	G	C	0.00854701	8.21037e-09
bio12	2	6523738	G	A	0.00854701	8.40206e-09
bio12	2	5655660	G	A	0.01	9.53853e-09
bio12	2	4774414	G	C	0.00884956	1.03719e-08
bio12	8	13998499	G	C	0.0142857	1.04871e-08
bio12	2	6776916	A	G	0.0083682	1.06553e-08
bio12	2	4774585	T	C	0.00847458	1.09997e-08
bio12	3	26696486	T	C	0.0168776	1.19591e-08
bio12	8	1268857	C	T	0.0104712	1.26336e-08
bio12	1	27505075	G	A	0.0204918	1.32045e-08
bio12	1	27553937	C	T	0.0276243	1.36677e-08
bio12	5	4389289	C	A	0.0233645	1.38912e-08
bio12	1	27561318	G	A	0.0204918	1.47185e-08
bio12	8	14782772	A	C	0.0619835	1.4739e-08
bio12	2	6155795	C	T	0.0118483	1.48139e-08
bio12	5	14138938	C	A	0.0361702	1.53687e-08
bio12	1	44028613	C	A	0.0349345	1.5416e-08
bio12	1	27504158	G	T	0.0214592	1.62411e-08
bio12	7	14667731	A	G	0.0362903	1.77215e-08
bio12	1	27508487	C	T	0.0876289	1.87647e-08
bio12	3	2731593	G	C	0.018595	1.88667e-08
bio12	4	6391928	A	G	0.0493827	1.92945e-08
bio12	2	22653948	C	T	0.166667	1.94743e-08
bio12	1	27494504	C	T	0.0208333	2.00447e-08
bio12	8	14233484	G	T	0.0360169	2.01648e-08
bio12	7	6332387	C	G	0.0095057	2.11641e-08
bio12	2	6499851	G	A	0.0110132	2.12248e-08
bio12	7	7549191	C	T	0.0314465	2.26297e-08
bio12	1	17565473	T	A	0.136771	2.27415e-08
bio12	1	34013757	A	G	0.0366972	2.27641e-08
bio12	8	14045269	G	A	0.0327869	2.29939e-08
bio12	7	6776528	C	T	0.0103734	2.32158e-08
bio12	5	4359001	G	T	0.0207469	2.37313e-08
bio12	4	6604658	C	A	0.0504032	2.47048e-08
bio12	2	22654594	T	G	0.350649	2.48465e-08
bio12	5	4256253	C	T	0.0202429	2.49533e-08
bio12	4	2582769	C	T	0.0228216	2.61075e-08
bio12	5	4500788	G	A	0.0213675	2.66871e-08
bio12	5	4292000	G	A	0.0212766	2.69038e-08
bio12	3	26428211	C	G	0.0217391	2.76576e-08
bio12	1	27785556	G	A	0.026178	2.92274e-08
bio12	7	5659591	G	C	0.0109649	2.96386e-08
bio12	1	27509198	G	T	0.0732984	3.03011e-08
bio12	5	7926222	C	T	0.0217391	3.03584e-08
bio12	3	26608660	T	C	0.0158371	3.10826e-08
bio12	8	14006102	G	T	0.0440529	3.15697e-08
bio12	8	14049216	G	T	0.0366972	3.16542e-08
bio12	1	27513198	A	T	0.0205761	3.20311e-08
bio12	8	14837688	A	G	0.0450644	3.66068e-08
bio12	8	14041245	G	A	0.0431034	3.76718e-08
bio13	2	6637645	C	T	0.009375	6.42355e-14
bio13	1	20728698	G	A	0.0102041	2.83222e-13
bio13	2	6112633	T	C	0.00704225	5.5166e-13
bio13	2	4889080	G	T	0.0319149	1.66818e-11
bio13	2	6652819	T	C	0.00604839	2.71094e-11
bio13	2	5556395	A	G	0.00917431	2.74214e-10
bio13	2	5076347	C	T	0.00704225	2.83158e-10
bio13	2	6118318	T	C	0.00672646	3.30278e-10
bio13	7	20880121	C	T	0.00632911	3.31074e-10
bio13	2	5155944	A	C	0.00691244	3.54467e-10
bio13	2	5508242	T	G	0.0460251	4.51392e-10
bio13	1	5995730	G	A	0.00420168	9.5756e-10
bio13	1	20731327	T	A	0.00753769	1.5454e-09
bio13	7	20880127	T	G	0.00627615	1.89446e-09
bio13	2	28062229	A	G	0.0101215	2.23914e-09
bio13	1	20616129	A	G	0.0448718	3.02648e-09
bio13	8	14489374	A	G	0.335938	3.59524e-09
bio13	2	5510156	T	G	0.00657895	4.62087e-09
bio13	5	8136957	C	T	0.174468	4.62999e-09
bio13	2	5893891	G	A	0.0117647	6.14724e-09
bio13	2	6112608	C	T	0.00669643	6.97153e-09
bio13	2	4935914	A	C	0.0204082	7.68045e-09
bio13	2	5155220	T	G	0.00632911	8.57589e-09
bio13	2	5374451	T	G	0.00684932	8.7489e-09
bio13	2	6650138	A	C	0.0343137	8.9483e-09
bio13	2	5344545	G	T	0.00896861	9.49132e-09
bio13	5	9912089	T	G	0.315574	9.85194e-09
bio13	5	12213267	C	T	0.0562771	1.13501e-08
bio13	1	4723341	T	C	0.0177665	1.47449e-08
bio13	3	17689489	A	T	0.0440529	1.51416e-08
bio13	2	6227305	A	G	0.00934579	1.59881e-08
bio13	2	5553356	T	C	0.00669643	1.77112e-08
bio13	2	4935869	T	C	0.0196078	1.88237e-08
bio13	2	5469455	T	G	0.00632911	2.02586e-08
bio13	1	20724818	C	T	0.00731707	2.33674e-08
bio13	1	27870154	C	T	0.0748899	2.38518e-08
bio13	1	16820350	G	A	0.497143	2.42092e-08
bio13	2	3767164	G	A	0.200422	2.88243e-08
bio13	3	17689498	A	T	0.00614754	2.88424e-08
bio13	6	19921900	A	G	0.00872093	2.88613e-08
bio13	6	4972751	C	T	0.109649	2.9172e-08
bio13	2	6647156	T	A	0.007109	3.11806e-08
bio13	2	5786838	G	A	0.0132743	3.33309e-08
bio13	2	7199710	C	T	0.00588235	3.37786e-08
bio13	2	5740641	A	C	0.00657895	3.69981e-08
bio13	4	21826461	T	C	0.133333	3.73305e-08
bio13	5	4262347	G	A	0.0866667	3.7462e-08
bio13	2	6112605	G	A	0.00678733	3.7928e-08
bio14	4	2607795	C	T	0.22	1.28815e-10
bio14	4	5946720	G	A	0.0400844	1.88168e-09
bio14	6	5284069	G	A	0.0808511	1.99021e-09
bio14	4	4207734	T	C	0.2249	2.33859e-09
bio14	6	5344384	A	C	0.0798319	3.1014e-09
bio14	6	5287518	A	C	0.077551	3.2382e-09
bio14	4	6604658	C	A	0.0504032	6.437e-09
bio14	4	14138618	C	A	0.10514	6.81374e-09
bio14	8	1291188	T	G	0.220648	8.31576e-09
bio14	2	4052532	C	G	0.2	1.6743e-08
bio14	2	25864181	A	G	0.035865	1.79353e-08
bio14	4	4207703	T	G	0.220648	1.82005e-08
bio14	3	2586173	T	C	0.0121359	2.82875e-08
bio14	3	2586211	C	T	0.0159574	3.37143e-08
bio15	6	11444682	T	A	0.242616	1.27053e-08
bio15	6	11612898	T	A	0.309524	1.59382e-07
bio15	1	17507331	C	T	0.0533981	7.35738e-07
bio16	2	4027603	T	C	0.300448	1.43478e-160
bio16	2	4027604	G	T	0.210762	1.43478e-160
bio16	8	12045042	A	G	0.252809	9.16872e-153
bio16	2	4603558	A	T	0.288321	1.8448e-143
bio16	1	26265195	G	A	0.00458716	5.15548e-124
bio16	3	1497260	A	C	0.192797	2.42445e-91
bio16	6	26158034	A	C	0.20082	6.36221e-90
bio16	6	20399662	A	G	0.211207	2.28934e-86
bio16	3	13895102	T	C	0.00816327	5.92878e-59
bio16	2	4049892	G	A	0.198661	2.44889e-57
bio16	2	9208218	C	T	0.10515	1.40815e-55
bio16	2	5446602	T	C	0.203947	1.62822e-55
bio16	4	20840786	G	C	0.0127119	2.54281e-48
bio16	3	5454748	A	G	0.0143678	1.26203e-45
bio16	2	15290020	C	T	0.0176768	3.46564e-45
bio16	2	2718829	T	A	0.213115	2.02041e-44
bio16	2	3089878	C	G	0.321656	6.89845e-43
bio16	3	26692930	G	A	0.0897436	2.04168e-39
bio16	4	12337495	T	A	0.00462963	9.21054e-38
bio16	2	22188627	A	C	0.210177	4.09463e-36
bio16	1	1284442	C	T	0.0663717	2.14981e-35
bio16	6	11862107	A	G	0.171053	7.88741e-33
bio16	2	26113446	A	G	0.0136612	9.05988e-33
bio16	5	38428	G	T	0.0180995	1.10899e-32
bio16	1	26337618	A	G	0.0702479	1.19459e-31
bio16	5	14636241	T	G	0.00649351	2.69932e-31
bio16	5	15125902	A	G	0.004329	2.1315e-28
bio16	1	39544919	T	C	0.0304054	4.65526e-28
bio16	1	42471226	A	G	0.201681	4.95264e-28
bio16	1	12300154	T	A	0.0512821	8.08218e-28
bio16	8	3477996	C	G	0.0174419	8.11463e-28
bio16	8	8911409	T	G	0.165217	1.01407e-27
bio16	2	24665418	T	C	0.0106383	1.24435e-27
bio16	4	3767803	A	G	0.00873362	1.66286e-27
bio16	2	20685556	C	A	0.00452489	1.89781e-27
bio16	5	4654021	C	T	0.320513	1.74587e-26
bio16	3	26018722	G	A	0.00480769	8.29747e-26
bio16	4	24609631	T	C	0.289116	1.6593e-25
bio16	1	47479821	T	C	0.0163265	4.12587e-25
bio16	2	28806713	C	T	0.0164835	5.09449e-25
bio16	7	7782340	A	G	0.209924	5.50095e-25
bio16	4	24404176	C	T	0.415625	1.42935e-24
bio16	2	23696369	T	C	0.0134409	1.54523e-24
bio16	7	15139219	T	C	0.252049	2.58438e-24
bio16	7	5659591	G	C	0.0109649	3.33027e-24
bio16	2	29403675	C	T	0.00507614	4.44989e-24
bio16	5	9634153	T	A	0.385776	4.76517e-24
bio16	8	3054952	G	A	0.0350877	2.21479e-22
bio16	5	7924499	C	T	0.0230769	6.39843e-22
bio16	5	15149612	A	T	0.0121951	7.8116e-22
bio16	4	1175296	C	T	0.300847	3.54272e-21
bio16	3	18045511	T	G	0.31405	3.79061e-21
bio16	2	13574479	C	T	0.206186	7.1139e-21
bio16	3	23534499	G	T	0.0151515	7.43814e-21
bio16	5	7967336	C	A	0.0426136	1.10469e-20
bio16	2	5236180	C	G	0.0105042	2.091e-20
bio16	1	1382310	G	C	0.353604	8.89894e-20
bio16	1	47627094	C	T	0.197034	9.97631e-20
bio16	8	1512944	C	T	0.103448	1.97133e-19
bio16	7	352025	A	T	0.0364372	2.09092e-19
bio16	8	11899608	C	T	0.132558	3.27796e-19
bio16	2	6050634	C	A	0.00401606	5.53424e-19
bio16	1	46839834	G	C	0.431718	7.6383e-19
bio16	3	26654311	A	T	0.0164609	1.44881e-18
bio16	4	9008484	A	G	0.369658	1.65363e-18
bio16	3	1755271	G	T	0.17382	4.89328e-18
bio16	7	7429501	G	A	0.41048	9.46966e-18
bio16	4	12957698	G	A	0.06	9.62438e-18
bio16	4	24047583	A	G	0.474537	1.02811e-17
bio16	8	9744025	A	T	0.308571	1.9912e-17
bio16	5	6797220	C	T	0.0367232	2.21188e-17
bio16	3	22614603	A	G	0.436404	2.67156e-17
bio16	2	24115519	G	A	0.00666667	2.89096e-17
bio16	4	5129693	C	G	0.0409091	3.58734e-17
bio16	8	5062836	A	G	0.379902	7.55921e-17
bio16	8	1106318	G	A	0.188755	1.26964e-16
bio16	8	12004564	G	A	0.0128205	1.28688e-16
bio16	3	22276966	T	C	0.32563	1.91801e-16
bio16	5	4393079	G	T	0.296537	2.81298e-16
bio16	6	20745752	G	A	0.00537634	2.90661e-16
bio16	4	6397230	A	G	0.0495868	3.27847e-16
bio16	3	14809444	C	T	0.0996169	4.25212e-16
bio16	2	5825419	G	A	0.0145349	4.82299e-16
bio16	5	8014489	T	A	0.0078125	6.84458e-16
bio16	1	45958778	T	C	0.011194	8.07407e-16
bio16	2	20020825	A	G	0.275956	8.38471e-16
bio16	2	13570842	G	T	0.173529	1.1582e-15
bio16	2	16253513	G	T	0.0183486	1.34365e-15
bio16	1	5505900	G	A	0.227273	1.52391e-15
bio16	7	6448914	G	A	0.00793651	1.73545e-15
bio16	1	47667324	T	C	0.15942	2.08633e-15
bio16	2	21248941	T	C	0.421053	2.10921e-15
bio16	7	11783201	C	A	0.0372093	3.58932e-15
bio16	2	4988377	T	G	0.104938	1.15151e-14
bio16	2	4988378	A	G	0.118012	1.15151e-14
bio16	2	2782703	T	G	0.00826446	1.29295e-14
bio16	2	4889073	A	G	0.097561	1.46192e-14
bio16	4	9674747	G	A	0.00452489	2.03439e-14
bio16	7	16976650	G	A	0.00260417	2.05237e-14
bio16	5	7128237	C	T	0.0519481	2.15451e-14
bio16	2	8908770	G	A	0.301471	2.72435e-14
bio16	3	12684602	C	A	0.00892857	3.47481e-14
bio16	1	47666204	T	A	0.0110497	3.61992e-14
bio16	1	42546004	T	G	0.18559	3.77529e-14
bio16	2	23516884	T	C	0.0376569	4.10105e-14
bio16	3	15235599	T	C	0.146444	4.89701e-14
bio16	4	9653998	C	T	0.00824176	4.92962e-14
bio16	1	47626956	A	T	0.182203	5.30115e-14
bio16	2	13890903	C	A	0.459677	6.08692e-14
bio16	2	8881207	T	C	0.472222	6.5072e-14
bio16	1	47661409	C	T	0.0041841	6.96665e-14
bio16	4	23667976	T	C	0.159389	1.02781e-13
bio16	8	18322003	G	A	0.491736	1.22705e-13
bio16	5	15159877	T	C	0.0146444	1.43369e-13
bio16	8	13138702	C	A	0.252294	1.47332e-13
bio16	8	13411448	T	C	0.144118	1.66903e-13
bio16	2	7879077	A	G	0.0126582	1.70361e-13
bio16	2	13457072	G	A	0.00663717	1.74434e-13
bio16	6	18535783	T	C	0.0824468	1.85858e-13
bio16	1	22076508	G	A	0.137931	2.08778e-13
bio16	4	16244539	A	G	0.23251	2.51252e-13
bio16	2	21857993	T	G	0.154661	2.66179e-13
bio16	8	2704639	G	T	0.0217391	2.71805e-13
bio16	2	2486270	A	G	0.212446	2.77718e-13
bio16	5	6055599	G	A	0.00699301	2.89111e-13
bio16	2	8837452	C	A	0.0594595	2.95358e-13
bio16	8	6190239	G	A	0.0136364	3.12916e-13
bio16	3	21744569	G	A	0.165929	3.2268e-13
bio16	2	21621149	G	A	0.00416667	3.6115e-13
bio16	4	14737274	G	A	0.338462	3.65382e-13
bio16	2	24709922	A	C	0.00446429	3.71569e-13
bio16	4	14773100	A	C	0.288462	4.22322e-13
bio16	6	8886047	T	C	0.0042735	4.54236e-13
bio16	2	4695521	G	C	0.17316	4.58652e-13
bio16	5	13521510	G	C	0.205882	5.50629e-13
bio16	1	24322694	G	A	0.0135747	5.76429e-13
bio16	2	15561887	T	G	0.0497738	7.66043e-13
bio16	3	7232426	G	A	0.386555	9.23927e-13
bio16	1	40384720	C	T	0.15625	9.58797e-13
bio16	2	4889055	C	T	0.0224359	1.13894e-12
bio16	8	1979250	G	A	0.0292887	1.20257e-12
bio16	7	10562878	T	A	0.0987903	1.31993e-12
bio16	2	5450215	G	A	0.00217391	2.00719e-12
bio16	1	43052595	A	T	0.00420168	2.14455e-12
bio16	5	8732896	G	A	0.0810185	2.18685e-12
bio16	5	14103483	G	A	0.265306	2.22629e-12
bio16	2	22732904	A	C	0.004	2.31191e-12
bio16	5	4251056	T	C	0.266667	2.4347e-12
bio16	3	1640620	T	A	0.00925926	2.51385e-12
bio16	1	40923403	G	A	0.00438596	2.70908e-12
bio16	2	6523738	G	A	0.00854701	2.75991e-12
bio16	5	12510319	C	T	0.00456621	2.78536e-12
bio16	6	10999680	A	G	0.31746	3.06397e-12
bio16	1	34791338	G	A	0.00829876	3.6191e-12
bio16	2	16170760	C	T	0.00411523	3.88673e-12
bio16	7	14461250	C	T	0.00904977	4.04766e-12
bio16	1	14685430	T	C	0.118952	4.05398e-12
bio16	1	34008354	C	T	0.195853	4.06994e-12
bio16	4	16769171	C	A	0.424686	4.16702e-12
bio16	2	15978860	A	G	0.178218	4.43874e-12
bio16	6	17139622	G	A	0.189498	4.63388e-12
bio16	7	19287533	C	T	0.0194175	4.78206e-12
bio16	2	6571542	C	T	0.00657895	6.02179e-12
bio16	8	1268857	C	T	0.0104712	6.59422e-12
bio16	2	17710471	C	T	0.270563	7.68101e-12
bio16	5	8120110	A	C	0.129717	8.13659e-12
bio16	4	906665	C	A	0.247951	8.4507e-12
bio16	5	4262427	A	G	0.247899	8.84172e-12
bio16	2	5224267	C	A	0.00904977	9.53079e-12
bio16	2	8064479	G	A	0.00598802	9.54264e-12
bio16	2	6123551	C	G	0.011236	9.89993e-12
bio16	2	10750975	C	T	0.0414847	1.02953e-11
bio16	8	5549799	C	T	0.331731	1.0379e-11
bio16	1	41561186	A	G	0.00591716	1.04554e-11
bio16	1	37497865	G	A	0.183857	1.08711e-11
bio16	3	460093	T	G	0.00823045	1.09873e-11
bio16	2	6159727	G	A	0.093617	1.13126e-11
bio16	4	12954745	C	T	0.0047619	1.13264e-11
bio16	1	34171007	A	G	0.0148305	1.17595e-11
bio16	1	4928044	A	G	0.446875	1.24915e-11
bio16	1	20610202	A	C	0.0684647	1.26206e-11
bio16	2	6921946	C	G	0.00824176	1.36681e-11
bio16	3	80410	A	G	0.004329	1.63666e-11
bio16	6	22928242	T	C	0.28125	1.728e-11
bio16	1	37817084	T	C	0.00568182	1.80532e-11
bio16	2	20525750	A	G	0.0586957	2.31816e-11
bio16	3	23568580	C	A	0.00961538	2.34648e-11
bio16	2	5579353	G	C	0.0172414	2.38129e-11
bio16	8	14411950	T	G	0.386047	2.44601e-11
bio16	1	38957127	T	C	0.493333	2.65867e-11
bio16	1	34062752	G	A	0.0536481	2.79896e-11
bio16	2	5511742	G	T	0.0548523	2.8498e-11
bio16	5	1902126	C	T	0.239044	3.0939e-11
bio16	5	1902127	C	T	0.239044	3.0939e-11
bio16	2	15000648	C	T	0.0648148	3.1624e-11
bio16	5	10443560	A	G	0.164444	3.40053e-11
bio16	1	21873217	T	A	0.145714	3.5955e-11
bio16	6	7697587	T	A	0.00872093	3.61596e-11
bio16	2	5057214	G	A	0.0042735	3.71683e-11
bio16	2	5471799	T	A	0.0138889	3.88017e-11
bio16	4	6795473	A	G	0.0021097	3.94989e-11
bio16	6	1746476	G	A	0.180995	3.96652e-11
bio16	4	7931554	C	T	0.0045045	3.98908e-11
bio16	8	2316551	T	C	0.326271	4.01648e-11
bio16	4	22808664	G	T	0.0137615	4.65559e-11
bio16	8	12554311	C	A	0.345411	4.79927e-11
bio16	7	15871113	A	G	0.0112108	4.9946e-11
bio16	1	45837722	G	T	0.139004	5.06478e-11
bio16	2	4697197	C	T	0.00840336	5.46965e-11
bio16	2	5563662	C	T	0.180804	5.48904e-11
bio16	5	13553365	C	T	0.0741525	5.79001e-11
bio16	8	17044266	A	G	0.00423729	5.82226e-11
bio16	1	39352690	A	G	0.00619835	6.16627e-11
bio16	7	5855627	C	G	0.0966981	6.24204e-11
bio16	2	2832166	A	G	0.418782	6.28467e-11
bio16	8	6028567	T	C	0.495327	6.62565e-11
bio16	2	4783772	C	T	0.0130435	6.89722e-11
bio16	2	5767458	G	A	0.00909091	7.15895e-11
bio16	5	14646423	G	A	0.00614754	7.35669e-11
bio16	1	27494504	C	T	0.0208333	7.37609e-11
bio16	1	20112801	G	A	0.105991	7.4088e-11
bio16	1	12609323	G	A	0.280973	7.60856e-11
bio16	2	25599858	T	C	0.0101523	7.85284e-11
bio16	1	47295548	T	A	0.00420168	8.40489e-11
bio16	7	18729911	T	C	0.191111	9.67902e-11
bio16	7	14525143	G	T	0.00858369	9.92583e-11
bio16	4	6947877	C	T	0.0133929	1.15697e-10
bio16	1	35239997	T	C	0.00408163	1.32887e-10
bio16	2	13839182	C	T	0.123913	1.39991e-10
bio16	2	5055925	A	G	0.0105042	1.45965e-10
bio16	5	4270526	T	G	0.259259	1.51637e-10
bio16	2	10305587	G	A	0.010929	1.52371e-10
bio16	2	27940710	C	A	0.00652174	1.58693e-10
bio16	1	36699086	T	C	0.030303	1.70865e-10
bio16	8	17792610	T	C	0.0132159	1.75317e-10
bio16	2	6545551	C	A	0.012	1.76302e-10
bio16	3	23935491	C	T	0.213693	1.8006e-10
bio16	2	22403738	T	C	0.424658	1.83478e-10
bio16	7	13631773	C	T	0.00833333	1.9315e-10
bio16	1	14413267	T	C	0.136957	1.99826e-10
bio16	3	3696085	C	T	0.00425532	2.0712e-10
bio16	1	47614044	C	G	0.0107296	2.13937e-10
bio16	7	14680374	T	C	0.338095	2.18407e-10
bio16	5	7606853	G	T	0.0052356	2.2475e-10
bio16	1	34172289	C	T	0.0146444	2.57961e-10
bio16	5	11927337	A	G	0.019802	2.58428e-10
bio16	5	12418507	G	A	0.13785	2.65417e-10
bio16	5	2372518	G	A	0.00645161	2.933e-10
bio16	5	2372519	T	C	0.00645161	2.933e-10
bio16	4	7257294	G	T	0.00823045	3.11941e-10
bio16	1	47645570	T	C	0.0125	3.33516e-10
bio16	8	17792453	A	G	0.150224	3.34389e-10
bio16	7	15529876	G	A	0.00440529	3.47578e-10
bio16	6	18168598	A	G	0.00847458	3.50467e-10
bio16	7	2356227	C	T	0.311927	3.65245e-10
bio16	2	3297056	A	G	0.2375	3.70268e-10
bio16	7	15903406	A	G	0.00406504	3.71501e-10
bio16	2	28067905	A	C	0.0083682	3.79366e-10
bio16	2	7217366	A	T	0.00843882	3.93621e-10
bio16	2	6463724	C	T	0.0108696	3.96907e-10
bio16	4	16195319	T	C	0.467105	4.19901e-10
bio16	7	5256814	A	C	0.204023	4.38112e-10
bio16	2	6055902	T	C	0.00666667	4.68153e-10
bio16	2	5033273	G	A	0.0112108	4.85167e-10
bio16	2	21621348	C	T	0.164634	5.25817e-10
bio16	2	5860129	A	G	0.0116279	5.3794e-10
bio16	8	1860369	G	A	0.0408163	5.6144e-10
bio16	6	20856309	G	T	0.0114504	5.68455e-10
bio16	4	13077506	A	C	0.160173	5.74445e-10
bio16	1	32315602	G	A	0.00465116	5.8797e-10
bio16	5	3036852	A	T	0.198895	6.05898e-10
bio16	1	17642613	T	A	0.0895833	6.64059e-10
bio16	6	24100174	T	G	0.178771	6.78589e-10
bio16	2	9135742	A	G	0.0286885	6.91674e-10
bio16	2	28145129	C	T	0.00452489	7.13781e-10
bio16	3	26373495	A	G	0.0188285	8.82314e-10
bio16	3	6886067	A	C	0.0833333	8.83095e-10
bio16	8	5128733	C	T	0.0335821	8.88694e-10
bio16	3	20905435	C	A	0.0160428	9.07391e-10
bio16	2	6158505	C	T	0.0115741	9.20506e-10
bio16	2	13275644	A	G	0.0154185	9.38917e-10
bio16	7	18719419	G	A	0.00510204	9.97712e-10
bio16	7	14457845	C	T	0.00833333	1.02017e-09
bio16	2	5523725	A	C	0.00663717	1.02569e-09
bio16	2	28021510	C	T	0.0171674	1.13543e-09
bio16	5	11905980	A	G	0.0493827	1.18001e-09
bio16	8	21891263	C	T	0.0142857	1.2522e-09
bio16	8	6532243	G	T	0.0744681	1.25532e-09
bio16	2	21622859	T	A	0.177083	1.27052e-09
bio16	7	17233166	A	G	0.00431034	1.37002e-09
bio16	6	19221616	T	C	0.153439	1.42666e-09
bio16	3	26247085	T	C	0.429185	1.43899e-09
bio16	2	8248589	G	A	0.00411523	1.44225e-09
bio16	6	10503840	C	G	0.458333	1.46655e-09
bio16	5	15149767	A	G	0.195219	1.52838e-09
bio16	6	25164013	C	T	0.0225	1.55324e-09
bio16	2	6274825	A	T	0.0238095	1.58862e-09
bio16	7	14462716	A	G	0.00858369	1.60864e-09
bio16	7	1208415	T	C	0.358852	1.62185e-09
bio16	7	17229613	G	T	0.175847	1.71271e-09
bio16	4	14113661	G	A	0.00635593	1.74474e-09
bio16	1	39775137	G	T	0.367021	1.75049e-09
bio16	5	4266997	C	T	0.0677966	1.86454e-09
bio16	3	23356893	C	A	0.00847458	2.1097e-09
bio16	5	2198522	A	T	0.00404858	2.14062e-09
bio16	1	10303129	C	A	0.272021	2.18828e-09
bio16	1	17449920	T	A	0.384937	2.19166e-09
bio16	6	6944841	G	T	0.00420168	2.21072e-09
bio16	2	13521920	T	C	0.346667	2.27685e-09
bio16	5	17006734	T	C	0.285714	2.37454e-09
bio16	1	47625195	T	C	0.0124481	2.51408e-09
bio16	1	13980563	T	C	0.483173	2.55334e-09
bio16	2	26274714	G	A	0.0101215	2.57157e-09
bio16	2	6235112	A	G	0.0194805	2.60412e-09
bio16	4	6763371	G	A	0.00421941	2.60816e-09
bio16	7	14696527	G	A	0.0187793	2.60942e-09
bio16	2	7135313	G	A	0.007109	2.67355e-09
bio16	4	19796259	G	A	0.0110619	2.67972e-09
bio16	2	28018819	G	C	0.175325	2.75633e-09
bio16	8	13254703	T	A	0.159574	2.7772e-09
bio16	3	4274300	A	G	0.214646	2.82538e-09
bio16	1	34168178	G	A	0.0148305	2.83509e-09
bio16	3	26693764	A	G	0.222727	2.86795e-09
bio16	2	1462362	A	T	0.091195	2.88651e-09
bio16	1	47658263	C	T	0.00413223	3.07353e-09
bio16	4	13455453	C	T	0.00408163	3.08254e-09
bio16	2	5828555	C	T	0.00460829	3.09056e-09
bio16	3	23344177	A	T	0.173554	3.36014e-09
bio16	6	4574612	C	T	0.390351	3.37367e-09
bio16	2	8064391	C	T	0.00949367	3.47831e-09
bio16	2	4008654	G	T	0.0275862	3.49242e-09
bio16	2	8461008	C	G	0.00465116	3.55489e-09
bio16	5	8003508	T	G	0.17234	3.55903e-09
bio16	3	20353325	T	G	0.128	3.59066e-09
bio16	2	28022500	T	A	0.0163934	3.74253e-09
bio16	1	16224319	T	C	0.34633	3.98576e-09
bio16	5	7463976	C	T	0.00512821	4.04905e-09
bio16	2	16328245	C	T	0.0182927	4.14485e-09
bio16	5	9972896	T	A	0.00492611	4.16399e-09
bio16	1	38941077	G	C	0.00881057	4.23853e-09
bio16	2	26454660	G	A	0.0130719	4.51033e-09
bio16	4	19943283	G	A	0.0045045	4.53304e-09
bio16	3	6179043	C	G	0.0041841	4.65667e-09
bio16	3	3460105	G	A	0.155367	4.9532e-09
bio16	5	15061541	G	T	0.0204545	5.05609e-09
bio16	2	7843979	C	T	0.0234375	5.39349e-09
bio16	4	7336011	T	A	0.0105042	5.39921e-09
bio16	5	4374257	C	T	0.295259	5.39996e-09
bio16	2	9552928	C	T	0.0583756	5.4426e-09
bio16	2	5468616	A	T	0.00669643	5.50571e-09
bio16	3	5952807	C	T	0.00558659	5.54301e-09
bio16	4	13075741	C	T	0.195378	5.56039e-09
bio16	3	23887691	T	C	0.199153	5.57939e-09
bio16	4	3221280	G	A	0.118919	5.67174e-09
bio16	3	6108172	G	A	0.00671141	5.76052e-09
bio16	2	6682341	A	G	0.142857	5.7705e-09
bio16	2	16884216	C	T	0.00446429	5.83444e-09
bio16	3	8960258	T	A	0.159091	6.06042e-09
bio16	2	11593835	G	A	0.297235	6.06856e-09
bio16	6	21010846	G	A	0.408898	6.12106e-09
bio16	1	34054666	A	C	0.0100503	6.19636e-09
bio16	2	30252454	C	T	0.0041841	6.29889e-09
bio16	2	7663277	G	A	0.00436681	6.47032e-09
bio16	4	15135993	A	G	0.319196	6.79406e-09
bio16	7	4314220	A	G	0.0465116	6.96654e-09
bio16	8	19434184	G	A	0.289474	7.0414e-09
bio16	1	47635310	C	G	0.0239044	7.19605e-09
bio16	8	18813679	G	A	0.286996	7.34973e-09
bio16	8	9268358	G	T	0.05	7.4839e-09
bio16	4	24046738	G	A	0.361233	7.51594e-09
bio16	2	5825775	A	G	0.00877193	7.63729e-09
bio16	4	325236	C	T	0.010917	7.6725e-09
bio16	4	5451514	A	G	0.286885	8.00637e-09
bio16	2	10547821	C	G	0.102632	8.27356e-09
bio16	1	20731342	G	A	0.00753769	8.48081e-09
bio16	5	4266805	T	A	0.0798319	8.851e-09
bio16	1	28595639	T	A	0.409664	8.87534e-09
bio16	3	607653	T	C	0.0124481	9.09025e-09
bio16	1	37581460	C	T	0.0214286	9.44319e-09
bio16	5	3926201	T	G	0.0336134	9.52781e-09
bio16	3	6688596	T	A	0.00892857	9.86232e-09
bio16	8	239019	T	C	0.020202	9.88418e-09
bio16	5	4223762	C	A	0.234234	1.00673e-08
bio16	2	6895498	A	G	0.0047619	1.01601e-08
bio16	1	34439949	G	A	0.0141509	1.02691e-08
bio16	1	44913928	A	G	0.297468	1.03286e-08
bio16	1	34112848	A	G	0.012931	1.05025e-08
bio16	5	10949641	G	A	0.039267	1.05738e-08
bio16	2	28844723	C	G	0.00431034	1.09066e-08
bio16	7	14458380	A	G	0.207589	1.09841e-08
bio16	2	18625259	A	G	0.004329	1.12664e-08
bio16	4	21571023	A	G	0.368056	1.13358e-08
bio16	1	43433939	A	G	0.00852273	1.15051e-08
bio16	2	13258366	A	T	0.0298507	1.15815e-08
bio16	1	42554463	T	A	0.00854701	1.20544e-08
bio16	5	8003576	A	G	0.12987	1.20771e-08
bio16	5	2328895	A	C	0.410042	1.25515e-08
bio16	1	39348743	A	G	0.184322	1.30195e-08
bio16	3	24442989	C	A	0.00854701	1.31058e-08
bio16	2	9134164	A	G	0.034632	1.37296e-08
bio16	1	47637504	A	G	0.179654	1.45009e-08
bio16	8	2832256	G	A	0.0179856	1.54608e-08
bio16	2	5893891	G	A	0.0117647	1.59624e-08
bio16	1	34832694	T	G	0.0103306	1.6403e-08
bio16	6	20288168	C	T	0.0102041	1.70729e-08
bio16	7	14462941	G	A	0.00995025	1.77097e-08
bio16	3	20075417	G	A	0.0645161	1.8175e-08
bio16	8	17793177	C	T	0.146	1.83696e-08
bio16	3	14715413	A	C	0.039548	1.85597e-08
bio16	1	43438796	C	T	0.189904	1.86676e-08
bio16	1	37892447	C	G	0.17551	1.88033e-08
bio16	3	23348760	C	G	0.00446429	1.90726e-08
bio16	2	22087744	C	A	0.0938967	1.90777e-08
bio16	7	15688405	T	G	0.193277	1.95779e-08
bio16	7	15688406	T	G	0.193277	1.95779e-08
bio16	2	5525558	T	C	0.010989	1.99457e-08
bio16	1	47632274	T	G	0.0103734	2.07595e-08
bio16	8	17791346	G	A	0.15368	2.07848e-08
bio16	1	42658964	A	C	0.00980392	2.1392e-08
bio16	5	2582486	G	A	0.494048	2.17254e-08
bio16	4	2905340	C	G	0.0329218	2.17946e-08
bio16	4	2497067	C	G	0.0137795	2.34994e-08
bio16	4	15761055	C	T	0.00465116	2.35078e-08
bio16	2	26088631	C	T	0.010917	2.38273e-08
bio16	3	11301641	A	G	0.0617284	2.48935e-08
bio16	8	2025558	G	A	0.158257	2.50957e-08
bio16	2	13610970	G	A	0.410256	2.52727e-08
bio16	7	5124019	G	A	0.0115207	2.55514e-08
bio16	7	14461286	G	A	0.00884956	2.57e-08
bio16	5	12418073	A	G	0.0304348	2.57221e-08
bio16	1	40865173	C	T	0.00865801	2.57449e-08
bio16	7	3718232	A	G	0.0148936	2.5796e-08
bio16	8	2906009	C	T	0.00436681	2.60745e-08
bio16	7	12837787	T	G	0.0126904	2.66741e-08
bio16	5	16783005	A	G	0.00609756	2.73017e-08
bio16	3	15401814	T	C	0.347458	2.80625e-08
bio16	5	4354985	T	A	0.128959	2.89053e-08
bio16	8	5670352	T	C	0.05	2.89072e-08
bio16	4	14094505	G	A	0.00619835	2.95764e-08
bio16	2	3376417	G	C	0.025	2.96315e-08
bio16	2	13167802	T	C	0.10124	2.98298e-08
bio16	4	9844902	A	G	0.211538	3.00977e-08
bio16	3	23945247	G	T	0.0916667	3.01206e-08
bio16	4	9782161	C	T	0.410628	3.02503e-08
bio16	8	12382300	T	C	0.00896861	3.02736e-08
bio16	7	14493506	A	C	0.00806452	3.04615e-08
bio16	2	5520040	T	G	0.0101215	3.21875e-08
bio16	2	6999141	G	T	0.0166667	3.22898e-08
bio16	4	14579099	G	A	0.00429185	3.29241e-08
bio16	2	23287128	G	C	0.359244	3.37094e-08
bio16	5	14162632	T	C	0.357447	3.37391e-08
bio16	1	34223349	C	G	0.190476	3.45129e-08
bio16	7	18655093	A	G	0.00444444	3.51207e-08
bio16	6	14338012	A	G	0.0493562	3.56643e-08
bio16	2	4815157	G	A	0.0103627	3.57961e-08
bio16	7	15856591	C	T	0.0243902	3.65194e-08
bio16	7	15856592	T	C	0.0243902	3.65194e-08
bio16	3	15417162	T	C	0.30543	3.67235e-08
bio16	8	4579637	A	G	0.0224719	3.71726e-08
bio16	8	19636651	T	A	0.151111	3.73629e-08
bio16	3	3118099	A	C	0.438559	3.77622e-08
bio17	4	5946720	G	A	0.0400844	9.11409e-11
bio17	4	2607795	C	T	0.22	3.51326e-10
bio17	4	4207734	T	C	0.2249	4.78133e-10
bio17	6	5284069	G	A	0.0808511	9.40846e-10
bio17	6	5344384	A	C	0.0798319	1.00041e-09
bio17	6	5287518	A	C	0.077551	2.08985e-09
bio17	4	4207703	T	G	0.220648	3.42504e-09
bio17	4	6604658	C	A	0.0504032	3.6043e-09
bio17	8	1291188	T	G	0.220648	5.63218e-09
bio17	4	14138618	C	A	0.10514	1.00435e-08
bio17	2	25864181	A	G	0.035865	2.10708e-08
bio17	1	28684108	C	T	0.218579	2.79407e-08
bio17	2	4052532	C	G	0.2	2.81495e-08
bio17	2	9145932	T	C	0.07	3.36498e-08
bio18	4	2607795	C	T	0.22	1.28815e-10
bio18	4	5946720	G	A	0.0400844	1.88168e-09
bio18	6	5284069	G	A	0.0808511	1.99021e-09
bio18	4	4207734	T	C	0.2249	2.33859e-09
bio18	6	5344384	A	C	0.0798319	3.1014e-09
bio18	6	5287518	A	C	0.077551	3.2382e-09
bio18	4	6604658	C	A	0.0504032	6.437e-09
bio18	4	14138618	C	A	0.10514	6.81374e-09
bio18	8	1291188	T	G	0.220648	8.31576e-09
bio18	2	4052532	C	G	0.2	1.6743e-08
bio18	2	25864181	A	G	0.035865	1.79353e-08
bio18	4	4207703	T	G	0.220648	1.82005e-08
bio18	3	2586173	T	C	0.0121359	2.82875e-08
bio18	3	2586211	C	T	0.0159574	3.37143e-08
bio19	4	4207734	T	C	0.2249	1.8478e-10
bio19	4	2607795	C	T	0.22	2.12781e-10
bio19	4	5946720	G	A	0.0400844	2.34383e-10
bio19	2	4052532	C	G	0.2	6.51351e-10
bio19	4	14138618	C	A	0.10514	1.83249e-09
bio19	4	4207703	T	G	0.220648	1.94916e-09
bio19	4	6604658	C	A	0.0504032	2.85507e-09
bio19	6	5344384	A	C	0.0798319	6.33061e-09
bio19	6	5284069	G	A	0.0808511	6.82213e-09
bio19	6	5287518	A	C	0.077551	9.97516e-09
bio19	4	6957422	T	C	0.230435	9.98054e-09
bio19	8	1291188	T	G	0.220648	1.0222e-08
bio19	2	25864181	A	G	0.035865	1.0919e-08
bio19	3	15169840	G	A	0.0296804	1.33781e-08
bio19	4	4525040	C	A	0.0788382	3.33821e-08
bio2	4	2989627	G	T	0.08125	3.5948e-08
bio2	4	2989571	G	A	0.246725	4.80255e-08
bio2	4	2989575	T	C	0.253363	6.5059e-08
bio2	7	15692034	T	C	0.0640244	6.92475e-08
bio2	2	9145932	T	C	0.07	7.22569e-08
bio2	4	2989596	T	C	0.083691	7.65312e-08
bio2	4	2989588	C	T	0.0840517	8.21049e-08
bio2	4	2971566	A	C	0.2375	1.52994e-07
bio2	4	3226695	C	T	0.185841	1.57428e-07
bio2	4	2989555	G	C	0.257576	1.60542e-07
bio2	4	3227139	A	T	0.15	4.39689e-07
bio2	7	15692073	A	G	0.0458937	4.87178e-07
bio2	4	3211839	A	G	0.0720339	5.94417e-07
bio2	4	3205612	C	T	0.248869	7.19457e-07
bio2	7	15692061	A	G	0.0482234	7.99504e-07
bio2	4	3167182	G	A	0.101523	8.88689e-07
bio2	4	3009987	T	G	0.278302	9.73128e-07
bio3	1	4945445	C	T	0.0121457	7.83281e-14
bio3	1	815614	C	T	0.00806452	1.25932e-13
bio3	1	332359	G	A	0.0144231	1.40978e-13
bio3	4	9780226	C	A	0.00904977	2.11584e-13
bio3	1	29558758	T	C	0.052381	2.23628e-13
bio3	8	14453690	G	A	0.00858369	2.36721e-13
bio3	1	9995527	C	T	0.00985222	3.361e-13
bio3	4	19502513	A	T	0.0197368	4.91275e-13
bio3	6	5498639	A	G	0.00666667	5.49791e-13
bio3	2	9441966	G	A	0.154822	8.74861e-13
bio3	6	12174019	G	A	0.00884956	9.32829e-13
bio3	6	15601054	C	T	0.0128205	1.24535e-12
bio3	4	15429792	C	T	0.00819672	1.90256e-12
bio3	1	3926092	C	T	0.0144509	3.5129e-12
bio3	8	21463571	T	C	0.0106383	5.66459e-12
bio3	8	21463573	C	T	0.0107527	5.90955e-12
bio3	5	4574666	C	T	0.089172	2.30022e-11
bio3	4	15670448	T	C	0.25	2.66199e-11
bio3	6	23104229	C	T	0.0227273	4.50923e-11
bio3	3	6388947	G	A	0.0153846	6.80926e-11
bio3	6	16322722	T	C	0.0153846	7.33618e-11
bio3	6	14887765	C	T	0.016129	1.53048e-10
bio3	2	10151329	A	T	0.00724638	1.61301e-10
bio3	6	14927423	C	T	0.173246	1.73384e-10
bio3	7	6504336	C	T	0.00829876	2.44898e-10
bio3	1	14289479	C	T	0.0416667	2.78655e-10
bio3	2	24342960	C	T	0.0840909	3.12267e-10
bio3	6	23345355	G	A	0.456853	3.52427e-10
bio3	2	21431789	G	A	0.150307	3.75328e-10
bio3	2	21430488	A	C	0.192053	5.58699e-10
bio3	2	26579821	C	A	0.0144033	5.88524e-10
bio3	4	13372839	G	A	0.0179856	6.89569e-10
bio3	6	10627043	C	T	0.00947867	7.22114e-10
bio3	7	839089	G	A	0.025	7.4139e-10
bio3	8	8303608	A	G	0.0429864	7.80114e-10
bio3	7	1716819	C	T	0.015625	8.38456e-10
bio3	1	3649052	G	A	0.0131004	9.72042e-10
bio3	1	13897721	C	T	0.00456621	1.13525e-09
bio3	1	19869752	T	C	0.165966	1.22881e-09
bio3	5	7292466	T	A	0.00526316	1.3928e-09
bio3	6	15739145	G	A	0.0208333	1.40035e-09
bio3	2	21488455	T	G	0.0803571	1.42047e-09
bio3	1	13897578	C	T	0.00454545	1.45783e-09
bio3	5	7292463	C	T	0.00531915	1.50097e-09
bio3	6	22163152	G	A	0.0186916	2.14754e-09
bio3	1	47088200	A	G	0.0163934	2.36258e-09
bio3	5	1850454	A	G	0.177273	2.54149e-09
bio3	4	13616353	C	T	0.0135135	3.03905e-09
bio3	6	11258792	C	T	0.0911458	3.08566e-09
bio3	5	4271886	A	G	0.154321	3.29886e-09
bio3	7	1785944	A	G	0.173913	3.39905e-09
bio3	2	6414790	T	C	0.159091	3.84879e-09
bio3	2	21492158	A	G	0.0223881	3.99539e-09
bio3	6	11373040	G	A	0.107843	4.25789e-09
bio3	2	21431771	G	A	0.145833	4.39246e-09
bio3	1	3812987	A	C	0.173913	4.81211e-09
bio3	2	1087310	C	A	0.0163934	4.87709e-09
bio3	7	1795292	A	G	0.0829016	5.00228e-09
bio3	6	23352741	C	A	0.490654	5.0804e-09
bio3	6	11373067	T	C	0.112903	5.10197e-09
bio3	6	1852575	C	T	0.150376	5.42803e-09
bio3	1	17562021	T	G	0.108974	5.51386e-09
bio3	2	9604683	G	A	0.0769231	5.52699e-09
bio3	1	14042690	G	T	0.00847458	5.7751e-09
bio3	4	13285744	G	A	0.0299401	5.78393e-09
bio3	2	9953632	G	A	0.011236	5.94918e-09
bio3	5	4445859	C	T	0.222477	5.99349e-09
bio3	6	23409961	C	T	0.101382	6.08935e-09
bio3	7	1760976	C	T	0.0142857	6.68501e-09
bio3	1	29680604	G	A	0.0304878	7.25052e-09
bio3	7	1785954	G	C	0.0420354	7.28202e-09
bio3	3	16626046	T	C	0.0771429	7.32506e-09
bio3	1	17562026	T	C	0.108511	7.9337e-09
bio3	4	14865491	T	A	0.0673077	8.14245e-09
bio3	2	24358097	A	C	0.0212766	8.70314e-09
bio3	3	2082204	C	T	0.0199005	9.74843e-09
bio3	3	16630657	C	T	0.0852273	9.85686e-09
bio3	3	16630660	G	A	0.0842697	1.02789e-08
bio3	7	1795216	T	G	0.0926829	1.10113e-08
bio3	2	24358099	G	C	0.0190678	1.32137e-08
bio3	6	15821811	T	G	0.0217391	1.36636e-08
bio3	1	9995566	C	T	0.00761421	1.43067e-08
bio3	2	24515570	C	T	0.267206	1.47492e-08
bio3	3	2354265	G	A	0.00761421	1.60681e-08
bio3	2	24470769	T	C	0.389362	1.60852e-08
bio3	2	9389349	G	A	0.0634518	1.66052e-08
bio3	1	21679052	T	C	0.00857143	1.73446e-08
bio3	6	23345412	G	A	0.40051	1.91668e-08
bio3	2	24411281	C	T	0.296296	1.91715e-08
bio3	4	13286598	C	T	0.00840336	2.08055e-08
bio3	2	30397220	A	G	0.0214286	2.10477e-08
bio3	2	21431782	C	G	0.153614	2.11973e-08
bio3	2	21432410	T	C	0.167647	2.20192e-08
bio3	3	25303739	T	C	0.0495283	2.27784e-08
bio3	5	4252358	C	T	0.0669643	2.28772e-08
bio3	6	6616551	A	C	0.00714286	2.29819e-08
bio3	2	9389345	T	C	0.25	2.33428e-08
bio3	2	21429155	A	C	0.171429	2.4702e-08
bio3	6	11396659	G	T	0.0123153	2.55192e-08
bio3	1	17437710	T	C	0.275773	2.5923e-08
bio3	8	10856045	T	A	0.0350877	2.65552e-08
bio3	8	10856046	G	T	0.0350877	2.65552e-08
bio3	5	16148267	T	C	0.0697674	2.77229e-08
bio3	5	8869213	C	T	0.0125786	2.95729e-08
bio3	2	1087294	A	C	0.15896	3.05119e-08
bio3	4	14865408	T	A	0.204762	3.23617e-08
bio3	6	21586926	G	T	0.0555556	3.26453e-08
bio3	4	8883611	C	T	0.0142045	3.27286e-08
bio3	3	25258880	T	C	0.00816327	3.29243e-08
bio3	5	16148256	C	T	0.0610465	3.34115e-08
bio3	2	24358087	C	T	0.0779221	3.51166e-08
bio3	7	1822679	A	G	0.0267857	3.52359e-08
bio3	6	14980149	G	T	0.0359477	3.60033e-08
bio3	2	9877915	A	G	0.134328	3.6843e-08
bio3	6	15027926	A	G	0.0112108	3.72516e-08
bio4	2	22602323	C	T	0.182008	2.16598e-11
bio4	2	22810681	T	G	0.0897959	3.3735e-11
bio4	2	21430488	A	C	0.192053	8.61497e-11
bio4	2	22846476	C	T	0.163551	4.86749e-10
bio4	2	21502830	A	G	0.132743	7.97173e-10
bio4	1	17642613	T	A	0.0895833	1.26463e-09
bio4	2	21501771	G	T	0.147917	1.27953e-09
[truncated: 1,303 more rows]

## Sheet: Table S9
Table S9 Enrichment analyses of genes associated with more than five environmental variables
[truncated: 124 more rows]

[truncated: 3 more sheets: Table S10, Table S11, Table S12]
